# Supplementary material for: Genome-wide identification of lineage and locus specific variation associated with pneumococcal carriage duration
Source: eLife journal article supplement (doi:10.7554/elife.26255), 2017-07-25
Supplement: supp [file elife-26255-supp-v1.zip]

Archive with 17 entries (17 files):
- elife_poa_e26255_Figure_3_Figure_Supplement_1.png
- elife_poa_e26255_Figure_3_Figure_Supplement_3.png
- elife_poa_e26255_Figure_4_Figure_Supplement_3.pdf
- elife_poa_e26255_Figure_5_Figure_Supplement_1.pdf
- elife_poa_e26255_Figure_5_Figure_Supplement_5.pdf
- elife_poa_e26255_Figure_3_source_data_1.txt
- elife_poa_e26255_Figure_4_Figure_Supplement_4.pdf
- elife_poa_e26255_Figure_3_source_data_2.txt
- elife_poa_e26255_Figure_4_Figure_Supplement_2.pdf
- elife_poa_e26255_Figure_5_source_data_1.txt
- elife_poa_e26255_Figure_3_Figure_Supplement_2.png
- elife_poa_e26255_Figure_5_Figure_Supplement_2.pdf
- elife_poa_e26255_Figure_4_Figure_Supplement_1.png
- elife_poa_e26255_Figure_5_Figure_Supplement_4.pdf
- elife_poa_e26255_Table_4_source_data_1.zip
- elife_poa_e26255_Figure_5_Figure_Supplement_3.png
- elife_poa_e26255_Figure_4_source_data_1.txt
