# Supplementary material for: Genome-wide identification of lineage and locus specific variation associated with pneumococcal carriage duration
Source: eLife journal article supplement (doi:10.7554/elife.26255), 2017-07-25
Supplement: supp [file elife-26255-supp-v1.zip › elife_poa_e26255_Figure_3_source_data_1.txt]

Maela	6259_7#9	30
Maela	6664_1#5	213
Maela	6630_2#13	213
Maela	6630_4#13	213
Maela	6631_5#20	213
Maela	6730_1#18	213
Maela	6714_7#18	213
Maela	6680_7#22	95
Maela	6736_6#13	24
Maela	6259_8#5	147
Maela	6593_5#15	147
Maela	6664_1#7	147
Maela	6631_1#12	147
Maela	6730_7#1	35
Maela	6259_5#10	47
Maela	6259_6#13	47
Maela	6641_6#19	259
Maela	6673_8#20	259
Maela	6630_3#3	259
Maela	6631_4#14	120
Maela	6649_7#12	259
Maela	6730_4#14	120
Maela	6775_1#3	259
Maela	6736_8#7	28
Maela	6710_7#17	455
Maela	6710_7#18	62
Maela	6259_7#5	29
Maela	6593_5#2	150
Maela	6680_8#10	76
Maela	6630_2#18	76
Maela	6631_5#21	150
Maela	6841_7#1	54
Maela	6805_4#7	35
Maela	6823_4#18	137
Maela	6899_4#8	137
Maela	6630_2#7	121
Maela	6775_2#21	60
Maela	6807_3#3	244
Maela	6805_4#9	244
Maela	6259_5#1	15
Maela	6259_6#15	46
Maela	6259_8#19	15
Maela	6259_8#3	30
Maela	6673_8#10	91
Maela	6631_3#20	91
Maela	6649_7#9	183
Maela	6680_5#24	183
Maela	6259_7#6	122
Maela	6593_4#22	122
Maela	6630_2#14	122
Maela	6630_4#5	30
Maela	6730_6#3	107
Maela	6593_4#13	15
Maela	6259_6#3	13
Maela	6593_5#11	185
Maela	6631_6#14	185
Maela	6714_7#21	124
Maela	6680_4#7	124
Maela	6731_6#5	41
Maela	6259_6#24	107
Maela	6593_4#17	107
Maela	6649_8#24	107
Maela	6630_4#3	212
Maela	6631_5#8	212
Maela	6730_5#20	32
Maela	6714_7#8	30
Maela	6736_5#23	66
Maela	6710_7#13	88
Maela	6805_7#12	28
Maela	6925_4#5	29
Maela	6593_4#5	28
Maela	6649_8#11	31
Maela	6630_2#2	271
Maela	6630_3#8	271
Maela	6714_8#18	271
Maela	6730_5#9	271
Maela	6714_7#1	271
Maela	6736_5#6	126
Maela	6830_3#3	23
Maela	6259_6#2	48
Maela	6259_7#14	48
Maela	6631_1#5	32
Maela	6631_6#15	32
Maela	6730_6#18	29
Maela	6714_7#22	153
Maela	6736_7#17	201
Maela	6925_4#12	15
Maela	6259_8#4	195
Maela	6641_6#7	195
Maela	6673_8#13	195
Maela	6631_3#15	195
Maela	6649_7#8	195
Maela	6730_3#24	15
Maela	6730_4#1	195
Maela	6730_5#24	71
Maela	6680_7#11	88
Maela	6755_5#18	88
Maela	6805_3#3	59
Maela	6805_7#4	34
Maela	6823_3#20	76
Maela	6823_6#17	76
Maela	6925_3#5	11
Maela	6730_8#7	95
Maela	6730_8#24	95
Maela	6631_7#23	274
Maela	6649_7#3	60
Maela	6631_7#15	578
Maela	6755_2#19	578
Maela	6259_6#12	135
Maela	6259_8#9	135
Maela	6641_6#17	135
Maela	6631_2#11	135
Maela	6631_4#6	82
Maela	6731_5#21	273
Maela	6736_7#13	273
Maela	6730_6#8	32
Maela	6259_7#8	15
Maela	6631_5#16	90
Maela	6755_3#3	26
Maela	6710_6#15	216
Maela	6805_7#22	216
Maela	6823_1#8	25
Maela	6823_1#9	216
Maela	6823_4#4	216
Maela	6899_4#3	76
Maela	6925_4#10	76
Maela	7038_8#43	15
Maela	6641_6#8	212
Maela	6673_8#8	212
Maela	6631_1#24	212
Maela	6631_3#12	212
Maela	6631_7#6	212
Maela	6730_7#16	212
Maela	6641_6#4	62
Maela	6664_1#20	33
Maela	6631_1#19	256
Maela	6730_3#16	256
Maela	6753_1#14	137
Maela	6840_1#18	61
Maela	6899_5#7	137
Maela	6731_5#15	124
Maela	6755_4#23	124
Maela	6649_7#1	167
Maela	6259_6#19	15
Maela	6593_4#12	47
Maela	6593_4#23	47
Maela	6714_8#24	241
Maela	6710_6#11	90
Maela	6753_4#2	39
Maela	6925_3#7	45
Maela	6259_8#21	59
Maela	6649_8#4	59
Maela	6649_7#24	184
Maela	6730_4#18	184
Maela	6730_8#19	184
Maela	6775_2#12	184
Maela	6259_6#14	15
Maela	6259_8#16	515
Maela	6641_6#23	60
Maela	6673_8#22	60
Maela	6649_7#17	30
Maela	6755_5#2	30
Maela	6805_2#7	515
Maela	6753_3#4	515
Maela	6753_3#5	91
Maela	6807_3#19	515
Maela	6630_3#6	134
Maela	6631_4#21	30
Maela	6730_3#17	70
Maela	6630_3#24	304
Maela	6755_3#6	304
Maela	6631_6#23	304
Maela	6755_3#11	304
Maela	6680_4#20	46
Maela	6680_7#10	46
Maela	6593_4#11	29
Maela	6649_8#19	61
Maela	6630_1#17	61
Maela	6631_5#5	91
Maela	6714_8#15	91
Maela	6775_2#10	30
Maela	6680_7#5	270
Maela	6731_3#18	270
Maela	6830_3#9	95
Maela	6805_7#1	95
Maela	6925_3#17	106
Maela	6983_2#19	13
Maela	6593_5#4	275
Maela	6680_8#17	275
Maela	6630_2#20	275
Maela	6630_4#20	275
Maela	6631_6#7	275
Maela	6730_1#19	275
Maela	6730_6#15	275
Maela	6775_2#4	275
Maela	6755_3#17	275
Maela	6755_6#8	61
Maela	6710_7#1	190
Maela	6805_4#13	190
Maela	6840_1#3	190
Maela	6259_5#12	1
Maela	6259_8#12	34
Maela	6649_8#10	158
Maela	6630_3#2	158
Maela	6714_7#5	34
Maela	6731_3#12	115
Maela	6755_4#21	115
Maela	6753_3#12	87
Maela	6805_4#23	58
Maela	6805_6#13	130
Maela	6899_4#2	130
Maela	6899_4#5	130
Maela	6259_6#20	46
Maela	6593_4#9	46
Maela	6593_4#18	46
Maela	6630_1#18	30
Maela	6949_4#5	14
Maela	6631_4#24	10
Maela	6631_6#12	165
Maela	6714_8#12	165
Maela	6730_5#19	165
Maela	6775_2#11	165
Maela	6755_5#19	134
Maela	6841_7#22	30
Maela	6753_4#23	17
Maela	6925_3#2	76
Maela	7038_8#25	15
Maela	7038_8#26	76
Maela	6259_7#15	15
Maela	6731_6#15	16
Maela	6775_1#11	93
Maela	6680_4#4	1
Maela	6259_8#8	14
Maela	6641_6#5	135
Maela	6673_8#15	135
Maela	6731_6#14	61
Maela	6649_8#8	151
Maela	6630_1#6	151
Maela	6631_2#24	151
Maela	6730_4#16	138
Maela	6730_8#21	138
Maela	6680_8#2	61
Maela	6593_4#1	60
Maela	6649_8#13	60
Maela	6630_1#10	92
Maela	6630_3#1	92
Maela	6631_5#1	92
Maela	6649_7#21	123
Maela	6730_8#22	123
Maela	6680_6#11	30
Maela	6736_5#3	123
Maela	6830_3#10	27
Maela	6823_6#4	91
Maela	6899_7#16	33
Maela	6925_5#3	9
Maela	6641_6#2	61
Maela	6673_8#1	61
Maela	6680_5#22	593
Maela	6736_8#9	593
Maela	6805_5#12	94
Maela	6840_1#20	593
Maela	6899_5#8	593
Maela	6925_5#1	593
Maela	6925_6#13	593
Maela	6983_3#65	593
Maela	6753_2#21	28
Maela	6807_3#2	20
Maela	6259_7#10	75
Maela	6593_4#24	75
Maela	6680_8#19	75
Maela	6630_2#15	92
Maela	6630_4#12	92
Maela	6714_7#15	31
Maela	6755_6#12	90
Maela	7038_8#47	48
Maela	7054_6#24	101
Maela	7092_6#2	30
Maela	7092_6#3	101
Maela	7092_6#4	101
Maela	6630_3#21	101
Maela	6631_6#13	274
Maela	6753_3#23	69
Maela	6641_6#18	91
Maela	6631_4#4	29
Maela	6730_4#6	34
Maela	6730_8#6	183
Maela	6755_2#12	183
Maela	6731_3#4	183
Maela	6753_2#18	121
Maela	6983_4#92	16
Maela	6593_5#20	90
Maela	6631_3#6	30
Maela	6714_7#24	31
Maela	6664_1#3	61
Maela	6631_6#17	121
Maela	6775_1#5	14
Maela	6731_4#19	212
Maela	6755_6#15	212
Maela	6649_8#5	249
Maela	6630_1#8	249
Maela	6714_8#2	249
Maela	6730_4#13	249
Maela	6775_1#7	240
Maela	6983_5#11	17
Maela	6730_8#9	220
Maela	6730_8#20	220
Maela	6775_1#12	220
Maela	6755_2#2	220
Maela	6736_8#5	33
Maela	6593_5#7	90
Maela	6680_5#13	184
Maela	6731_1#23	184
Maela	6925_6#6	76
Maela	6925_6#10	76
Maela	7038_8#38	17
Maela	6593_5#18	241
Maela	6664_1#15	241
Maela	6631_1#9	241
Maela	6631_3#2	241
Maela	6631_6#16	241
Maela	6755_6#20	48
Maela	6593_5#9	59
Maela	6664_1#1	59
Maela	6630_4#22	60
Maela	6775_1#19	15
Maela	6680_6#23	20
Maela	6925_5#6	47
Maela	6983_3#56	47
Maela	6649_8#6	13
Maela	6631_4#8	62
Maela	6649_7#15	31
Maela	6649_7#16	62
Maela	6730_4#15	35
Maela	6755_2#15	24
Maela	6755_4#16	47
Maela	6714_7#9	212
Maela	6840_3#6	174
Maela	6840_3#11	174
Maela	6630_1#15	198
Maela	6630_3#9	198
Maela	6593_4#14	106
Maela	6680_8#5	106
Maela	6630_2#5	62
Maela	6731_2#16	250
Maela	6731_6#16	46
Maela	6710_8#7	30
Maela	6871_2#6	119
Maela	6823_7#2	119
Maela	6710_6#18	247
Maela	6680_5#14	272
Maela	6593_4#2	67
Maela	6680_6#12	88
Maela	6259_7#22	15
Maela	6641_6#6	30
Maela	6673_8#6	275
Maela	6631_7#7	275
Maela	6730_3#23	275
Maela	6730_7#15	30
Maela	6680_6#5	275
Maela	6731_2#21	275
Maela	6680_4#12	127
Maela	6731_2#6	15
Maela	6731_2#20	127
Maela	6731_3#16	127
Maela	6753_1#20	177
Maela	6259_7#21	15
Maela	6649_7#6	32
Maela	6593_5#22	14
Maela	6664_1#12	184
Maela	6631_3#5	184
Maela	6631_6#20	32
Maela	6755_1#5	32
Maela	6731_4#22	88
Maela	6805_4#21	88
Maela	6840_1#7	93
Maela	6925_4#22	107
Maela	6983_3#55	107
Maela	6983_7#63	107
Maela	6259_8#22	14
Maela	6649_8#1	60
Maela	6630_1#4	60
Maela	6631_2#19	30
Maela	6755_4#10	210
Maela	6871_1#18	124
Maela	6593_5#24	30
Maela	6631_1#18	122
Maela	6631_3#8	122
Maela	6731_2#5	60
Maela	6823_5#5	122
Maela	6925_4#13	122
Maela	7092_6#11	61
Maela	6680_5#20	61
Maela	7068_4#20	151
Maela	6830_3#12	156
Maela	6823_5#19	156
Maela	6899_6#2	156
Maela	6823_7#23	156
Maela	6755_1#19	214
Maela	6680_4#6	32
Maela	6753_4#16	362
Maela	6805_4#11	362
Maela	6823_1#3	362
Maela	7092_6#7	699
Maela	6680_6#8	699
Maela	7068_4#17	30
Maela	6630_1#13	28
Maela	6630_3#11	76
Maela	6714_8#14	76
Maela	6259_6#18	127
Maela	6593_4#21	30
Maela	6630_1#22	127
Maela	6630_4#9	30
Maela	6631_5#22	29
Maela	6755_3#4	264
Maela	6755_5#16	32
Maela	6710_8#6	16
Maela	6807_3#15	16
Maela	6755_2#7	63
Maela	6680_4#5	504
Maela	6736_7#7	9
Maela	6899_6#22	29
Maela	6593_5#13	105
Maela	6664_1#8	105
Maela	6631_1#4	105
Maela	6631_3#1	105
Maela	6731_1#22	30
Maela	6807_1#18	153
Maela	6805_4#18	153
Maela	6649_8#14	17
Maela	6630_3#5	167
Maela	6631_4#18	167
Maela	6730_5#1	167
Maela	6730_8#14	32
Maela	6673_8#9	62
Maela	6631_3#18	26
Maela	6730_1#22	18
Maela	6680_6#2	225
Maela	6680_5#21	225
Maela	6823_7#4	34
Maela	6823_7#5	17
Maela	6631_3#10	91
Maela	6631_7#1	91
Maela	6730_3#13	91
Maela	6730_7#5	32
Maela	6641_6#9	320
Maela	6649_8#2	320
Maela	6673_8#4	320
Maela	6631_3#13	320
Maela	6730_7#14	320
Maela	6680_6#3	320
Maela	6731_2#13	320
Maela	6731_6#13	320
Maela	6736_4#7	59
Maela	6710_8#12	30
Maela	6710_8#13	30
Maela	6805_5#15	150
Maela	6823_2#11	150
Maela	6925_5#16	32
Maela	6631_3#23	246
Maela	6714_8#9	246
Maela	6730_4#3	246
Maela	6730_7#23	246
Maela	6755_4#15	60
Maela	6641_6#12	322
Maela	6673_8#11	322
Maela	6631_2#4	322
Maela	6680_6#4	322
Maela	6731_2#23	322
Maela	6805_2#5	62
Maela	6736_6#2	272
Maela	6983_8#82	17
Maela	6983_8#83	141
Maela	6840_3#22	194
Maela	6823_5#13	194
Maela	6630_1#3	141
Maela	6631_4#15	141
Maela	6649_7#18	141
Maela	6730_5#12	141
Maela	6805_6#14	241
Maela	6731_2#8	118
Maela	6807_2#8	30
Maela	6805_5#6	28
Maela	6680_8#24	32
Maela	6680_8#8	275
Maela	6630_2#9	275
Maela	6631_5#19	275
Maela	6730_1#7	31
Maela	6731_4#10	30
Maela	6736_5#17	119
Maela	6753_4#5	31
Maela	6753_4#6	119
Maela	6805_4#2	210
Maela	6983_6#42	48
Maela	6641_6#20	15
Maela	6673_8#16	94
Maela	6631_2#6	30
Maela	6631_4#3	94
Maela	6730_4#4	231
Maela	6755_2#11	231
Maela	6649_8#17	140
Maela	6630_1#20	140
Maela	6631_4#22	140
Maela	6730_1#10	140
Maela	6680_6#21	124
Maela	6731_3#19	64
Maela	6736_5#10	118
Maela	6753_3#18	118
Maela	6805_6#21	28
Maela	6823_3#16	30
Maela	6899_6#20	118
Maela	6949_2#2	82
Maela	6841_7#12	43
Maela	6753_3#3	392
Maela	6823_3#3	392
Maela	6925_6#23	110
Maela	7092_6#1	105
Maela	6673_8#3	105
Maela	6631_1#20	61
Maela	7092_6#6	63
Maela	6755_3#23	244
Maela	6731_5#3	244
Maela	6736_6#10	244
Maela	6710_6#13	244
Maela	6630_2#1	30
Maela	6631_5#10	62
Maela	6714_8#20	62
Maela	6755_5#20	434
Maela	6736_5#9	434
Maela	6807_1#3	342
Maela	6830_3#24	434
Maela	6805_7#6	434
Maela	6823_4#1	434
Maela	6823_6#18	342
Maela	6925_4#2	342
Maela	7038_8#35	434
Maela	6983_5#21	342
Maela	6949_1#16	434
Maela	6630_3#20	36
Maela	6755_5#13	31
Maela	6840_3#20	32
Maela	6983_6#32	32
Maela	6949_2#8	77
Maela	6649_8#20	52
Maela	6630_2#3	52
Maela	6631_1#13	52
Maela	6680_8#1	138
Maela	6630_3#17	31
Maela	6630_3#18	138
Maela	6714_8#22	138
Maela	6730_5#22	31
Maela	6680_7#6	57
Maela	6731_3#22	63
Maela	6755_5#17	63
Maela	6673_8#12	72
Maela	6631_1#17	72
Maela	6631_7#4	220
Maela	6730_3#11	220
Maela	6730_7#3	220
Maela	6680_8#15	16
Maela	6736_7#12	101
Maela	6753_4#4	426
Maela	6807_2#18	426
Maela	6823_3#17	426
Maela	6823_7#16	426
Maela	6680_4#19	280
Maela	6680_6#9	280
Maela	6731_1#6	280
Maela	6755_2#8	51
Maela	6755_4#5	303
Maela	6664_1#13	89
Maela	6664_1#14	29
Maela	6753_4#11	381
Maela	6830_3#11	381
Maela	6680_8#13	201
Maela	6630_2#17	201
Maela	6630_4#18	201
Maela	6631_6#6	201
Maela	6714_7#14	201
Maela	6680_4#3	151
Maela	6755_6#13	151
Maela	6736_7#1	151
Maela	6805_3#12	59
Maela	6871_2#21	32
Maela	6899_5#19	16
Maela	6983_6#43	167
Maela	6949_2#22	167
Maela	6949_2#23	15
Maela	6899_7#1	64
Maela	6899_6#13	64
Maela	6680_8#20	17
Maela	6631_1#2	32
Maela	6631_6#9	215
Maela	6730_6#20	215
Maela	6731_1#7	215
Maela	6755_6#10	241
Maela	6823_5#2	152
Maela	6899_4#4	152
Maela	6925_4#3	152
Maela	7038_8#45	152
Maela	6949_2#24	15
Maela	6641_6#13	59
Maela	6664_1#23	59
Maela	6631_2#2	16
Maela	6649_8#18	16
Maela	6730_5#8	152
Maela	6736_5#5	46
Maela	6631_6#1	33
Maela	6736_5#24	275
Maela	6775_2#13	235
Maela	6680_7#9	235
Maela	6710_6#3	97
Maela	6805_2#14	97
Maela	6805_7#21	30
Maela	6925_4#4	63
Maela	6949_2#19	44
Maela	6823_6#10	15
Maela	6631_4#11	83
Maela	6631_6#3	83
Maela	6925_5#12	57
Maela	6775_1#23	275
Maela	6731_2#10	275
Maela	6753_1#1	8
Maela	6755_1#22	519
Maela	6807_1#6	157
Maela	6807_2#4	157
Maela	6673_8#7	96
Maela	6630_2#24	96
Maela	6630_4#21	96
Maela	6631_6#11	96
Maela	6730_1#17	200
Maela	6730_3#4	200
Maela	6731_1#4	200
Maela	6731_4#16	200
Maela	6805_3#17	102
Maela	6805_4#24	181
Maela	6823_4#7	181
Maela	6925_7#13	96
Maela	6823_2#14	119
Maela	6630_4#6	148
Maela	6631_5#17	148
Maela	6730_1#8	148
Maela	6730_6#4	148
Maela	6753_4#24	153
Maela	6805_4#6	32
Maela	6871_2#17	156
Maela	6823_4#5	156
Maela	6983_7#60	59
Maela	6949_3#12	59
Maela	6755_1#16	61
Maela	6753_4#14	152
Maela	6807_1#10	22
Maela	6630_2#11	16
Maela	6631_5#15	61
Maela	6730_1#3	61
Maela	6731_4#4	274
Maela	6805_4#5	274
Maela	6983_6#40	77
Maela	6775_1#18	157
Maela	6755_2#10	157
Maela	6755_3#20	32
Maela	6755_3#18	33
Maela	6630_4#15	184
Maela	6631_5#18	184
Maela	6730_6#9	184
Maela	6755_6#3	244
Maela	6841_7#18	244
Maela	6753_1#10	244
Maela	7038_8#40	44
Maela	6736_6#16	273
Maela	6807_2#24	273
Maela	6775_2#9	243
Maela	6823_7#18	55
Maela	6631_2#13	228
Maela	6714_8#8	228
Maela	6755_2#5	32
Maela	6736_4#12	172
Maela	6807_2#22	172
Maela	6805_4#1	15
Maela	6805_5#18	55
Maela	6925_6#2	149
Maela	6983_8#95	149
Maela	6949_4#6	149
Maela	6972_3#13	107
Maela	6823_6#11	92
Maela	6673_8#21	14
Maela	6631_2#17	31
Maela	6649_7#14	214
Maela	6807_3#23	211
Maela	6871_1#3	122
Maela	6823_2#23	122
Maela	6823_5#21	122
Maela	6755_1#20	183
Maela	6673_8#24	29
Maela	6631_4#10	77
Maela	6714_8#11	77
Maela	6730_4#7	62
Maela	6805_6#23	64
Maela	6823_6#2	24
Maela	6925_6#14	109
Maela	6983_4#89	109
Maela	6949_1#13	109
Maela	6630_4#24	46
Maela	6714_7#20	34
Maela	6680_5#15	347
Maela	6805_3#10	347
Maela	6730_1#6	259
Maela	6775_2#14	259
Maela	6680_7#17	259
Maela	6631_3#9	47
Maela	6730_6#14	57
Maela	6841_7#14	29
Maela	6730_1#12	31
Maela	6714_7#12	62
Maela	6731_4#8	32
Maela	6736_5#21	199
Maela	6710_6#8	199
Maela	6807_1#1	321
Maela	6983_6#48	58
Maela	6805_5#20	396
Maela	6871_1#7	396
Maela	6899_6#12	396
Maela	6983_8#89	29
Maela	6949_4#22	46
Maela	6949_4#23	46
Maela	6631_2#10	15
Maela	6631_3#21	30
Maela	6649_7#11	20
Maela	6714_8#16	13
Maela	6755_1#3	184
Maela	6731_6#2	90
Maela	6805_5#1	30
Maela	6840_1#10	62
Maela	6983_3#53	168
Maela	6730_7#12	103
Maela	6730_8#10	103
Maela	6841_7#15	220
Maela	6841_7#16	69
Maela	6680_4#17	30
Maela	6680_7#13	92
Maela	6807_3#21	128
Maela	6899_4#20	32
Maela	6983_7#70	187
Maela	6949_1#1	22
Maela	6949_2#3	22
Maela	6736_8#8	217
Maela	6630_2#12	288
Maela	6755_1#10	288
Maela	6841_7#20	90
Maela	6871_1#13	56
Maela	6631_2#7	75
Maela	6649_7#10	75
Maela	6730_7#20	62
Maela	6755_2#4	62
Maela	6755_4#8	152
Maela	6736_4#9	28
Maela	6753_2#10	181
Maela	6807_3#16	181
Maela	6983_4#86	34
Maela	6949_1#6	28
Maela	6949_4#13	45
Maela	6972_3#18	45
Maela	6730_7#18	239
Maela	6731_1#1	239
Maela	6630_1#5	15
Maela	6730_4#21	242
Maela	6680_6#22	242
Maela	6841_7#5	242
Maela	6805_2#10	30
Maela	6830_3#8	63
Maela	6805_6#15	63
Maela	6840_3#12	62
Maela	6925_7#6	124
Maela	6730_3#20	89
Maela	6730_4#12	89
Maela	6899_6#4	153
Maela	6899_5#10	153
Maela	6949_3#9	56
Maela	6925_7#15	130
Maela	6972_4#18	130
Maela	6631_2#15	15
Maela	6631_2#16	15
Maela	6631_4#9	30
Maela	6649_7#13	30
Maela	6730_7#24	30
Maela	6680_6#14	122
Maela	6805_2#2	150
Maela	6830_3#1	155
Maela	6805_6#24	155
Maela	6840_3#18	155
Maela	6823_2#21	155
Maela	6823_5#22	29
Maela	6925_6#22	60
Maela	6983_4#91	60
Maela	6983_8#87	28
Maela	6972_3#1	43
Maela	6649_7#7	60
Maela	6730_8#3	61
Maela	6680_6#18	360
Maela	6731_3#1	360
Maela	6736_8#23	27
Maela	6840_1#13	360
Maela	6823_2#1	360
Maela	6823_5#6	360
Maela	6983_4#87	91
Maela	6983_8#96	91
Maela	6730_4#22	214
Maela	6731_2#7	214
Maela	6925_4#16	64
Maela	6755_3#24	216
Maela	6631_4#2	79
Maela	6730_4#5	79
Maela	6730_8#4	31
Maela	6731_3#3	59
Maela	6736_4#15	29
Maela	6753_2#16	30
Maela	6807_3#5	36
Maela	6830_3#21	36
Maela	6753_1#22	135
Maela	6807_1#21	135
Maela	6730_7#11	215
Maela	6710_8#22	232
Maela	6871_1#21	232
Maela	6899_6#14	174
Maela	6925_6#9	29
Maela	6925_4#6	174
Maela	6983_3#69	174
Maela	6630_4#8	15
Maela	6631_5#24	29
Maela	6755_6#5	300
Maela	6736_7#18	300
Maela	6710_7#11	300
Maela	6871_2#8	300
Maela	6823_6#5	97
Maela	6983_5#23	86
Maela	6949_2#10	86
Maela	6972_5#7	15
Maela	6710_8#3	63
Maela	6805_2#9	63
Maela	6823_6#24	125
Maela	6680_7#21	229
Maela	6736_7#4	229
Maela	6830_3#23	212
Maela	6823_3#23	61
Maela	6823_3#24	212
Maela	6983_7#52	93
Maela	6949_2#11	26
Maela	6925_7#16	45
Maela	6775_1#8	152
Maela	6736_6#17	29
Maela	6925_5#14	29
Maela	6925_5#9	16
Maela	6714_8#17	61
Maela	6775_2#5	58
Maela	6753_3#10	31
Maela	6840_3#15	92
Maela	6823_3#18	227
Maela	6823_6#12	227
Maela	6983_2#10	227
Maela	6983_5#15	227
Maela	6949_2#16	227
Maela	6925_8#14	40
Maela	6972_4#23	227
Maela	6730_6#10	122
Maela	6736_7#11	32
Maela	6805_5#9	61
Maela	6823_5#1	56
Maela	6899_4#7	45
Maela	6983_7#65	97
Maela	6949_4#9	17
Maela	6631_6#2	32
Maela	6730_5#3	31
Maela	6807_2#15	96
Maela	6823_6#3	199
Maela	6899_7#9	211
Maela	6949_1#10	47
Maela	6925_7#5	199
Maela	6730_8#1	61
Maela	6680_6#17	459
Maela	6731_2#14	459
Maela	6731_3#7	459
Maela	6753_2#17	459
Maela	6871_1#16	459
Maela	6823_3#11	459
Maela	6972_3#17	29
Maela	6925_6#5	330
Maela	6823_1#14	148
Maela	6983_2#7	188
Maela	7038_8#44	188
Maela	6805_2#15	366
Maela	6983_2#4	68
Maela	6983_7#51	68
Maela	6753_3#24	215
Maela	6630_4#14	413
Maela	6631_6#4	413
Maela	6730_3#1	413
Maela	6730_6#11	413
Maela	6775_2#24	413
Maela	6805_3#18	244
Maela	6805_3#19	117
Maela	6807_1#8	244
Maela	6871_2#12	244
Maela	6925_4#8	244
Maela	6949_3#13	135
Maela	6925_8#13	135
Maela	6938_5#4	135
Maela	6710_7#16	106
Maela	6807_2#3	199
Maela	6823_1#18	199
Maela	6925_4#18	199
Maela	6983_3#49	30
Maela	6983_7#56	59
Maela	6938_5#12	48
Maela	6631_4#12	198
Maela	6823_3#10	484
Maela	6949_1#3	30
Maela	6972_4#7	484
Maela	6805_5#17	37
Maela	6805_7#9	37
Maela	6730_4#24	242
Maela	6730_8#23	242
Maela	6775_1#22	242
Maela	6731_3#14	242
Maela	6736_5#1	242
Maela	6805_2#16	30
Maela	6823_3#14	33
Maela	6823_6#6	61
Maela	6899_7#18	61
Maela	6983_2#15	32
Maela	6949_1#18	61
Maela	6972_4#20	73
Maela	6823_3#19	121
Maela	6899_6#3	270
Maela	6899_4#9	270
Maela	6730_1#20	32
Maela	6714_7#11	122
Maela	6731_4#11	122
Maela	6805_3#13	105
Maela	7004_5#3	48
Maela	7004_5#4	48
Maela	6840_3#8	526
Maela	6823_5#8	526
Maela	6899_5#18	135
Maela	7038_8#31	135
Maela	7038_8#32	526
Maela	6983_5#4	135
Maela	6983_5#5	526
Maela	6805_2#6	64
Maela	6805_5#21	122
Maela	6983_4#95	94
Maela	6925_7#2	94
Maela	6938_6#20	15
Maela	6631_4#17	139
Maela	6649_7#23	139
Maela	6755_5#7	30
Maela	6805_6#17	61
Maela	6840_3#2	61
Maela	6840_3#3	30
Maela	6823_3#9	29
Maela	6899_7#11	66
Maela	6983_5#19	32
Maela	6925_7#12	57
Maela	6972_4#13	45
Maela	6938_7#7	15
Maela	6755_1#17	66
Maela	6775_1#15	20
Maela	6631_5#7	15
Maela	6730_5#17	280
Maela	6731_3#24	280
Maela	6736_5#15	35
Maela	6805_6#5	42
Maela	6840_1#14	42
Maela	6925_4#15	65
Maela	6983_2#12	35
Maela	6731_2#15	154
Maela	6710_8#23	154
Maela	6807_1#22	60
Maela	6807_3#4	60
Maela	6823_3#1	62
Maela	6925_3#24	33
Maela	6730_1#5	58
Maela	6730_5#6	58
Maela	6753_4#19	61
Maela	6823_7#3	28
Maela	6983_5#16	31
Maela	6755_1#7	93
Maela	6755_2#9	93
Maela	6631_4#13	81
Maela	6649_7#20	81
Maela	6730_4#20	81
Maela	6736_4#24	209
Maela	6807_1#7	52
Maela	6823_4#14	181
Maela	6823_6#15	92
Maela	6807_1#12	60
Maela	6823_1#23	28
Maela	6823_4#17	30
Maela	6983_3#50	126
Maela	6972_2#2	39
Maela	6731_5#2	181
Maela	6731_5#11	181
Maela	6949_3#18	90
Maela	6925_7#9	90
Maela	6680_6#13	28
Maela	6805_3#14	31
Maela	7038_8#33	148
Maela	6949_3#2	148
Maela	6823_1#13	515
Maela	6823_4#13	515
Maela	6823_6#14	515
Maela	6730_8#8	91
Maela	6775_2#15	214
Maela	6730_1#16	183
Maela	6755_5#24	62
Maela	6753_4#7	304
Maela	7038_8#37	244
Maela	6949_3#1	244
Maela	6925_8#7	74
Maela	6938_8#14	74
Maela	6730_6#13	46
Maela	6753_2#13	30
Maela	6731_2#2	90
Maela	6731_4#20	90
Maela	6736_8#6	29
Maela	6823_1#21	62
Maela	6899_4#18	183
Maela	6925_5#4	61
Maela	6938_5#19	46
Maela	7011_3#15	15
Maela	7011_3#16	46
Maela	6631_1#22	13
Maela	6631_3#4	59
Maela	6680_4#8	122
Maela	6731_5#9	31
Maela	6710_6#19	11
Maela	6755_1#8	72
Maela	6680_4#15	9
Maela	6730_4#9	94
Maela	6755_2#16	94
Maela	6755_4#12	273
Maela	6805_6#2	273
Maela	6899_6#17	240
Maela	6983_4#93	240
Maela	6983_8#94	28
Maela	6949_4#18	29
Maela	6714_8#13	78
Maela	6730_5#11	78
Maela	6775_2#7	61
Maela	6731_3#20	31
Maela	6736_5#7	61
Maela	6841_7#19	29
Maela	6805_2#19	123
Maela	6830_3#14	123
Maela	6949_1#20	57
Maela	6925_7#14	31
Maela	6972_5#4	64
Maela	6938_7#14	48
Maela	6938_7#15	64
Maela	7011_6#17	48
Maela	6775_1#10	300
Maela	6736_6#1	309
Maela	6841_7#9	309
Maela	7068_4#24	85
Maela	6899_4#16	60
Maela	6730_1#11	30
Maela	6730_5#18	426
Maela	6680_7#18	426
Maela	6731_4#5	426
Maela	6949_2#17	182
Maela	6925_8#12	75
Maela	6972_5#22	182
Maela	6938_8#12	75
Maela	6730_3#7	152
Maela	6736_7#16	132
Maela	6753_1#2	132
Maela	6680_4#1	289
Maela	6680_4#24	289
Maela	6731_6#11	62
Maela	6736_8#13	188
Maela	6710_8#8	188
Maela	6753_2#1	188
Maela	6807_3#14	30
Maela	6938_6#19	45
Maela	7011_5#2	45
Maela	6899_6#7	182
Maela	6730_4#19	164
Maela	6730_8#16	164
Maela	6805_2#12	110
Maela	6830_3#4	246
Maela	6871_1#22	246
Maela	6983_5#8	246
Maela	6949_1#9	32
Maela	6972_3#21	73
Maela	7011_5#15	73
Maela	6755_3#5	33
Maela	6736_4#11	35
Maela	6680_7#4	60
Maela	6840_1#9	381
Maela	6925_4#11	381
Maela	6983_6#45	381
Maela	6925_8#1	381
Maela	6972_5#5	381
Maela	7004_6#28	381
Maela	7068_4#23	222
Maela	6899_4#19	222
Maela	6925_3#8	101
Maela	6731_5#10	92
Maela	6755_6#18	92
Maela	6736_8#2	305
Maela	6899_5#1	305
Maela	6899_6#6	275
Maela	6755_1#2	17
Maela	6736_8#10	261
Maela	6753_2#6	31
Maela	6823_2#17	30
Maela	6925_6#19	133
Maela	6983_4#79	133
Maela	6949_1#15	133
Maela	6949_4#11	72
Maela	6871_2#15	192
Maela	6823_2#19	192
Maela	6775_2#1	153
Maela	6736_8#14	304
Maela	6871_1#1	304
Maela	6823_2#13	30
Maela	6823_5#10	304
Maela	6925_5#23	304
Maela	6949_4#12	139
Maela	6938_6#12	32
Maela	7011_5#6	139
Maela	6938_7#24	31
Maela	6938_8#4	45
Maela	7011_4#20	45
Maela	6755_1#6	365
Maela	6736_4#1	32
Maela	6807_2#7	365
Maela	6823_2#2	365
Maela	6925_5#5	256
Maela	6938_5#20	256
Maela	7011_3#18	256
Maela	6755_3#12	34
Maela	6680_5#9	240
Maela	6938_3#26	227
Maela	6938_3#28	30
Maela	6938_3#29	227
Maela	6938_3#30	48
Maela	6938_3#31	227
Maela	6938_3#33	48
Maela	6731_2#1	30
Maela	6731_6#3	303
Maela	6753_1#4	303
Maela	6899_5#6	91
Maela	6925_4#20	119
Maela	6949_3#20	119
Maela	6938_5#18	30
Maela	7011_3#14	26
Maela	7011_6#19	23
Maela	7004_6#45	23
Maela	6680_4#14	93
Maela	6841_7#6	321
Maela	6753_2#14	321
Maela	6925_5#8	60
Maela	6938_3#25	57
Maela	6938_3#27	57
Maela	6938_3#32	45
Maela	6755_6#14	272
Maela	6805_4#17	366
Maela	6823_4#15	366
Maela	6983_7#49	366
Maela	6925_8#21	366
Maela	6938_5#7	366
Maela	7011_3#10	366
Maela	6731_2#11	30
Maela	6736_8#1	74
Maela	6755_3#10	30
Maela	6755_3#9	91
Maela	6680_4#21	91
Maela	6736_6#18	84
Maela	6841_7#11	42
Maela	6925_6#8	149
Maela	6983_2#13	149
Maela	6730_3#5	42
Maela	6710_7#21	240
Maela	6753_1#15	240
Maela	6805_4#15	64
Maela	6840_1#16	64
Maela	6823_4#24	240
Maela	7038_8#46	121
Maela	6983_5#2	121
Maela	6983_7#58	121
Maela	6949_3#16	28
Maela	6949_3#17	121
Maela	6972_2#1	28
Maela	7011_3#11	47
Maela	7004_6#34	47
Maela	6899_5#24	422
Maela	6925_3#6	422
Maela	6755_2#3	40
Maela	6680_6#15	59
Maela	6805_5#24	63
Maela	6805_6#16	245
Maela	6823_2#22	27
Maela	6949_1#4	196
Maela	6949_4#20	196
Maela	6972_3#10	196
Maela	7004_5#10	196
Maela	6840_1#5	40
Maela	6755_2#21	78
Maela	6775_1#6	78
Maela	6755_5#1	122
Maela	6736_4#22	56
Maela	6807_1#9	220
Maela	6736_7#24	161
Maela	6710_7#20	161
Maela	6736_4#5	303
Maela	6753_1#21	121
Maela	6840_1#21	121
Maela	6899_5#11	23
Maela	6899_5#14	23
Maela	6983_3#67	31
Maela	6755_6#17	120
Maela	6805_3#22	120
Maela	6807_1#17	90
Maela	6840_1#4	90
Maela	6925_4#19	152
Maela	6972_2#3	107
Maela	6938_5#11	31
Maela	6680_4#11	38
Maela	6680_5#12	38
Maela	7068_4#18	192
Maela	6753_4#12	192
Maela	6807_1#24	14
Maela	6823_7#14	182
Maela	6938_7#21	182
Maela	7011_4#14	7
Maela	6755_3#19	418
Maela	6736_7#3	119
Maela	6805_3#20	46
Maela	6823_1#1	418
Maela	6871_2#24	24
Maela	6840_3#1	418
Maela	6925_3#1	76
Maela	6938_5#9	160
Maela	6938_7#2	9
Maela	6736_5#20	117
Maela	6805_3#4	117
Maela	6753_3#21	117
Maela	6805_4#3	32
Maela	6805_7#15	124
Maela	6925_3#16	60
Maela	6983_6#38	121
Maela	6925_8#10	121
Maela	6972_5#24	121
Maela	6938_8#11	77
Maela	7011_6#24	77
Maela	7004_7#72	77
Maela	6755_2#6	76
Maela	6807_1#23	31
Maela	6775_2#3	108
Maela	6731_3#11	108
Maela	6731_4#13	23
Maela	6823_3#22	26
Maela	6925_4#7	61
Maela	6925_7#22	131
Maela	6755_1#11	32
Maela	6736_8#17	121
Maela	6823_7#8	304
Maela	6925_3#23	304
Maela	6949_3#7	62
Maela	6925_7#24	36
Maela	6731_3#10	166
Maela	6730_5#14	16
Maela	6736_5#8	61
Maela	6710_6#2	61
Maela	6753_3#19	128
Maela	6805_5#14	128
Maela	6823_4#11	17
Maela	6736_6#11	152
Maela	6949_3#22	30
Maela	6731_2#22	106
Maela	6731_6#19	63
Maela	6753_1#23	89
Maela	6871_1#4	153
Maela	6823_5#20	153
Maela	6949_4#4	29
Maela	6736_7#8	60
Maela	6731_4#1	121
Maela	6805_3#2	91
Maela	6871_2#5	472
Maela	7038_8#30	472
Maela	6983_7#54	31
Maela	6938_7#18	472
Maela	7011_6#12	472
Maela	7004_7#56	472
Maela	7038_5#1	472
Maela	6755_2#18	15
Maela	6736_4#19	98
Maela	6755_2#14	50
Maela	6680_6#24	289
Maela	6755_4#11	289
Maela	6805_2#24	34
Maela	6840_3#4	289
Maela	6983_4#83	49
Maela	6823_7#10	276
Maela	6871_2#1	30
Maela	6823_7#24	47
Maela	6983_2#23	67
Maela	6983_6#25	52
Maela	6736_4#16	218
Maela	6807_2#6	218
Maela	6925_5#20	148
Maela	6983_8#74	148
Maela	6972_2#21	148
Maela	6731_1#19	108
Maela	6731_5#14	188
Maela	6710_7#7	120
Maela	6805_3#21	120
Maela	6823_1#11	95
Maela	6823_4#19	52
Maela	6899_5#3	52
Maela	6983_7#55	30
Maela	6972_2#5	90
Maela	6938_5#13	90
Maela	7004_6#36	76
Maela	7004_8#88	76
Maela	6823_2#15	30
Maela	6983_5#6	33
Maela	6925_8#22	88
Maela	6938_7#9	88
Maela	7038_4#2	9
Maela	6731_6#21	198
Maela	6823_2#12	215
Maela	6899_5#22	24
Maela	6925_5#18	215
Maela	6983_4#77	92
Maela	6983_8#77	92
Maela	6972_3#4	120
Maela	6938_6#3	120
Maela	7004_5#21	33
Maela	7004_5#22	74
Maela	7038_4#1	74
Maela	7038_6#23	74
Maela	6736_4#18	66
Maela	6731_1#8	20
Maela	6731_2#3	180
Maela	6736_7#23	28
Maela	6840_1#15	310
Maela	6823_1#24	310
Maela	6823_4#22	310
Maela	6983_8#78	310
Maela	6972_2#11	88
Maela	6938_6#1	88
Maela	7004_6#47	32
Maela	6753_1#8	210
Maela	6823_1#16	153
Maela	6899_4#21	153
Maela	6983_3#51	46
Maela	6938_5#15	123
Maela	6938_5#16	106
Maela	7004_6#38	123
Maela	7004_8#86	123
Maela	6823_5#14	322
Maela	6949_3#14	153
Maela	7004_7#61	16
Maela	6755_3#2	32
Maela	6805_4#10	685
Maela	6823_4#2	685
Maela	6823_7#20	685
Maela	7038_8#39	685
Maela	6949_2#4	685
Maela	6972_5#21	685
Maela	6938_8#10	29
Maela	7004_7#71	685
Maela	6710_8#4	333
Maela	6899_7#2	32
Maela	6972_4#1	29
Maela	6972_4#2	191
Maela	6938_6#14	191
Maela	7011_3#6	191
Maela	6871_2#23	46
Maela	6823_1#6	46
Maela	6823_6#21	33
Maela	6775_1#2	14
Maela	6871_2#2	31
Maela	6805_2#11	31
Maela	6807_3#12	221
Maela	6805_6#6	221
Maela	6871_1#17	123
Maela	6899_5#17	123
Maela	6983_4#84	290
Maela	6983_8#92	290
Maela	6972_4#5	290
Maela	6972_4#6	20
Maela	6938_5#1	18
Maela	6938_7#8	290
Maela	7011_5#5	290
Maela	7004_5#23	290
Maela	7038_4#7	14
Maela	7038_4#8	290
Maela	6753_3#2	93
Maela	6755_3#21	317
Maela	7011_3#23	304
Maela	7011_3#24	318
Maela	7011_4#2	304
Maela	7011_4#8	36
Maela	7011_5#23	36
Maela	6731_2#24	122
Maela	6731_6#24	25
Maela	6736_4#14	122
Maela	6736_8#21	173
Maela	6805_2#1	173
Maela	6736_6#8	114
Maela	6736_8#19	114
Maela	6680_7#3	77
Maela	6731_4#2	61
Maela	6755_5#9	61
Maela	6753_4#3	322
Maela	6805_7#13	322
Maela	6823_6#20	322
Maela	6949_3#3	209
Maela	6938_8#9	209
Maela	7011_5#8	209
Maela	7004_7#65	209
Maela	7038_5#18	15
Maela	7004_5#1	91
Maela	6755_4#4	91
Maela	6731_5#5	93
Maela	6731_6#8	93
Maela	6938_3#23	276
Maela	6938_6#2	61
Maela	6938_7#16	61
Maela	6755_4#9	62
Maela	6805_5#2	30
Maela	6983_3#57	104
Maela	6983_8#73	104
Maela	6949_3#24	104
Maela	6938_5#21	62
Maela	6755_1#13	15
Maela	6731_6#6	119
Maela	6736_7#20	119
Maela	6710_7#24	31
Maela	6805_5#5	121
Maela	6823_2#3	155
Maela	6949_4#8	57
Maela	7011_3#9	94
Maela	7004_6#44	94
Maela	7004_8#89	94
Maela	7038_6#13	15
Maela	6807_3#6	144
Maela	6823_2#9	144
Maela	6925_5#7	93
Maela	6983_3#68	96
Maela	6983_8#80	93
Maela	6925_7#1	56
Maela	7011_5#17	57
Maela	7004_5#7	57
Maela	7004_8#91	24
Maela	7038_6#4	21
Maela	7038_6#16	6
Maela	6753_1#16	150
Maela	6807_2#14	245
Maela	6805_5#7	245
Maela	6823_5#4	245
Maela	6983_3#63	245
Maela	6983_8#84	29
Maela	6972_2#9	179
Maela	6972_3#20	179
Maela	6938_6#5	179
Maela	6938_8#24	179
Maela	7011_4#11	179
Maela	7004_5#5	28
Maela	7038_7#24	179
Maela	6823_2#5	331
Maela	6983_2#3	335
Maela	6983_4#82	89
Maela	6736_7#14	117
Maela	7038_7#4	212
Maela	7038_7#10	212
Maela	7038_7#11	30
Maela	7054_4#5	19
Maela	6736_6#14	337
Maela	6753_3#9	33
Maela	6680_5#16	33
Maela	6680_6#1	33
Maela	6755_6#4	212
Maela	6983_3#62	257
Maela	6972_2#8	257
Maela	6938_5#14	257
Maela	7011_3#20	257
Maela	7011_3#21	62
Maela	7004_6#41	62
Maela	7004_8#87	257
Maela	7038_6#11	257
Maela	6753_3#13	32
Maela	6899_5#9	152
Maela	6755_4#17	123
Maela	6736_7#22	213
Maela	6871_1#9	122
Maela	6753_4#1	31
Maela	6805_7#8	31
Maela	6840_3#23	36
Maela	6938_7#20	121
Maela	6938_8#1	121
Maela	6938_8#3	121
Maela	7011_3#5	121
Maela	7038_6#19	23
Maela	6823_3#2	276
Maela	6823_4#9	276
Maela	6731_1#9	93
Maela	6680_4#18	265
Maela	6680_7#14	265
Maela	6972_2#16	375
Maela	6972_2#17	86
Maela	6972_2#20	375
Maela	6972_3#16	375
Maela	7011_4#1	375
Maela	7011_4#5	375
Maela	7011_4#23	375
Maela	7011_5#24	375
Maela	6731_6#9	92
Maela	6949_3#6	304
Maela	6871_2#3	151
Maela	7011_4#15	69
Maela	7038_5#12	69
Maela	6736_6#15	212
Maela	6805_3#16	150
Maela	6753_4#20	212
Maela	6805_4#14	212
Maela	6949_2#21	285
Maela	7004_8#79	285
Maela	6731_5#23	64
Maela	7054_5#3	75
Maela	7054_5#11	75
Maela	7054_5#22	75
Maela	6680_6#6	77
Maela	6830_3#6	338
Maela	6823_3#6	338
Maela	6899_7#7	56
Maela	6925_6#24	56
Maela	6983_5#10	32
Maela	6972_4#16	34
Maela	6972_5#18	34
Maela	6938_7#3	26
Maela	6938_7#4	56
Maela	7011_5#10	56
Maela	7004_5#24	31
Maela	7038_4#12	15
Maela	7038_4#13	15
Maela	7011_3#22	126
Maela	7011_4#6	21
Maela	7011_5#18	62
Maela	7011_5#19	67
Maela	6731_1#15	150
Maela	6731_4#18	150
Maela	6710_7#8	304
Maela	6710_7#9	30
Maela	6805_3#23	304
Maela	6823_4#16	30
Maela	6925_4#23	304
Maela	7038_8#48	304
Maela	6972_2#6	62
Maela	7004_6#37	30
Maela	6840_3#24	338
Maela	6731_4#14	26
Maela	6736_5#16	53
Maela	6710_6#22	53
Maela	6710_8#5	17
Maela	6753_1#3	243
Maela	6753_4#22	243
Maela	6805_4#8	243
Maela	6805_7#16	243
Maela	6871_2#14	243
Maela	6823_1#10	243
Maela	6983_6#47	93
Maela	6925_8#8	89
Maela	6938_5#6	89
Maela	7011_3#4	89
Maela	7004_6#31	32
Maela	7004_6#32	122
Maela	7004_8#84	122
Maela	7004_8#85	74
Maela	7038_5#24	122
Maela	7054_4#20	74
Maela	6731_6#23	152
Maela	6871_1#5	151
Maela	6983_4#81	61
Maela	6983_8#90	61
Maela	6972_3#15	30
Maela	6938_6#13	30
Maela	7004_8#96	31
Maela	7092_6#13	15
Maela	6753_1#18	210
Maela	6823_2#6	65
Maela	6925_5#15	14
Maela	6753_2#4	242
Maela	6805_5#16	242
Maela	6840_1#22	242
Maela	6925_5#21	181
Maela	6983_4#75	30
Maela	6972_3#3	181
Maela	6938_6#8	181
Maela	7011_4#13	92
Maela	7004_5#15	92
Maela	7004_5#16	30
Maela	7004_8#90	92
Maela	7038_7#17	47
Maela	7054_6#11	47
Maela	6805_5#19	150
Maela	6983_4#76	364
Maela	6983_8#86	364
Maela	6972_3#14	364
Maela	7011_4#16	364
Maela	7004_5#6	364
Maela	7054_6#12	15
Maela	6972_3#24	59
Maela	6972_4#9	20
Maela	6731_3#9	32
Maela	6755_4#20	61
Maela	6823_2#24	181
Maela	6823_5#18	181
Maela	6899_5#13	61
Maela	6949_4#24	226
Maela	6972_3#19	226
Maela	6938_6#15	59
Maela	6938_6#16	226
Maela	7011_4#17	226
Maela	7011_4#18	59
Maela	7011_4#21	59
Maela	7011_4#22	226
Maela	7004_5#11	226
Maela	7038_4#3	61
Maela	7038_7#18	61
Maela	7054_6#9	226
Maela	6680_5#17	49
Maela	6805_5#13	91
Maela	6823_5#7	94
Maela	6983_3#71	72
Maela	6823_1#2	58
Maela	6972_2#4	62
Maela	7038_7#13	63
Maela	7054_5#12	63
Maela	7054_5#16	63
Maela	6731_1#5	181
Maela	6755_6#7	181
Maela	6710_6#17	181
Maela	6899_4#1	213
Maela	6925_3#10	62
Maela	6925_3#11	213
Maela	7038_8#41	62
Maela	7038_8#42	213
Maela	6949_2#20	152
Maela	6925_8#20	152
Maela	6938_5#5	152
Maela	7004_6#26	152
Maela	7004_8#74	78
Maela	7038_6#7	78
Maela	7054_4#21	15
Maela	6753_4#13	152
Maela	6805_5#3	120
Maela	7011_5#22	30
Maela	7004_5#17	60
Maela	6938_3#34	25
Maela	7004_5#2	243
Maela	6731_1#3	59
Maela	6755_6#2	396
Maela	6736_5#19	396
Maela	6710_6#10	396
Maela	6753_4#17	396
Maela	6805_4#16	396
Maela	6871_2#20	396
Maela	6925_3#14	396
Maela	6983_6#46	396
Maela	6949_2#9	29
Maela	6972_5#20	60
Maela	6938_8#19	60
Maela	6938_8#20	200
Maela	7011_6#22	200
Maela	7004_7#66	200
Maela	7004_7#67	30
Maela	7038_5#23	200
Maela	7054_4#18	200
Maela	6731_1#13	95
Maela	6807_3#1	394
Maela	6899_6#21	394
Maela	6899_4#24	238
Maela	6983_2#21	394
Maela	6983_2#22	238
Maela	6972_5#11	151
Maela	6938_5#22	151
Maela	6938_8#6	11
Maela	6938_8#7	151
Maela	6731_4#7	279
Maela	6925_3#9	339
Maela	6983_7#50	339
Maela	6925_7#11	339
Maela	6972_5#6	339
Maela	6938_8#21	339
Maela	7011_6#20	339
Maela	7004_8#81	339
Maela	7054_4#10	59
Maela	7092_6#23	59
Maela	7092_6#24	339
Maela	7068_4#5	339
Maela	6680_6#19	166
Maela	6841_7#8	243
Maela	6753_3#17	243
Maela	6983_2#14	30
Maela	6983_5#12	91
Maela	6949_1#19	62
Maela	6925_8#17	62
Maela	6938_7#5	75
Maela	7011_6#1	119
Maela	7004_7#51	119
Maela	7038_4#21	76
Maela	7054_4#9	76
Maela	7092_6#17	76
Maela	6805_2#21	150
Maela	6983_7#61	150
Maela	6949_3#19	123
Maela	6938_5#24	123
Maela	7011_3#17	123
Maela	7004_6#43	31
Maela	7038_6#14	30
Maela	6805_3#6	220
Maela	6899_6#24	220
Maela	6823_7#1	220
Maela	6755_3#13	7
Maela	6807_1#14	26
Maela	6830_3#22	273
Maela	6731_3#13	121
Maela	6753_3#15	30
Maela	6899_7#20	304
Maela	6983_5#13	304
Maela	6949_1#17	304
Maela	6972_5#2	32
Maela	7011_6#6	31
Maela	7011_6#7	304
Maela	7004_7#55	304
Maela	6731_3#21	120
Maela	6755_5#12	120
Maela	6736_5#11	29
Maela	6841_7#17	120
Maela	6805_2#23	29
Maela	6753_3#22	184
Maela	6830_3#18	184
Maela	6871_2#9	61
Maela	6823_6#23	184
Maela	6899_7#24	64
Maela	6983_6#37	305
Maela	6949_2#7	28
Maela	6925_7#20	305
Maela	7011_6#11	305
Maela	7004_7#58	305
Maela	7054_4#11	305
Maela	6899_5#21	39
Maela	6710_8#19	33
Maela	6753_1#9	209
Maela	7068_4#22	209
Maela	6899_6#23	119
Maela	6949_3#5	90
Maela	6925_7#23	90
Maela	6807_3#20	149
Maela	6983_2#6	94
Maela	6983_5#7	36
Maela	6755_4#18	32
Maela	6736_4#13	60
Maela	6736_8#16	121
Maela	6753_2#5	121
Maela	6807_3#8	30
Maela	6823_2#16	243
Maela	6925_5#24	243
Maela	6983_4#85	243
Maela	6972_3#12	243
Maela	7011_4#24	122
Maela	7004_5#14	60
Maela	7004_8#95	60
Maela	7038_6#24	122
Maela	7054_6#16	16
Maela	6736_5#18	334
Maela	6753_4#9	61
Maela	6925_3#15	60
Maela	7038_8#36	152
Maela	6983_6#35	152
Maela	6925_8#9	59
Maela	6938_8#15	92
Maela	7011_6#23	30
Maela	7004_8#73	92
Maela	7038_6#1	47
Maela	7038_6#2	31
Maela	6753_3#11	151
Maela	6983_3#58	30
Maela	6805_2#3	60
Maela	6807_3#7	212
Maela	6871_1#14	127
Maela	6823_3#7	127
Maela	6925_6#18	83
Maela	6983_4#96	83
Maela	6949_4#3	94
Maela	6972_4#24	94
Maela	6938_6#24	94
Maela	6938_7#1	27
Maela	7011_5#9	130
Maela	7004_5#12	130
Maela	7038_4#6	130
Maela	7038_7#16	130
Maela	7054_6#8	130
Maela	6680_7#7	112
Maela	6983_2#18	60
Maela	6983_6#31	60
Maela	6949_2#1	36
Maela	6972_5#17	169
Maela	6938_7#13	169
Maela	7004_6#29	57
Maela	7004_7#64	57
Maela	7038_4#9	169
Maela	7038_7#20	50
Maela	7092_6#19	17
Maela	6807_2#9	69
Maela	6807_2#19	69
Maela	6823_7#12	525
Maela	6972_2#14	525
Maela	6972_2#19	184
Maela	7038_5#2	525
Maela	7038_5#3	184
Maela	7038_5#5	184
Maela	7038_7#7	184
Maela	7038_7#14	184
Maela	6680_7#16	79
Maela	6755_5#22	79
Maela	6710_6#5	32
Maela	6753_4#10	224
Maela	6823_3#21	224
Maela	6899_6#10	224
Maela	6983_6#34	217
Maela	6949_3#11	217
Maela	6972_4#17	26
Maela	7004_6#39	217
Maela	7054_6#5	42
Maela	7068_4#3	42
Maela	6753_2#19	67
Maela	6805_6#3	276
Maela	6899_6#18	276
Maela	6925_6#15	31
Maela	6983_5#3	274
Maela	6949_1#7	274
Maela	7004_5#20	274
Maela	7038_4#5	274
Maela	7038_7#22	274
Maela	6871_2#19	147
Maela	6899_6#15	17
Maela	6925_3#12	22
Maela	6925_3#13	147
Maela	6925_8#5	124
Maela	6938_5#23	124
Maela	6938_8#18	56
Maela	7011_6#18	56
Maela	7004_8#76	63
Maela	7038_6#5	63
Maela	7054_4#15	45
Maela	7068_4#10	15
Maela	7068_4#9	45
Maela	6899_5#5	28
Maela	6925_4#17	30
Maela	6755_5#6	61
Maela	6830_3#13	215
Maela	6871_2#11	215
Maela	6823_5#23	30
Maela	6899_7#22	215
Maela	6983_2#20	61
Maela	6983_5#24	61
Maela	6925_7#10	120
Maela	6972_4#22	120
Maela	7011_6#5	29
Maela	7038_4#17	32
Maela	7054_6#22	15
Maela	6731_5#16	58
Maela	6710_8#11	275
Maela	6871_1#8	275
Maela	6983_8#75	89
Maela	6938_6#4	58
Maela	7011_4#12	58
Maela	7004_6#48	32
Maela	7004_8#94	32
Maela	7038_6#22	32
Maela	7092_6#14	17
Maela	6731_4#6	24
Maela	6755_4#2	37
Maela	6755_4#3	16
Maela	6755_6#1	37
Maela	6805_7#7	124
Maela	6871_2#13	124
Maela	6983_2#24	30
Maela	7011_6#3	63
Maela	7004_7#62	63
Maela	7068_4#6	17
Maela	6823_1#7	197
Maela	7054_5#2	150
Maela	7054_6#15	24
Maela	6755_5#5	184
Maela	6736_4#23	184
Maela	6736_8#3	184
Maela	6840_3#16	557
Maela	6823_2#20	16
Maela	6938_3#22	557
Maela	6823_4#12	557
Maela	6823_5#24	557
Maela	6938_3#24	29
Maela	6899_7#17	557
Maela	6983_5#17	557
Maela	6731_1#14	11
Maela	6807_1#4	86
Maela	6807_2#12	86
Maela	6736_5#2	152
Maela	6710_6#1	152
Maela	6805_2#17	152
Maela	6753_3#16	457
Maela	6823_3#12	457
Maela	6899_7#21	457
Maela	6983_6#26	32
Maela	6949_1#22	457
Maela	6972_5#1	457
Maela	7011_6#4	33
Maela	7004_7#57	457
Maela	6736_6#20	88
Maela	6841_7#21	499
Maela	6805_2#20	127
Maela	6680_7#20	17
Maela	6731_4#17	32
Maela	6736_7#6	213
Maela	6710_7#4	213
Maela	6840_1#2	213
Maela	6899_4#6	46
Maela	6983_7#53	31
Maela	6925_8#24	29
Maela	6938_5#10	58
Maela	7011_3#2	58
Maela	7011_3#3	29
Maela	7004_6#25	134
Maela	7004_8#83	60
Maela	7038_6#8	60
Maela	7054_4#23	134
Maela	7068_4#4	134
Maela	6755_5#23	63
Maela	6731_2#18	92
Maela	6755_4#1	92
Maela	6736_4#8	92
Maela	6925_6#4	305
Maela	6949_4#17	61
Maela	7038_4#18	32
Maela	6899_4#15	182
Maela	6899_6#19	182
Maela	6731_4#3	32
Maela	6736_6#9	29
Maela	6805_7#20	154
Maela	6871_2#18	154
Maela	6983_6#41	228
Maela	6949_2#14	228
Maela	6925_8#19	228
Maela	6938_5#3	228
Maela	6938_8#23	228
Maela	7011_6#21	228
Maela	7004_8#78	228
Maela	7054_4#14	46
Maela	6925_4#1	31
Maela	6925_3#18	99
Maela	7011_4#3	236
Maela	7011_4#4	66
Maela	7011_5#4	66
Maela	7011_6#8	66
Maela	6755_6#21	242
Maela	6823_5#3	46
Maela	6736_5#14	365
Maela	6823_7#11	30
Maela	7038_8#28	365
Maela	6983_6#39	152
Maela	6925_8#6	152
Maela	6972_5#19	152
Maela	6938_8#17	152
Maela	7038_5#20	62
Maela	7054_4#13	62
Maela	7068_4#7	15
Maela	7054_5#19	76
Maela	7054_6#14	76
Maela	6753_1#5	213
Maela	6925_6#3	242
Maela	6710_8#17	94
Maela	6807_2#23	94
Maela	6805_5#23	62
Maela	6871_1#6	62
Maela	6983_8#93	89
Maela	6949_4#19	89
Maela	6972_3#9	89
Maela	7004_5#8	60
Maela	7004_8#93	60
Maela	7038_6#17	30
Maela	6710_7#14	90
Maela	6753_1#7	90
Maela	6938_5#8	31
Maela	7011_3#7	166
Maela	7004_6#27	166
Maela	7004_8#82	166
[truncated: 255 more rows]
