# Supplementary material for: Genome-wide identification of lineage and locus specific variation associated with pneumococcal carriage duration
Source: eLife journal article supplement (doi:10.7554/elife.26255), 2017-07-25
Supplement: supp [file elife-26255-supp-v1.zip › elife_poa_e26255_Figure_3_source_data_2.txt]

6710_6_17	6710_6_17	0.524467628193
6710_6_18	6710_6_18	0.932361371525
6710_6_19	6710_6_19	-2.32463966951
6710_6_1	6710_6_1	0.32183509605
6710_6_21	6710_6_21	0.570971793519
6710_6_22	6710_6_22	-0.615494371051
6710_6_2	6710_6_2	-0.499457710908
6259_8_3	6259_8_3	-1.16631673256
6710_6_3	6710_6_3	-0.119454105598
6710_6_8	6710_6_8	0.642338291876
6710_7_11	6710_7_11	1.22056531305
6259_8_4	6259_8_4	0.616621894106
6710_7_13	6710_7_13	-0.202648146783
6710_7_14	6710_7_14	-0.183734596028
6710_7_16	6710_7_16	-0.0404222349827
6710_7_17	6710_7_17	1.95074908811
6710_7_18	6710_7_18	-0.486303603396
6710_7_1	6710_7_1	0.584100205163
6710_7_20	6710_7_20	0.386542619829
6710_7_21	6710_7_21	0.892007889083
6259_8_5	6259_8_5	0.285121430859
6710_7_24	6710_7_24	-1.13047876464
6710_7_2	6710_7_2	0.53784387282
6710_7_4	6710_7_4	0.730336849499
6710_7_7	6710_7_7	0.0762737853495
6710_7_8	6710_7_8	1.24123743274
6710_7_9	6710_7_9	-1.16631673256
6710_8_11	6710_8_11	1.088148818
6710_8_12	6710_8_12	-1.16631673256
6710_8_13	6710_8_13	-1.16631673256
6710_8_15	6710_8_15	-0.51287255695
6710_8_17	6710_8_17	-0.146662921195
6710_8_18	6710_8_18	-0.212207877764
6710_8_19	6710_8_19	-1.06344848899
6710_8_22	6710_8_22	0.845134367183
6710_8_23	6710_8_23	0.33636497946
6710_8_3	6710_8_3	-0.473395908982
6259_8_8	6259_8_8	-2.05800585579
6710_8_5	6710_8_5	-1.83085642029
6710_8_6	6710_8_6	-1.90259707374
6710_8_7	6710_8_7	-1.16631673256
6710_8_8	6710_8_8	0.570971793519
6710_8_9	6710_8_9	0.53784387282
6731_3_10	6731_3_10	0.421759481051
6731_3_11	6731_3_11	-0.0233243964907
6731_3_12	6731_3_12	0.0353617486593
6731_3_13	6731_3_13	0.0843627749714
6731_3_14	6731_3_14	0.903599048832
6259_8_9	6259_8_9	0.194624887928
6731_3_16	6731_3_16	0.132279977173
6731_3_17	6731_3_17	-0.137539793479
6731_3_18	6731_3_18	1.0609478791
6731_3_19	6731_3_19	-0.460721184657
6731_3_1	6731_3_1	1.5183030488
6731_3_20	6731_3_20	-1.13047876464
6731_3_21	6731_3_21	0.0762737853495
6731_3_22	6731_3_22	-0.473395908982
6731_3_24	6731_3_24	1.11509991433
6731_3_2	6731_3_2	0.557773673228
6731_3_3	6731_3_3	-0.526563407326
6731_3_4	6731_3_4	0.53784387282
6731_3_5	6731_3_5	-0.71952621221
6731_3_6	6731_3_6	-1.9782355064
6731_3_7	6731_3_7	1.96824209374
6731_3_8	6731_3_8	-0.165078869845
6731_3_9	6731_3_9	-1.09622063627
6593_4_11	6593_4_11	-1.20383423147
6736_4_11	6736_4_11	-1.00201398173
6736_4_12	6736_4_12	0.463359908603
6736_4_13	6736_4_13	-0.51287255695
6736_4_14	6736_4_14	0.0924217167609
6736_4_15	6736_4_15	-1.20383423147
6736_4_16	6736_4_16	0.761043037617
6736_4_18	6736_4_18	-0.436020963047
6736_4_19	6736_4_19	-0.110488208671
6736_4_1	6736_4_1	-1.09622063627
6593_4_12	6593_4_12	-0.71952621221
6736_4_20	6736_4_20	-1.16631673256
6736_4_22	6736_4_22	-0.569460070919
6736_4_23	6736_4_23	0.544504969802
6736_4_24	6736_4_24	0.705504071902
6736_4_3	6736_4_3	0.0762737853495
6736_4_5	6736_4_5	1.23608188981
6593_4_13	6593_4_13	-1.9782355064
6736_4_7	6736_4_7	-0.526563407326
6736_4_8	6736_4_8	-0.165078869845
6736_4_9	6736_4_9	-1.24313711701
6736_5_10	6736_5_10	0.0600038587718
6736_5_11	6736_5_11	-1.20383423147
6736_5_12	6736_5_12	-0.165078869845
6736_5_13	6736_5_13	-0.51287255695
6736_5_15	6736_5_15	-1.00201398173
6736_5_16	6736_5_16	-0.615494371051
6593_4_14	6593_4_14	-0.0404222349827
6736_5_17	6736_5_17	0.0681543022461
6736_5_19	6736_5_19	1.68660855232
6736_5_1	6736_5_1	0.903599048832
6736_5_20	6736_5_20	0.0518219654015
6736_5_21	6736_5_21	0.642338291876
6736_5_23	6736_5_23	-0.436020963047
6736_5_24	6736_5_24	1.088148818
6736_5_2	6736_5_2	0.32183509605
6736_5_3	6736_5_3	0.100451036435
6736_5_5	6736_5_5	-0.738753733943
6736_5_6	6736_5_6	0.124365246139
6736_5_7	6736_5_7	-0.499457710908
6736_5_8	6736_5_8	-0.499457710908
6736_5_9	6736_5_9	1.85812437322
6736_6_10	6736_6_10	0.915140616534
6736_6_11	6736_6_11	0.32183509605
6736_6_13	6736_6_13	-1.42055513091
6736_6_14	6736_6_14	1.40706852746
6736_6_15	6736_6_15	0.724151255025
6736_6_16	6736_6_16	1.07729888802
6736_6_17	6736_6_17	-1.20383423147
6736_6_18	6736_6_18	-0.241332939469
6736_6_1	6736_6_1	1.26689277727
6736_6_20	6736_6_20	-0.202648146783
6593_4_17	6593_4_17	-0.0318538980692
6736_6_23	6736_6_23	0.524467628193
6736_6_2	6736_6_2	1.07185876738
6736_6_8	6736_6_8	0.0270823191504
6593_4_18	6593_4_18	-0.738753733943
6736_6_9	6736_6_9	-1.20383423147
6736_7_11	6736_7_11	-1.09622063627
6736_7_12	6736_7_12	-0.083880240245
6736_7_13	6736_7_13	1.07729888802
6736_7_14	6736_7_14	0.0518219654015
6736_7_16	6736_7_16	0.171443747828
6736_7_17	6736_7_17	0.655098440363
6736_7_1	6736_7_1	0.314537145017
6736_7_20	6736_7_20	0.0681543022461
6736_7_22	6736_7_22	0.730336849499
6736_7_23	6736_7_23	-1.24313711701
6736_7_24	6736_7_24	0.386542619829
6736_7_3	6736_7_3	0.0681543022461
6736_7_4	6736_7_4	0.827340968431
6593_4_1	6593_4_1	-0.51287255695
6736_7_6	6736_7_6	0.730336849499
6736_7_7	6736_7_7	-2.52792898296
6736_7_8	6736_7_8	-0.51287255695
6736_8_10	6736_8_10	1.01132963821
6736_8_13	6736_8_13	0.570971793519
6736_8_14	6736_8_14	1.24123743274
6736_8_16	6736_8_16	0.0843627749714
6736_8_17	6736_8_17	0.0843627749714
6736_8_18	6736_8_18	-1.03207398046
6736_8_19	6736_8_19	0.0270823191504
6736_8_1	6736_8_1	-0.34436106915
6736_8_21	6736_8_21	0.470225132493
6736_8_23	6736_8_23	-1.28433775448
6593_4_21	6593_4_21	-1.16631673256
6259_5_10	6259_5_10	-0.71952621221
6736_8_2	6736_8_2	1.24638474416
6736_8_3	6736_8_3	0.544504969802
6736_8_4	6736_8_4	-0.137539793479
6736_8_5	6736_8_5	-1.06344848899
6736_8_6	6736_8_6	-1.20383423147
6736_8_7	6736_8_7	-1.24313711701
6736_8_8	6736_8_8	0.754931062421
6736_8_9	6736_8_9	2.53482445592
6753_1_10	6753_1_10	0.915140616534
6593_4_22	6593_4_22	0.0924217167609
6753_1_13	6753_1_13	0.0187692239672
6753_1_14	6753_1_14	0.209951362583
6753_1_15	6753_1_15	0.892007889083
6753_1_16	6753_1_16	0.307216971162
6753_1_17	6753_1_17	0.53784387282
6753_1_18	6753_1_18	0.711734960929
6753_1_1	6753_1_1	-2.63813613567
6593_4_23	6593_4_23	-0.71952621221
6753_1_20	6753_1_20	0.497495746536
6753_1_21	6753_1_21	0.0843627749714
6753_1_22	6753_1_22	0.194624887928
6753_1_23	6753_1_23	-0.193157927511
6753_1_2	6753_1_2	0.171443747828
6753_1_3	6753_1_3	0.909375991796
6753_1_4	6753_1_4	1.23608188981
6753_1_5	6753_1_5	0.730336849499
6593_4_24	6593_4_24	-0.333565724504
6753_1_7	6753_1_7	-0.183734596028
6753_1_8	6753_1_8	0.711734960929
6753_1_9	6753_1_9	0.705504071902
6753_2_10	6753_2_10	0.524467628193
6753_2_13	6753_2_13	-1.16631673256
6753_2_14	6753_2_14	1.32766640352
6753_2_16	6753_2_16	-1.16631673256
6593_4_2	6593_4_2	-0.423972518253
6753_2_17	6753_2_17	1.96824209374
6753_2_18	6753_2_18	0.0843627749714
6753_2_19	6753_2_19	-0.423972518253
6753_2_1	6753_2_1	0.570971793519
6753_2_21	6753_2_21	-1.24313711701
6753_2_4	6753_2_4	0.903599048832
6753_2_5	6753_2_5	0.0843627749714
6753_2_6	6753_2_6	-1.13047876464
6753_2_8	6753_2_8	0.32183509605
6753_3_10	6753_3_10	-1.13047876464
6753_3_11	6753_3_11	0.314537145017
6753_3_12	6753_3_12	-0.212207877764
6753_3_13	6753_3_13	-1.09622063627
6753_3_14	6753_3_14	0.100451036435
6753_3_15	6753_3_15	-1.16631673256
6753_3_16	6753_3_16	1.95950126064
6753_3_17	6753_3_17	0.909375991796
6753_3_19	6753_3_19	0.140166955981
6753_3_21	6753_3_21	0.0518219654015
6753_3_22	6753_3_22	0.544504969802
6593_4_5	6593_4_5	-1.24313711701
6753_3_23	6753_3_23	-0.400426790279
6753_3_24	6753_3_24	0.742663402909
6753_3_2	6753_3_2	-0.155841967806
6753_3_3	6753_3_3	1.66821503734
6753_3_4	6753_3_4	2.20897596194
6753_3_5	6753_3_5	-0.17437568418
6753_3_6	6753_3_6	-0.486303603396
6753_3_9	6753_3_9	-1.06344848899
6753_4_10	6753_4_10	0.797414650799
6753_4_11	6753_4_11	1.61725641002
6753_4_12	6753_4_12	0.597159771013
6753_4_13	6753_4_13	0.32183509605
6753_4_14	6753_4_14	0.32183509605
6753_4_16	6753_4_16	1.52782829464
6753_4_17	6753_4_17	1.68660855232
6753_4_19	6753_4_19	-0.499457710908
6753_4_1	6753_4_1	-1.13047876464
6753_4_20	6753_4_20	0.724151255025
6753_4_21	6753_4_21	0.524467628193
6753_4_22	6753_4_22	0.909375991796
6753_4_23	6753_4_23	-1.83085642029
6753_4_24	6753_4_24	0.329110987479
6753_4_2	6753_4_2	-0.893423176708
6753_4_3	6753_4_3	1.33268197952
6753_4_4	6753_4_4	1.82246294229
6753_4_5	6753_4_5	-1.13047876464
6753_4_6	6753_4_6	0.0681543022461
6753_4_7	6753_4_7	1.24123743274
6753_4_9	6753_4_9	-0.499457710908
6755_1_10	6755_1_10	1.15772224686
6755_1_11	6755_1_11	-1.09622063627
6755_1_13	6755_1_13	-1.9782355064
6593_4_9	6593_4_9	-0.738753733943
6755_1_17	6755_1_17	-0.436020963047
6755_1_3	6755_1_3	0.544504969802
6755_1_5	6755_1_5	-1.09622063627
6755_1_6	6755_1_6	1.5420747629
6755_1_7	6755_1_7	-0.155841967806
6755_1_8	6755_1_8	-0.366348141631
6755_2_10	6755_2_10	0.357997117714
6755_2_11	6755_2_11	0.839216566658
6593_5_11	6593_5_11	0.551148199531
6755_2_12	6755_2_12	0.53784387282
6755_2_14	6755_2_14	-0.665272168126
6755_2_15	6755_2_15	-1.42055513091
6755_2_16	6755_2_16	-0.146662921195
6755_2_18	6755_2_18	-1.9782355064
6755_2_19	6755_2_19	2.47279665331
6755_2_21	6755_2_21	-0.301898160894
6755_2_2	6755_2_2	0.773223735798
6755_2_3	6755_2_3	-0.868851794054
6755_2_4	6755_2_4	-0.486303603396
6755_2_5	6755_2_5	-1.09622063627
6755_2_6	6755_2_6	-0.322893996341
6755_2_7	6755_2_7	-0.473395908982
6593_5_13	6593_5_13	-0.0490303185016
6755_2_8	6755_2_8	-0.648221271109
6755_2_9	6755_2_9	-0.155841967806
6755_3_10	6755_3_10	-1.16631673256
6755_3_11	6755_3_11	1.24123743274
6755_3_12	6755_3_12	-1.03207398046
6755_3_13	6755_3_13	-2.75448641136
6755_3_17	6755_3_17	1.088148818
6755_3_18	6755_3_18	-1.06344848899
6755_3_19	6755_3_19	1.7865753776
6755_3_20	6755_3_20	-1.09622063627
6755_3_23	6755_3_23	0.915140616534
6755_3_24	6755_3_24	0.748804548145
6755_3_2	6755_3_2	-1.09622063627
6755_3_3	6755_3_3	-1.32755537863
6593_5_15	6593_5_15	0.285121430859
6755_3_4	6755_3_4	1.02796512606
6755_3_5	6755_3_5	-1.06344848899
6755_3_9	6755_3_9	-0.17437568418
6755_4_10	6755_4_10	0.711734960929
6755_4_11	6755_4_11	1.16300814432
6755_4_12	6755_4_12	1.07729888802
6755_4_15	6755_4_15	-0.51287255695
6755_4_16	6755_4_16	-0.71952621221
6755_4_17	6755_4_17	0.100451036435
6755_4_18	6755_4_18	-1.09622063627
6755_4_19	6755_4_19	-0.71952621221
6755_4_1	6755_4_1	-0.165078869845
6755_4_21	6755_4_21	0.0353617486593
6755_4_23	6755_4_23	0.108451141002
6755_4_2	6755_4_2	-0.945529345245
6755_4_3	6755_4_3	-1.90259707374
6755_4_4	6755_4_4	-0.17437568418
6755_4_5	6755_4_5	1.23608188981
6755_4_8	6755_4_8	0.32183509605
6755_4_9	6755_4_9	-0.486303603396
6593_5_18	6593_5_18	0.897809707967
6755_5_12	6755_5_12	0.0762737853495
6755_5_13	6755_5_13	-1.13047876464
6755_5_16	6755_5_16	-1.09622063627
6755_5_17	6755_5_17	-0.473395908982
6755_5_18	6755_5_18	-0.202648146783
6755_5_19	6755_5_19	0.186923619432
6755_5_1	6755_5_1	0.0924217167609
6755_5_20	6755_5_20	1.85812437322
6755_5_22	6755_5_22	-0.29156331694
6755_5_23	6755_5_23	-0.473395908982
6755_5_24	6755_5_24	-0.486303603396
6755_5_2	6755_5_2	-1.16631673256
6755_5_5	6755_5_5	0.544504969802
6755_5_6	6755_5_6	-0.499457710908
6755_5_7	6755_5_7	-1.16631673256
6755_5_9	6755_5_9	-0.499457710908
6755_6_10	6755_6_10	0.897809707967
6755_6_12	6755_6_12	-0.183734596028
6755_6_13	6755_6_13	0.314537145017
6755_6_14	6755_6_14	1.07185876738
6755_6_15	6755_6_15	0.724151255025
6593_5_20	6593_5_20	-0.183734596028
6755_6_17	6755_6_17	0.0762737853495
6755_6_1	6755_6_1	-0.945529345245
6755_6_20	6755_6_20	-0.700892960429
6755_6_21	6755_6_21	0.903599048832
6755_6_2	6755_6_2	1.68660855232
6755_6_3	6755_6_3	0.915140616534
6755_6_4	6755_6_4	0.724151255025
6755_6_5	6755_6_5	1.22056531305
6755_6_7	6755_6_7	0.524467628193
6755_6_8	6755_6_8	-0.499457710908
6775_2_10	6775_2_10	-1.16631673256
6775_2_11	6775_2_11	0.414756709987
6775_2_12	6775_2_12	0.544504969802
6593_5_22	6593_5_22	-2.05800585579
6775_2_13	6775_2_13	0.862808788925
6775_2_14	6775_2_14	1.00018464141
6775_2_15	6775_2_15	0.736507534325
6775_2_16	6775_2_16	-1.90259707374
6775_2_1	6775_2_1	0.329110987479
6775_2_21	6775_2_21	-0.51287255695
6775_2_24	6775_2_24	1.76402500267
6775_2_3	6775_2_3	-0.0233243964907
6775_2_4	6775_2_4	1.088148818
6775_2_5	6775_2_5	-0.540546529875
6775_2_7	6775_2_7	-0.499457710908
6593_5_24	6593_5_24	-1.16631673256
6775_2_9	6775_2_9	0.909375991796
6775_1_10	6775_1_10	1.22056531305
6775_1_11	6775_1_11	-0.155841967806
6775_1_12	6775_1_12	0.773223735798
6775_1_15	6775_1_15	-1.63685761567
6775_1_18	6775_1_18	0.357997117714
6593_5_2	6593_5_2	0.307216971162
6775_1_19	6775_1_19	-1.9782355064
6775_1_22	6775_1_22	0.903599048832
6775_1_23	6775_1_23	1.088148818
6775_1_2	6775_1_2	-2.05800585579
6775_1_3	6775_1_3	1.00018464141
6775_1_5	6775_1_5	-2.05800585579
6775_1_6	6775_1_6	-0.301898160894
6775_1_7	6775_1_7	0.892007889083
6775_1_8	6775_1_8	0.32183509605
6805_2_10	6805_2_10	-1.16631673256
6805_2_11	6805_2_11	-1.13047876464
6805_2_12	6805_2_12	-0.00637849527696
6805_2_14	6805_2_14	-0.119454105598
6593_5_4	6593_5_4	1.088148818
6805_2_15	6805_2_15	1.54681269781
6805_2_16	6805_2_16	-1.16631673256
6805_2_17	6805_2_17	0.32183509605
6805_2_19	6805_2_19	0.100451036435
6805_2_1	6805_2_1	0.470225132493
6805_2_20	6805_2_20	0.132279977173
6805_2_21	6805_2_21	0.307216971162
6805_2_23	6805_2_23	-1.20383423147
6805_2_24	6805_2_24	-1.03207398046
6805_2_2	6805_2_2	0.307216971162
6805_2_3	6805_2_3	-0.51287255695
6805_2_5	6805_2_5	-0.486303603396
6805_2_6	6805_2_6	-0.460721184657
6805_2_7	6805_2_7	2.20897596194
6805_2_9	6805_2_9	-0.473395908982
6805_3_10	6805_3_10	1.45582776377
6805_3_12	6805_3_12	-0.526563407326
6805_3_13	6805_3_13	-0.0490303185016
6805_3_14	6805_3_14	-1.13047876464
6805_3_16	6805_3_16	0.307216971162
6805_3_17	6805_3_17	-0.0751029632051
6805_3_18	6805_3_18	0.915140616534
6805_3_19	6805_3_19	0.0518219654015
6593_5_7	6593_5_7	-0.183734596028
6805_3_20	6805_3_20	-0.738753733943
6805_3_21	6805_3_21	0.0762737853495
6805_3_22	6805_3_22	0.0762737853495
6805_3_23	6805_3_23	1.24123743274
6805_3_2	6805_3_2	-0.17437568418
6805_3_3	6805_3_3	-0.526563407326
6805_3_4	6805_3_4	0.0518219654015
6805_3_5	6805_3_5	0.531164796565
6805_3_6	6805_3_6	0.773223735798
6805_3_7	6805_3_7	-0.377553687055
6805_3_8	6805_3_8	-1.00201398173
6805_4_10	6805_4_10	2.91083911855
6805_4_11	6805_4_11	1.52782829464
6805_4_13	6805_4_13	0.584100205163
6805_4_14	6805_4_14	0.724151255025
6805_4_15	6805_4_15	-0.460721184657
6805_4_16	6805_4_16	1.68660855232
6630_1_10	6630_1_10	-0.165078869845
6805_4_17	6805_4_17	1.54681269781
6805_4_18	6805_4_18	0.329110987479
6805_4_1	6805_4_1	-1.9782355064
6805_4_21	6805_4_21	-0.202648146783
6805_4_23	6805_4_23	-0.540546529875
6805_4_2	6805_4_2	0.711734960929
6805_4_3	6805_4_3	-1.09622063627
6805_4_6	6805_4_6	-1.09622063627
6805_4_8	6805_4_8	0.909375991796
6805_4_9	6805_4_9	0.915140616534
6805_5_12	6805_5_12	-0.146662921195
6805_5_14	6805_5_14	0.140166955981
6805_5_16	6805_5_16	0.903599048832
6805_5_17	6805_5_17	-0.945529345245
6805_5_19	6805_5_19	0.307216971162
6805_5_1	6805_5_1	-1.16631673256
6805_5_20	6805_5_20	1.68660855232
6805_5_21	6805_5_21	0.0924217167609
6805_5_23	6805_5_23	-0.486303603396
6805_5_2	6805_5_2	-1.16631673256
6805_5_3	6805_5_3	0.0762737853495
6805_5_4	6805_5_4	0.0187692239672
6630_1_13	6630_1_13	-1.24313711701
6805_5_5	6805_5_5	0.0843627749714
6805_5_6	6805_5_6	-1.24313711701
6805_5_7	6805_5_7	0.92089300228
6805_5_9	6805_5_9	-0.499457710908
6805_6_10	6805_6_10	0.53784387282
6805_6_13	6805_6_13	0.155858961397
6805_6_14	6805_6_14	0.897809707967
6805_6_15	6805_6_15	-0.473395908982
6805_6_16	6805_6_16	0.92089300228
6805_6_17	6805_6_17	-0.499457710908
6805_6_21	6805_6_21	-1.24313711701
6805_6_23	6805_6_23	-0.460721184657
6805_6_24	6805_6_24	0.343597229252
6630_1_15	6630_1_15	0.635933857773
6805_6_2	6805_6_2	1.07729888802
6805_6_3	6805_6_3	1.09355876042
6805_6_5	6805_6_5	-0.822384967224
6805_6_6	6805_6_6	0.779292640056
6805_7_12	6805_7_12	-1.24313711701
6805_7_13	6805_7_13	1.33268197952
6805_7_15	6805_7_15	0.108451141002
6805_7_16	6805_7_16	0.909375991796
6805_7_1	6805_7_1	-0.137539793479
6805_7_20	6805_7_20	0.33636497946
6630_1_17	6630_1_17	-0.499457710908
6805_7_21	6805_7_21	-1.16631673256
6805_7_22	6805_7_22	0.748804548145
6805_7_2	6805_7_2	0.730336849499
6805_7_3	6805_7_3	-0.146662921195
6805_7_4	6805_7_4	-1.03207398046
6805_7_6	6805_7_6	1.85812437322
6805_7_7	6805_7_7	0.108451141002
6630_1_18	6630_1_18	-1.16631673256
6805_7_9	6805_7_9	-0.945529345245
6807_1_10	6807_1_10	-1.52324219299
6807_1_12	6807_1_12	-0.51287255695
6807_1_14	6807_1_14	-1.32755537863
6807_1_17	6807_1_17	-0.183734596028
6807_1_18	6807_1_18	0.329110987479
6807_1_19	6807_1_19	0.53784387282
6807_1_1	6807_1_1	1.32766640352
6807_1_21	6807_1_21	0.194624887928
6807_1_22	6807_1_22	-0.51287255695
6807_1_24	6807_1_24	-2.05800585579
6807_1_3	6807_1_3	1.43152756221
6807_1_4	6807_1_4	-0.221839910514
6807_1_6	6807_1_6	0.357997117714
6807_1_7	6807_1_7	-0.631637682688
6807_1_8	6807_1_8	0.915140616534
6807_1_9	6807_1_9	0.773223735798
6807_2_12	6807_2_12	-0.221839910514
6807_2_14	6807_2_14	0.92089300228
6630_1_20	6630_1_20	0.2327544952
6807_2_15	6807_2_15	-0.128470760933
6807_2_16	6807_2_16	0.53784387282
6807_2_18	6807_2_18	1.82246294229
6807_2_3	6807_2_3	0.642338291876
6807_2_4	6807_2_4	0.357997117714
6807_2_6	6807_2_6	0.761043037617
6807_2_7	6807_2_7	1.5420747629
6807_2_8	6807_2_8	-1.16631673256
6807_2_9	6807_2_9	-0.400426790279
6807_3_12	6807_3_12	0.779292640056
6807_3_15	6807_3_15	-1.90259707374
6807_3_16	6807_3_16	0.524467628193
6807_3_19	6807_3_19	2.20897596194
6807_3_1	6807_3_1	1.67742064619
6807_3_20	6807_3_20	0.299874408036
6807_3_21	6807_3_21	0.140166955981
6807_3_23	6807_3_23	0.717950656982
6807_3_2	6807_3_2	-1.63685761567
6807_3_3	6807_3_3	0.915140616534
6807_3_4	6807_3_4	-0.51287255695
6807_3_5	6807_3_5	-0.973190288377
6807_3_6	6807_3_6	0.262819676625
6807_3_7	6807_3_7	0.724151255025
6807_3_8	6807_3_8	-1.16631673256
6830_3_10	6830_3_10	-1.28433775448
6830_3_1	6830_3_1	0.343597229252
6830_3_13	6830_3_13	0.742663402909
6830_3_18	6830_3_18	0.544504969802
6830_3_21	6830_3_21	-0.973190288377
6830_3_23	6830_3_23	0.724151255025
6830_3_24	6830_3_24	1.85812437322
6830_3_3	6830_3_3	-1.47061351009
6630_1_3	6630_1_3	0.24030668839
6830_3_4	6830_3_4	0.926633227825
6830_3_5	6830_3_5	0.116422419914
6830_3_6	6830_3_6	1.41197330507
6830_3_8	6830_3_8	-0.473395908982
6840_1_10	6840_1_10	-0.486303603396
6840_1_11	6840_1_11	2.15371067684
6840_1_1	6840_1_1	0.524467628193
6630_1_4	6630_1_4	-0.51287255695
6840_1_13	6840_1_13	1.5183030488
6840_1_14	6840_1_14	-0.822384967224
6840_1_15	6840_1_15	1.27199975505
6840_1_16	6840_1_16	-0.460721184657
6840_1_18	6840_1_18	-0.499457710908
6840_1_20	6840_1_20	2.53482445592
6840_1_21	6840_1_21	0.0843627749714
6840_1_2	6840_1_2	0.730336849499
6630_1_5	6630_1_5	-1.9782355064
6840_1_22	6840_1_22	0.903599048832
6840_1_3	6840_1_3	0.584100205163
6840_1_4	6840_1_4	-0.183734596028
6840_1_5	6840_1_5	-0.868851794054
6840_1_7	6840_1_7	-0.155841967806
6840_1_9	6840_1_9	1.61725641002
6630_1_6	6630_1_6	0.314537145017
6840_3_10	6840_3_10	-0.0663696341703
6840_3_11	6840_3_11	0.477071207278
6840_3_1	6840_3_1	1.7865753776
6840_3_12	6840_3_12	-0.486303603396
6840_3_15	6840_3_15	-0.165078869845
6840_3_16	6840_3_16	2.38550108547
6840_3_18	6840_3_18	0.343597229252
6840_3_20	6840_3_20	-1.09622063627
6840_3_2	6840_3_2	-0.499457710908
6840_3_22	6840_3_22	0.61015134278
6840_3_23	6840_3_23	-0.973190288377
6840_3_24	6840_3_24	1.41197330507
6840_3_3	6840_3_3	-1.16631673256
6840_3_4	6840_3_4	1.16300814432
6630_1_8	6630_1_8	0.943781724617
6840_3_6	6840_3_6	0.477071207278
6840_3_8	6840_3_8	2.25549042886
6841_7_10	6841_7_10	-1.03207398046
6841_7_11	6841_7_11	-0.822384967224
6841_7_16	6841_7_16	-0.400426790279
6841_7_17	6841_7_17	0.0762737853495
6841_7_18	6841_7_18	0.915140616534
6841_7_19	6841_7_19	-1.20383423147
6841_7_20	6841_7_20	-0.183734596028
6841_7_21	6841_7_21	2.14090897401
6841_7_22	6841_7_22	-1.16631673256
6841_7_24	6841_7_24	0.531164796565
6841_7_5	6841_7_5	0.903599048832
6841_7_6	6841_7_6	1.32766640352
6841_7_8	6841_7_8	0.909375991796
6841_7_9	6841_7_9	1.26689277727
6630_2_11	6630_2_11	-1.90259707374
6871_1_1	6871_1_1	1.24123743274
6871_1_13	6871_1_13	-0.569460070919
6871_1_14	6871_1_14	0.132279977173
6871_1_16	6871_1_16	1.96824209374
6871_1_17	6871_1_17	0.100451036435
6871_1_18	6871_1_18	0.108451141002
6630_2_12	6630_2_12	1.15772224686
6871_1_2	6871_1_2	-1.20383423147
6871_1_22	6871_1_22	0.926633227825
6871_1_23	6871_1_23	-1.16631673256
6871_1_3	6871_1_3	0.0924217167609
6871_1_4	6871_1_4	0.329110987479
6871_1_5	6871_1_5	0.314537145017
6871_1_6	6871_1_6	-0.486303603396
6871_1_7	6871_1_7	1.68660855232
6630_2_13	6630_2_13	0.730336849499
6871_1_8	6871_1_8	1.088148818
6871_1_9	6871_1_9	0.0924217167609
6871_2_1	6871_2_1	-1.16631673256
6871_2_13	6871_2_13	0.108451141002
6871_2_14	6871_2_14	0.909375991796
6871_2_15	6871_2_15	0.597159771013
6630_2_14	6630_2_14	0.0924217167609
6871_2_19	6871_2_19	0.285121430859
6871_2_20	6871_2_20	1.68660855232
6871_2_21	6871_2_21	-1.09622063627
6871_2_2	6871_2_2	-1.13047876464
6871_2_3	6871_2_3	0.314537145017
6630_2_15	6630_2_15	-0.165078869845
6871_2_5	6871_2_5	2.02479197659
6871_2_6	6871_2_6	0.0681543022461
6871_2_8	6871_2_8	1.22056531305
6871_2_9	6871_2_9	-0.499457710908
6899_4_11	6899_4_11	0.32183509605
6899_4_1	6899_4_1	0.730336849499
6899_4_12	6899_4_12	-0.165078869845
6899_4_14	6899_4_14	-0.241332939469
6899_4_15	6899_4_15	0.531164796565
6899_4_16	6899_4_16	-0.51287255695
6899_4_18	6899_4_18	0.53784387282
6899_4_19	6899_4_19	0.785347367784
6899_4_20	6899_4_20	-1.09622063627
6899_4_21	6899_4_21	0.329110987479
6899_4_2	6899_4_2	0.155858961397
6630_2_17	6630_2_17	0.655098440363
6899_4_24	6899_4_24	0.880366494552
6899_4_3	6899_4_3	-0.322893996341
6899_4_4	6899_4_4	0.32183509605
6899_4_5	6899_4_5	0.155858961397
6899_4_6	6899_4_6	-0.738753733943
6899_4_7	6899_4_7	-0.75861259618
6899_4_8	6899_4_8	0.209951362583
6899_4_9	6899_4_9	1.0609478791
6899_5_10	6899_5_10	0.329110987479
6630_2_18	6630_2_18	-0.322893996341
6899_5_11	6899_5_11	-1.47061351009
6899_5_1	6899_5_1	1.24638474416
6899_5_13	6899_5_13	-0.499457710908
6899_5_14	6899_5_14	-1.47061351009
6899_5_17	6899_5_17	0.100451036435
6899_5_18	6899_5_18	0.194624887928
6899_5_19	6899_5_19	-1.90259707374
6899_5_20	6899_5_20	1.63585235765
6899_5_21	6899_5_21	-0.893423176708
6899_5_22	6899_5_22	-1.42055513091
6899_5_23	6899_5_23	-1.63685761567
6899_5_24	6899_5_24	1.80454823181
6899_5_3	6899_5_3	-0.631637682688
6899_5_4	6899_5_4	0.32183509605
6899_5_5	6899_5_5	-1.24313711701
6899_5_6	6899_5_6	-0.17437568418
6630_2_1	6630_2_1	-1.16631673256
6899_5_7	6899_5_7	0.209951362583
6899_5_8	6899_5_8	2.53482445592
6899_5_9	6899_5_9	0.32183509605
6899_6_10	6899_6_10	0.797414650799
6899_6_1	6899_6_1	-0.460721184657
6899_6_12	6899_6_12	1.68660855232
6899_6_13	6899_6_13	-0.460721184657
6899_6_14	6899_6_14	0.477071207278
6899_6_15	6899_6_15	-1.83085642029
6630_2_20	6630_2_20	1.088148818
6899_6_17	6899_6_17	0.892007889083
6899_6_18	6899_6_18	1.09355876042
6899_6_19	6899_6_19	0.531164796565
6899_6_20	6899_6_20	0.0600038587718
6899_6_21	6899_6_21	1.67742064619
6899_6_22	6899_6_22	-1.20383423147
6899_6_23	6899_6_23	0.0681543022461
6899_6_24	6899_6_24	0.773223735798
6899_6_3	6899_6_3	1.0609478791
6899_6_4	6899_6_4	0.329110987479
6899_6_6	6899_6_6	1.088148818
6899_6_7	6899_6_7	0.531164796565
6899_6_8	6899_6_8	-0.165078869845
6899_7_11	6899_7_11	-0.436020963047
6899_7_1	6899_7_1	-0.460721184657
6899_7_15	6899_7_15	0.108451141002
6899_7_16	6899_7_16	-1.06344848899
6899_7_17	6899_7_17	2.38550108547
6899_7_18	6899_7_18	-0.499457710908
6899_7_20	6899_7_20	1.24123743274
6899_7_21	6899_7_21	1.95950126064
6899_7_2	6899_7_2	-1.09622063627
6899_7_22	6899_7_22	0.742663402909
6899_7_24	6899_7_24	-0.460721184657
6899_7_3	6899_7_3	-0.355286311359
6899_7_4	6899_7_4	1.39723920228
6899_7_7	6899_7_7	-0.569460070919
6899_7_9	6899_7_9	0.717950656982
6630_2_24	6630_2_24	-0.128470760933
6925_3_10	6925_3_10	-0.486303603396
6925_3_11	6925_3_11	0.730336849499
6925_3_1	6925_3_1	-0.322893996341
6925_3_13	6925_3_13	0.285121430859
6925_3_14	6925_3_14	1.68660855232
6925_3_15	6925_3_15	-0.51287255695
6925_3_16	6925_3_16	-0.51287255695
6925_3_17	6925_3_17	-0.0404222349827
6925_3_18	6925_3_18	-0.101571544309
6630_2_2	6630_2_2	1.06640845358
6925_3_20	6925_3_20	1.63585235765
6925_3_2	6925_3_2	-0.322893996341
6925_3_23	6925_3_23	1.24123743274
6925_3_24	6925_3_24	-1.06344848899
6925_3_3	6925_3_3	-0.738753733943
6925_3_4	6925_3_4	0.544504969802
6925_3_5	6925_3_5	-2.32463966951
6925_3_6	6925_3_6	1.80454823181
6630_2_3	6630_2_3	-0.631637682688
6925_3_7	6925_3_7	-0.75861259618
6925_3_8	6925_3_8	-0.083880240245
6925_3_9	6925_3_9	1.41687155278
6925_4_10	6925_4_10	-0.322893996341
6925_4_11	6925_4_11	1.61725641002
6925_4_1	6925_4_1	-1.13047876464
6925_4_12	6925_4_12	-1.9782355064
6925_4_15	6925_4_15	-0.448266815401
6925_4_16	6925_4_16	-0.460721184657
6925_4_17	6925_4_17	-1.16631673256
6925_4_18	6925_4_18	0.642338291876
6925_4_19	6925_4_19	0.32183509605
6925_4_20	6925_4_20	0.0681543022461
6925_4_2	6925_4_2	1.43152756221
6925_4_22	6925_4_22	-0.0318538980692
6925_4_23	6925_4_23	1.24123743274
6925_4_3	6925_4_3	0.32183509605
6630_2_5	6630_2_5	-0.486303603396
6925_4_4	6925_4_4	-0.473395908982
6925_4_5	6925_4_5	-1.20383423147
6925_4_6	6925_4_6	0.477071207278
6925_4_7	6925_4_7	-0.499457710908
6925_4_8	6925_4_8	0.915140616534
6925_5_1	6925_5_1	2.53482445592
6925_5_12	6925_5_12	-0.554839260088
6925_5_13	6925_5_13	1.40215717496
6925_5_14	6925_5_14	-1.20383423147
6925_5_16	6925_5_16	-1.09622063627
6925_5_18	6925_5_18	0.742663402909
6925_5_20	6925_5_20	0.292509285765
6925_5_21	6925_5_21	0.524467628193
6630_2_7	6630_2_7	0.0843627749714
6925_5_23	6925_5_23	1.24123743274
6925_5_24	6925_5_24	0.909375991796
6925_5_3	6925_5_3	-2.52792898296
6925_5_4	6925_5_4	-0.499457710908
6925_5_5	6925_5_5	0.983383695202
6925_5_6	6925_5_6	-0.71952621221
6925_5_8	6925_5_8	-0.51287255695
6925_5_9	6925_5_9	-1.90259707374
6925_6_10	6925_6_10	-0.322893996341
6925_6_12	6925_6_12	0.108451141002
6925_6_13	6925_6_13	2.53482445592
6925_6_14	6925_6_14	-0.0148328677886
6925_6_15	6925_6_15	-1.13047876464
6925_6_16	6925_6_16	0.32183509605
6925_6_18	6925_6_18	-0.251200449899
6630_2_9	6630_2_9	1.088148818
6925_6_19	6925_6_19	0.179196660456
6925_6_2	6925_6_2	0.299874408036
6925_6_22	6925_6_22	-0.51287255695
6925_6_23	6925_6_23	-0.00637849527696
6925_6_24	6925_6_24	-0.569460070919
6925_6_3	6925_6_3	0.903599048832
6925_6_4	6925_6_4	1.24638474416
6925_6_5	6925_6_5	1.37254843071
6925_6_6	6925_6_6	-0.322893996341
6925_6_8	6925_6_8	0.299874408036
6925_6_9	6925_6_9	-1.20383423147
6925_7_10	6925_7_10	0.0762737853495
6925_7_11	6925_7_11	1.41687155278
6925_7_1	6925_7_1	-0.569460070919
6925_7_12	6925_7_12	-0.554839260088
6925_7_13	6925_7_13	-0.128470760933
6925_7_14	6925_7_14	-1.13047876464
6630_3_11	6630_3_11	-0.322893996341
6925_7_15	6925_7_15	0.155858961397
6925_7_16	6925_7_16	-0.75861259618
6925_7_17	6925_7_17	0.909375991796
6925_7_18	6925_7_18	1.31761319564
6925_7_20	6925_7_20	1.24638474416
6925_7_2	6925_7_2	-0.146662921195
6925_7_22	6925_7_22	0.163664608989
6925_7_23	6925_7_23	-0.183734596028
6925_7_24	6925_7_24	-0.973190288377
6925_7_5	6925_7_5	0.642338291876
6925_7_6	6925_7_6	0.108451141002
6925_7_8	6925_7_8	-0.146662921195
6925_7_9	6925_7_9	-0.183734596028
6925_8_10	6925_8_10	0.0843627749714
6925_8_1	6925_8_1	1.61725641002
6925_8_12	6925_8_12	-0.333565724504
6925_8_13	6925_8_13	0.194624887928
6925_8_14	6925_8_14	-0.868851794054
6925_8_15	6925_8_15	-0.146662921195
6925_8_16	6925_8_16	-0.700892960429
6925_8_17	6925_8_17	-0.486303603396
6925_8_19	6925_8_19	0.821383000017
6925_8_20	6925_8_20	0.32183509605
6925_8_21	6925_8_21	1.54681269781
6925_8_2	6925_8_2	1.17355268748
6925_8_22	6925_8_22	-0.202648146783
6925_8_24	6925_8_24	-1.20383423147
6925_8_5	6925_8_5	0.108451141002
6925_8_6	6925_8_6	0.32183509605
6925_8_7	6925_8_7	-0.34436106915
6925_8_8	6925_8_8	-0.193157927511
6925_8_9	6925_8_9	-0.526563407326
6938_3_22	6938_3_22	2.38550108547
6938_3_23	6938_3_23	1.09355876042
6938_3_24	6938_3_24	-1.20383423147
6938_3_25	6938_3_25	-0.554839260088
6938_3_26	6938_3_26	0.815411470814
6938_3_27	6938_3_27	-0.554839260088
6938_3_28	6938_3_28	-1.16631673256
6938_3_29	6938_3_29	0.815411470814
6938_3_30	6938_3_30	-0.700892960429
6938_3_31	6938_3_31	0.815411470814
6938_3_32	6938_3_32	-0.75861259618
6938_3_33	6938_3_33	-0.700892960429
6938_3_34	6938_3_34	-1.37291646765
6938_3_35	6938_3_35	-0.738753733943
6938_3_36	6938_3_36	-0.71952621221
6938_5_10	6938_5_10	-0.540546529875
6630_3_17	6630_3_17	-1.13047876464
6938_5_11	6938_5_11	-1.13047876464
6938_5_1	6938_5_1	-1.76279144813
6938_5_12	6938_5_12	-0.700892960429
6938_5_13	6938_5_13	-0.183734596028
6938_5_14	6938_5_14	0.988995234618
6938_5_15	6938_5_15	0.100451036435
6938_5_16	6938_5_16	-0.0404222349827
6938_5_17	6938_5_17	2.15371067684
6938_5_18	6938_5_18	-1.16631673256
6938_5_19	6938_5_19	-0.738753733943
6630_3_18	6630_3_18	0.217577053043
6938_5_21	6938_5_21	-0.486303603396
6938_5_8	6938_5_8	-1.13047876464
6938_5_9	6938_5_9	0.379437664979
6938_6_11	6938_6_11	0.179196660456
6938_6_1	6938_6_1	-0.202648146783
6938_6_12	6938_6_12	-1.09622063627
6938_6_13	6938_6_13	-1.16631673256
6938_6_14	6938_6_14	0.590638540324
6938_6_15	6938_6_15	-0.526563407326
6630_3_1	6630_3_1	-0.165078869845
6938_6_16	6938_6_16	0.809426294292
6938_6_17	6938_6_17	-0.17437568418
6938_6_19	6938_6_19	-0.75861259618
6938_6_20	6938_6_20	-1.9782355064
6938_6_21	6938_6_21	1.47033388905
6938_6_2	6938_6_2	-0.499457710908
6938_6_22	6938_6_22	0.53784387282
6938_6_24	6938_6_24	-0.146662921195
6630_3_20	6630_3_20	-0.973190288377
6938_6_3	6938_6_3	0.0762737853495
6938_6_4	6938_6_4	-0.540546529875
6938_6_5	6938_6_5	0.511018559471
6938_6_8	6938_6_8	0.524467628193
6938_7_10	6938_7_10	-0.146662921195
6938_7_11	6938_7_11	0.0681543022461
6938_7_1	6938_7_1	-1.28433775448
6630_3_21	6630_3_21	-0.083880240245
6938_7_13	6938_7_13	0.442648109998
6938_7_15	6938_7_15	-0.460721184657
6938_7_16	6938_7_16	-0.499457710908
6938_7_17	6938_7_17	0.909375991796
6938_7_18	6938_7_18	2.02479197659
6938_7_20	6938_7_20	0.0843627749714
6938_7_21	6938_7_21	0.531164796565
6938_7_2	6938_7_2	-2.52792898296
6938_7_22	6938_7_22	-0.499457710908
6938_7_23	6938_7_23	-0.499457710908
6938_7_24	6938_7_24	-1.13047876464
6938_7_3	6938_7_3	-1.32755537863
6938_7_4	6938_7_4	-0.569460070919
6938_7_5	6938_7_5	-0.333565724504
6938_7_7	6938_7_7	-1.9782355064
6938_7_8	6938_7_8	1.16828493763
6938_7_9	6938_7_9	-0.202648146783
6938_8_10	6938_8_10	-1.20383423147
6938_8_11	6938_8_11	-0.312339987514
6938_8_1	6938_8_1	0.0843627749714
6938_8_12	6938_8_12	-0.333565724504
6938_8_14	6938_8_14	-0.34436106915
6938_8_15	6938_8_15	-0.165078869845
6938_8_16	6938_8_16	-0.34436106915
6938_8_17	6938_8_17	0.32183509605
6630_3_24	6630_3_24	1.24123743274
6938_8_18	6938_8_18	-0.569460070919
6938_8_19	6938_8_19	-0.51287255695
6938_8_21	6938_8_21	1.41687155278
6938_8_23	6938_8_23	0.821383000017
6938_8_24	6938_8_24	0.511018559471
6938_8_3	6938_8_3	0.0843627749714
6938_8_4	6938_8_4	-0.75861259618
6630_3_2	6630_3_2	0.365165057737
6938_8_5	6938_8_5	-1.13047876464
6938_8_6	6938_8_6	-2.32463966951
6938_8_7	6938_8_7	0.314537145017
6938_8_9	6938_8_9	0.705504071902
6949_1_10	6949_1_10	-0.71952621221
6949_1_11	6949_1_11	-0.554839260088
6949_1_1	6949_1_1	-1.52324219299
6949_1_13	6949_1_13	-0.0148328677886
6630_3_3	6630_3_3	1.00018464141
6259_5_1	6259_5_1	-1.9782355064
6949_1_15	6949_1_15	0.179196660456
6949_1_16	6949_1_16	1.85812437322
6949_1_17	6949_1_17	1.24123743274
6949_1_18	6949_1_18	-0.499457710908
6949_1_19	6949_1_19	-0.486303603396
6949_1_20	6949_1_20	-0.554839260088
6949_1_2	6949_1_2	0.357997117714
6949_1_22	6949_1_22	1.95950126064
6949_1_3	6949_1_3	-1.16631673256
6949_1_4	6949_1_4	0.623075761473
6949_1_5	6949_1_5	0.32183509605
6949_1_6	6949_1_6	-1.24313711701
6949_1_7	6949_1_7	1.08272888265
6949_1_8	6949_1_8	-0.499457710908
6949_1_9	6949_1_9	-1.09622063627
6949_2_10	6949_2_10	-0.221839910514
6630_3_5	6630_3_5	0.428742217983
6949_2_11	6949_2_11	-1.32755537863
6949_2_1	6949_2_1	-0.973190288377
6949_2_12	6949_2_12	-1.20383423147
6949_2_13	6949_2_13	0.544504969802
6949_2_14	6949_2_14	0.821383000017
6949_2_16	6949_2_16	0.815411470814
6949_2_17	6949_2_17	0.531164796565
6949_2_19	6949_2_19	-0.779142277026
6630_3_6	6630_3_6	0.186923619432
6949_2_20	6949_2_20	0.32183509605
6949_2_21	6949_2_21	1.14180931726
6949_2_2	6949_2_2	-0.261153316573
6949_2_22	6949_2_22	0.428742217983
6949_2_23	6949_2_23	-1.9782355064
6949_2_24	6949_2_24	-1.9782355064
6949_2_3	6949_2_3	-1.52324219299
6949_2_4	6949_2_4	2.91083911855
6949_2_6	6949_2_6	0.909375991796
6949_2_7	6949_2_7	-1.24313711701
6949_2_8	6949_2_8	-0.312339987514
6949_2_9	6949_2_9	-1.20383423147
6949_3_11	6949_3_11	0.754931062421
6949_3_1	6949_3_1	0.915140616534
6949_3_12	6949_3_12	-0.526563407326
6949_3_13	6949_3_13	0.194624887928
6949_3_14	6949_3_14	0.329110987479
6630_3_8	6630_3_8	1.06640845358
6949_3_16	6949_3_16	-1.24313711701
6949_3_17	6949_3_17	0.0843627749714
6949_3_18	6949_3_18	-0.183734596028
6949_3_19	6949_3_19	0.100451036435
6949_3_20	6949_3_20	0.0681543022461
6949_3_21	6949_3_21	-1.13047876464
6949_3_2	6949_3_2	0.292509285765
6949_3_22	6949_3_22	-1.16631673256
6949_3_24	6949_3_24	-0.0576791119509
6630_3_9	6630_3_9	0.635933857773
6949_3_3	6949_3_3	0.705504071902
6949_3_5	6949_3_5	-0.183734596028
6949_3_6	6949_3_6	1.24123743274
6949_3_7	6949_3_7	-0.486303603396
6949_3_8	6949_3_8	-0.486303603396
6949_3_9	6949_3_9	-0.569460070919
6949_4_10	6949_4_10	-0.945529345245
6949_4_11	6949_4_11	-0.366348141631
6949_4_12	6949_4_12	0.225178022583
6949_4_13	6949_4_13	-0.75861259618
6949_4_14	6949_4_14	-0.738753733943
6949_4_16	6949_4_16	-0.17437568418
6949_4_17	6949_4_17	-0.499457710908
6949_4_18	6949_4_18	-1.20383423147
6949_4_19	6949_4_19	-0.193157927511
6949_4_20	6949_4_20	0.623075761473
6949_4_22	6949_4_22	-0.738753733943
6949_4_23	6949_4_23	-0.738753733943
6949_4_24	6949_4_24	0.809426294292
6949_4_3	6949_4_3	-0.146662921195
6949_4_4	6949_4_4	-1.20383423147
6949_4_5	6949_4_5	-2.05800585579
6949_4_6	6949_4_6	0.299874408036
6949_4_7	6949_4_7	0.299874408036
6949_4_8	6949_4_8	-0.554839260088
6630_4_12	6630_4_12	-0.165078869845
6949_4_9	6949_4_9	-1.83085642029
6983_2_10	6983_2_10	0.815411470814
6983_2_11	6983_2_11	0.132279977173
6983_2_12	6983_2_12	-1.00201398173
6983_2_13	6983_2_13	0.299874408036
6983_2_14	6983_2_14	-1.16631673256
6983_2_15	6983_2_15	-1.09622063627
6630_4_13	6630_4_13	0.730336849499
6983_2_19	6983_2_19	-2.14215474639
6983_2_20	6983_2_20	-0.499457710908
6983_2_21	6983_2_21	1.67742064619
6983_2_22	6983_2_22	0.880366494552
6983_2_23	6983_2_23	-0.423972518253
6983_2_24	6983_2_24	-1.16631673256
6983_2_3	6983_2_3	1.39723920228
6983_2_4	6983_2_4	-0.412111055408
6630_4_14	6630_4_14	1.76402500267
6983_2_5	6983_2_5	-1.28433775448
6983_2_6	6983_2_6	-0.146662921195
6983_2_7	6983_2_7	0.570971793519
6983_3_49	6983_3_49	-1.16631673256
6983_3_50	6983_3_50	0.124365246139
6983_3_51	6983_3_51	-0.738753733943
6983_3_53	6983_3_53	0.435705051283
6630_4_15	6630_4_15	0.544504969802
6983_3_55	6983_3_55	-0.0318538980692
6983_3_56	6983_3_56	-0.71952621221
6983_3_57	6983_3_57	-0.0576791119509
6983_3_58	6983_3_58	-1.16631673256
6983_3_62	6983_3_62	0.988995234618
6983_3_63	6983_3_63	0.92089300228
6983_3_65	6983_3_65	2.53482445592
6983_3_66	6983_3_66	0.132279977173
6983_3_67	6983_3_67	-1.13047876464
6983_3_68	6983_3_68	-0.128470760933
6983_3_69	6983_3_69	0.477071207278
6983_3_71	6983_3_71	-0.366348141631
6983_4_73	6983_4_73	-0.193157927511
6983_4_75	6983_4_75	-1.16631673256
6983_4_76	6983_4_76	1.53733140928
6983_4_77	6983_4_77	-0.165078869845
6983_4_79	6983_4_79	0.179196660456
6983_4_81	6983_4_81	-0.499457710908
6983_4_82	6983_4_82	-0.193157927511
6983_4_83	6983_4_83	-0.682819171885
6630_4_18	6630_4_18	0.655098440363
6983_4_84	6983_4_84	1.16828493763
6983_4_85	6983_4_85	0.909375991796
6983_4_86	6983_4_86	-1.03207398046
6983_4_87	6983_4_87	-0.17437568418
6983_4_89	6983_4_89	-0.0148328677886
6983_4_91	6983_4_91	-0.51287255695
6983_4_92	6983_4_92	-1.90259707374
6983_4_93	6983_4_93	0.892007889083
6983_4_95	6983_4_95	-0.146662921195
6983_4_96	6983_4_96	-0.251200449899
6983_5_10	6983_5_10	-1.09622063627
6983_5_11	6983_5_11	-1.83085642029
6983_5_12	6983_5_12	-0.17437568418
6983_5_13	6983_5_13	1.24123743274
6983_5_15	6983_5_15	0.815411470814
6983_5_16	6983_5_16	-1.13047876464
6983_5_17	6983_5_17	2.38550108547
6983_5_19	6983_5_19	-1.09622063627
6983_5_21	6983_5_21	1.43152756221
6983_5_2	6983_5_2	0.0843627749714
6983_5_23	6983_5_23	-0.221839910514
6983_5_24	6983_5_24	-0.499457710908
6630_4_20	6630_4_20	1.088148818
6983_5_3	6983_5_3	1.08272888265
6983_5_4	6983_5_4	0.194624887928
6983_5_5	6983_5_5	2.25549042886
6983_5_6	6983_5_6	-1.06344848899
6983_5_7	6983_5_7	-0.973190288377
6983_5_8	6983_5_8	0.926633227825
6983_5_9	6983_5_9	-0.554839260088
6983_6_25	6983_6_25	-0.631637682688
6983_6_26	6983_6_26	-1.09622063627
6983_6_27	6983_6_27	0.909375991796
6630_4_21	6630_4_21	-0.128470760933
6983_6_28	6983_6_28	-1.06344848899
6983_6_31	6983_6_31	-0.51287255695
6983_6_32	6983_6_32	-1.09622063627
6983_6_34	6983_6_34	0.754931062421
6983_6_35	6983_6_35	0.32183509605
6983_6_37	6983_6_37	1.24638474416
6630_4_22	6630_4_22	-0.51287255695
6983_6_38	6983_6_38	0.0843627749714
6983_6_39	6983_6_39	0.32183509605
6983_6_40	6983_6_40	-0.312339987514
6983_6_41	6983_6_41	0.821383000017
6983_6_42	6983_6_42	-0.700892960429
6983_6_43	6983_6_43	0.428742217983
6983_6_45	6983_6_45	1.61725641002
6983_6_47	6983_6_47	-0.155841967806
6983_6_48	6983_6_48	-0.540546529875
6983_7_49	6983_7_49	1.54681269781
6983_7_50	6983_7_50	1.41687155278
6630_4_24	6630_4_24	-0.738753733943
6983_7_59	6983_7_59	2.15371067684
6983_7_60	6983_7_60	-0.526563407326
6983_7_61	6983_7_61	0.307216971162
6983_7_63	6983_7_63	-0.0318538980692
6983_7_65	6983_7_65	-0.119454105598
6983_7_66	6983_7_66	0.357997117714
6983_7_67	6983_7_67	-1.16631673256
6983_7_70	6983_7_70	0.564381501331
6983_8_73	6983_8_73	-0.0576791119509
6983_8_74	6983_8_74	0.292509285765
6983_8_75	6983_8_75	-0.193157927511
6983_8_76	6983_8_76	-0.193157927511
6983_8_77	6983_8_77	-0.165078869845
6630_4_3	6630_4_3	0.724151255025
6983_8_78	6983_8_78	1.27199975505
6983_8_80	6983_8_80	-0.155841967806
6983_8_82	6983_8_82	-1.83085642029
6983_8_83	6983_8_83	0.24030668839
6983_8_84	6983_8_84	-1.20383423147
6983_8_85	6983_8_85	-1.20383423147
6983_8_86	6983_8_86	1.53733140928
6983_8_87	6983_8_87	-1.24313711701
6983_8_89	6983_8_89	-1.20383423147
6983_8_90	6983_8_90	-0.499457710908
6983_8_92	6983_8_92	1.16828493763
6983_8_93	6983_8_93	-0.193157927511
6983_8_94	6983_8_94	-1.24313711701
6983_8_95	6983_8_95	0.299874408036
6983_8_96	6983_8_96	-0.17437568418
7004_5_10	7004_5_10	0.623075761473
6630_4_5	6630_4_5	-1.16631673256
7004_5_11	7004_5_11	0.809426294292
7004_5_1	7004_5_1	-0.17437568418
7004_5_12	7004_5_12	0.155858961397
7004_5_13	7004_5_13	0.179196660456
7004_5_14	7004_5_14	-0.51287255695
7004_5_15	7004_5_15	-0.165078869845
7004_5_16	7004_5_16	-1.16631673256
7004_5_17	7004_5_17	-0.51287255695
7004_5_18	7004_5_18	0.435705051283
7004_5_19	7004_5_19	-0.486303603396
6630_4_6	6630_4_6	0.292509285765
7004_5_20	7004_5_20	1.08272888265
7004_5_21	7004_5_21	-1.06344848899
7004_5_2	7004_5_2	0.909375991796
7004_5_22	7004_5_22	-0.34436106915
7004_5_23	7004_5_23	1.16828493763
7004_5_24	7004_5_24	-1.13047876464
7004_5_3	7004_5_3	-0.700892960429
7004_5_4	7004_5_4	-0.700892960429
7004_5_5	7004_5_5	-1.24313711701
7004_5_6	7004_5_6	1.53733140928
7004_5_7	7004_5_7	-0.554839260088
7004_5_8	7004_5_8	-0.51287255695
7004_6_25	7004_6_25	0.186923619432
7004_6_26	7004_6_26	0.32183509605
7004_6_27	7004_6_27	0.421759481051
7004_6_28	7004_6_28	1.61725641002
7004_6_29	7004_6_29	-0.554839260088
7004_6_30	7004_6_30	-0.51287255695
7004_6_31	7004_6_31	-1.09622063627
6630_4_8	6630_4_8	-1.9782355064
7004_6_32	7004_6_32	0.0924217167609
7004_6_34	7004_6_34	-0.71952621221
7004_6_36	7004_6_36	-0.322893996341
7004_6_37	7004_6_37	-1.16631673256
7004_6_38	7004_6_38	0.100451036435
7004_6_39	7004_6_39	0.754931062421
7004_6_40	7004_6_40	2.15371067684
7004_6_41	7004_6_41	-0.486303603396
6630_4_9	6630_4_9	-1.16631673256
7004_6_42	7004_6_42	0.33636497946
7004_6_43	7004_6_43	-1.13047876464
7004_6_44	7004_6_44	-0.146662921195
7004_6_45	7004_6_45	-1.47061351009
7004_6_47	7004_6_47	-1.09622063627
7004_6_48	7004_6_48	-1.09622063627
7004_7_49	7004_7_49	0.0681543022461
7004_7_50	7004_7_50	-0.34436106915
7004_7_51	7004_7_51	0.0681543022461
7004_7_52	7004_7_52	0.53784387282
7004_7_53	7004_7_53	-0.499457710908
7004_7_54	7004_7_54	1.17355268748
7004_7_55	7004_7_55	1.24123743274
7004_7_56	7004_7_56	2.02479197659
7004_7_57	7004_7_57	1.95950126064
7004_7_58	7004_7_58	1.24638474416
7004_7_60	7004_7_60	-0.261153316573
7004_7_61	7004_7_61	-1.90259707374
7004_7_62	7004_7_62	-0.473395908982
7004_7_64	7004_7_64	-0.554839260088
7004_7_65	7004_7_65	0.705504071902
7004_7_66	7004_7_66	0.64872645238
7004_7_67	7004_7_67	-1.16631673256
7004_7_68	7004_7_68	0.909375991796
7004_7_69	7004_7_69	1.31761319564
7004_7_70	7004_7_70	0.0518219654015
7004_7_71	7004_7_71	2.91083911855
6631_1_12	6631_1_12	0.285121430859
7004_7_72	7004_7_72	-0.312339987514
7004_8_73	7004_8_73	-0.165078869845
7004_8_74	7004_8_74	-0.301898160894
7004_8_76	7004_8_76	-0.473395908982
7004_8_78	7004_8_78	0.821383000017
7004_8_79	7004_8_79	1.14180931726
7004_8_80	7004_8_80	1.14180931726
7004_8_81	7004_8_81	1.41687155278
6631_1_13	6631_1_13	-0.631637682688
7004_8_82	7004_8_82	0.421759481051
7004_8_83	7004_8_83	-0.51287255695
7004_8_84	7004_8_84	0.0924217167609
7004_8_85	7004_8_85	-0.34436106915
7004_8_86	7004_8_86	0.100451036435
7004_8_87	7004_8_87	0.988995234618
7004_8_88	7004_8_88	-0.322893996341
7004_8_89	7004_8_89	-0.146662921195
7004_8_90	7004_8_90	-0.165078869845
7004_8_91	7004_8_91	-1.42055513091
7004_8_92	7004_8_92	0.33636497946
7004_8_93	7004_8_93	-0.51287255695
7004_8_95	7004_8_95	-0.51287255695
7004_8_96	7004_8_96	-1.13047876464
7011_3_15	7011_3_15	-1.9782355064
7011_3_17	7011_3_17	0.100451036435
7011_3_18	7011_3_18	0.983383695202
7011_3_20	7011_3_20	0.988995234618
7011_3_21	7011_3_21	-0.486303603396
7011_3_2	7011_3_2	-0.540546529875
7011_3_22	7011_3_22	0.124365246139
7011_3_23	7011_3_23	1.24123743274
7011_3_24	7011_3_24	1.31257546319
7011_3_3	7011_3_3	-1.20383423147
7011_3_4	7011_3_4	-0.193157927511
7011_3_5	7011_3_5	0.0843627749714
7011_3_6	7011_3_6	0.590638540324
7011_3_7	7011_3_7	0.421759481051
7011_3_9	7011_3_9	-0.146662921195
7011_4_10	7011_4_10	0.33636497946
6631_1_17	6631_1_17	-0.366348141631
7011_4_11	7011_4_11	0.511018559471
7011_4_1	7011_4_1	1.58921637972
7011_4_12	7011_4_12	-0.540546529875
7011_4_13	7011_4_13	-0.165078869845
7011_4_14	7011_4_14	-2.75448641136
7011_4_15	7011_4_15	-0.400426790279
7011_4_16	7011_4_16	1.53733140928
7011_4_17	7011_4_17	0.809426294292
7011_4_18	7011_4_18	-0.526563407326
7011_4_19	7011_4_19	0.179196660456
6631_1_18	6631_1_18	0.0924217167609
7011_4_20	7011_4_20	-0.75861259618
7011_4_21	7011_4_21	-0.526563407326
7011_4_2	7011_4_2	1.24123743274
7011_4_22	7011_4_22	0.809426294292
7011_4_23	7011_4_23	1.58921637972
7011_4_24	7011_4_24	0.0924217167609
7011_4_3	7011_4_3	0.868674215345
7011_4_4	7011_4_4	-0.436020963047
7011_4_5	7011_4_5	1.58921637972
7011_4_6	7011_4_6	-1.57860063907
6631_1_19	6631_1_19	0.983383695202
7011_4_8	7011_4_8	-0.973190288377
7011_4_9	7011_4_9	2.15371067684
7011_5_10	7011_5_10	-0.569460070919
7011_5_11	7011_5_11	-1.09622063627
7011_5_12	7011_5_12	0.435705051283
7011_5_13	7011_5_13	-1.09622063627
7011_5_14	7011_5_14	0.53784387282
7011_5_15	7011_5_15	-0.355286311359
7011_5_17	7011_5_17	-0.554839260088
7011_5_18	7011_5_18	-0.486303603396
7011_5_19	7011_5_19	-0.423972518253
7011_5_20	7011_5_20	-0.146662921195
7011_5_21	7011_5_21	-0.146662921195
7011_5_2	7011_5_2	-0.75861259618
7011_5_22	7011_5_22	-1.16631673256
7011_5_23	7011_5_23	-0.973190288377
7011_5_24	7011_5_24	1.58921637972
6631_1_20	6631_1_20	-0.499457710908
7011_5_4	7011_5_4	-0.436020963047
7011_5_5	7011_5_5	1.16828493763
7011_5_6	7011_5_6	0.225178022583
7011_5_8	7011_5_8	0.705504071902
7011_5_9	7011_5_9	0.155858961397
7011_6_10	7011_6_10	1.31761319564
7011_6_11	7011_6_11	1.24638474416
7011_6_1	7011_6_1	0.0681543022461
7011_6_12	7011_6_12	2.02479197659
7011_6_17	7011_6_17	-0.700892960429
7011_6_18	7011_6_18	-0.569460070919
7011_6_19	7011_6_19	-1.47061351009
7011_6_20	7011_6_20	1.41687155278
7011_6_21	7011_6_21	0.821383000017
6631_1_22	6631_1_22	-2.14215474639
7011_6_2	7011_6_2	0.0681543022461
7011_6_22	7011_6_22	0.64872645238
7011_6_23	7011_6_23	-1.16631673256
7011_6_24	7011_6_24	-0.312339987514
7011_6_3	7011_6_3	-0.473395908982
7011_6_4	7011_6_4	-1.06344848899
7011_6_5	7011_6_5	-1.20383423147
7011_6_6	7011_6_6	-1.13047876464
7011_6_7	7011_6_7	1.24123743274
7011_6_8	7011_6_8	-0.436020963047
7011_6_9	7011_6_9	0.909375991796
7038_4_10	7038_4_10	-0.486303603396
7038_4_1	7038_4_1	-0.34436106915
7038_4_12	7038_4_12	-1.9782355064
7038_4_13	7038_4_13	-1.9782355064
7038_4_14	7038_4_14	0.53784387282
7038_4_15	7038_4_15	-0.499457710908
7038_4_17	7038_4_17	-1.09622063627
6631_1_24	6631_1_24	0.724151255025
7038_4_18	7038_4_18	-1.09622063627
7038_4_19	7038_4_19	0.0681543022461
7038_4_20	7038_4_20	-0.34436106915
7038_4_21	7038_4_21	-0.322893996341
7038_4_2	7038_4_2	-2.52792898296
7038_4_22	7038_4_22	0.909375991796
7038_4_23	7038_4_23	0.0518219654015
7038_4_3	7038_4_3	-0.499457710908
7038_4_4	7038_4_4	0.435705051283
6631_1_2	6631_1_2	-1.09622063627
7038_4_5	7038_4_5	1.08272888265
7038_4_6	7038_4_6	0.155858961397
7038_4_7	7038_4_7	-2.05800585579
7038_4_8	7038_4_8	1.16828493763
7038_4_9	7038_4_9	0.442648109998
7038_5_10	7038_5_10	-0.146662921195
7038_5_11	7038_5_11	-1.13047876464
7038_5_1	7038_5_1	2.02479197659
7038_5_12	7038_5_12	-0.400426790279
7038_5_14	7038_5_14	1.55154525154
7038_5_15	7038_5_15	-0.526563407326
7038_5_16	7038_5_16	-0.822384967224
7038_5_18	7038_5_18	-1.9782355064
7038_5_19	7038_5_19	-0.261153316573
7038_5_20	7038_5_20	-0.486303603396
7038_5_2	7038_5_2	2.25127074414
7038_5_22	7038_5_22	0.116422419914
6631_1_4	6631_1_4	-0.0490303185016
7038_5_23	7038_5_23	0.64872645238
7038_5_24	7038_5_24	0.0924217167609
7038_5_3	7038_5_3	0.544504969802
7038_5_4	7038_5_4	1.55154525154
7038_5_5	7038_5_5	0.544504969802
7038_5_6	7038_5_6	-0.146662921195
7038_5_7	7038_5_7	-1.20383423147
7038_5_8	7038_5_8	1.55154525154
7038_6_10	7038_6_10	2.15371067684
6631_1_5	6631_1_5	-1.09622063627
7038_6_11	7038_6_11	0.988995234618
7038_6_1	7038_6_1	-0.71952621221
7038_6_13	7038_6_13	-1.9782355064
7038_6_14	7038_6_14	-1.16631673256
7038_6_16	7038_6_16	-2.87732444712
7038_6_17	7038_6_17	-1.16631673256
7038_6_18	7038_6_18	-0.499457710908
7038_6_19	7038_6_19	-1.47061351009
7038_6_20	7038_6_20	-1.06344848899
7038_6_21	7038_6_21	-0.75861259618
7038_6_2	7038_6_2	-1.13047876464
7038_6_22	7038_6_22	-1.09622063627
7038_6_23	7038_6_23	-0.34436106915
7038_6_24	7038_6_24	0.0924217167609
7038_6_3	7038_6_3	1.14180931726
7038_6_4	7038_6_4	-1.57860063907
7038_6_5	7038_6_5	-0.473395908982
7038_6_6	7038_6_6	0.421759481051
7038_6_7	7038_6_7	-0.301898160894
7038_6_8	7038_6_8	-0.51287255695
7038_6_9	7038_6_9	-0.973190288377
7038_7_10	7038_7_10	0.724151255025
7038_7_11	7038_7_11	-1.16631673256
7038_7_1	7038_7_1	-0.822384967224
7038_7_13	7038_7_13	-0.473395908982
7038_7_14	7038_7_14	0.544504969802
7038_7_16	7038_7_16	0.155858961397
7038_7_17	7038_7_17	-0.71952621221
7038_7_18	7038_7_18	-0.499457710908
7038_7_20	7038_7_20	-0.665272168126
7038_7_21	7038_7_21	-1.16631673256
7038_7_2	7038_7_2	0.299874408036
7038_7_22	7038_7_22	1.08272888265
7038_7_23	7038_7_23	-1.13047876464
7038_7_24	7038_7_24	0.511018559471
6631_1_9	6631_1_9	0.897809707967
7038_7_4	7038_7_4	0.724151255025
7038_7_5	7038_7_5	-1.09622063627
7038_7_7	7038_7_7	0.544504969802
7038_7_8	7038_7_8	1.47033388905
7038_8_25	7038_8_25	-1.9782355064
7038_8_26	7038_8_26	-0.322893996341
6631_2_10	6631_2_10	-1.9782355064
7038_8_28	7038_8_28	1.5420747629
7038_8_30	7038_8_30	2.02479197659
7038_8_31	7038_8_31	0.194624887928
7038_8_32	7038_8_32	2.25549042886
7038_8_33	7038_8_33	0.292509285765
7038_8_35	7038_8_35	1.85812437322
7038_8_36	7038_8_36	0.32183509605
7038_8_37	7038_8_37	0.915140616534
6631_2_11	6631_2_11	0.194624887928
7038_8_38	7038_8_38	-1.83085642029
7038_8_39	7038_8_39	2.91083911855
7038_8_40	7038_8_40	-0.779142277026
7038_8_41	7038_8_41	-0.486303603396
7038_8_42	7038_8_42	0.730336849499
7038_8_43	7038_8_43	-1.9782355064
7038_8_44	7038_8_44	0.570971793519
7038_8_45	7038_8_45	0.32183509605
7038_8_47	7038_8_47	-0.700892960429
7038_8_48	7038_8_48	1.24123743274
7054_4_10	7054_4_10	-0.526563407326
7054_4_11	7054_4_11	1.24638474416
7054_4_12	7054_4_12	-0.212207877764
7054_4_13	7054_4_13	-0.486303603396
7054_4_14	7054_4_14	-0.738753733943
7054_4_15	7054_4_15	-0.75861259618
6631_2_13	6631_2_13	0.821383000017
7054_4_18	7054_4_18	0.64872645238
7054_4_20	7054_4_20	-0.34436106915
7054_4_21	7054_4_21	-1.9782355064
7054_4_2	7054_4_2	-0.34436106915
7054_4_22	7054_4_22	0.421759481051
7054_4_23	7054_4_23	0.186923619432
7054_4_24	7054_4_24	0.839216566658
7054_4_3	7054_4_3	-0.584428647033
7054_4_4	7054_4_4	-0.71952621221
7054_4_5	7054_4_5	-1.69819164325
7054_4_6	7054_4_6	-0.71952621221
7054_4_7	7054_4_7	-0.71952621221
7054_4_8	7054_4_8	-1.76279144813
7054_4_9	7054_4_9	-0.322893996341
7054_5_10	7054_5_10	-1.09622063627
7054_5_11	7054_5_11	-0.333565724504
7054_5_1	7054_5_1	0.32183509605
7054_5_12	7054_5_12	-0.473395908982
7054_5_13	7054_5_13	-1.16631673256
6631_2_15	6631_2_15	-1.9782355064
7054_5_15	7054_5_15	0.856930394352
7054_5_16	7054_5_16	-0.473395908982
7054_5_18	7054_5_18	0.839216566658
7054_5_19	7054_5_19	-0.322893996341
7054_5_20	7054_5_20	0.557773673228
7054_5_2	7054_5_2	0.307216971162
7054_5_22	7054_5_22	-0.333565724504
6631_2_16	6631_2_16	-1.9782355064
7054_5_23	7054_5_23	0.32183509605
7054_5_24	7054_5_24	-0.526563407326
7054_5_3	7054_5_3	-0.333565724504
7054_5_6	7054_5_6	0.839216566658
7054_5_8	7054_5_8	0.32183509605
7054_5_9	7054_5_9	0.557773673228
6631_2_17	6631_2_17	-1.13047876464
7054_6_11	7054_6_11	-0.71952621221
7054_6_12	7054_6_12	-1.9782355064
7054_6_13	7054_6_13	0.839216566658
7054_6_14	7054_6_14	-0.322893996341
7054_6_15	7054_6_15	-1.42055513091
7054_6_16	7054_6_16	-1.90259707374
7054_6_18	7054_6_18	-0.584428647033
7054_6_19	7054_6_19	-0.526563407326
7054_6_21	7054_6_21	-0.212207877764
7054_6_22	7054_6_22	-1.9782355064
7054_6_24	7054_6_24	-0.083880240245
7054_6_3	7054_6_3	-0.599765963762
7054_6_4	7054_6_4	-0.554839260088
7054_6_5	7054_6_5	-0.822384967224
7054_6_6	7054_6_6	-0.499457710908
6631_2_19	6631_2_19	-1.16631673256
7054_6_7	7054_6_7	2.15371067684
7054_6_8	7054_6_8	0.155858961397
7054_6_9	7054_6_9	0.809426294292
7068_4_10	7068_4_10	-1.9782355064
7068_4_11	7068_4_11	-0.71952621221
7068_4_1	7068_4_1	-0.738753733943
7068_4_12	7068_4_12	2.15371067684
7068_4_13	7068_4_13	-0.212207877764
7068_4_14	7068_4_14	-1.9782355064
7068_4_15	7068_4_15	-0.71952621221
7068_4_17	7068_4_17	-1.16631673256
7068_4_18	7068_4_18	0.597159771013
7068_4_19	7068_4_19	0.53784387282
7068_4_20	7068_4_20	0.314537145017
7068_4_2	7068_4_2	-0.845190386169
7068_4_22	7068_4_22	0.705504071902
7068_4_23	7068_4_23	0.785347367784
7068_4_24	7068_4_24	-0.231547212315
7068_4_3	7068_4_3	-0.822384967224
7068_4_4	7068_4_4	0.186923619432
7068_4_5	7068_4_5	1.41687155278
7068_4_6	7068_4_6	-1.83085642029
7068_4_7	7068_4_7	-1.9782355064
7068_4_8	7068_4_8	-0.554839260088
7068_4_9	7068_4_9	-0.75861259618
7092_6_11	7092_6_11	-0.499457710908
7092_6_13	7092_6_13	-1.9782355064
7092_6_14	7092_6_14	-1.83085642029
7092_6_15	7092_6_15	0.435705051283
7092_6_16	7092_6_16	-1.13047876464
7092_6_17	7092_6_17	-0.322893996341
7092_6_19	7092_6_19	-1.83085642029
7092_6_20	7092_6_20	-0.71952621221
7092_6_21	7092_6_21	-0.71952621221
7092_6_2	7092_6_2	-1.16631673256
7092_6_22	7092_6_22	1.31761319564
7092_6_23	7092_6_23	-0.526563407326
7092_6_24	7092_6_24	1.41687155278
7092_6_3	7092_6_3	-0.083880240245
7092_6_4	7092_6_4	-0.083880240245
7092_6_6	7092_6_6	-0.473395908982
7092_6_7	7092_6_7	2.96756075506
6593_5_9	6593_5_9	-0.526563407326
6731_4_14	6731_4_14	-1.32755537863
6805_4_24	6805_4_24	0.524467628193
6805_4_5	6805_4_5	1.08272888265
6805_4_7	6805_4_7	-1.00201398173
6805_5_13	6805_5_13	-0.17437568418
6805_5_15	6805_5_15	0.307216971162
6631_2_24	6631_2_24	0.314537145017
6823_1_10	6823_1_10	0.909375991796
6823_1_11	6823_1_11	-0.137539793479
6823_1_13	6823_1_13	2.20897596194
6823_1_14	6823_1_14	0.292509285765
6823_1_16	6823_1_16	0.329110987479
6823_1_18	6823_1_18	0.642338291876
6631_2_2	6631_2_2	-1.90259707374
6823_1_20	6823_1_20	0.32183509605
6823_1_21	6823_1_21	-0.486303603396
6823_1_2	6823_1_2	-0.540546529875
6823_1_23	6823_1_23	-1.24313711701
6823_1_24	6823_1_24	1.27199975505
6823_1_3	6823_1_3	1.52782829464
6823_1_7	6823_1_7	0.629513048398
6823_1_8	6823_1_8	-1.37291646765
6823_1_9	6823_1_9	0.748804548145
6823_2_10	6823_2_10	0.108451141002
6823_2_11	6823_2_11	0.307216971162
6823_2_1	6823_2_1	1.5183030488
6823_2_12	6823_2_12	0.742663402909
6823_2_13	6823_2_13	-1.16631673256
6823_2_14	6823_2_14	0.0681543022461
6631_2_4	6631_2_4	1.33268197952
6823_2_15	6823_2_15	-1.16631673256
6823_2_16	6823_2_16	0.909375991796
6823_2_17	6823_2_17	-1.16631673256
6823_2_18	6823_2_18	-0.0663696341703
6823_2_19	6823_2_19	0.597159771013
6823_2_20	6823_2_20	-1.90259707374
6823_2_21	6823_2_21	0.343597229252
6823_2_2	6823_2_2	1.5420747629
6823_2_22	6823_2_22	-1.28433775448
6823_2_23	6823_2_23	0.0924217167609
6823_2_24	6823_2_24	0.524467628193
6823_2_3	6823_2_3	0.343597229252
6823_2_5	6823_2_5	1.37750019382
6823_2_6	6823_2_6	-0.448266815401
6823_2_9	6823_2_9	0.262819676625
6823_3_10	6823_3_10	2.07660861182
6823_3_11	6823_3_11	1.96824209374
6631_2_6	6631_2_6	-1.16631673256
6823_3_1	6823_3_1	-0.486303603396
6823_3_12	6823_3_12	1.95950126064
6823_3_14	6823_3_14	-1.06344848899
6823_3_16	6823_3_16	-1.16631673256
6823_3_17	6823_3_17	1.82246294229
6823_3_18	6823_3_18	0.815411470814
6823_3_19	6823_3_19	0.0843627749714
6823_3_20	6823_3_20	-0.322893996341
6631_2_7	6631_2_7	-0.333565724504
6823_3_21	6823_3_21	0.797414650799
6823_3_2	6823_3_2	1.09355876042
6823_3_22	6823_3_22	-1.32755537863
6823_3_23	6823_3_23	-0.499457710908
6823_3_24	6823_3_24	0.724151255025
6823_3_3	6823_3_3	1.66821503734
6823_3_4	6823_3_4	-0.183734596028
6823_3_6	6823_3_6	1.41197330507
6823_3_7	6823_3_7	0.132279977173
6823_3_9	6823_3_9	-1.20383423147
6823_4_11	6823_4_11	-1.83085642029
6823_4_1	6823_4_1	1.85812437322
6823_4_12	6823_4_12	2.38550108547
6823_4_13	6823_4_13	2.20897596194
6823_4_14	6823_4_14	0.524467628193
6823_4_15	6823_4_15	1.54681269781
6823_4_16	6823_4_16	-1.16631673256
6823_4_17	6823_4_17	-1.16631673256
6823_4_18	6823_4_18	0.209951362583
6823_4_19	6823_4_19	-0.631637682688
6823_4_21	6823_4_21	2.15371067684
6823_4_2	6823_4_2	2.91083911855
6823_4_22	6823_4_22	1.27199975505
6823_4_24	6823_4_24	0.892007889083
6823_4_3	6823_4_3	-1.16631673256
6631_3_10	6631_3_10	-0.17437568418
6823_4_4	6823_4_4	0.748804548145
6823_4_5	6823_4_5	0.350807891366
6823_4_6	6823_4_6	-1.13047876464
6823_4_7	6823_4_7	0.524467628193
6823_4_9	6823_4_9	1.09355876042
6823_5_10	6823_5_10	1.24123743274
6823_5_1	6823_5_1	-0.569460070919
6823_5_12	6823_5_12	0.32183509605
6823_5_13	6823_5_13	0.61015134278
6823_5_14	6823_5_14	1.33268197952
6823_5_18	6823_5_18	0.524467628193
6823_5_19	6823_5_19	0.350807891366
6823_5_20	6823_5_20	0.329110987479
6823_5_21	6823_5_21	0.0924217167609
6823_5_2	6823_5_2	0.32183509605
6631_3_12	6631_3_12	0.724151255025
6823_5_22	6823_5_22	-1.20383423147
6823_5_23	6823_5_23	-1.16631673256
6823_5_24	6823_5_24	2.38550108547
6823_5_3	6823_5_3	-0.738753733943
6823_5_4	6823_5_4	0.92089300228
6823_5_5	6823_5_5	0.0924217167609
6823_5_6	6823_5_6	1.5183030488
6823_5_7	6823_5_7	-0.146662921195
6823_5_8	6823_5_8	2.25549042886
6823_5_9	6823_5_9	-2.05800585579
6631_3_13	6631_3_13	1.32264349227
6823_6_10	6823_6_10	-1.9782355064
6823_6_11	6823_6_11	-0.165078869845
6823_6_12	6823_6_12	0.815411470814
6823_6_14	6823_6_14	2.20897596194
6823_6_15	6823_6_15	-0.165078869845
6823_6_17	6823_6_17	-0.322893996341
6823_6_18	6823_6_18	1.43152756221
6823_6_20	6823_6_20	1.33268197952
6823_6_21	6823_6_21	-1.06344848899
6823_6_2	6823_6_2	-1.42055513091
6823_6_22	6823_6_22	-0.17437568418
6823_6_23	6823_6_23	0.544504969802
6823_6_24	6823_6_24	0.116422419914
6823_6_3	6823_6_3	0.642338291876
6823_6_4	6823_6_4	-0.17437568418
6823_6_5	6823_6_5	-0.119454105598
6631_3_15	6631_3_15	0.616621894106
6823_6_6	6823_6_6	-0.499457710908
6823_6_7	6823_6_7	0.754931062421
6823_7_10	6823_7_10	1.09355876042
6823_7_11	6823_7_11	-1.16631673256
6823_7_1	6823_7_1	0.773223735798
6823_7_12	6823_7_12	2.25127074414
6823_7_14	6823_7_14	0.531164796565
6823_7_15	6823_7_15	0.53784387282
6823_7_16	6823_7_16	1.82246294229
6823_7_18	6823_7_18	-0.584428647033
6823_7_19	6823_7_19	-0.355286311359
6823_7_20	6823_7_20	2.91083911855
6823_7_2	6823_7_2	0.0681543022461
6823_7_23	6823_7_23	0.350807891366
6823_7_24	6823_7_24	-0.71952621221
6823_7_3	6823_7_3	-1.24313711701
6823_7_4	6823_7_4	-1.03207398046
6823_7_5	6823_7_5	-1.83085642029
6823_7_7	6823_7_7	1.63585235765
6823_7_8	6823_7_8	1.24123743274
6823_7_9	6823_7_9	0.53784387282
6972_2_11	6972_2_11	-0.202648146783
6631_3_18	6631_3_18	-1.32755537863
6972_2_1	6972_2_1	-1.24313711701
6972_2_14	6972_2_14	2.25127074414
6972_2_15	6972_2_15	0.132279977173
6972_2_16	6972_2_16	1.58921637972
6972_2_17	6972_2_17	-0.221839910514
6972_2_19	6972_2_19	0.544504969802
6972_2_20	6972_2_20	1.58921637972
6972_2_21	6972_2_21	0.292509285765
6972_2_3	6972_2_3	-0.0318538980692
6972_2_4	6972_2_4	-0.486303603396
6972_2_5	6972_2_5	-0.183734596028
6972_2_6	6972_2_6	-0.486303603396
6631_3_1	6631_3_1	-0.0490303185016
6972_2_8	6972_2_8	0.988995234618
6972_2_9	6972_2_9	0.511018559471
6972_3_10	6972_3_10	0.623075761473
6972_3_11	6972_3_11	-0.738753733943
6972_3_1	6972_3_1	-0.80038481439
6972_3_12	6972_3_12	0.909375991796
6972_3_13	6972_3_13	-0.0318538980692
6972_3_14	6972_3_14	1.53733140928
6972_3_15	6972_3_15	-1.16631673256
6972_3_16	6972_3_16	1.58921637972
6631_3_20	6631_3_20	-0.17437568418
6972_3_17	6972_3_17	-1.20383423147
6972_3_18	6972_3_18	-0.75861259618
6972_3_19	6972_3_19	0.809426294292
6972_3_20	6972_3_20	0.511018559471
6972_3_21	6972_3_21	-0.355286311359
6972_3_24	6972_3_24	-0.526563407326
6972_3_3	6972_3_3	0.524467628193
6631_3_21	6631_3_21	-1.16631673256
6972_3_4	6972_3_4	0.0762737853495
6972_3_6	6972_3_6	1.17355268748
6972_3_7	6972_3_7	-0.146662921195
6972_3_8	6972_3_8	0.132279977173
6972_3_9	6972_3_9	-0.193157927511
6972_4_10	6972_4_10	-0.17437568418
6972_4_13	6972_4_13	-0.75861259618
6972_4_14	6972_4_14	0.53784387282
6972_4_16	6972_4_16	-1.03207398046
6972_4_17	6972_4_17	-1.32755537863
6972_4_18	6972_4_18	0.155858961397
6972_4_20	6972_4_20	-0.355286311359
6631_3_23	6631_3_23	0.926633227825
6972_4_22	6972_4_22	0.0762737853495
6972_4_23	6972_4_23	0.815411470814
6972_4_24	6972_4_24	-0.146662921195
6972_4_3	6972_4_3	1.55154525154
6972_4_4	6972_4_4	1.55154525154
6972_4_5	6972_4_5	1.16828493763
6972_4_6	6972_4_6	-1.63685761567
6972_4_7	6972_4_7	2.07660861182
6972_4_9	6972_4_9	-1.63685761567
6631_3_24	6631_3_24	0.116422419914
6972_5_10	6972_5_10	1.47033388905
6972_5_11	6972_5_11	0.314537145017
6972_5_1	6972_5_1	1.95950126064
6972_5_12	6972_5_12	-1.16631673256
6972_5_13	6972_5_13	1.47033388905
6972_5_14	6972_5_14	-1.13047876464
6972_5_15	6972_5_15	1.31761319564
6972_5_17	6972_5_17	0.442648109998
6972_5_18	6972_5_18	-1.03207398046
6631_3_2	6631_3_2	0.897809707967
6972_5_19	6972_5_19	0.32183509605
6972_5_21	6972_5_21	2.91083911855
6972_5_2	6972_5_2	-1.09622063627
6972_5_22	6972_5_22	0.531164796565
6972_5_24	6972_5_24	0.0843627749714
6972_5_4	6972_5_4	-0.460721184657
6972_5_5	6972_5_5	1.61725641002
6972_5_6	6972_5_6	1.41687155278
6972_5_7	6972_5_7	-1.9782355064
6972_5_8	6972_5_8	0.343597229252
6899_6_2	6899_6_2	0.350807891366
6631_3_4	6631_3_4	-0.526563407326
6631_3_5	6631_3_5	0.544504969802
6631_3_6	6631_3_6	-1.16631673256
6631_3_8	6631_3_8	0.0924217167609
6631_3_9	6631_3_9	-0.71952621221
6631_4_10	6631_4_10	-0.312339987514
6631_4_11	6631_4_11	-0.251200449899
6631_4_12	6631_4_12	0.635933857773
6631_4_13	6631_4_13	-0.27119534183
6631_4_14	6631_4_14	0.0762737853495
6631_4_15	6631_4_15	0.24030668839
6631_4_17	6631_4_17	0.225178022583
6631_4_18	6631_4_18	0.428742217983
6631_4_21	6631_4_21	-1.16631673256
6631_4_22	6631_4_22	0.2327544952
6631_4_24	6631_4_24	-2.42353519191
6631_4_2	6631_4_2	-0.29156331694
6631_4_3	6631_4_3	-0.146662921195
6631_4_4	6631_4_4	-1.20383423147
6631_4_6	6631_4_6	-0.261153316573
6631_4_8	6631_4_8	-0.486303603396
6631_4_9	6631_4_9	-1.16631673256
6631_5_10	6631_5_10	-0.486303603396
6631_5_15	6631_5_15	-0.499457710908
6631_5_16	6631_5_16	-0.183734596028
6631_5_17	6631_5_17	0.292509285765
6631_5_18	6631_5_18	0.544504969802
6631_5_19	6631_5_19	1.088148818
6631_5_1	6631_5_1	-0.165078869845
6631_5_20	6631_5_20	0.730336849499
6631_5_21	6631_5_21	0.307216971162
6631_5_22	6631_5_22	-1.20383423147
6631_5_24	6631_5_24	-1.20383423147
6631_5_5	6631_5_5	-0.17437568418
6631_5_7	6631_5_7	-1.9782355064
6631_5_8	6631_5_8	0.724151255025
6631_6_11	6631_6_11	-0.128470760933
6631_6_12	6631_6_12	0.414756709987
6631_6_13	6631_6_13	1.08272888265
6631_6_14	6631_6_14	0.551148199531
6631_6_15	6631_6_15	-1.09622063627
6631_6_16	6631_6_16	0.897809707967
6631_6_17	6631_6_17	0.0843627749714
6259_6_12	6259_6_12	0.194624887928
6631_6_1	6631_6_1	-1.06344848899
6631_6_20	6631_6_20	-1.09622063627
6631_6_23	6631_6_23	1.24123743274
6631_6_2	6631_6_2	-1.09622063627
6631_6_3	6631_6_3	-0.251200449899
6631_6_4	6631_6_4	1.76402500267
6259_6_13	6259_6_13	-0.71952621221
6631_6_6	6631_6_6	0.655098440363
6631_6_7	6631_6_7	1.088148818
6631_6_9	6631_6_9	0.742663402909
6259_6_14	6259_6_14	-1.9782355064
6631_7_1	6631_7_1	-0.17437568418
6259_6_15	6259_6_15	-0.738753733943
6631_7_4	6631_7_4	0.773223735798
6631_7_6	6631_7_6	0.724151255025
6631_7_7	6631_7_7	1.088148818
6680_4_11	6680_4_11	-0.918961984526
6680_4_12	6680_4_12	0.132279977173
6680_4_14	6680_4_14	-0.155841967806
6680_4_15	6680_4_15	-2.52792898296
6680_4_17	6680_4_17	-1.16631673256
6680_4_18	6680_4_18	1.03348870506
6680_4_19	6680_4_19	1.11509991433
6680_4_1	6680_4_1	1.16300814432
6680_4_20	6680_4_20	-0.738753733943
6680_4_21	6680_4_21	-0.17437568418
6680_4_24	6680_4_24	1.16300814432
6680_4_3	6680_4_3	0.314537145017
6680_4_4	6680_4_4	-3.60194430012
6680_4_5	6680_4_5	2.16223484426
6680_4_6	6680_4_6	-1.09622063627
6680_4_7	6680_4_7	0.108451141002
6259_6_18	6259_6_18	0.132279977173
6680_4_8	6680_4_8	0.0924217167609
6680_5_12	6680_5_12	-0.918961984526
6680_5_13	6680_5_13	0.544504969802
6680_5_14	6680_5_14	1.07185876738
6680_5_15	6680_5_15	1.45582776377
6680_5_16	6680_5_16	-1.06344848899
6680_5_17	6680_5_17	-0.682819171885
6259_6_19	6259_6_19	-1.9782355064
6680_5_20	6680_5_20	-0.499457710908
6680_5_21	6680_5_21	0.803427383447
6680_5_22	6680_5_22	2.53482445592
6680_5_24	6680_5_24	0.53784387282
6680_5_9	6680_5_9	0.892007889083
6680_6_11	6680_6_11	-1.16631673256
6680_6_12	6680_6_12	-0.202648146783
6680_6_13	6680_6_13	-1.24313711701
6259_6_20	6259_6_20	-0.738753733943
6680_6_14	6680_6_14	0.0924217167609
6680_6_15	6680_6_15	-0.526563407326
6680_6_17	6680_6_17	1.96824209374
6680_6_18	6680_6_18	1.5183030488
6680_6_19	6680_6_19	0.421759481051
6680_6_21	6680_6_21	0.108451141002
6680_6_22	6680_6_22	0.903599048832
6680_6_23	6680_6_23	-1.63685761567
6680_6_24	6680_6_24	1.16300814432
6680_6_2	6680_6_2	0.803427383447
6680_6_3	6680_6_3	1.32264349227
6680_6_4	6680_6_4	1.33268197952
6680_6_5	6680_6_5	1.088148818
6680_6_6	6680_6_6	-0.312339987514
6680_6_8	6680_6_8	2.96756075506
6680_6_9	6680_6_9	1.11509991433
6680_7_10	6680_7_10	-0.738753733943
6680_7_11	6680_7_11	-0.202648146783
6680_7_13	6680_7_13	-0.165078869845
6680_7_14	6680_7_14	1.03348870506
6680_7_16	6680_7_16	-0.29156331694
6680_7_17	6680_7_17	1.00018464141
6680_7_18	6680_7_18	1.82246294229
6680_7_20	6680_7_20	-1.83085642029
6680_7_21	6680_7_21	0.827340968431
6680_7_22	6680_7_22	-0.137539793479
6680_7_3	6680_7_3	-0.312339987514
6680_7_4	6680_7_4	-0.51287255695
6680_7_5	6680_7_5	1.0609478791
6259_6_24	6259_6_24	-0.0318538980692
6680_7_6	6680_7_6	-0.554839260088
6680_7_7	6680_7_7	0.0104218359689
6680_7_9	6680_7_9	0.862808788925
6730_1_10	6730_1_10	0.2327544952
6730_1_11	6730_1_11	-1.16631673256
6730_1_12	6730_1_12	-1.13047876464
6259_6_2	6259_6_2	-0.700892960429
6730_1_16	6730_1_16	0.53784387282
6730_1_17	6730_1_17	0.64872645238
6730_1_18	6730_1_18	0.730336849499
6730_1_19	6730_1_19	1.088148818
6730_1_20	6730_1_20	-1.09622063627
6730_1_22	6730_1_22	-1.76279144813
6259_6_3	6259_6_3	-2.14215474639
6730_1_3	6730_1_3	-0.499457710908
6730_1_5	6730_1_5	-0.540546529875
6730_1_6	6730_1_6	1.00018464141
6730_1_7	6730_1_7	-1.13047876464
6730_1_8	6730_1_8	0.292509285765
6730_3_11	6730_3_11	0.773223735798
6730_3_13	6730_3_13	-0.17437568418
6730_3_16	6730_3_16	0.983383695202
6730_3_17	6730_3_17	-0.388910540262
6730_3_1	6730_3_1	1.76402500267
6730_3_20	6730_3_20	-0.193157927511
6730_3_23	6730_3_23	1.088148818
6730_3_24	6730_3_24	-1.9782355064
6730_3_4	6730_3_4	0.64872645238
6730_3_5	6730_3_5	-0.822384967224
6730_3_7	6730_3_7	0.32183509605
6641_6_12	6641_6_12	1.33268197952
6641_6_13	6641_6_13	-0.526563407326
6641_6_17	6641_6_17	0.194624887928
6641_6_18	6641_6_18	-0.17437568418
6641_6_19	6641_6_19	1.00018464141
6641_6_20	6641_6_20	-1.9782355064
6641_6_23	6641_6_23	-0.51287255695
6641_6_2	6641_6_2	-0.499457710908
6641_6_4	6641_6_4	-0.486303603396
6641_6_5	6641_6_5	0.194624887928
6641_6_6	6641_6_6	-1.16631673256
6641_6_7	6641_6_7	0.616621894106
6641_6_8	6641_6_8	0.724151255025
6641_6_9	6641_6_9	1.32264349227
6649_8_10	6649_8_10	0.365165057737
6649_8_11	6649_8_11	-1.13047876464
6649_8_13	6649_8_13	-0.51287255695
6649_8_14	6649_8_14	-1.83085642029
6649_8_17	6649_8_17	0.2327544952
6649_8_18	6649_8_18	-1.90259707374
6649_8_19	6649_8_19	-0.499457710908
6649_8_1	6649_8_1	-0.51287255695
6649_8_20	6649_8_20	-0.631637682688
6259_7_10	6259_7_10	-0.333565724504
6649_8_24	6649_8_24	-0.0318538980692
6649_8_2	6649_8_2	1.32264349227
6649_8_4	6649_8_4	-0.526563407326
6649_8_5	6649_8_5	0.943781724617
6649_8_6	6649_8_6	-2.14215474639
6649_8_8	6649_8_8	0.314537145017
6664_1_12	6664_1_12	0.544504969802
6664_1_13	6664_1_13	-0.193157927511
6664_1_14	6664_1_14	-1.20383423147
6664_1_15	6664_1_15	0.897809707967
6664_1_1	6664_1_1	-0.526563407326
6664_1_20	6664_1_20	-1.06344848899
6664_1_23	6664_1_23	-0.526563407326
6664_1_3	6664_1_3	-0.499457710908
6664_1_5	6664_1_5	0.730336849499
6664_1_7	6664_1_7	0.285121430859
6664_1_8	6664_1_8	-0.0490303185016
6673_8_10	6673_8_10	-0.17437568418
6673_8_11	6673_8_11	1.33268197952
6673_8_12	6673_8_12	-0.366348141631
6673_8_13	6673_8_13	0.616621894106
6673_8_15	6673_8_15	0.194624887928
6259_7_14	6259_7_14	-0.700892960429
6673_8_16	6673_8_16	-0.146662921195
6673_8_1	6673_8_1	-0.499457710908
6673_8_20	6673_8_20	1.00018464141
6673_8_21	6673_8_21	-2.05800585579
6673_8_22	6673_8_22	-0.51287255695
6673_8_24	6673_8_24	-1.20383423147
6259_7_15	6259_7_15	-1.9782355064
6673_8_3	6673_8_3	-0.0490303185016
6673_8_4	6673_8_4	1.32264349227
6673_8_6	6673_8_6	1.088148818
6673_8_7	6673_8_7	-0.128470760933
6673_8_8	6673_8_8	0.724151255025
6673_8_9	6673_8_9	-0.486303603396
6680_8_10	6680_8_10	-0.322893996341
6680_8_13	6680_8_13	0.655098440363
6680_8_15	6680_8_15	-1.90259707374
6680_8_17	6680_8_17	1.088148818
6680_8_19	6680_8_19	-0.333565724504
6680_8_1	6680_8_1	0.217577053043
6680_8_20	6680_8_20	-1.83085642029
6680_8_24	6680_8_24	-1.09622063627
6680_8_2	6680_8_2	-0.499457710908
6680_8_5	6680_8_5	-0.0404222349827
6680_8_8	6680_8_8	1.088148818
6714_7_11	6714_7_11	0.0924217167609
6714_7_12	6714_7_12	-0.486303603396
6714_7_14	6714_7_14	0.655098440363
6714_7_15	6714_7_15	-1.13047876464
6714_7_18	6714_7_18	0.730336849499
6714_7_1	6714_7_1	1.06640845358
6714_7_20	6714_7_20	-1.03207398046
6714_7_21	6714_7_21	0.108451141002
6714_7_24	6714_7_24	-1.13047876464
6714_7_5	6714_7_5	-1.03207398046
6714_7_8	6714_7_8	-1.16631673256
6714_7_9	6714_7_9	0.724151255025
6714_8_11	6714_8_11	-0.312339987514
6714_8_12	6714_8_12	0.414756709987
6714_8_13	6714_8_13	-0.301898160894
6714_8_14	6714_8_14	-0.322893996341
6714_8_15	6714_8_15	-0.17437568418
6714_8_16	6714_8_16	-2.14215474639
6714_8_17	6714_8_17	-0.499457710908
6714_8_18	6714_8_18	1.06640845358
6714_8_20	6714_8_20	-0.486303603396
6714_8_22	6714_8_22	0.217577053043
6259_7_21	6259_7_21	-1.9782355064
6714_8_24	6714_8_24	0.897809707967
6714_8_2	6714_8_2	0.943781724617
6714_8_8	6714_8_8	0.821383000017
6714_8_9	6714_8_9	0.926633227825
6259_7_22	6259_7_22	-1.9782355064
6730_4_12	6730_4_12	-0.193157927511
6730_4_13	6730_4_13	0.943781724617
6730_4_14	6730_4_14	0.0762737853495
6730_4_15	6730_4_15	-1.00201398173
6730_4_16	6730_4_16	0.217577053043
6730_4_18	6730_4_18	0.544504969802
6730_4_19	6730_4_19	0.407733772774
6730_4_1	6730_4_1	0.616621894106
6730_4_20	6730_4_20	-0.27119534183
6730_4_21	6730_4_21	0.903599048832
6730_4_22	6730_4_22	0.736507534325
6730_4_24	6730_4_24	0.903599048832
6730_4_3	6730_4_3	0.926633227825
6730_4_4	6730_4_4	0.839216566658
6730_4_5	6730_4_5	-0.29156331694
6730_4_6	6730_4_6	-1.03207398046
6730_4_7	6730_4_7	-0.486303603396
6730_4_9	6730_4_9	-0.146662921195
6730_5_11	6730_5_11	-0.301898160894
6730_5_12	6730_5_12	0.24030668839
6730_5_14	6730_5_14	-1.90259707374
6730_5_17	6730_5_17	1.11509991433
6730_5_18	6730_5_18	1.82246294229
6730_5_19	6730_5_19	0.414756709987
[truncated: 157 more rows]
