# Supplementary material for: Genome-wide identification of lineage and locus specific variation associated with pneumococcal carriage duration
Source: eLife journal article supplement (doi:10.7554/elife.26255), 2017-07-25
Supplement: supp [file elife-26255-supp-v1.zip › elife_poa_e26255_Figure_4_Figure_Supplement_3.pdf]

Serotype

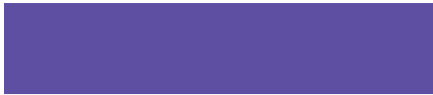

Non-typable

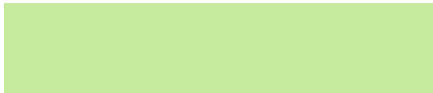

23F

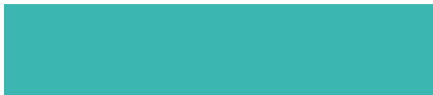

34

Duration (days)

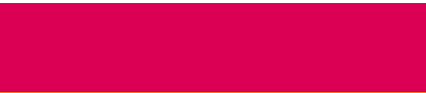

30

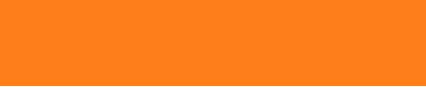

300

Carriage duration

Warped carriage duration

Serotype

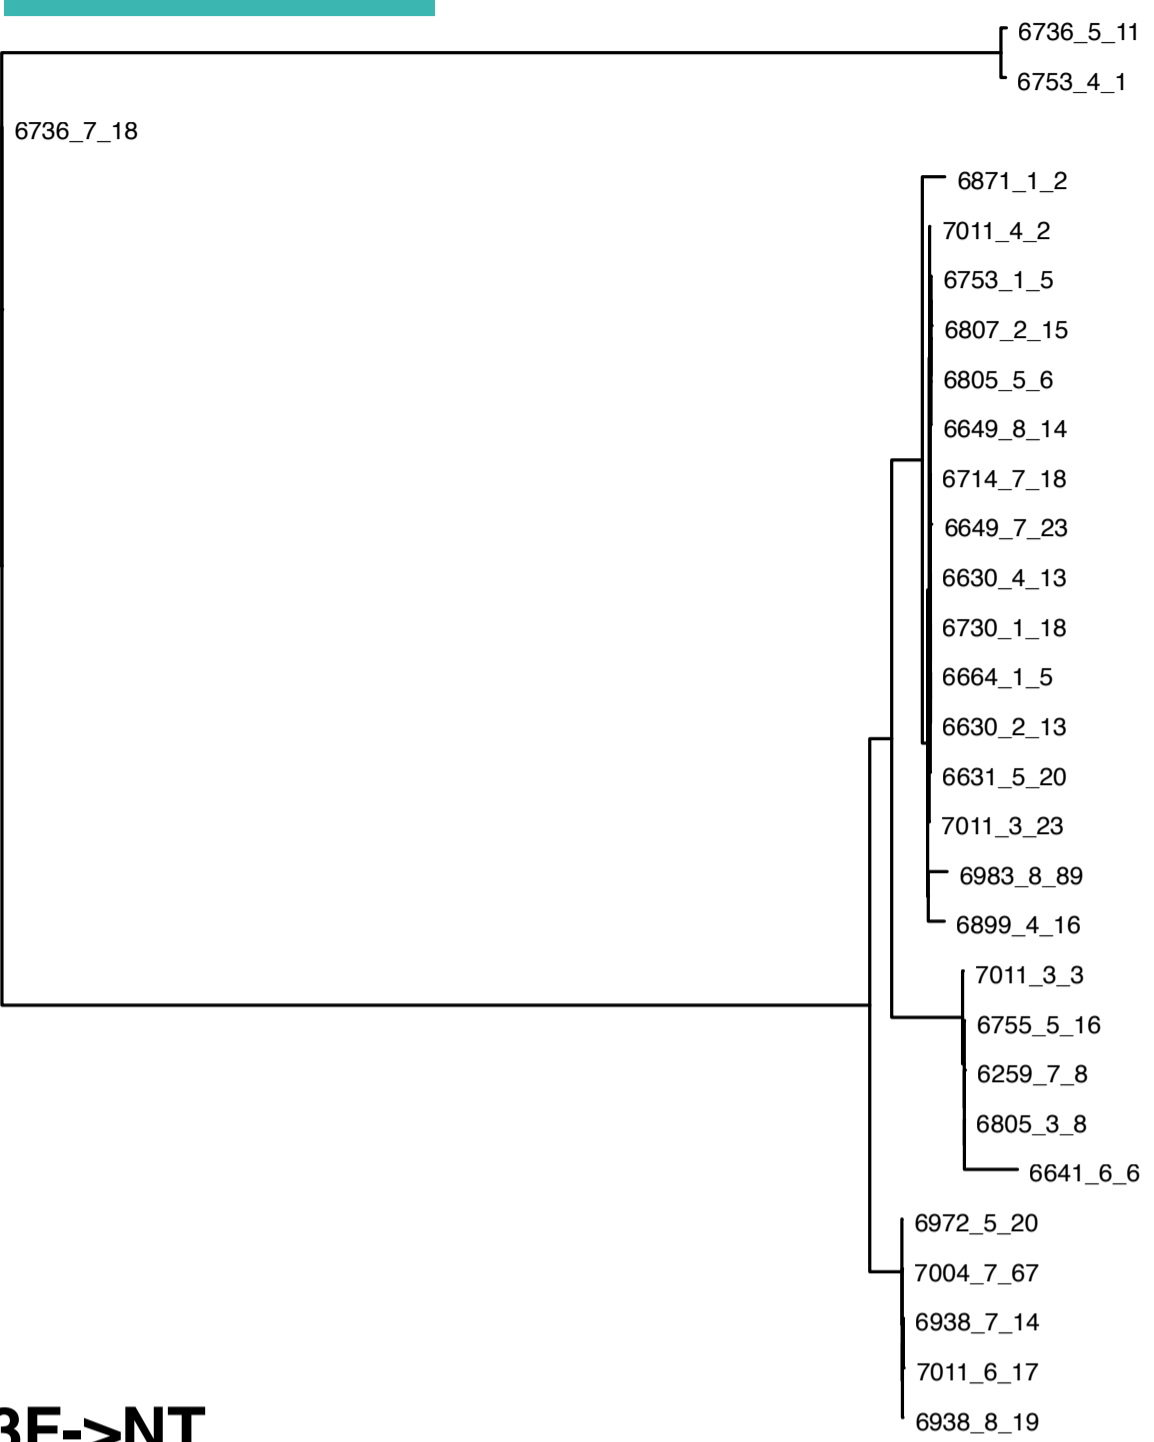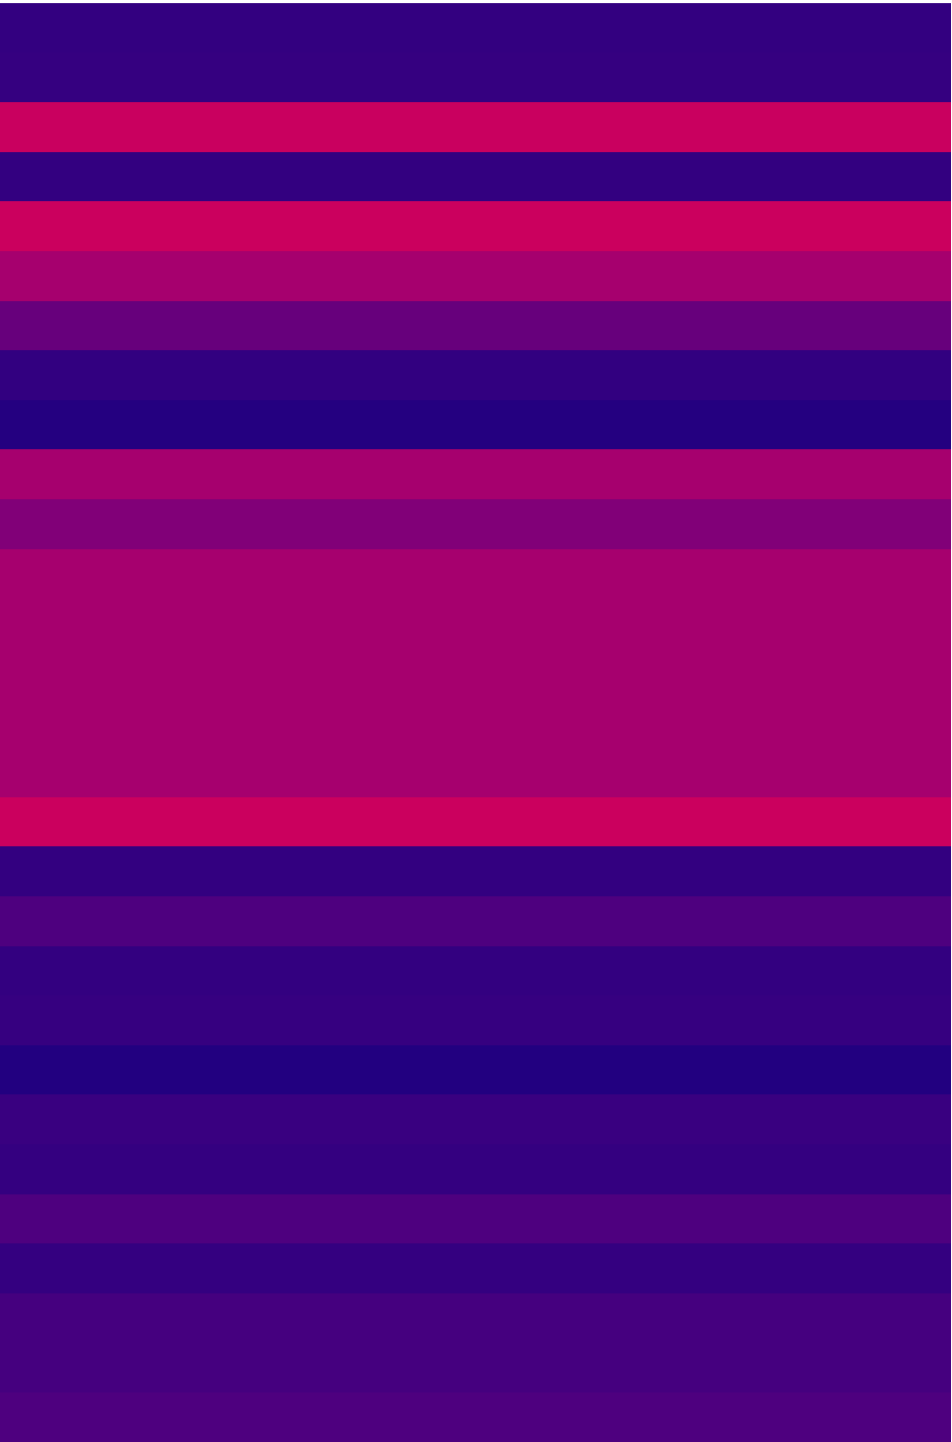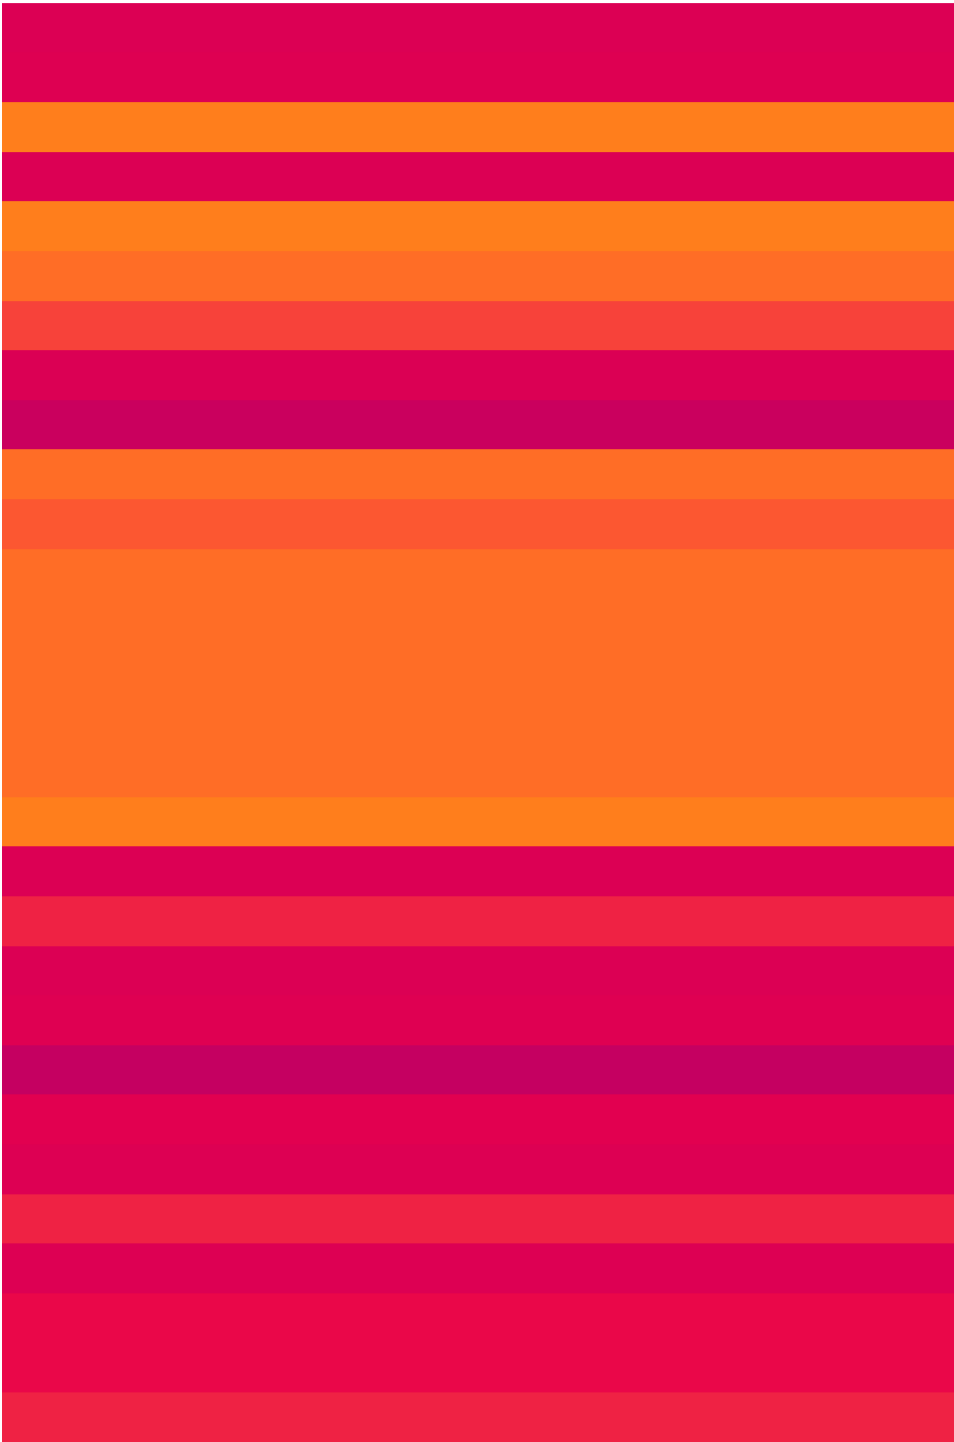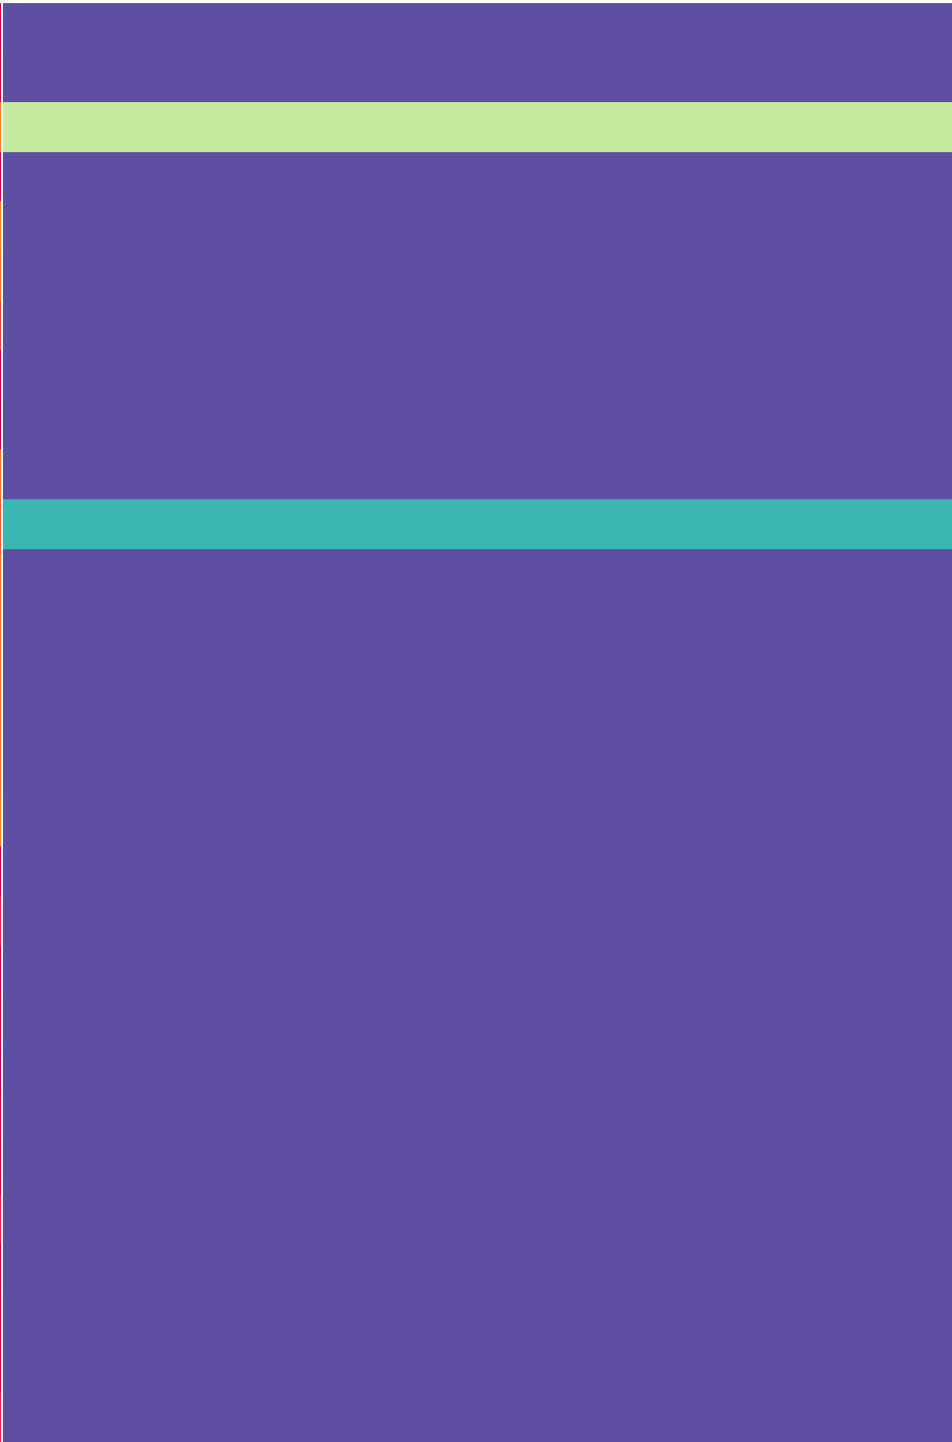

23F->NT

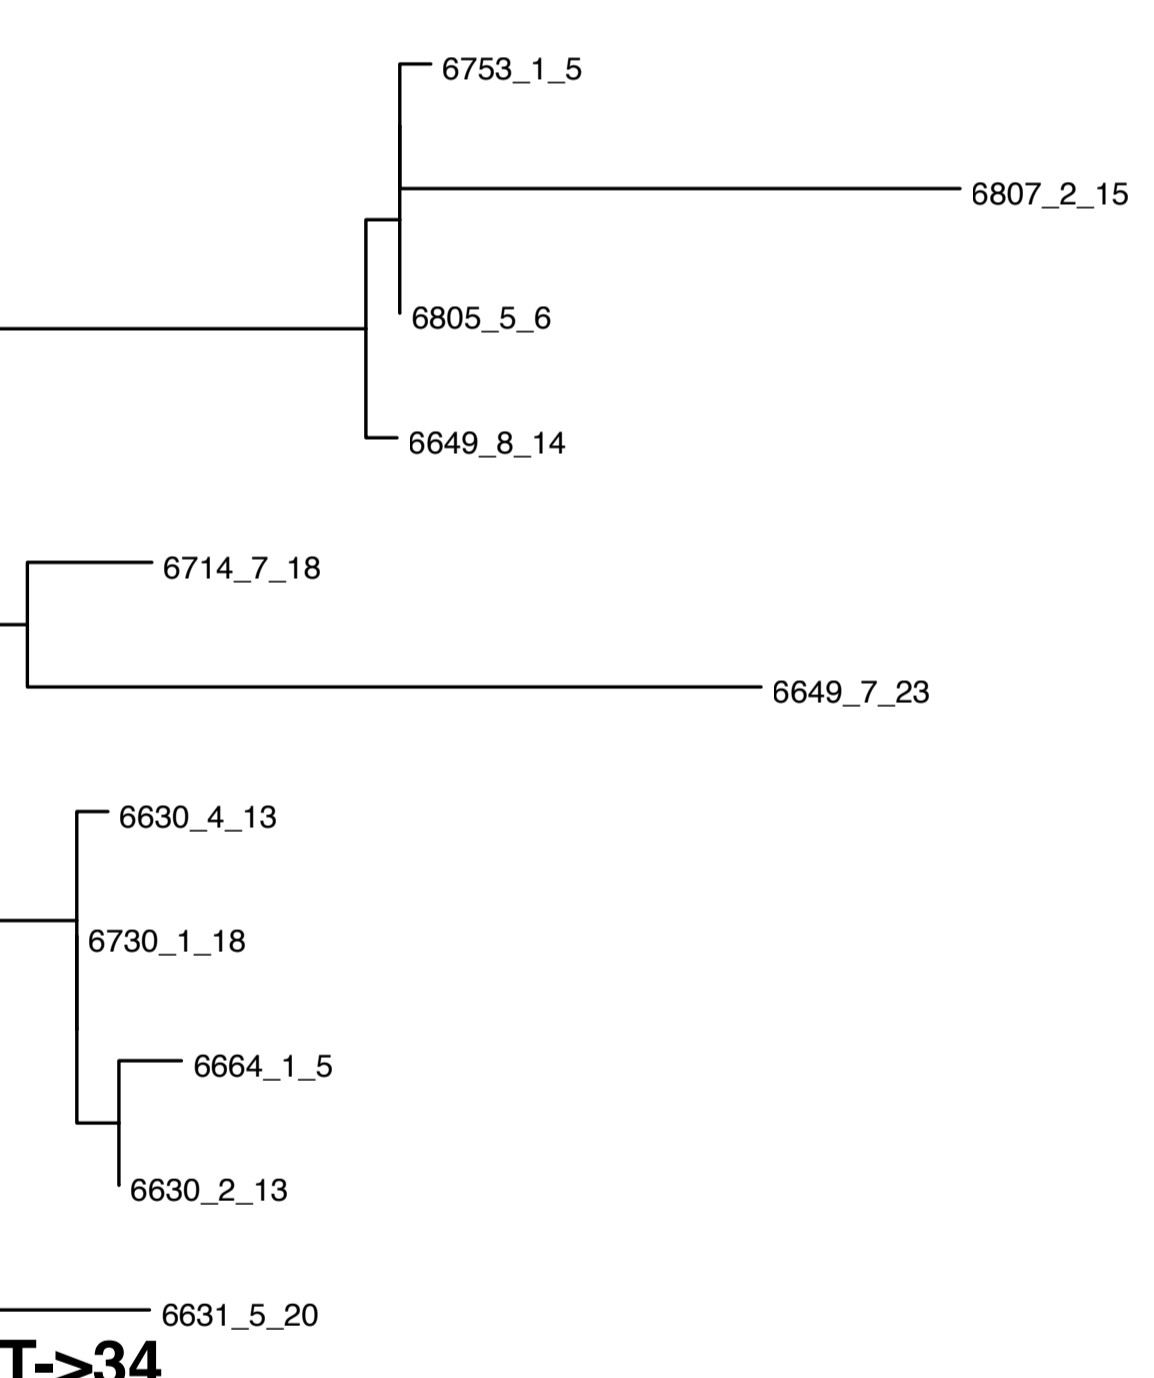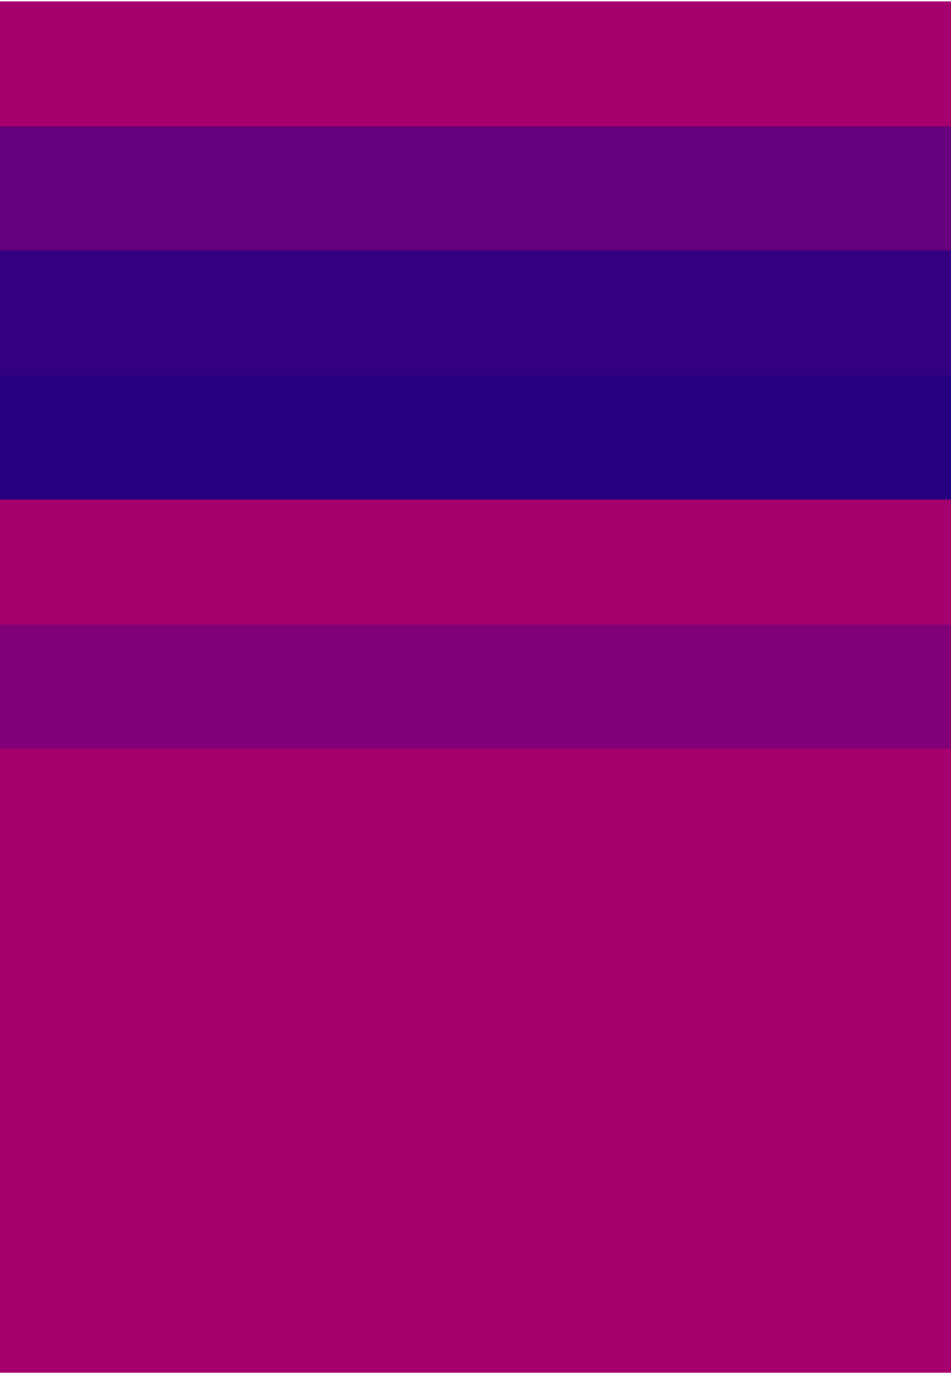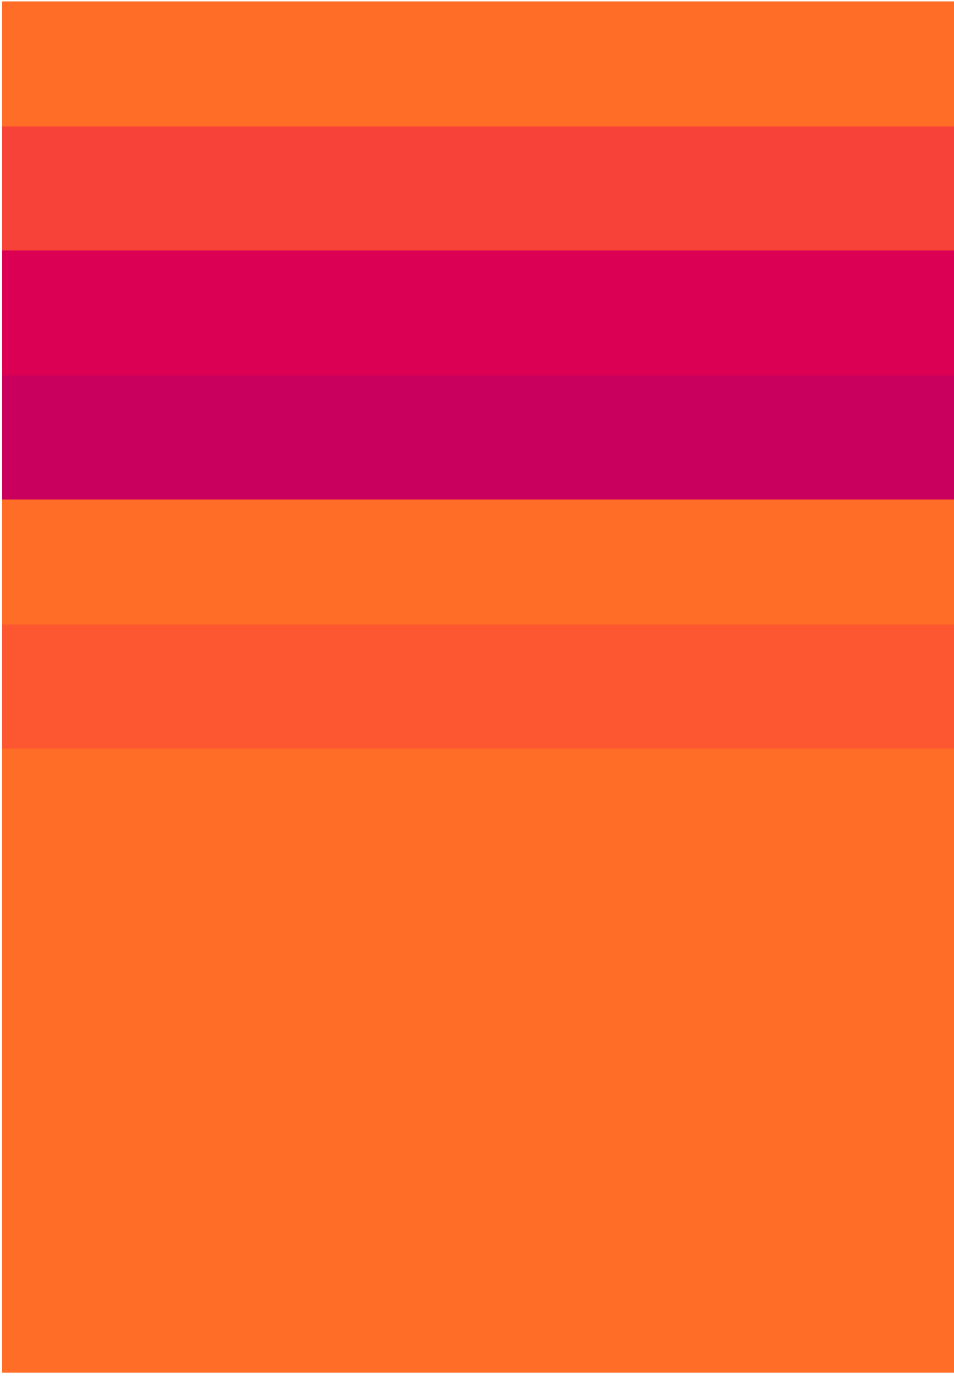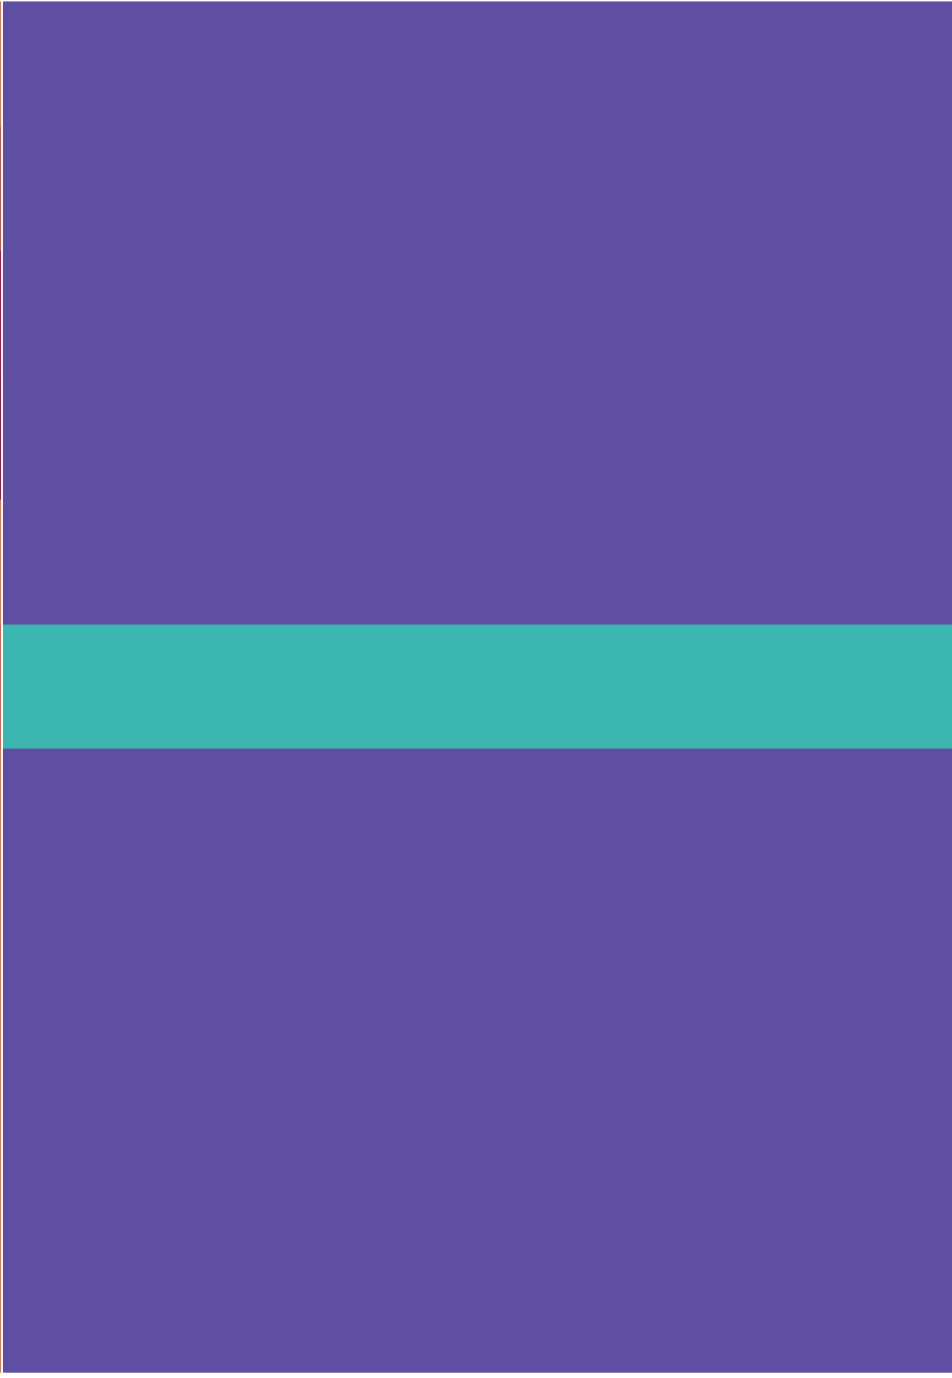

NT->34

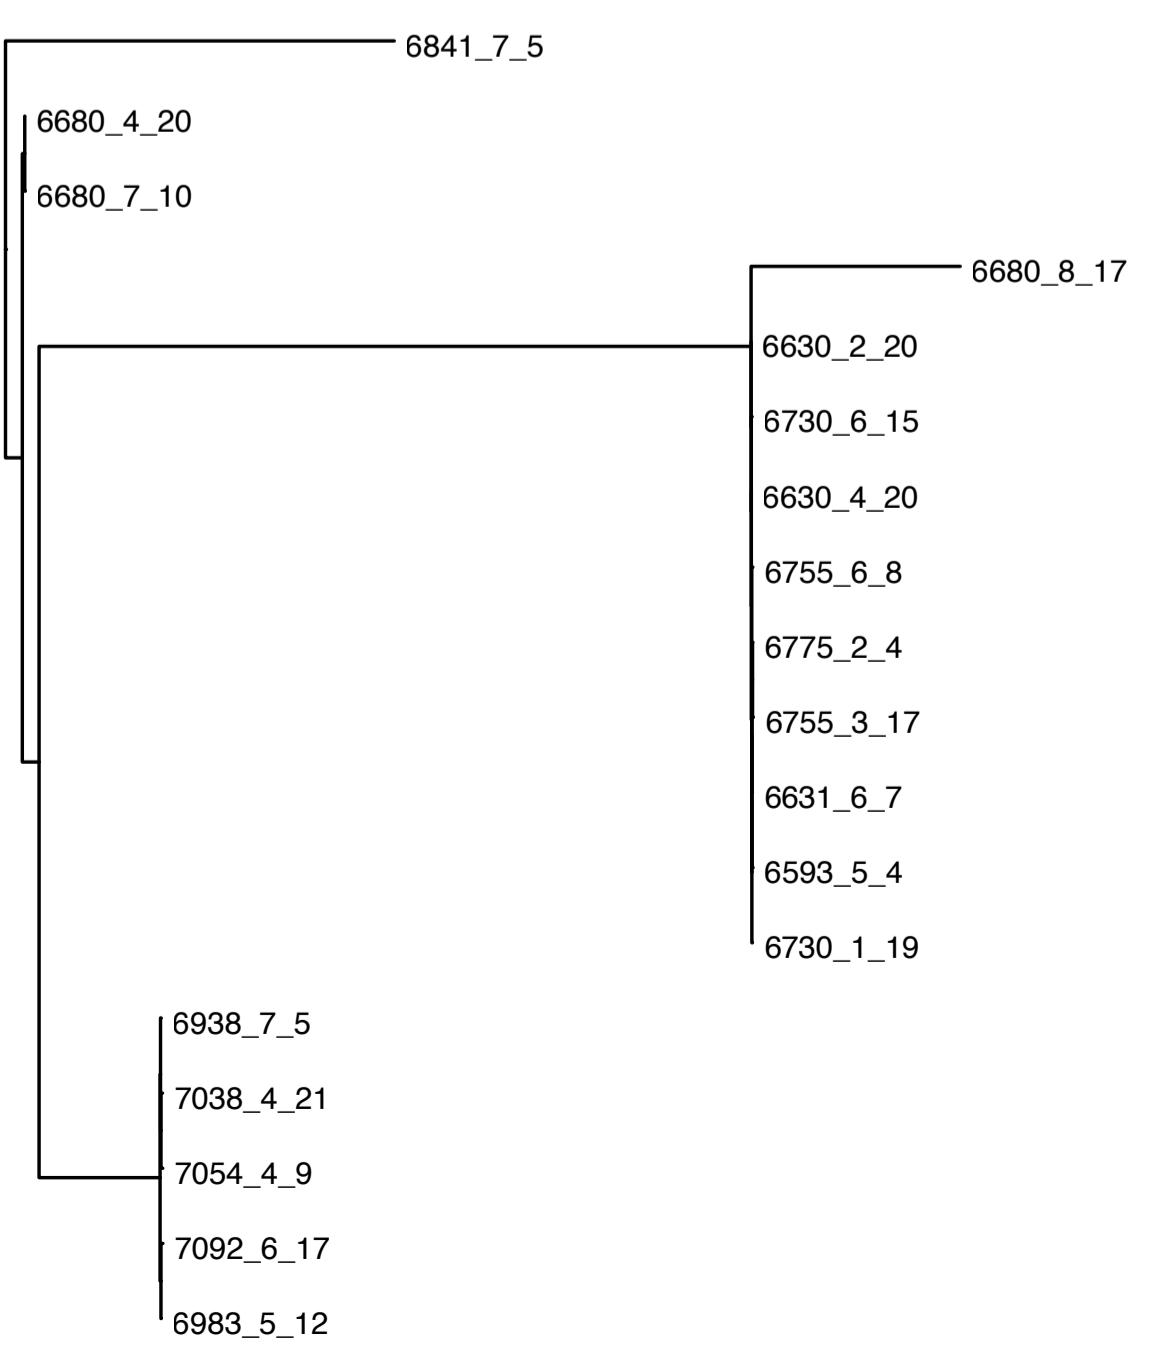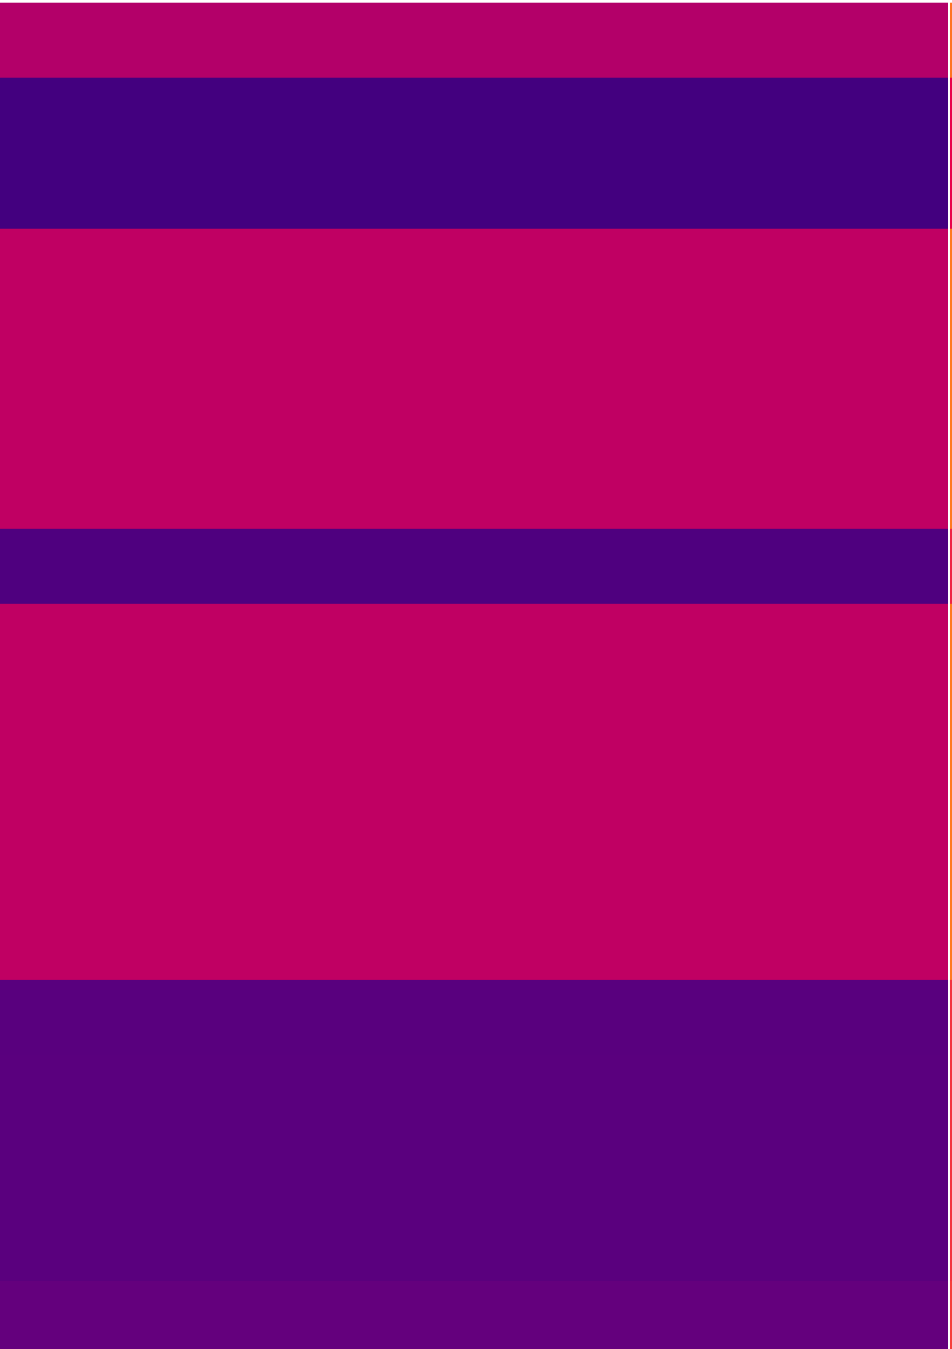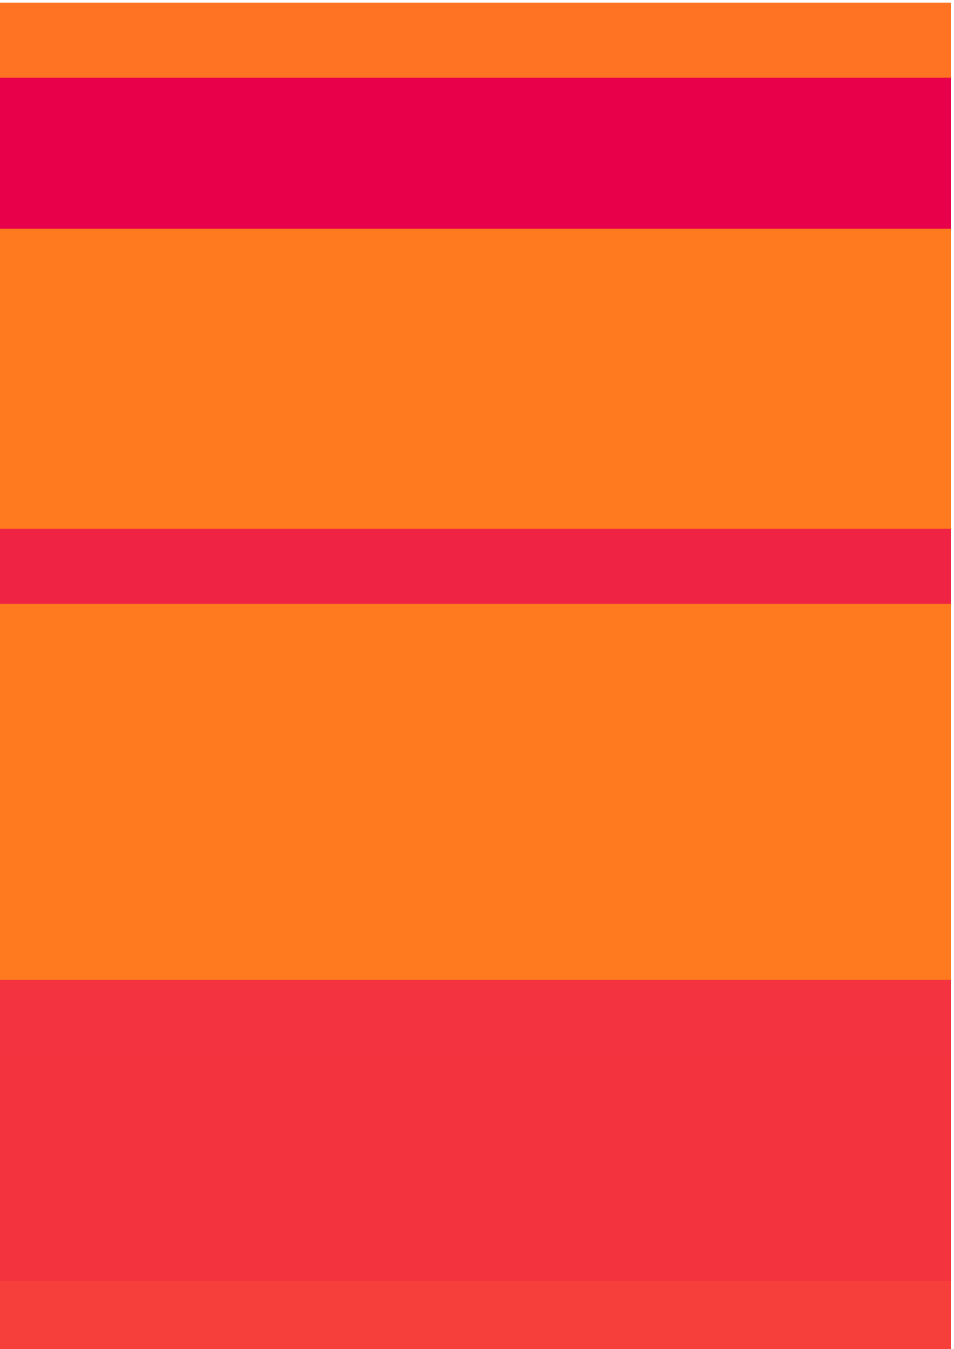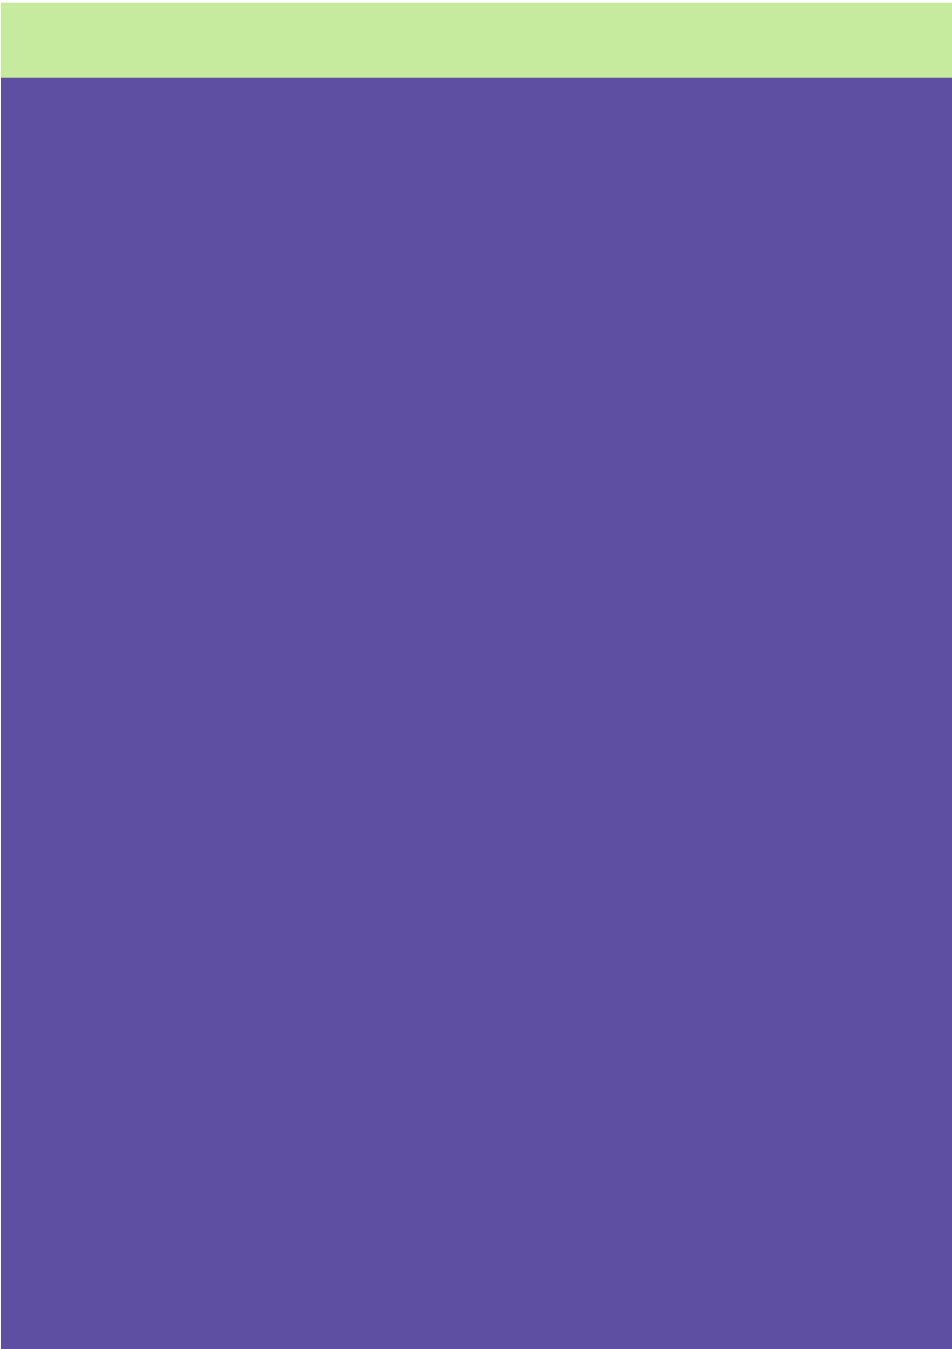

23F->NT
