# Supplementary material for: Genome-wide identification of lineage and locus specific variation associated with pneumococcal carriage duration
Source: eLife journal article supplement (doi:10.7554/elife.26255), 2017-07-25
Supplement: supp [file elife-26255-supp-v1.zip › elife_poa_e26255_Figure_4_source_data_1.txt]

((((((((((((((6680_7_4:0.000106321,7004_6_30:0.000149541)1.000:0.090005256,((6736_5_11:0.000323098,6753_4_1:0.000276635)1.000:0.058735585,(((6972_5_20:1.0668e-05,(7004_7_67:2.7338e-05,((6938_7_14:1.5867e-05,7011_6_17:4.8093e-05)0.997:5.441e-05,6938_8_19:3.4605e-05)0.414:1.5486e-05)0.744:1.6846e-05)1.000:0.001889181,((6871_1_2:0.001321018,(((7011_4_2:1.5044e-05,((((6753_1_5:3.633e-06,6807_2_15:6.554e-05)0.059:6e-09,6805_5_6:6e-09)0.758:3.96e-06,6649_8_14:3.646e-06)0.999:4.3642e-05,((6714_7_18:1.457e-05,6649_7_23:8.583e-05)0.775:4.037e-06,((6630_4_13:3.648e-06,(6730_1_18:6e-09,(6664_1_5:7.32e-06,6630_2_13:6e-09)0.852:4.922e-06)0.776:6e-09)0.848:9.811e-06,6631_5_20:1.8323e-05)0.553:6e-09)0.856:6e-09)0.984:3.956e-05)0.915:2.4537e-05,7011_3_23:1.2945e-05)0.971:9.1471e-05,(6983_8_89:0.0011102,6899_4_16:0.000945013)0.327:3.903e-05)0.994:0.000310921)1.000:0.001801418,(7011_3_3:4.4518e-05,(6755_5_16:2.4584e-05,(6259_7_8:6.9108e-05,(6805_3_8:1.2969e-05,6641_6_6:0.00312412)0.709:3.827e-06)0.733:4.244e-06)1.000:0.000100102)1.000:0.00416638)0.881:0.001289755)0.999:0.05101084,6736_7_18:6e-09)0.513:1.3135e-05)1.000:0.024106929)1.000:0.019586092,(((6730_3_5:8.768e-06,(6755_5_5:1.4191e-05,6755_3_18:1.7721e-05)0.735:8.927e-06)1.000:0.018285437,(((6823_1_7:0.007619351,((6925_6_24:1.1652e-05,(6680_6_6:1.9098e-05,6938_7_4:2.5695e-05)0.444:1.163e-05)0.864:1.3518e-05,(6899_7_7:9.553e-06,6938_8_10:3.8038e-05)0.000:6e-09)1.000:0.002835625)1.000:0.003945203,(6680_6_11:0.017502903,6736_6_9:0.026892499)1.000:0.003284896)1.000:0.025302656,(((6631_4_9:0.015952599,((((6680_4_18:0.0185169,((6664_1_3:0.000346095,6775_1_5:0.00919784)1.000:0.009911397,(6805_4_9:3.053e-06,6807_3_3:2.8938e-05)1.000:0.038265614)0.851:0.001015847)1.000:0.001333004,(6680_4_14:0.003627776,6925_6_9:0.01284679)1.000:0.002030292)1.000:0.001394587,((6925_3_2:2.9232e-05,7038_8_26:1.6102e-05)1.000:0.019924782,((7011_5_10:1.7151e-05,7038_4_13:1.535e-05)1.000:0.011842131,(((6841_7_20:0.002584868,(6983_3_71:1.6749e-05,6823_5_7:1.5535e-05)1.000:0.000295673)1.000:0.001597443,((6807_3_5:2.9513e-05,6830_3_21:8.819e-06)1.000:0.000789646,(6938_6_2:1.0509e-05,6938_7_16:7.242e-06)1.000:0.000570102)0.961:6.0725e-05)1.000:0.000210846,(6630_1_4:6e-09,6649_8_1:6.959e-06)1.000:0.003957624)1.000:0.005427075)1.000:0.010901821)1.000:0.001418346)1.000:0.000524221,(((6710_6_11:0.00619434,6823_4_17:0.002936866)1.000:0.001272191,(6731_6_15:0.006686167,(6630_2_18:0.002454277,6680_8_10:0.000704854)1.000:0.007987751)1.000:0.023190382)1.000:0.014218834,(6673_8_24:0.003560585,((6949_2_12:0.007090701,((6631_3_6:4.6199e-05,6736_7_7:4.1533e-05)1.000:0.016123201,(6680_5_9:1.4115e-05,6938_3_28:3.277e-05)1.000:0.003908791)1.000:0.002474968)1.000:0.010176216,((6730_8_1:0.000873484,6972_3_17:0.017000421)1.000:0.02513396,(6631_2_10:1.5853e-05,6649_7_11:1.9252e-05)1.000:0.008244165)1.000:0.003409748)1.000:0.004697336)0.256:0.000591742)1.000:0.002594696)1.000:0.00114176)1.000:0.000642033,(6649_8_11:0.01648387,6807_3_8:0.030549897)1.000:0.001509773)1.000:0.001027287,(((6938_7_8:1.6644e-05,7038_4_8:1.2795e-05)0.507:1.0288e-05,(7011_5_5:9.464e-06,7004_5_23:1.8045e-05)0.754:4.918e-06)1.000:0.034560546,(6680_6_21:0.015971564,(6805_6_21:0.000623721,((6730_1_10:1.4004e-05,6630_1_20:5.2721e-05)0.767:3.466e-06,(6649_8_17:1.3994e-05,6631_4_22:0.004760948)0.748:3.551e-06)1.000:0.000455718)1.000:0.003502812)1.000:0.004853015)1.000:0.002038367)1.000:0.005167876)1.000:0.022096196)1.000:0.023052639,(((6755_2_5:1.0788e-05,6805_4_1:2.9085e-05)1.000:0.031314387,(7011_6_6:0.024081232,((6899_7_24:0.029951235,(((6631_1_22:0.000188184,(6680_4_7:0.003705791,6714_7_21:1.5e-07)1.000:0.006122801)1.000:0.000651258,(((6841_7_5:0.00619289,((6680_4_20:6.52e-07,6680_7_10:7.274e-06)0.954:3.8892e-05,((6680_8_17:0.003332317,(6630_2_20:6e-09,(6730_6_15:1.4206e-05,(6630_4_20:6e-09,(6755_6_8:1.7681e-05,((((6775_2_4:4.987e-06,6755_3_17:1.2733e-05)0.515:7.088e-06,6631_6_7:5.014e-06)0.161:6e-09,6593_5_4:1.6243e-05)0.448:3.555e-06,6730_1_19:8.578e-06)0.728:2.046e-06)0.434:7.073e-06)1.000:2e-08)0.867:3.599e-06)0.726:6e-09)1.000:0.011341725,((6938_7_5:1.068e-05,(7038_4_21:2.4998e-05,7054_4_9:2.9054e-05)0.405:7.266e-06)0.385:7.344e-06,(7092_6_17:3.0984e-05,6983_5_12:4.404e-06)0.806:1.4472e-05)1.000:0.001927242)1.000:0.000266819)0.952:0.000267906)1.000:0.011345137,((((6823_3_17:2.901e-05,6753_4_4:3.547e-06)0.872:8.625e-06,(6807_2_18:7.223e-06,6823_7_16:2.0616e-05)0.784:6.592e-06)1.000:0.000547681,(6753_2_6:2.9215e-05,6949_4_11:4.5727e-05)0.945:4.454e-05)1.000:0.006995699,(6731_6_7:7.7427e-05,((6631_3_18:7.677e-05,(6823_2_20:1.1877e-05,6938_3_24:2.6431e-05)1.000:9.1844e-05)0.926:1.4617e-05,6680_7_14:1.5512e-05)0.897:1.3883e-05)1.000:0.001667399)1.000:0.001908771)0.759:1.4417e-05,(6925_7_2:1.1005e-05,6983_4_95:2.9442e-05)1.000:0.006041714)1.000:0.00391586)1.000:0.001036377,((((6730_3_24:8.5917e-05,(6730_1_12:1.3694e-05,6714_7_12:1.6856e-05)1.000:9.8082e-05)0.505:2.859e-06,6673_8_21:0.0003866)0.733:1.3003e-05,6925_4_17:8.5094e-05)0.996:5.2935e-05,(6823_3_23:0.000100001,6680_4_15:7.6773e-05)0.988:3.4358e-05)1.000:0.006085271)1.000:0.003951049)1.000:0.002971106,(6807_1_14:0.00256871,((6938_6_17:0.000161877,7092_6_16:5.0547e-05)1.000:0.030524686,(6631_5_24:0.002885829,(6823_6_10:0.007365313,6805_4_23:0.001901962)0.282:0.000531858)1.000:0.005137594)1.000:0.014827561)1.000:0.006947589)1.000:0.004288897)1.000:0.008913745)1.000:0.038537942,((6641_6_4:0.046542501,6938_7_1:0.057059219)1.000:0.007477861,(((6823_7_5:0.038622068,((6972_4_5:3.656e-06,(6983_8_92:3.964e-06,6983_4_84:2.4443e-05)0.847:7.305e-06)1.000:0.000459016,(6805_3_20:0.001465729,(6925_3_1:0.000139359,6938_7_2:2.599e-05)1.000:0.002986988)1.000:0.002920072)1.000:0.00780506)1.000:0.012785685,(6630_1_13:0.024548616,6755_5_2:0.013907492)1.000:0.006346916)1.000:0.020825618,(6259_5_1:0.03868071,6807_3_15:0.034151764)1.000:0.00675971)1.000:0.005305091)1.000:0.014692466)0.454:0.003274738)1.000:0.006104322)1.000:0.005097019,(((((6925_4_19:1.0581e-05,6949_1_18:3.288e-06)1.000:0.001722913,(((6731_2_24:7.341e-06,6736_4_14:1.4037e-05)0.928:9.8693e-05,(6938_5_10:1.2095e-05,7011_3_2:1.0449e-05)0.936:1.9704e-05)0.969:0.000179957,(6631_1_19:7.552e-06,6730_3_16:2.7343e-05)0.971:4.7239e-05)0.979:8.2067e-05)1.000:0.038435444,((7004_7_57:9.461e-06,((6753_3_16:6e-09,((((6755_5_1:0.000131944,(6631_4_6:3.253e-06,6925_7_5:1.2819e-05)1.000:4.7742e-05)0.688:6e-09,((6731_4_22:1.3061e-05,(6736_7_1:1.2805e-05,(6680_4_3:1.0908e-05,6755_6_13:6.67e-06)0.162:6e-09)0.867:9.622e-06)0.995:3.7211e-05,(6631_5_21:6e-09,(6593_5_2:9.421e-06,6805_2_23:9.49e-06)0.000:6e-09)1.000:8.2659e-05)0.990:2.7935e-05)0.760:6e-09,(6823_7_12:1.2377e-05,(7038_5_2:1.0453e-05,6972_2_14:3.363e-06)0.970:2.0181e-05)1.000:0.000129895)1.000:3.3089e-05,6775_2_15:3.058e-06)0.899:6.617e-06)0.000:6e-09,(6899_7_21:6e-09,((6972_5_1:6.078e-06,6949_1_22:3.039e-06)0.770:3.037e-06,6823_3_12:3.045e-06)0.000:6e-09)0.978:1.2213e-05)0.836:6e-09)1.000:0.033230179,(((6259_8_21:9.134e-06,6649_8_4:1.0725e-05)1.000:0.000183968,((6710_8_17:1.3925e-05,(6925_6_22:1.3023e-05,6983_4_91:3.409e-06)0.999:4.2612e-05)0.835:1.098e-05,(6938_6_12:9.803e-06,(6259_7_14:3.9433e-05,6259_6_2:3.6454e-05)0.318:7.122e-06)1.000:0.00013174)1.000:0.000978791)1.000:0.006828621,((((((6630_1_17:9.507e-06,6649_8_19:1.3574e-05)0.744:3.392e-06,(6805_5_9:6.628e-06,6730_7_15:6.314e-06)0.916:1.1963e-05)0.999:5.5789e-05,(6805_5_19:9.544e-06,6755_6_10:1.3105e-05)0.993:2.3448e-05)0.000:6e-09,6755_2_15:7.375e-05)0.735:4.088e-06,(((6593_4_9:3.206e-06,(6593_4_18:1.2634e-05,6259_6_20:3.7346e-05)0.782:3.332e-06)0.953:1.3989e-05,6259_6_18:7.4302e-05)0.882:1.111e-05,(6753_4_24:9.667e-06,(6840_1_5:9.61e-06,6899_5_23:1.2559e-05)0.947:1.2682e-05)0.970:1.8146e-05)0.982:3.0992e-05)1.000:0.002328935,((((7004_6_37:1.9804e-05,(((6983_6_35:3.934e-06,(7038_8_36:6.503e-06,(((6805_6_14:6.807e-06,(6755_3_2:1.799e-05,(6731_6_12:6.512e-06,6731_2_17:1.6296e-05)0.999:5.065e-05)0.956:1.6883e-05)0.799:6.511e-06,6807_3_21:3.246e-06)0.650:6e-09,6949_3_17:1.952e-05)0.257:6.768e-06)0.880:6.79e-06)0.772:5.446e-06,7054_6_22:7.19e-06)0.663:1.0847e-05,6983_5_2:1.1988e-05)0.745:7.081e-06)0.943:2.3626e-05,7038_4_2:0.001898395)1.000:0.001165803,(((((6710_7_24:1.8558e-05,6823_2_3:6.777e-06)0.776:9.565e-06,((6823_1_24:3.262e-06,(6840_1_15:3.262e-06,(6823_4_22:3.275e-06,(6983_8_78:8.585e-06,(6925_6_6:1.579e-05,6925_6_10:1.1015e-05)0.434:4.408e-06)0.788:6.059e-06)0.787:4.437e-06)0.000:6e-09)0.944:1.025e-05,(7038_6_19:1.6382e-05,7038_6_9:4.1917e-05)0.077:6e-09)0.773:5.702e-06)0.984:2.6471e-05,((6823_7_15:3.719e-06,6823_7_9:1.2439e-05)0.959:1.9542e-05,((6949_1_13:1.3088e-05,6983_4_89:1.2532e-05)0.758:7.141e-06,6925_6_14:1.314e-05)0.907:1.5807e-05)0.744:5.495e-06)1.000:0.000684405,(6938_7_24:0.007072247,6631_6_15:0.001998862)0.565:0.00013037)1.000:0.000201555,(((6925_8_20:3.751e-06,((((6949_4_20:3.246e-06,(6972_3_10:6e-09,6949_1_4:1.2989e-05)0.459:8e-09)0.435:9.914e-06,(6775_1_2:6e-09,((6753_4_22:3.256e-06,(6753_1_3:6.503e-06,(6823_1_10:2.5284e-05,6871_2_14:6.49e-06)0.776:7.187e-06)0.370:6e-09)0.000:6e-09,(6805_4_8:6.508e-06,6805_7_16:3.255e-06)0.000:6e-09)0.990:1.941e-05)0.976:1.9282e-05)0.795:6.503e-06,6949_2_20:6.734e-06)0.760:5.222e-06,7004_6_26:1.5792e-05)0.435:4.832e-06)0.927:1.2332e-05,((7004_5_8:1.279e-05,7004_8_93:2.2661e-05)0.000:6e-09,7004_5_10:3.254e-06)0.560:3.47e-07)1.000:0.00312197,7054_6_16:4.1834e-05)0.858:1.6649e-05)0.974:5.3148e-05)1.000:0.003014201,((6925_5_12:9.883e-06,(6938_8_4:9.767e-06,7011_4_20:1.0549e-05)0.888:7.012e-06)0.987:2.8405e-05,(((6983_6_39:9.744e-06,(6938_8_17:6.392e-06,6972_5_19:9.546e-06)0.875:6.383e-06)0.750:3.26e-06,6925_8_6:1.2884e-05)1.000:0.00016827,(6938_7_23:6.607e-06,6938_7_22:6.43e-06)0.907:9.754e-06)0.998:4.1182e-05)1.000:0.007005956)1.000:0.004074876)1.000:0.012011013)1.000:0.019117852)1.000:0.012712425)1.000:0.005332909,(((((6925_7_10:6.723e-06,6972_4_22:6e-09)0.844:7.708e-06,((((7054_6_21:1.8095e-05,((7004_7_58:2.3143e-05,7054_4_11:2.0579e-05)0.748:3.352e-06,7011_6_11:3.948e-06)0.852:7.858e-06)0.932:2.0968e-05,(7068_4_9:1.5617e-05,7054_4_15:7.92e-06)0.226:6.703e-06)0.864:1.0199e-05,7068_4_13:1.6914e-05)0.316:8.129e-06,6925_7_20:1.6684e-05)0.698:4.014e-06)1.000:0.001699583,((6899_7_9:1.7919e-05,(6983_4_86:0.0013095,((6899_6_24:1.008e-05,6823_7_1:9.662e-06)0.638:6e-09,6805_3_6:2.0311e-05)0.895:9.542e-06)0.958:8e-09)0.497:5.411e-06,(((((6949_4_3:8.159e-06,6938_6_24:5.5607e-05)0.442:1.0968e-05,6972_4_24:6e-09)0.923:1.786e-05,(6938_5_16:3.6992e-05,6841_7_21:1.4904e-05)0.937:1.2431e-05)0.751:4.113e-06,(7004_6_25:8.355e-06,(7054_4_23:8.865e-06,7068_4_4:2.8504e-05)0.713:9.214e-06)0.435:6.795e-06)0.412:6.864e-06,(6807_3_7:3.2677e-05,6925_6_3:1.2329e-05)0.774:5.216e-06)0.749:3.36e-06)0.995:0.000107262)1.000:0.00876256,(7038_6_14:0.006571947,(6753_1_9:1.1458e-05,7068_4_22:1.8318e-05)1.000:0.004489937)1.000:0.00221561)1.000:0.01885095,((6730_4_15:2.5377e-05,(((7004_5_15:1.0397e-05,7004_8_90:2.2199e-05)0.814:1.1329e-05,7011_4_13:7.834e-06)1.000:7.6404e-05,6983_4_75:2.724e-06)0.620:3.3859e-05)1.000:0.040913124,((((6972_5_22:1.7759e-05,6949_2_17:1.3529e-05)0.745:5.918e-06,(6938_8_15:6.766e-06,7004_8_73:6.783e-06)0.759:3.398e-06)0.743:6.782e-06,6925_3_15:1.6996e-05)1.000:0.012937878,(((((6899_4_11:1.6268e-05,(6949_1_5:3.2581e-05,6823_5_12:1.027e-05)0.735:5.874e-06)0.762:4.983e-06,6925_6_16:1.2815e-05)1.000:0.005512613,(6680_6_12:0.001258989,(6949_2_9:0.002447561,(6680_4_19:1.0298e-05,(6731_1_6:6.827e-06,6680_6_9:1.0327e-05)0.431:3.496e-06)0.827:9.871e-06)1.000:0.004580867)1.000:0.000967368)1.000:0.0009105,(7038_4_12:0.003355848,((7038_4_18:1.1485e-05,6949_4_17:2.2023e-05)1.000:0.000101562,(6630_4_9:3.6448e-05,(6710_6_15:4.89e-06,(6805_7_22:0.001320031,(6823_1_9:1.4674e-05,6823_4_4:2.7007e-05)0.000:8e-09)0.376:6.516e-06)0.984:3.3812e-05)0.978:3.5821e-05)1.000:0.008462882)1.000:0.001322143)1.000:0.004683662,((7004_5_7:1.3649e-05,7011_5_17:2.0529e-05)1.000:0.008175541,((((((6949_4_10:1.185e-05,6925_7_24:1.0805e-05)0.997:5.9155e-05,((6649_8_10:5.644e-06,6630_3_2:9.24e-06)0.894:1.4795e-05,6736_5_13:4.3326e-05)0.876:1.7336e-05)0.994:5.5083e-05,6841_7_16:1.8117e-05)0.805:2.0079e-05,((7068_4_23:6e-09,6899_4_19:1.1646e-05)0.951:1.9257e-05,6755_4_17:3.0547e-05)0.995:4.6903e-05)0.445:6e-09,((6730_1_16:1.7182e-05,(6823_4_19:2.6955e-05,6899_5_3:2.4832e-05)0.960:1.7494e-05)1.000:0.002193239,((6664_1_13:4.0562e-05,(((6736_4_20:0.000150861,(6631_2_7:6.957e-06,6649_7_10:7.05e-06)1.000:0.000405266)0.291:7.168e-06,((7011_5_22:2.1383e-05,(((6630_1_10:1.0303e-05,6755_3_10:0.000312285)0.895:1.7779e-05,6630_3_1:2.0671e-05)0.156:6e-09,6631_5_1:6.848e-06)0.922:2.816e-05)1.000:0.000121174,6775_1_11:0.000191397)0.933:0.00010193)1.000:0.000143779,(6736_5_23:2.033e-05,((6755_2_10:6e-09,6775_1_18:1.357e-05)0.995:2.8533e-05,(6710_6_8:3.39e-06,6736_5_21:6e-09)1.000:4.405e-05)0.091:6e-09)0.710:3.558e-06)0.869:1.3515e-05)0.854:1.6431e-05,((7068_4_20:3.3284e-05,6899_5_5:5.1848e-05)0.962:2.9111e-05,7038_6_17:4.3109e-05)0.887:1.4233e-05)0.752:4.926e-06)0.838:8.431e-06)0.991:0.000160681,(((6593_5_13:1.5794e-05,6631_1_4:1.6725e-05)0.455:4.001e-06,(6731_1_22:1.0077e-05,(6631_3_1:1.1e-08,6664_1_8:6e-09)0.649:8.5e-08)0.509:1.5e-08)1.000:0.005389912,(6925_5_18:1.6877e-05,(6805_5_15:1.0086e-05,(6823_2_12:6e-09,6823_2_11:3.351e-06)0.768:3.326e-06)0.680:1.0126e-05)1.000:0.003436398)0.591:8.0542e-05)0.832:0.000465745)1.000:0.005433007)1.000:0.009234953)1.000:0.004353643)1.000:0.011997937)1.000:0.022333842)1.000:0.004619842,(((7054_6_4:6e-09,7068_4_8:0.001652666)1.000:0.005112602,((6899_5_4:1.3123e-05,(6823_1_20:6e-09,6823_6_14:1.9712e-05)0.879:1.3184e-05)0.990:3.1496e-05,(((6840_3_8:1.1378e-05,7038_8_32:2.3063e-05)0.947:1.5048e-05,(6983_5_5:2.3184e-05,6823_5_8:6.609e-06)0.725:3.376e-06)1.000:0.000319969,6731_1_9:0.001171755)1.000:0.000116994)1.000:0.001059174)1.000:0.038075772,6972_4_10:0.052710428)1.000:0.009493555)1.000:0.002880017)1.000:0.003348398,((((((((((((6680_7_22:0.000126194,(((6630_4_14:3.608e-06,6775_2_24:1.9472e-05)0.524:6e-09,(6983_8_80:2.8025e-05,(6830_3_5:5.2504e-05,(6730_6_11:2.0643e-05,(6730_3_1:6.327e-06,6871_1_17:3.4706e-05)0.807:9.688e-06)0.065:6e-09)0.847:8.194e-06)0.193:6e-09)0.949:1.7756e-05,(((6899_7_20:6.873e-06,(7011_6_7:8.008e-06,(7004_7_55:1.0451e-05,(6949_1_17:8.705e-06,6983_5_13:6e-09)0.912:8.811e-06)0.447:8.3e-08)0.326:5.134e-06)0.938:1.5443e-05,((6899_7_15:6.94e-06,6925_6_12:6.943e-06)0.802:3.456e-06,((6823_2_10:1.777e-05,(6840_1_13:1.6157e-05,6823_2_1:6.938e-06)0.758:1.5e-08)0.772:8.234e-06,(6753_3_24:1.8824e-05,6823_5_6:1.1952e-05)0.737:1.591e-05)0.853:8e-09)0.926:1.1095e-05)0.948:1.6588e-05,((6983_4_82:5.2213e-05,(6925_7_9:4.461e-06,(6899_5_7:1.5018e-05,6949_3_18:3.477e-06)0.826:9.231e-06)0.978:3.244e-05)0.896:1.3167e-05,(6807_1_19:1.8271e-05,(6807_2_16:2.004e-05,7068_4_19:6e-09)0.735:5.178e-06)1.000:0.00016546)0.515:6e-09)0.881:1.9681e-05)0.723:1.2302e-05)0.947:6.6254e-05,((((6736_8_8:2.8163e-05,(((6680_5_22:6.951e-06,(6736_8_9:2.1083e-05,(6840_1_20:2.9428e-05,((6925_6_13:6.963e-06,(6899_5_8:3.559e-06,6983_3_65:6e-09)0.861:7.182e-06)0.808:6.777e-06,6925_5_1:1.0922e-05)0.743:8.4e-06)0.958:0.000209011)0.000:8e-09)0.973:0.000324321,(((((((6755_3_23:1.045e-05,6753_4_7:6e-09)0.782:9.197e-06,6736_6_10:3.495e-06)0.771:4.589e-06,(((((7054_5_6:4.762e-06,(6983_2_14:1.1046e-05,(7004_7_51:6.979e-06,7011_6_1:3.64e-06)0.928:1.4797e-05)1.000:0.000365562)0.775:2.1167e-05,7054_5_18:3.519e-06)0.842:1.311e-05,(((6823_5_24:6e-09,6983_5_17:6e-09)0.891:7.021e-06,6840_3_16:1.0761e-05)0.745:3.577e-06,(6899_7_17:2.4456e-05,(6938_3_22:1.6029e-05,6823_4_12:6.961e-06)0.910:4.5104e-05)0.836:2.6037e-05)0.946:5.7476e-05)0.000:8e-09,7054_4_24:3.512e-06)0.941:8.0941e-05,(6710_6_13:3.498e-06,(6731_5_3:2.4761e-05,(6925_5_13:0.0006098,7054_6_13:1.0914e-05)0.827:5.8754e-05)0.616:1.4792e-05)0.917:7.1103e-05)0.937:4.6089e-05)0.922:3.2551e-05,((6805_4_10:1.4138e-05,((6938_7_3:1.755e-05,(6823_4_2:7.022e-06,(6823_7_20:7.041e-06,((7004_7_71:2.815e-05,7038_8_39:1.0537e-05)0.515:6e-09,((6938_6_14:7.015e-06,7011_3_6:7.016e-06)0.778:1.0094e-05,(6972_5_21:6e-09,6949_2_4:7.025e-06)0.902:1.4566e-05)0.823:1.1306e-05)0.810:7.257e-06)0.863:9.071e-06)0.872:9.066e-06)0.986:2.6072e-05,(6680_5_17:0.000107252,(6753_1_17:1.0571e-05,6710_8_9:6e-09)0.759:3.519e-06)0.469:1.8859e-05)0.428:3.9354e-05)0.870:7.64e-05,6731_3_3:1.0505e-05)0.763:2.1592e-05)0.985:6.982e-05,6753_1_8:3.6159e-05)0.985:8.3373e-05,((((6730_4_18:3.448e-06,(6730_8_19:1.0515e-05,6775_2_12:1.4144e-05)0.783:6e-09)0.767:3.579e-06,6649_7_24:1.0341e-05)0.939:1.6629e-05,(6680_5_15:1.035e-05,6805_3_10:6.897e-06)0.974:1.7237e-05)0.916:1.7882e-05,(6823_1_18:3.569e-06,(6807_2_3:7.044e-06,6925_4_18:1.3985e-05)0.956:1.4121e-05)0.999:7.7782e-05)1.000:0.000161652)0.492:0.000132119,6736_5_6:3.5631e-05)0.998:0.000281206)0.999:0.000237473,6649_7_1:2.9638e-05)0.623:2.5372e-05)0.636:2.751e-05,(6736_4_16:0.000191568,((((7054_4_6:3.541e-06,(7011_6_10:2.1138e-05,6972_5_8:4.419e-06)0.774:6.595e-06)0.813:6.597e-06,(7092_6_20:6e-09,6972_5_15:3.486e-06)0.100:3.9e-08)0.713:3.357e-06,(7004_7_69:1.0537e-05,7092_6_22:1.0647e-05)0.881:7.079e-06)0.967:1.4185e-05,6925_7_18:6e-09)1.000:0.002765996)0.998:0.000501643)0.789:2.5287e-05,(((6731_3_19:1.7667e-05,6823_3_16:1.5866e-05)1.000:0.000206912,((6925_3_8:1.971e-05,(6925_3_11:4.994e-06,(6899_4_1:7.385e-06,(6807_2_6:1.4738e-05,7038_8_42:6.097e-06)0.333:5.606e-06)0.749:8.015e-06)0.872:1.056e-05)0.975:3.2096e-05,6775_1_10:0.000159924)0.533:2.0332e-05)0.881:0.000103314,(6807_2_7:1.2675e-05,6823_2_2:1.6201e-05)0.997:4.9403e-05)0.370:5.7096e-05)1.000:0.002935616,((6731_1_15:1.7582e-05,6731_4_18:6.966e-06)1.000:0.006528322,(6899_5_17:0.001245735,(6736_8_14:1.099e-05,((6871_1_1:1.0584e-05,6823_5_10:7.029e-06)1.000:0.00168587,(6925_5_23:1.193e-05,7011_4_3:8.181e-06)0.068:6e-09)0.875:1.4361e-05)1.000:0.001553085)1.000:0.000233034)0.989:9.33e-05)1.000:0.000303231)0.718:5.939e-06,(7092_6_7:5.2949e-05,(6730_1_6:3.436e-06,(6680_7_17:4.432e-06,6775_2_14:1.5478e-05)0.898:1.5481e-05)0.978:2.422e-05)0.939:2.653e-05)0.781:5.0845e-05,(((((6925_4_20:6e-09,(6949_3_20:9.28e-06,(6899_6_14:8.902e-06,6983_3_69:1.9726e-05)0.802:1.1364e-05)0.877:8.842e-06)0.865:9.282e-06,6925_4_6:3.569e-06)0.997:4.1607e-05,(6805_6_17:1.8178e-05,6840_3_2:1.9165e-05)0.997:4.3113e-05)0.858:9.15e-06,(6972_3_13:5.2621e-05,((6925_7_14:3.7567e-05,((6731_1_8:3.595e-06,6805_2_2:1.3643e-05)0.893:1.1778e-05,(6899_6_21:8.892e-06,(6807_3_1:2.5417e-05,6983_2_21:6e-09)0.826:1.6099e-05)0.426:6.549e-06)0.980:3.1544e-05)0.750:4.617e-06,(6736_6_16:5.1565e-05,(6840_3_1:2.7184e-05,(6899_7_3:3.485e-06,6823_7_19:3.552e-06)0.984:2.1129e-05)0.947:1.5781e-05)0.917:1.167e-05)1.000:3e-08)0.418:4.261e-06)0.919:2.1716e-05,((6805_4_15:2.5605e-05,6840_1_16:2.1483e-05)1.000:0.00086731,(6753_3_3:2.4147e-05,6823_3_3:3.8365e-05)1.000:0.000674207)1.000:0.000328762)0.864:1.5402e-05):0.00013287,((((6680_6_13:0.003138453,((6775_1_3:6e-09,(6630_3_3:1.3859e-05,6649_7_12:3.217e-06)0.122:1.5e-08)0.734:2.66e-07,(6673_8_20:1.7367e-05,6641_6_19:1.0629e-05)0.316:6e-09)1.000:0.002416745)0.999:0.000171444,((6259_8_16:6.106e-05,(6753_3_4:4.469e-06,(6805_2_7:1.4071e-05,6807_3_19:6.2269e-05)0.234:7.632e-06)0.988:5.7928e-05)0.993:4.1258e-05,(6731_4_5:3.444e-06,(6680_7_18:3.446e-06,6730_5_18:6.894e-06)0.000:6e-09)0.997:4.1432e-05)1.000:0.001198675)1.000:0.000155239,((6736_6_14:0.00451366,6755_6_21:0.00083741)1.000:0.000681494,((6731_5_15:1.3766e-05,6755_4_23:1.0529e-05)1.000:0.003954194,(6680_4_1:1.3065e-05,6680_4_24:5.2293e-05)1.000:0.002628186)1.000:0.000319723)0.858:6e-09)0.922:2.6721e-05,((((((7038_5_23:1.7387e-05,7004_7_66:1.9076e-05)0.750:3.8e-06,7054_4_18:1.0417e-05)0.725:3.873e-06,7011_6_22:2.3071e-05)0.989:3.6051e-05,(6730_4_4:8.551e-06,6755_2_11:5.968e-06)0.913:4.8244e-05)0.995:0.000134976,(((((6949_2_16:1.679e-05,6983_2_10:1.0566e-05)0.730:4.85e-06,((6983_5_15:6e-09,(6823_3_18:4.824e-06,6823_6_12:9.026e-06)0.956:2.0794e-05)0.673:7.803e-06,6972_4_23:1.1518e-05)0.732:3.881e-06)0.976:2.5269e-05,(6840_1_3:1.6921e-05,(6710_7_1:5.725e-06,6805_4_13:5.829e-06)0.661:5.116e-06)0.896:1.2666e-05)0.989:3.5547e-05,((6753_3_6:3.628e-06,((7004_5_18:7.006e-06,((7011_5_12:5.25e-06,7092_6_15:6e-09)0.867:5.286e-06,7038_4_4:3.508e-06)0.620:6e-09)0.889:7.176e-06,((6938_6_16:1.3008e-05,6949_4_24:1.8728e-05)0.434:6.837e-06,((7004_5_11:3.917e-06,7054_6_9:5.137e-06)0.768:5.976e-06,((6983_4_77:7.035e-06,6983_8_77:6e-09)0.801:3.503e-06,(6972_3_19:7.015e-06,((7011_4_22:1.7825e-05,7011_4_17:3.509e-06)0.758:5.913e-06,7004_5_21:1.6923e-05)0.805:1.6297e-05)0.000:6e-09)0.757:5.812e-06)0.875:1.2674e-05)0.858:1.0539e-05)0.937:1.6045e-05)0.993:3.9675e-05,(6680_8_2:2.3028e-05,(((6731_3_7:1.0449e-05,((6871_1_16:4.228e-06,6823_3_11:1.3476e-05)0.482:7.135e-06,(7004_5_1:1.4197e-05,(6823_3_14:1.1411e-05,((6730_8_23:3.485e-06,6730_4_24:6.88e-06)0.808:3.481e-06,((6731_3_14:7.139e-06,(6736_5_1:7.061e-06,(6731_5_21:1.0999e-05,6736_7_13:1.079e-05)1.000:0.000109999)0.679:2.4009e-05)0.367:1.1e-08,6775_1_22:1.0512e-05)0.609:8e-09)0.983:9.7548e-05)0.978:8.0348e-05)0.916:3.2904e-05)0.913:3.5457e-05)0.790:1.0499e-05,(6680_6_17:1.3908e-05,((6731_2_14:2.3715e-05,(((6730_7_18:7.969e-06,(6731_1_1:5.0831e-05,(6730_5_17:3.503e-06,6731_3_24:6e-09)1.000:7.4118e-05)0.924:5.9891e-05)0.743:1.4258e-05,(6775_2_13:3.58e-06,6680_7_9:3.478e-06)0.939:1.0719e-05)0.984:0.000109543,(((6731_2_7:1.0445e-05,6730_4_22:5.619e-06)0.948:2.3589e-05,((6710_7_20:3.1984e-05,6736_7_24:6e-09)1.000:0.000125554,(6731_5_9:8.0231e-05,((6731_3_6:0.002278505,(6983_6_34:6e-09,(6949_3_11:2.1259e-05,7004_6_39:1.7542e-05)0.956:1.811e-05)0.996:0.000251858)0.869:6.09e-05,((6823_5_21:7.019e-06,(6871_1_3:9.144e-06,6823_2_23:1.8886e-05)0.753:5.408e-06)1.000:7.4187e-05,(6755_3_9:3.3348e-05,7038_6_1:4.905e-05)0.963:1.9605e-05)0.988:4.0805e-05)0.866:2.1872e-05)0.972:0.000181666)0.861:0.000171791)0.557:0.000204772,((6755_4_8:5.3183e-05,(6631_6_4:7.5349e-05,(6680_4_5:1.0239e-05,(((6983_3_63:1.7096e-05,6823_5_4:1.5158e-05)0.970:4.1126e-05,6807_2_14:5.265e-06)0.841:1.3421e-05,6805_5_7:8.6638e-05)1.000:0.000136112)1.000:7.815e-05)0.979:7.3837e-05)0.945:4.2168e-05,6680_4_21:1.4232e-05)0.817:4.3812e-05)0.967:9.9576e-05)0.951:6.1462e-05)0.289:1.1e-08,6753_2_17:6.959e-06)0.902:0.000169982)0.957:1.5e-08)0.875:1.5698e-05,6755_4_4:1.3909e-05)0.960:3.1385e-05)0.941:3.1943e-05)0.811:2.5944e-05)0.000:8e-09,(6710_8_11:7.845e-06,6871_1_8:1.8331e-05)1.000:0.001160085)0.990:0.000166483)0.901:0.000124502,6823_3_22:0.00667941)0.000:1.1e-08)0.952:6.5945e-05)0.090:5.0952e-05,(((6949_1_2:2.437e-05,6983_7_66:1.0512e-05)1.000:0.000683119,(6710_7_4:0.000304711,6840_3_24:0.000866512)1.000:0.000109745)1.000:7.6958e-05,6899_7_4:0.004330723)0.403:3.673e-06)0.094:0.002259123,(((6630_3_6:0.001920642,(6871_2_15:2.1708e-05,6823_2_19:1.065e-05)1.000:0.001369296)1.000:0.003782442,((((7054_5_15:0.000183134,(6736_7_22:2.4762e-05,(6805_7_7:1.822e-05,6871_2_13:3.2014e-05)0.935:1.4316e-05)0.983:2.7849e-05)0.994:0.000118587,(6983_4_83:3.3234e-05,(((7068_4_2:4.4799e-05,(6925_3_4:3.749e-06,6949_2_13:7.99e-06)0.729:4.306e-06)0.760:7.373e-06,(6840_1_22:1.051e-05,(6753_2_4:4.639e-06,6805_5_16:1.0822e-05)0.935:2.1734e-05)0.929:2.1454e-05)0.910:3.7632e-05,(6899_5_24:1.481e-05,6925_3_6:7.022e-06)1.000:0.000517354)1.000:0.001868355)0.515:3.251e-06)0.538:0.000158183,((6840_1_2:3.205e-05,(6731_2_10:6.978e-06,6775_1_23:5.264e-06)0.905:1.4595e-05)0.703:7.626e-06,(((7038_4_7:2.2065e-05,(6805_3_13:6e-09,6830_3_22:0.000133557)0.950:2.8793e-05)0.883:7.926e-06,(7004_7_50:4.024e-06,(7054_4_2:6.47e-06,7038_4_20:7.031e-06)0.428:6e-09)1.000:0.002092375)0.941:1.7819e-05,6714_8_24:2.5096e-05)0.946:0.000110587)0.803:3.3421e-05)1.000:0.001654358,(((6925_3_23:1.4454e-05,6823_7_8:6.473e-06)1.000:0.007450358,((6731_4_4:1.3637e-05,(((((6925_7_11:1.0429e-05,6938_8_21:6e-09)0.432:6e-09,6925_3_9:3.495e-06)0.817:3.472e-06,(7004_8_81:3.481e-06,(6983_7_50:1.0497e-05,(7092_6_24:1.0422e-05,7068_4_5:6.962e-06)0.893:6.932e-06)0.764:3.466e-06)0.754:3.463e-06)0.778:6.935e-06,(6972_5_6:6e-09,7011_6_20:1.0524e-05)0.380:6e-09)0.784:7.106e-06,6805_4_5:1.7312e-05)0.958:1.6206e-05)0.931:1.8173e-05,(6593_5_11:2.0377e-05,6631_6_14:1.8334e-05)0.985:4.8977e-05)1.000:0.001046272)1.000:0.008676589,(((((6731_4_8:6e-09,6807_1_1:1.4154e-05)0.830:1.0394e-05,((6823_2_18:7.036e-06,((6972_4_20:4.955e-06,6938_7_7:7.034e-06)0.858:4.918e-06,(6949_4_22:3.3485e-05,(6925_4_16:1.6004e-05,6983_2_6:2.858e-06)0.306:6.396e-06)0.991:0.000107301)0.000:6e-09)0.760:1.372e-05,6840_3_10:1.4053e-05)0.972:6.8732e-05)0.956:5.1113e-05,((6680_5_13:6.972e-06,(6823_6_24:5.3724e-05,(6731_1_23:4.285e-06,6731_6_19:3.492e-06)0.967:1.6911e-05)0.245:6e-09)0.766:1.0475e-05,6753_2_8:3.483e-06)0.981:7.2338e-05)1.000:0.003594929,(6680_6_8:7.225e-06,6736_7_12:3.469e-06)1.000:0.000328155)1.000:0.000831738,(6972_2_20:1.3153e-05,(((7011_4_1:6e-09,(7011_4_23:2.7304e-05,7011_4_5:6e-09)0.458:3.938e-06)0.770:3.489e-06,(6972_2_16:1.2273e-05,6972_3_16:8.491e-06)0.893:1.0398e-05)0.796:3.535e-06,7011_5_24:2.5018e-05)0.537:8.95e-07)1.000:0.000221536)0.854:4.4607e-05)1.000:0.000810654)1.000:0.00109868)1.000:0.000441989,((7011_3_24:1.4299e-05,6823_7_10:7.077e-06)1.000:0.004140731,(6714_7_9:0.000988785,(6680_5_24:1.315e-05,6649_7_9:4.538e-06)1.000:0.003140581)0.228:0.000198141)1.000:0.000648665)1.000:0.002416154)1.000:0.001862645,6736_7_6:0.000893001)1.000:0.005979687,6871_2_10:0.000642119)1.000:0.031413603,(6730_1_11:0.059078133,((6807_1_12:0.008249129,6823_6_3:0.004290905)1.000:0.005923046,(6755_1_6:0.007081373,(6680_6_18:1.0105e-05,6731_3_1:3.32e-06)1.000:0.008144039)1.000:0.004486436)1.000:0.008522923)1.000:0.016171864)1.000:0.013454207,(((6259_6_19:4.5243e-05,(6755_2_14:1.0343e-05,6805_2_3:1.4198e-05)0.943:3.161e-05)1.000:0.020029996,(6807_2_8:0.019815447,(((6731_3_8:3.855e-06,(((6731_3_17:6e-09,6736_5_12:5.282e-06)0.782:5.378e-06,6736_8_4:1.0619e-05)0.612:4.307e-06,6823_6_21:4.8031e-05)0.764:6.46e-06)1.000:0.000441475,(((6805_3_21:2.0916e-05,6710_7_7:6e-09)0.859:7.175e-06,(6714_7_5:1.627e-05,(6753_3_15:1.1531e-05,((6730_7_24:2.0301e-05,6736_5_15:3.857e-06)0.189:3.531e-06,6730_5_22:3.781e-06)0.813:5.759e-06)0.064:3.65e-06)0.786:4.892e-06)1.000:0.000206876,(6731_3_20:1.0267e-05,(6649_8_20:1.3968e-05,(6630_2_3:7.063e-06,6631_1_13:3.476e-06)0.765:3.597e-06)0.745:3.816e-06)1.000:0.000310845)1.000:0.000143301)1.000:0.008597862,((6730_6_18:4.5925e-05,(6938_5_18:2.4725e-05,7068_4_24:7.179e-06)1.000:0.000111175)1.000:0.004960354,(6949_1_10:0.000287327,(6805_2_24:0.000176246,((6736_8_3:1.0469e-05,(6736_4_23:4.104e-06,(((6731_3_2:3.422e-06,6730_8_3:3.369e-06)0.968:1.3656e-05,(6805_7_3:1.0255e-05,(6925_8_12:1.4513e-05,6938_8_12:8.509e-06)0.985:3.4262e-05)0.855:8.02e-06)0.749:4.08e-06,6805_7_15:3.1027e-05)0.978:2.5538e-05)0.356:1.526e-05)0.844:1.4533e-05,(6753_4_13:0.000205426,(((7038_6_20:2.362e-05,7011_4_6:7.33e-06)0.871:8.605e-06,6949_4_7:9.49e-06)0.899:1.156e-05,6823_2_15:1.0493e-05)0.882:1.1606e-05)0.610:1.3334e-05)1.000:0.000157282)1.000:0.003777007)0.996:0.000760215)1.000:0.020297982)0.973:0.004337121)1.000:0.008756149)1.000:0.01816591,((((6631_3_9:0.026763353,(((((6805_2_20:0.000234491,(((6805_3_5:1.1753e-05,6841_7_24:1.7674e-05)0.785:6.855e-06,(((7092_6_23:1.0426e-05,(7068_4_3:1.9084e-05,7054_6_5:6e-09)0.879:7.626e-06)0.765:4.303e-06,7054_4_10:1.3477e-05)0.877:7.63e-06,7068_4_6:1.043e-05)0.745:4.933e-06)1.000:0.0002683,6823_5_14:7.8792e-05)0.566:2.4071e-05)0.999:0.000140408,(6899_6_4:1.4135e-05,(6938_5_12:2.9966e-05,6899_5_10:1.754e-05)0.699:4.861e-06)1.000:7.1584e-05)1.000:0.003615338,(((6925_3_18:3.5486e-05,(((((6664_1_7:1.5401e-05,6631_4_3:4.08e-06)0.673:8.045e-06,6730_4_14:1.1005e-05)0.383:7.987e-06,(6631_4_14:1.3614e-05,6673_8_16:1.0353e-05)0.000:2.527e-06)0.768:5.607e-06,(6593_5_15:2.2018e-05,(6259_8_5:5.2928e-05,6631_1_12:1.2785e-05)0.742:5.665e-06)0.440:4.502e-06)0.971:3.5324e-05,6871_2_2:4.8614e-05)0.742:5.943e-06)1.000:0.000183632,(((((7004_6_38:1.056e-05,((6938_5_15:1.8381e-05,6823_3_7:1.3488e-05)0.382:9.172e-06,7004_8_86:8.566e-06)0.932:1.6163e-05)0.897:1.1374e-05,(6925_8_15:8.948e-06,(7011_5_21:1.3808e-05,7011_5_20:1.2392e-05)0.907:1.2636e-05)0.906:1.2903e-05)0.583:6e-09,6871_1_14:6.965e-06)0.952:1.711e-05,(6630_2_7:4.035e-06,(6736_4_1:1.7883e-05,6755_3_24:2.2869e-05)0.775:1.5002e-05)0.834:1.3769e-05)0.999:6.1984e-05,((((6631_6_13:3.902e-06,(6805_2_10:1.3858e-05,6805_3_19:2.7137e-05)0.739:4.568e-06)0.978:4.6249e-05,(((6840_1_11:7.824e-06,6823_3_19:2.2438e-05)0.925:1.4779e-05,6823_4_21:9.648e-06)0.862:1.4339e-05,6983_7_59:1.9379e-05)0.986:3.8044e-05)1.000:0.000104165,(6805_4_6:1.0713e-05,6805_2_12:3.0596e-05)1.000:0.000112519)0.653:4.0673e-05,((6805_6_16:5.4772e-05,((6805_4_18:1.1754e-05,6807_1_18:4.6573e-05)0.963:5.4251e-05,6925_3_24:3.0799e-05)0.430:1.7583e-05)1.000:0.000225036,(6925_8_7:1.0298e-05,6938_8_14:3.0299e-05)1.000:0.000116714)0.475:2.0539e-05)1.000:0.000125332)0.998:7.6333e-05)0.928:2.57e-05,((((6805_6_23:4.15e-06,((6753_1_10:1.0713e-05,6736_8_2:1.6764e-05)0.503:1.82e-05,6755_6_3:5.48e-06)0.871:1.9209e-05)0.237:1.9259e-05,6841_7_18:1.1338e-05)0.912:2.4855e-05,6899_5_1:2.6755e-05)0.992:7.8253e-05,(6730_8_9:1.4017e-05,(6775_1_12:3.666e-06,(6730_8_20:3.508e-06,6755_2_2:7.03e-06)0.795:6.924e-06)0.867:6e-09)1.000:0.000227238)1.000:0.00016612)1.000:0.004954561)1.000:0.001349191,(6631_1_2:0.016766863,(6983_2_22:0.00162871,(6899_4_24:1.4202e-05,6938_8_6:4.129e-06)1.000:0.000520844)1.000:0.014483349)1.000:0.001709528)0.996:0.001481152,(6983_7_67:0.027493835,((((((6823_1_8:5.2915e-05,(6775_2_5:1.559e-05,(6753_3_10:2.2747e-05,6714_8_17:8.946e-06)0.354:8.318e-06)0.993:4.0534e-05)0.846:7.457e-06,(6925_6_8:7.269e-06,6983_2_13:1.4259e-05)0.995:3.5894e-05)1.000:0.000128068,(6823_7_24:0.002440897,((6805_3_12:0.001439462,(6899_5_19:1.2636e-05,6949_2_23:1.7533e-05)0.852:8.208e-06)1.000:0.000976055,(6755_4_18:0.00440137,(6899_4_20:1.7258e-05,(6949_1_1:1.486e-05,6949_2_3:2.1476e-05)0.367:7.622e-06)0.998:5.017e-05)0.862:7.375e-06)1.000:0.000332588)1.000:0.000762692)1.000:0.013761836,((6710_7_9:0.008526416,(6823_4_16:0.004825335,(6899_5_18:1.4231e-05,(6983_5_4:0.003244014,7038_8_31:6.799e-06)0.731:7.745e-06)1.000:0.026115892)1.000:0.000979821)1.000:0.002485058,((6925_8_16:0.002809823,(((6753_4_19:7.468e-06,6983_5_16:2.8237e-05)1.000:0.010857337,((7054_4_8:7.127e-06,6972_5_14:1.4154e-05)1.000:0.002574048,(6631_4_2:1.76e-05,6730_4_5:6e-09)0.846:1.8299e-05)1.000:0.001780261)1.000:0.00071372,((((7038_7_13:1.3336e-05,7054_5_12:3.582e-06)0.177:4.525e-06,(7054_5_16:7.152e-06,6972_2_4:1.4291e-05)0.769:3.53e-06)1.000:0.004011616,((6823_5_9:7.453e-06,(7004_7_53:1.264e-05,7038_4_15:3.574e-06)0.404:8.547e-06)1.000:0.001835887,(7011_5_18:0.001521887,(((6753_4_12:3.7908e-05,7068_4_18:8.71e-06)1.000:0.000253226,(6938_7_21:8.563e-06,(7011_4_14:0.00079188,6823_7_14:0.000257078)1.000:0.00023691)1.000:0.004084337)1.000:0.001885886,(6938_7_11:7.423e-06,(7011_6_2:1.6998e-05,(7038_4_19:1.6746e-05,7004_7_49:1.4305e-05)0.426:1.0139e-05)0.433:6e-09)1.000:0.004061835)1.000:0.000762552)0.973:0.000154852)1.000:0.001411509)1.000:0.000452009,(((((6972_3_8:1.7677e-05,6983_2_11:3.537e-06)0.760:3.098e-06,6983_3_66:1.1041e-05)0.450:7.089e-06,6972_2_15:1.8011e-05)0.999:5.5246e-05,((6775_2_10:1.4092e-05,((6983_2_19:4.2682e-05,6983_6_32:1.6986e-05)0.893:1.142e-05,6840_3_20:4.1327e-05)0.133:6e-09)0.933:1.8516e-05,(6630_3_17:7.129e-06,6680_7_6:1.1328e-05)0.995:4.0899e-05)0.957:2.0195e-05)1.000:0.001170764,((((6753_2_19:1.9563e-05,6925_6_15:1.2454e-05)0.993:0.000128577,(7004_6_48:7.242e-06,7038_6_22:1.7843e-05)1.000:6.2052e-05)0.995:0.000137359,(6949_4_9:3.3885e-05,6899_4_7:2.5532e-05)0.992:4.2412e-05)1.000:0.000823486,(6630_4_5:1.0627e-05,6730_6_3:3.9511e-05)1.000:0.000409348)1.000:0.000127454)1.000:0.001907711)1.000:0.000626506)1.000:0.00063797)1.000:0.000610053,(6753_1_1:0.003887875,((6925_8_24:0.000160695,6949_3_16:0.0048789)1.000:0.009039159,((7038_4_3:1.1377e-05,7038_7_18:1.023e-05)1.000:0.007718858,6899_5_21:0.015048562)0.678:0.000394709)1.000:0.000683798)1.000:0.000309814)1.000:0.001064117)1.000:0.002665369)0.996:0.000503218,(7004_8_76:1.0566e-05,(7038_6_5:8.447e-06,7068_4_10:8.157e-06)0.767:5.219e-06)1.000:0.006073629)0.995:0.000926688,((6755_4_2:9.081e-06,6755_6_1:9.0253e-05)1.000:0.015196195,(6710_7_13:1.579e-05,6925_4_5:2.0811e-05)1.000:0.003337375)1.000:0.006618652)1.000:0.005775608)0.759:0.001916565)1.000:0.005548535)1.000:0.010174803,((((6641_6_8:2.1085e-05,6673_8_8:6e-09)0.452:3.49e-06,(6631_3_12:7.009e-06,6730_7_16:1.1964e-05)0.000:6e-09)0.862:1.1e-08,(6631_1_24:1.7732e-05,6631_7_6:1.0518e-05)0.000:8.844e-06)1.000:0.026528276,(6664_1_14:0.065097905,((6680_4_11:1.4897e-05,6680_5_12:1.3743e-05)1.000:0.016322954,(6710_8_5:0.016508952,(6259_8_9:1.624e-05,(6641_6_17:1.156e-05,(6631_2_11:0.001416273,6259_6_12:8.2368e-05)0.749:2.282e-06)0.767:3.808e-06)1.000:0.006853214)1.000:0.008995619)1.000:0.012663599)1.000:0.004395965)0.994:0.003056257)1.000:0.017275591,(6631_2_16:0.031237861,((6823_3_20:2.9006e-05,6823_6_17:4.445e-06)1.000:0.023172688,(6680_8_5:3.33e-06,(6593_4_14:6.771e-06,6680_4_8:1.6939e-05)0.200:6.861e-06)1.000:0.024125665)1.000:0.009055623)1.000:0.005672454)1.000:0.004521036,(6753_3_13:0.029057999,6805_2_5:0.023488201)1.000:0.011910415)0.489:0.003473174)1.000:0.006979594)1.000:0.003233593,((((((7038_7_5:2.5324e-05,(((((6823_5_1:1.0652e-05,(((6805_3_14:1.513e-05,6753_1_14:2.4306e-05)0.897:6e-09,(((6753_3_23:1.5539e-05,6755_4_9:1.661e-05)0.765:7.221e-06,6736_7_8:2.139e-05)0.745:7.039e-06,(((6938_5_11:0.000165055,((6949_4_19:3.3679e-05,(6805_5_23:1.2433e-05,(6871_1_6:2.5262e-05,(6983_8_93:7.207e-06,6972_3_9:1.115e-05)0.921:1.1313e-05)0.909:1.992e-05)0.325:1.1762e-05)0.870:1.2654e-05,(6938_8_18:1.5627e-05,7011_6_18:4.9516e-05)0.977:2.1114e-05)1.000:0.000156484)0.996:6.1687e-05,((((6731_6_23:2.4696e-05,(6680_5_14:1.0578e-05,6736_4_7:1.1e-05)0.752:3.66e-06)0.755:3.65e-06,(6805_2_19:1.2984e-05,(6949_3_9:1.9216e-05,7004_5_2:1.7151e-05)0.964:2.1608e-05)0.755:6.419e-06)1.000:6.0885e-05,((((6730_5_1:2.4675e-05,(6731_6_8:3.524e-06,6731_5_5:1.0606e-05)0.954:1.4106e-05)0.885:6e-09,(6631_4_18:7.065e-06,6630_3_5:3.539e-06)0.813:3.527e-06)0.976:1.7615e-05,((6805_7_13:1.7706e-05,(6823_6_20:5.1252e-05,6753_4_3:3.682e-06)0.836:1.0301e-05)0.987:3.3051e-05,(6736_8_13:6e-09,(6710_8_8:1.3035e-05,6753_2_1:2.466e-05)0.368:6e-09)0.925:1.2977e-05)0.903:6e-09)0.990:2.9647e-05,6714_7_8:0.000226124)0.436:8e-09)0.407:4.7379e-05,(((6593_4_24:7.174e-06,(6259_7_10:5.074e-05,6680_8_19:1.0578e-05)0.889:1.0736e-05)1.000:0.001225152,(7068_4_14:5.4863e-05,6630_4_22:2.8318e-05)0.475:6e-09)0.911:1.1045e-05,(6593_5_7:8.6811e-05,6755_4_15:2.4688e-05)0.907:5.0799e-05)0.981:7.2531e-05)1.000:0.001233233)1.000:0.000132051,(((((6840_3_22:2.0429e-05,6823_5_13:1.3548e-05)0.864:1.5702e-05,(6983_4_87:1.0533e-05,((6871_1_22:3.551e-06,(6983_5_8:1.4189e-05,6983_8_96:8.419e-06)0.795:4.196e-06)0.871:9.928e-06,6938_5_9:4.1813e-05)0.710:1.4669e-05)0.000:1.2303e-05)0.645:3.976e-06,6830_3_4:1.4188e-05)0.960:2.9869e-05,6736_4_12:2.471e-05)0.924:2.2062e-05,((6805_3_2:1.0596e-05,6731_6_5:6e-09)0.336:7.048e-06,6871_2_3:2.1284e-05)0.982:1.7506e-05)0.000:6e-09)0.893:1.0436e-05)0.948:1.5534e-05)0.905:7.552e-06,6972_3_3:1.5257e-05)0.273:8.689e-06)0.299:1.5e-08,6938_6_8:1.0612e-05)0.945:1.3163e-05,6983_4_92:1.4268e-05)0.745:4.859e-06,(6925_5_21:8e-09,(7004_6_34:2.4912e-05,7004_5_5:7.123e-06)0.575:7.095e-06)0.868:1.052e-05)0.879:1.4232e-05,((6972_5_18:4.91e-06,6972_4_16:3.547e-06)0.986:3.3673e-05,((6949_4_16:1.2693e-05,6949_4_4:1.8447e-05)0.965:2.3157e-05,(7054_5_13:7.107e-06,((7004_7_60:6.617e-06,7038_5_19:8.414e-06)0.161:1.165e-06,6925_8_14:1.2485e-05)0.777:1.2374e-05)0.916:6e-09)0.919:1.4138e-05)0.886:7.808e-06)0.747:4.044e-06)1.000:0.002424399,((6983_3_58:0.001353999,(6949_1_3:0.000174396,((6938_3_32:0.000187576,(((6925_3_20:7.454e-06,(6899_5_20:1.889e-05,6823_7_7:2.8499e-05)0.905:1.2848e-05)0.824:1.1576e-05,(6925_3_17:3.5355e-05,6949_2_8:1.4008e-05)0.885:2.1581e-05)1.000:0.000111127,6730_3_17:0.001851712)1.000:0.000202597)0.886:0.000150821,(6753_2_10:1.8162e-05,6807_3_16:1.0726e-05)1.000:0.000212073)0.836:6.4238e-05)1.000:0.003546922)1.000:0.0001855,(6753_4_2:1.5366e-05,6871_2_1:2.5599e-05)1.000:0.000307573)1.000:0.001681495)1.000:0.033481059,(6680_5_16:1.9221e-05,6823_3_4:2.1848e-05)1.000:0.03038579)1.000:0.006721434,(((6730_7_12:1.9062e-05,6730_8_10:1.9019e-05)1.000:0.000164506,(6841_7_19:1.5433e-05,6823_1_21:2.2758e-05)1.000:0.000163127)1.000:0.030623608,6259_7_15:0.034853727)1.000:0.005475263)1.000:0.005358601,((6983_8_94:0.030907471,(((7038_5_6:1.653e-05,(6938_5_13:6e-09,(7038_5_10:1.6605e-05,7011_3_4:9.896e-06)0.289:6e-09)0.928:9.442e-06)0.165:6e-09,(6972_2_5:7.135e-06,6925_8_8:1.3197e-05)0.825:3.417e-06)1.000:0.011830971,((((7038_5_18:9.7509e-05,((6949_1_8:5.0524e-05,(6899_4_18:2.4177e-05,6899_5_6:1.7126e-05)0.714:4.964e-06)0.352:1.2487e-05,(((6899_5_22:9.092e-06,6925_5_16:6.831e-06)0.970:2.3416e-05,6823_2_22:1.8951e-05)0.865:1.9823e-05,6841_7_17:3.7014e-05)0.745:7.651e-06)0.324:1.9973e-05)0.916:3.4038e-05,(6731_3_21:7.033e-06,6755_5_12:3.6403e-05)0.756:1.2856e-05)0.887:7.746e-06,6631_3_21:3.3962e-05)1.000:0.005032841,(6736_7_23:0.003979906,((6631_4_13:1.6151e-05,(6649_7_20:1.0733e-05,6730_4_20:1.071e-05)0.397:5.094e-06)1.000:0.001047141,((6730_7_1:8.924e-06,6753_1_16:1.6206e-05)1.000:0.000530996,(((6925_8_17:6e-09,6949_1_19:1.0485e-05)1.000:0.00247937,(6755_3_3:0.00066115,(6755_6_4:6.1591e-05,((((6775_2_7:2.403e-05,6983_6_48:0.003086318)0.972:2.0724e-05,((6631_7_15:7.294e-06,6755_2_19:9.783e-06)0.982:2.3882e-05,(6593_4_1:6.341e-06,6649_8_13:3.879e-06)0.993:2.3812e-05)0.998:3.4203e-05)0.563:6e-09,6805_7_12:0.001169435)0.874:2.185e-05,6753_3_9:0.000144027)0.178:6.226e-06)1.000:0.000386771)1.000:0.000291889)0.818:0.000148596,(6972_5_17:8.132e-06,(6938_7_13:4.654e-06,7038_4_9:2.4189e-05)0.518:7.939e-06)1.000:0.003938222)0.984:4.1158e-05)0.650:0.000100505)1.000:0.00089492)1.000:0.00685079)1.000:0.008750681)1.000:0.024833485)1.000:0.006539531,(((6983_6_25:0.000104254,(6710_6_3:6.981e-06,6805_2_14:4.282e-06)0.995:4.8477e-05)1.000:0.001886087,(6649_7_3:0.000104296,(6710_8_3:1.0288e-05,6805_2_9:7.174e-06)1.000:0.00220264)0.994:0.001075322)1.000:0.029355151,((6731_2_3:0.00029272,((6755_5_6:2.8482e-05,((6972_2_3:3.7708e-05,6983_2_5:3.7736e-05)0.934:2.2669e-05,6736_4_9:1.6453e-05)0.103:6.619e-06)0.759:8.019e-06,6593_4_11:9.918e-06)1.000:0.000154439)1.000:0.004859838,(6753_2_21:0.007489334,(6649_7_13:1.1089e-05,((6680_4_17:1.0025e-05,(6755_2_21:6e-09,6775_1_6:1.0558e-05)0.885:7.563e-06)0.694:7.026e-06,6805_4_21:1.7143e-05)0.000:6e-09)1.000:0.000665862)0.924:0.003054978)1.000:0.02695707)1.000:0.008320767)0.631:0.002361182)1.000:0.004315517,((((6714_7_20:1.5821e-05,7054_6_3:4.0271e-05)1.000:0.037919254,(7038_5_11:0.00285434,((6630_2_11:2.197e-05,(6630_1_18:6.755e-06,6631_5_7:1.6654e-05)0.690:2.365e-06)1.000:0.000812673,(6983_8_84:1.2997e-05,6972_5_7:2.328e-05)1.000:0.00028715)1.000:0.001975282)1.000:0.032973104)1.000:0.00766622,((6630_2_1:0.001236756,((7038_7_17:1.4282e-05,7054_6_11:3.519e-06)1.000:0.001335832,(((6680_5_20:1.7308e-05,6949_2_11:2.1728e-05)0.856:2.1168e-05,((7011_3_15:2.8913e-05,6736_8_6:4.517e-06)0.997:7.0272e-05,(((6730_8_24:1.7361e-05,6730_8_7:4.18e-06)0.968:2.0823e-05,(6899_6_13:1.8801e-05,6899_7_1:1.7536e-05)0.988:2.7118e-05)0.972:1.9788e-05,(6731_5_11:1.4678e-05,6731_5_2:1.0461e-05)0.950:1.4733e-05)0.995:4.5427e-05)1.000:0.000192144)0.990:0.000114374,(6983_7_61:2.9421e-05,6841_7_22:8.843e-05)1.000:0.000170769)0.434:2.878e-05)1.000:0.001152035)1.000:0.036685036,(6730_5_14:0.000632197,((6805_7_21:6.411e-05,6805_7_4:5.4507e-05)1.000:0.001361279,(6730_4_6:1.95e-05,6259_7_9:4.8973e-05)1.000:0.000256907)0.479:0.000341097)1.000:0.031466506)1.000:0.005512181)0.966:0.002780715,(((6823_1_23:0.006379225,((6730_6_14:5.239e-05,((6949_3_13:1.5498e-05,(7038_6_16:1.275e-05,6925_8_13:1.1781e-05)0.716:4.981e-06)0.864:8.71e-06,6823_1_11:6e-09)0.990:4.661e-05)1.000:0.000945032,(6938_8_16:0.002920122,(6593_5_22:3.424e-06,(6680_6_23:1.0211e-05,6736_8_5:8.535e-06)0.889:8.576e-06)1.000:0.0074756)1.000:0.001748645)1.000:0.004433154)1.000:0.029108626,(((6823_5_22:3.591e-06,6972_2_6:0.00163718)1.000:0.003485601,(((7004_6_41:1.1802e-05,7011_3_21:1.9928e-05)1.000:0.000313037,((((7004_5_4:2.0273e-05,6972_2_17:8.436e-06)0.458:1.2074e-05,7004_5_3:2.0582e-05)0.256:4.54e-06,6840_3_15:2.3066e-05)1.000:0.000559882,((6807_3_6:1.9193e-05,6823_2_9:3.485e-06)1.000:0.000192966,((6649_8_8:6.677e-06,(6631_2_24:1.3302e-05,6630_1_6:1.3372e-05)0.427:3.332e-06)1.000:0.000838101,((6631_5_15:3.35e-06,6730_1_3:1.0094e-05)1.000:0.001083635,(6731_6_2:6.706e-06,(6631_5_5:6.709e-06,6714_8_15:1.3434e-05)0.766:3.364e-06)1.000:0.001599769)1.000:0.000476441)1.000:0.000438662)0.998:0.000219822)0.897:0.000240359)0.999:0.000180195,((7011_4_24:7.462e-06,7038_6_24:6.869e-06)0.990:3.9002e-05,6871_2_9:1.1674e-05)1.000:0.000239944)1.000:0.001056066)1.000:0.001793132,(((6925_7_16:1.6965e-05,7092_6_14:3.923e-05)1.000:0.000851872,(((((7038_6_13:7.342e-06,(6938_6_1:1.6937e-05,6972_2_11:1.1156e-05)0.770:5.655e-06)0.996:2.9505e-05,((7011_3_22:0.004169985,((7054_4_3:6.744e-06,7054_6_18:7.28e-06)0.972:1.8208e-05,(6938_3_33:6.658e-06,6938_3_30:1.5238e-05)0.909:1.4704e-05)0.638:6e-09)0.991:2.4989e-05,((6983_8_90:1.4286e-05,6983_4_81:2.3462e-05)0.881:7.938e-06,(6938_3_25:7.518e-06,6938_3_27:9.134e-06)0.785:5.303e-06)0.956:1.8818e-05)0.957:1.6356e-05)0.984:2.3044e-05,((6753_3_18:5.1981e-05,7038_8_47:4.5057e-05)0.413:6.656e-06,(6710_7_18:1.8774e-05,((7038_7_23:3.356e-06,(7038_6_18:6.73e-06,7054_4_7:1.1043e-05)0.781:5.495e-06)0.788:6e-09,((7092_6_21:0.00056709,7068_4_1:3.515e-06)0.761:3.563e-06,((7054_6_6:1.6345e-05,7054_4_4:2.4039e-05)0.910:1.852e-05,6938_3_35:3.8e-06)0.464:6e-09)0.888:9.546e-06)0.793:1.3285e-05)0.999:5.1171e-05)0.744:4.178e-06)0.941:2.7021e-05,((7004_8_84:1.0805e-05,(7038_5_24:1.07e-07,7038_6_10:1.0091e-05)0.320:1.114e-05)0.850:1.5456e-05,((7004_6_32:8.969e-06,6938_5_17:1.0044e-05)0.763:4.449e-06,((7054_6_7:1.6633e-05,(7068_4_12:1.7049e-05,7004_6_40:1.4155e-05)0.743:4.788e-06)0.289:6e-09,7011_4_9:3.408e-06)0.739:7.061e-06)0.750:5.421e-06)1.000:0.000164967)1.000:0.000569216,(6938_3_34:2.7924e-05,7038_6_4:3.2931e-05)1.000:0.001863016)1.000:0.003130721)0.972:0.000223092,((6736_8_21:2.0845e-05,6805_2_1:1.0593e-05)1.000:0.000104002,((6631_6_2:4.1162e-05,6630_4_24:0.000616216)0.000:6e-09,(((((6736_5_10:7.9485e-05,6259_8_22:2.7429e-05)0.878:3.9572e-05,((6664_1_12:2.0713e-05,6631_3_5:6.698e-06)0.790:3.457e-06,6631_2_19:0.000371998)0.779:3.452e-06)0.386:6.137e-06,(((6631_6_6:6e-09,(6630_2_17:6e-09,6680_8_13:1.0278e-05)1.000:0.000372673)0.841:4.504e-06,6630_4_18:1.3433e-05)0.000:6e-09,6714_7_14:6.697e-06)0.911:8.994e-06)0.510:1.1e-08,((6805_6_6:6.72e-06,6807_3_12:3.4667e-05)1.000:0.002289763,(((6807_1_21:4.455e-06,(6823_4_7:1.798e-05,6805_4_24:1.2999e-05)0.695:1.5985e-05)0.958:3.395e-05,(6753_3_12:2.3495e-05,6805_5_2:7.828e-06)0.756:3.928e-06)0.768:3.59e-06,(6736_8_1:6.741e-06,6753_1_22:6.676e-06)0.778:3.358e-06)1.000:0.00036076)0.907:1.9473e-05)1.000:0.000209041,((6631_6_1:0.000421115,6753_3_5:2.0066e-05)0.712:3.387e-06,(6631_5_10:1.6418e-05,(6710_8_7:5.079e-06,6631_5_22:1.7142e-05)0.417:6.896e-06)0.765:4.785e-06)0.000:6e-09)0.849:4.286e-06)1.000:9.0258e-05)1.000:0.002835608)1.000:0.001671344)1.000:0.039861068)1.000:0.005542934,((6593_4_5:0.01653682,((6731_5_16:1.2591e-05,(6983_7_65:1.7597e-05,7038_7_21:2.3819e-05)0.985:3.3572e-05)1.000:0.006925924,(6753_2_13:1.5838e-05,6755_1_8:1.4379e-05)1.000:0.010181882)1.000:0.007971202)1.000:0.023876601,((6736_4_5:0.001682237,(6805_2_21:1.0718e-05,(6631_4_24:2.0869e-05,6730_5_8:1.7423e-05)0.808:6.707e-06)1.000:0.001524576)1.000:0.02582351,(6649_7_6:0.016987878,((6259_6_15:0.000296118,6731_6_24:0.00060413)0.987:0.000125597,(6899_7_11:0.000825953,(6714_8_9:1.4277e-05,(6631_3_23:6.843e-06,(6730_4_3:3.504e-06,6730_7_23:6.999e-06)0.927:1.0922e-05)0.904:1.1485e-05)1.000:0.000181328)0.288:0.000112929)1.000:0.020087248)1.000:0.010179726)1.000:0.010296191)1.000:0.004478555)0.974:0.002626955)1.000:0.003940734)1.000:0.003439716)0.999:0.003131935)1.000:0.002388589,(((7011_5_13:0.029800328,(6823_4_5:0.040782861,((6593_4_2:0.003309145,(6630_1_5:2.4036e-05,(6714_8_13:6.741e-06,6730_5_11:1.0442e-05)0.874:1.0576e-05)1.000:0.000637846)1.000:0.002490523,((6925_3_3:4.8425e-05,(6631_2_6:2.1284e-05,6641_6_20:6.928e-06)0.973:2.7377e-05)1.000:0.001209981,((6871_1_9:3.497e-05,((6631_6_11:6.77e-06,(6630_2_24:6e-09,(6630_4_21:1.0225e-05,6673_8_7:1.6704e-05)0.384:1.1049e-05)0.826:5.524e-06)0.923:1.9226e-05,6593_4_13:1.3701e-05)0.891:1.1039e-05)0.954:1.686e-05,((6736_6_17:3.3623e-05,7038_8_25:3.0058e-05)0.975:2.28e-05,6807_1_7:4.9937e-05)0.749:4.312e-06)1.000:0.001836361)1.000:0.002889763)1.000:0.026177449)1.000:0.008252999)1.000:0.0073684,(6673_8_3:1.7596e-05,6841_7_11:2.4241e-05)1.000:0.034484569)1.000:0.005238897,((6730_5_3:0.018970473,((6805_3_16:0.001852688,((((((6983_2_4:2.9797e-05,6871_1_18:2.0016e-05)0.953:3.4432e-05,(6840_3_12:5.4747e-05,6823_6_4:5.1938e-05)0.869:1.0731e-05)0.209:1.1515e-05,(6631_1_20:2.3724e-05,7092_6_6:2.8161e-05)1.000:0.001235385)1.000:0.000355372,(6710_8_15:5.0472e-05,(((6593_4_22:5.22e-06,(6630_2_14:3.1446e-05,6259_7_6:6.2953e-05)0.694:1.2763e-05)0.604:3.684e-06,(6755_5_24:6.7e-06,(6972_3_21:9.691e-06,7011_5_15:1.0647e-05)0.968:3.277e-05)0.643:4.95e-06)0.988:6.4927e-05,6755_6_14:3.4882e-05)0.854:2.1668e-05)0.984:0.000137936)0.999:0.000317606,(6730_1_20:2.2155e-05,((6736_6_23:1.0419e-05,(((6753_4_20:6e-09,(6710_6_12:1.0416e-05,6753_4_21:8.211e-06)0.369:4.182e-06)0.905:8.645e-06,6805_4_14:1.1535e-05)0.757:6e-09,6736_6_15:3.407e-06)0.943:1.9063e-05)0.926:6e-09,6840_1_1:3.3871e-05)0.917:1.3653e-05)0.997:0.000136525)0.920:0.000159399,(6641_6_13:6e-09,(6664_1_23:1.1711e-05,6710_8_12:4.3872e-05)0.847:1.5328e-05)1.000:0.001942212)1.000:0.000610926)1.000:0.001916822,((6731_6_18:0.000224201,6736_4_3:0.000872099)1.000:0.005397432,((6641_6_5:1.7351e-05,6736_6_13:6.2834e-05)0.880:2.208e-05,(6673_8_15:2.0787e-05,(6630_4_3:3.461e-06,6631_5_8:1.3693e-05)0.963:6e-09)0.736:3.648e-06)1.000:0.00126312)1.000:0.003246709)1.000:0.014150588)1.000:0.025661013,(((6631_3_10:1.0028e-05,(6730_3_13:6.75e-06,6631_7_1:1.0026e-05)0.000:6e-09)1.000:0.004991105,(((((6925_6_2:6e-09,(6983_4_73:1.008e-05,6983_8_76:1.0115e-05)0.926:1.0055e-05)0.784:3.342e-06,6983_3_55:6.745e-06)0.906:1.0263e-05,((6925_4_22:8.586e-06,((6983_6_43:6.862e-06,6949_4_6:8.385e-06)0.893:8.573e-06,((7038_5_14:2.3549e-05,7038_5_8:8.069e-06)0.908:1.2058e-05,(7038_5_4:1.6931e-05,(6972_4_4:1.8911e-05,6972_4_3:6e-09)0.911:1.1308e-05)0.478:6e-09)0.868:1.3495e-05)0.871:8.417e-06)0.511:1.0407e-05,(6983_8_95:6.742e-06,(6949_2_22:7.567e-06,6983_7_63:7.134e-06)0.727:3.987e-06)0.899:1.0296e-05)0.545:1.0017e-05)1.000:0.000360972,((((6714_8_20:3.984e-06,(6755_5_20:6e-09,(6736_5_9:5.074e-06,(6805_7_6:2.3905e-05,6830_3_24:1.8613e-05)0.334:5.786e-06)0.410:7.057e-06)0.835:7.432e-06)0.973:5.2144e-05,(6805_5_1:1.336e-05,6983_3_53:3.1659e-05)0.950:2.6302e-05)0.417:4.1305e-05,6925_7_6:2.718e-05)0.894:8.9867e-05,7038_6_2:0.000308613)0.897:0.000151659)1.000:0.002767412,(6830_3_23:1.4724e-05,6823_3_24:4.2713e-05)1.000:0.000695725)1.000:0.001660382)0.983:0.001978793,(((((((7004_6_28:1.7021e-05,(6925_8_1:2.4469e-05,6972_5_5:6.771e-06)0.819:8.202e-06)0.980:1.8369e-05,6983_6_45:0.000224575)0.546:1.3299e-05,6925_4_11:4.097e-06)0.930:1.4677e-05,6840_1_9:2.2107e-05)1.000:0.000477992,(7011_4_8:6e-09,7011_5_23:2.3641e-05)1.000:0.000685611)0.999:0.000426423,6755_1_5:0.00070647)0.673:0.00019128,(6736_7_3:0.000178029,(7038_5_20:2.0783e-05,7054_4_13:1.7701e-05)1.000:0.000106205)1.000:0.000374654)1.000:0.001694314)1.000:0.034271074)1.000:0.006388967)0.860:0.00286182)1.000:0.001897584,((((((6631_5_17:6e-09,6730_6_4:6.993e-06)0.809:3.503e-06,(6730_1_8:6.987e-06,6630_4_6:3.512e-06)0.000:6e-09)1.000:0.037467029,((6649_8_6:1.4571e-05,6649_7_15:3.656e-06)1.000:0.000180799,(6631_2_15:0.000166848,6972_5_12:9.9191e-05)0.999:7.6097e-05)1.000:0.037631371)1.000:0.006558354,(6593_4_21:0.030581889,(6710_8_13:0.01366105,(6631_2_2:0.000119804,6731_4_3:0.000138551)1.000:0.013100538)1.000:0.017329141)1.000:0.007172502)1.000:0.004400283,((((6805_4_7:4.1389e-05,(6631_7_23:5.5702e-05,(6731_4_1:1.0167e-05,6259_6_3:6.0095e-05)0.997:3.9557e-05)0.713:7.354e-06)0.749:3.756e-06,6731_1_19:3.4355e-05)0.890:1.6511e-05,(6631_4_8:1.3061e-05,6649_7_16:1.0645e-05)0.994:4.4649e-05)1.000:0.03886797,((7054_5_23:6.237e-06,(7054_5_1:3.958e-06,7054_5_8:2.0241e-05)0.723:8.935e-06)1.000:0.037747074,((6805_3_17:2.0714e-05,((((6938_8_3:2.2221e-05,6938_8_1:1.1014e-05)0.770:6.212e-06,6938_7_20:1.0396e-05)0.801:1.6812e-05,(6938_8_11:1.0465e-05,((7004_7_72:1.6588e-05,6983_3_51:6.34e-06)0.719:4.132e-06,7011_6_24:4.655e-06)0.941:1.8895e-05)0.421:4.685e-06)0.332:4.648e-06,7011_3_5:1.6628e-05)0.836:1.0742e-05)1.000:0.006124791,((6972_4_6:1.3542e-05,((6753_1_13:1.0344e-05,(6731_4_13:6.883e-06,6805_2_6:1.7462e-05)1.000:0.000270726)0.377:3.511e-06,6805_5_4:1.0585e-05)0.791:7.145e-06)0.282:6e-09,(6823_5_23:3.473e-06,6972_4_9:9.295e-06)0.829:4.635e-06)1.000:0.005751266)1.000:0.023420055)1.000:0.007574048)1.000:0.004714148)1.000:0.004052168,((((((((6630_1_8:2.0813e-05,6649_8_5:1.0335e-05)0.775:3.543e-06,(6730_4_13:2.0533e-05,6714_8_2:3.514e-06)0.754:3.523e-06)1.000:0.000240275,((6755_1_7:1.3528e-05,6755_2_9:1.4434e-05)0.953:1.6619e-05,(6949_1_20:4.5969e-05,6983_6_31:5.3041e-05)0.923:1.7431e-05)1.000:0.000237534)1.000:0.001786377,(((6673_8_9:5.6788e-05,(7038_5_16:1.8238e-05,7038_7_1:7.035e-06)0.961:2.3218e-05)0.932:3.3808e-05,6259_8_3:9.8234e-05)1.000:0.001525287,(6631_4_21:3.5566e-05,(6731_6_14:3.5394e-05,((7092_6_2:4.2363e-05,((6823_2_24:1.073e-05,6823_5_18:8.229e-06)0.998:4.2397e-05,((6259_8_12:0.000349919,(7011_6_23:9.2382e-05,6731_4_14:0.000143501)0.986:0.000228325)1.000:0.000273494,((6949_1_6:0.000725547,(7038_4_17:1.2526e-05,6823_3_9:3.9407e-05)1.000:6.019e-05)0.744:3.812e-06,6983_5_7:0.000266424)0.407:1.0098e-05)0.889:3.8575e-05)0.987:0.000149043)0.731:2.2223e-05,((7038_8_38:5.0811e-05,6925_4_15:7.507e-05)0.943:1.5972e-05,(((6755_1_11:2.5522e-05,((6753_4_5:2.0677e-05,(6631_5_19:3.478e-06,6630_2_9:6e-09)0.760:3.991e-06)0.789:7.562e-06,6680_8_8:2.1078e-05)0.999:5.3981e-05)0.433:5.909e-06,6736_4_13:4.0986e-05)0.592:3.0203e-05,6830_3_10:3.6772e-05)0.993:6.9485e-05)0.999:0.000152741)0.924:8.1123e-05)0.719:2.336e-05)0.982:0.000202184)1.000:0.001886656)1.000:0.034832849,(((6710_6_22:1.3645e-05,6736_5_16:6.839e-06)0.735:6.863e-06,(6714_8_11:6.899e-06,6631_4_10:6.888e-06)0.767:3.526e-06)1.000:0.026197504,(((6755_2_18:0.002335734,(6630_4_8:0.001329246,6938_5_8:0.001282867)1.000:0.003986536)1.000:0.010255971,(((((7038_5_5:3.906e-06,(((7038_7_14:3.7487e-05,(6983_6_40:1.9988e-05,((6753_2_16:1.0111e-05,6949_3_6:4.1434e-05)0.949:2.2352e-05,((6631_1_17:1.342e-05,6673_8_12:3.878e-06)0.846:7.629e-06,6753_4_23:4.2714e-05)0.698:6e-09)0.936:1.7839e-05)1.000:0.000968876)0.888:1.9984e-05,7038_7_7:1.2679e-05)0.810:2.7979e-05,7038_5_3:1.9542e-05)0.215:9.635e-06)0.914:2.8817e-05,6972_2_19:1.2777e-05)1.000:0.000288673,(((((6983_5_21:2.0836e-05,6925_4_2:4.0895e-05)0.324:7.472e-06,6823_6_18:1.524e-05)0.949:3.2692e-05,((6736_8_7:3.935e-06,(6807_3_20:0.003469162,6631_4_17:3.1804e-05)0.898:2.1661e-05)0.666:5.4537e-05,7011_5_11:1.0745e-05)0.658:4.3139e-05)0.998:0.000130649,((((6631_5_18:3.288e-06,(6630_4_15:3.753e-06,6730_6_9:1.3139e-05)0.788:5.139e-06)0.902:2.4028e-05,(6731_2_20:6.973e-06,(6680_4_12:3.409e-06,6731_3_16:6.698e-06)0.870:6.873e-06)1.000:0.000355543)1.000:0.000530765,(6983_5_24:3.589e-06,(6983_2_20:1.2857e-05,7054_5_10:1.3799e-05)0.220:4.362e-06)1.000:0.000265483)0.998:0.00032476,6730_7_11:0.000499015)0.999:0.000403626)0.999:0.000333942,((6899_4_8:2.6515e-05,6823_4_18:1.6947e-05)1.000:0.000165468,((6823_2_17:4.2159e-05,(7092_6_13:3.7826e-05,((6775_2_1:1.0191e-05,6775_1_15:1.1958e-05)0.989:3.2463e-05,(7004_8_80:3.461e-06,((7038_6_3:3.3209e-05,(6949_2_21:3.4891e-05,7038_6_21:9.506e-06)0.342:5.51e-06)0.949:2.4099e-05,7004_8_79:3.628e-06)0.388:4.825e-06)0.966:2.2837e-05)0.934:2.6132e-05)1.000:0.000276414)0.596:1.5055e-05,(6631_2_17:1.7374e-05,(6807_1_3:3.5905e-05,7038_7_8:2.9928e-05)0.709:1.1094e-05)0.552:9.529e-06)1.000:0.000966665)0.966:0.0002523)1.000:0.000444001)1.000:0.000472614,6823_7_18:7.8295e-05)0.605:0.000266931,(((((6899_4_3:1.6732e-05,6925_4_10:1.4614e-05)1.000:0.000115262,(6949_4_14:9.6662e-05,6972_3_11:6e-09)0.980:0.000149727)0.686:3.9183e-05,6949_4_18:7.6425e-05)0.974:0.000107801,7054_4_21:8.5237e-05)1.000:0.000128073,(7011_6_8:1.7049e-05,(7011_5_4:2.9281e-05,7011_4_4:6.052e-06)0.803:1.2607e-05)1.000:0.000129598)0.963:8.5925e-05)1.000:0.012294346)1.000:0.018169402,(7038_7_20:0.01736492,((6593_4_12:6e-09,6593_4_23:9.991e-06)1.000:0.000385551,(6736_4_11:3.0908e-05,7004_6_47:4.1947e-05)1.000:0.000193658)1.000:0.017331065)1.000:0.006657819)1.000:0.006882361)1.000:0.006941523)1.000:0.005252265,(((7038_7_2:0.002268301,((6730_8_8:0.000799467,(((((6899_5_14:9.917e-06,6899_5_11:3.973e-06)0.996:4.257e-05,6755_5_23:8.137e-05)0.935:1.8363e-05,7004_8_95:5.518e-05)0.869:1.4109e-05,(((7054_5_22:1.2152e-05,7054_5_3:1.3151e-05)0.881:1.2893e-05,7054_5_11:9.564e-06)0.986:2.4788e-05,7004_5_14:3.018e-05)0.521:3.22e-07)0.994:6.5585e-05,6949_2_19:0.003375391)1.000:0.000855178)1.000:0.000577204,(6841_7_8:2.0769e-05,(((6631_3_20:1.1598e-05,6673_8_10:6.173e-06)0.965:1.8879e-05,6753_3_17:9.221e-06)0.541:1.297e-06,6710_8_6:3.469e-06)0.884:1.4971e-05)0.957:3.6495e-05)1.000:0.000148043)1.000:0.004794663,((((((7038_6_6:3.1647e-05,7004_6_27:4.299e-06)0.782:8e-09,7004_8_82:1.4007e-05)0.794:1.6667e-05,7054_4_22:1.8637e-05)0.965:8e-09,7011_3_7:3.343e-06)1.000:0.000156491,((6925_6_4:4.832e-06,(6710_6_2:2.3641e-05,6736_5_8:1.4282e-05)0.991:3.7686e-05)0.911:1.8821e-05,6899_4_6:0.000306855)0.999:6.6367e-05)1.000:0.000173979,((6925_3_10:1.9846e-05,(7004_8_74:6.936e-06,7038_6_7:2.556e-05)0.934:1.1224e-05)0.747:5.75e-06,7038_8_41:1.789e-05)1.000:0.007982901)0.669:0.003520959)1.000:0.034763583,(6631_3_24:0.036092868,(6730_8_4:0.021007453,(6731_3_9:0.008002453,6925_5_3:0.006382235)1.000:0.014800942)1.000:0.01687062)0.548:0.005101949)1.000:0.005805974)0.936:0.002608715,((((6680_8_15:6.2265e-05,6710_7_16:6.7652e-05)1.000:0.000132174,(((6805_2_16:3.5516e-05,6755_4_3:2.063e-05)0.763:3.944e-06,(6731_2_8:4.9924e-05,6630_2_5:2.7642e-05)0.743:3.734e-06)0.928:1.2276e-05,(6753_1_21:1.0318e-05,6840_1_21:3.4172e-05)1.000:5.9969e-05)1.000:0.000233912)1.000:0.03130584,(((6731_2_1:6.6477e-05,6983_2_3:7.7746e-05)1.000:0.000845691,(6664_1_1:1.5359e-05,6593_5_9:1.3413e-05)1.000:0.000974036)1.000:0.000971216,(((6871_2_19:1.469e-05,6925_3_13:2.6191e-05)0.969:2.7093e-05,6840_3_3:0.000341237)0.785:8e-09,6664_1_20:6.2733e-05)1.000:0.000699192)1.000:0.033074667)1.000:0.007340658,(((7004_6_29:1.8122e-05,7004_7_64:1.0481e-05)1.000:0.005054038,(((6680_7_16:1.9762e-05,6755_5_22:2.5533e-05)1.000:8.1962e-05,(6710_6_19:1.9994e-05,6899_6_1:3.1353e-05)1.000:6.0668e-05)1.000:0.000232654,(6755_2_8:0.00018303,(6631_4_11:1.7118e-05,6631_6_3:6e-09)1.000:0.006414203)0.245:7.7583e-05)1.000:0.006678028)1.000:0.021577501,(7038_7_11:0.000457181,(6259_8_19:6.1563e-05,(7011_5_19:9.0239e-05,(6680_6_19:4.5156e-05,6730_1_22:7.6608e-05)0.850:8.361e-06)0.787:6.721e-06)1.000:0.000305549)1.000:0.028155591)1.000:0.007460358)1.000:0.005736835)1.000:0.002883362,(((((6673_8_11:6e-09,(((6731_2_23:1.3875e-05,6641_6_12:1.3882e-05)0.765:3.457e-06,6680_6_4:1.0326e-05)0.000:6e-09,6631_2_4:1.0335e-05)0.841:1.0655e-05)1.000:0.035769661,(6753_3_14:0.009789363,(6730_7_5:0.006476917,((6938_6_15:3.436e-06,(7011_4_21:1.0778e-05,(7004_5_22:6e-09,(7038_6_23:1.0247e-05,(7038_4_1:5.466e-06,7011_4_18:3.391e-06)0.787:5.429e-06)0.794:5.477e-06)0.893:6e-09)0.927:1.0346e-05)1.000:0.010530412,(6753_1_23:3.4603e-05,6805_6_5:3.5739e-05)1.000:0.008553394)0.984:0.002097903)1.000:0.005064232)1.000:0.023089902)0.807:0.007046244,(6731_4_10:0.002678644,((((6755_4_12:1.4602e-05,6805_6_2:9.314e-06)0.435:6.069e-06,(6840_3_23:1.581e-05,6972_2_1:0.000833563)1.000:0.000277197)1.000:0.000934988,(6680_7_20:2.414e-05,6649_7_7:2.5163e-05)0.947:1.6915e-05)0.980:3.0579e-05,(6259_6_13:6.05e-05,6259_5_10:5.3029e-05)1.000:0.000100768)1.000:0.001153261)1.000:0.035323455)1.000:0.00374682,(6649_7_17:0.040504952,(6736_5_5:0.000138362,((((((6731_2_6:6e-09,6731_6_11:1.0256e-05)0.957:4.4452e-05,((6983_3_57:4.3019e-05,6983_8_73:6.948e-06)0.890:1.1962e-05,6949_3_24:1.8629e-05)0.523:8.019e-06)0.888:3.7702e-05,(6925_4_4:1.1426e-05,6983_2_24:1.3648e-05)1.000:9.1111e-05)0.764:5.9282e-05,(6925_4_1:3.7667e-05,6830_3_9:1.9491e-05)0.741:3.909e-06)0.294:7.8975e-05,((((6755_5_13:1.4672e-05,6805_7_1:7.115e-06)0.961:1.5327e-05,6730_5_20:1.3569e-05)0.825:2.2065e-05,(6755_3_12:7.046e-06,6714_7_15:5.5964e-05)0.879:3.2206e-05)0.734:2.7183e-05,((6841_7_10:1.0487e-05,6736_8_18:1.6712e-05)0.982:2.1217e-05,(6730_1_5:1.7551e-05,6730_5_6:1.0255e-05)0.929:1.3138e-05)0.945:1.0381e-05)0.419:1.9257e-05)0.842:9.329e-06,6755_2_3:3.3126e-05)1.000:0.000129873)1.000:0.033538077)1.000:0.008283091)1.000:0.006393497,((((6731_3_10:0.000192576,(6736_6_20:2.5331e-05,6736_7_17:2.423e-05)1.000:0.001264683)1.000:0.001970104,((6259_7_21:3.7834e-05,6755_3_19:3.482e-06)0.855:9.294e-06,((6972_4_17:4.5293e-05,(6949_4_5:1.039e-05,(7004_6_36:3.0193e-05,7068_4_17:6.977e-06)0.869:8.681e-06)0.924:1.3063e-05)0.917:1.1272e-05,((6983_8_82:1.4872e-05,6983_8_83:8.491e-06)0.987:2.7607e-05,7004_8_88:3.1172e-05)0.736:4.116e-06)0.928:1.483e-05)1.000:0.000860424)1.000:0.042484242,((((6631_1_18:1.3701e-05,(6631_3_8:8.053e-06,6731_4_17:3.395e-06)0.748:3.952e-06)0.860:9.018e-06,6925_5_9:2.8391e-05)1.000:0.002188482,(6731_6_22:0.000337918,(6259_7_5:0.000161904,(6631_6_20:0.000166124,6730_6_13:0.000347989)1.000:0.000184626)0.849:1.851e-05)1.000:0.000929275)1.000:0.017675658,((6736_5_24:0.000197184,(((6593_5_20:2.0521e-05,6593_5_24:1.4022e-05)0.727:3.708e-06,(6871_1_23:2.1424e-05,(7038_4_10:1.3207e-05,7004_5_19:1.081e-05)0.799:1.027e-05)0.917:1.5686e-05)1.000:0.000125732,6949_4_8:0.000117466)0.962:2.6215e-05)1.000:0.01047522,(6823_7_3:0.000465769,(((6673_8_1:1.3916e-05,6641_6_2:1.9437e-05)0.308:3.322e-06,6680_8_24:1.0523e-05)0.941:2.7718e-05,(6755_2_4:6.9e-06,6730_7_20:1.7256e-05)0.997:6.2129e-05)0.999:0.000109043)1.000:0.006033472)1.000:0.011441699)1.000:0.01931507)1.000:0.005779048,((((((((((6925_3_16:1.7265e-05,6805_4_3:1.0309e-05)0.963:1.7163e-05,6731_6_9:3.383e-06)1.000:0.000871875,(6899_6_6:3.018e-05,6731_2_22:2.3735e-05)0.979:2.5745e-05)0.957:2.0957e-05,6631_1_5:6.2177e-05)1.000:0.002988311,6938_8_5:5.2721e-05)0.866:0.001070073,((((6899_6_23:2.5188e-05,(((6714_7_24:0.000170765,6899_6_22:0.000150301)0.993:6.7978e-05,(6805_5_21:3.1442e-05,6938_6_20:2.1288e-05)1.000:0.000148834)1.000:0.000467313,(6823_4_11:3.491e-06,6983_3_50:2.7506e-05)0.976:2.3045e-05)0.911:3.5452e-05)0.809:1.8777e-05,6823_6_2:1.7078e-05)0.949:7.2285e-05,6823_6_23:1.4616e-05)0.318:3.9658e-05,6823_2_14:3.7378e-05)0.968:0.000103369)1.000:0.000710082,((((6949_2_1:0.000157081,6972_3_18:0.000141859)0.988:7.936e-05,6949_4_13:3.0427e-05)0.897:2.9558e-05,((7004_5_16:9.4405e-05,(7054_6_14:3.463e-06,7054_5_19:1.0389e-05)0.806:3.48e-06)0.000:8e-09,6925_3_7:2.1769e-05)0.685:4.1281e-05)1.000:0.000136967,((7004_7_65:2.0668e-05,((7011_5_8:1.2393e-05,((((6753_3_22:3.707e-06,6830_3_18:1.5197e-05)0.949:2.6674e-05,((6736_5_17:3.494e-06,6925_7_12:3.9963e-05)0.879:8.973e-06,6753_4_6:4.543e-06)0.906:3.9571e-05)0.887:8e-09,6731_1_3:1.7138e-05)0.922:0.000183286,(6753_3_2:5.9378e-05,(6830_3_3:3.7921e-05,6925_3_5:2.475e-05)0.947:2.7002e-05)0.999:0.000211919)0.971:3.9968e-05)0.853:1.6461e-05,6938_8_9:3.454e-06)0.753:6.893e-06)0.752:5.348e-06,6949_3_3:6e-09)0.980:4.2121e-05)1.000:0.001797245)1.000:0.0100773,((6938_6_3:1.1774e-05,6972_3_4:2.6402e-05)1.000:0.002642463,((6710_7_14:6.322e-06,6753_1_7:7.427e-06)1.000:0.012860191,((6680_7_11:1.3593e-05,6755_5_18:6e-09)1.000:0.005179079,(6731_1_5:6e-09,(6710_6_17:2.0912e-05,6755_6_7:6.794e-06)0.879:6.984e-06)1.000:0.006360398)0.560:0.001248989)1.000:0.001502714)1.000:0.009978757)1.000:0.016962971,((6949_3_19:3.4787e-05,7011_3_17:6e-09)1.000:0.027286024,(6805_2_11:0.000184428,(6731_2_5:2.4585e-05,6983_2_15:2.64e-05)1.000:0.00018988)1.000:0.022771938)1.000:0.0068042)1.000:0.014645521,(((6753_3_11:3.6079e-05,6823_4_3:2.117e-05)1.000:0.001529967,(6983_3_67:9.3005e-05,((6731_2_15:3.419e-06,6710_8_23:1.7406e-05)1.000:0.000820635,(((7092_6_19:1.7741e-05,7068_4_15:7.037e-06)0.941:1.4402e-05,6871_2_21:2.8187e-05)1.000:0.000185079,(6830_3_8:7.011e-06,(6710_6_21:1.3956e-05,6805_6_15:0.000122385)0.781:6.1181e-05)0.805:9.1411e-05)0.999:0.000108886)0.744:8.074e-06)1.000:0.001167909)1.000:0.035815552,(6731_3_13:0.032143507,(((6983_5_19:0.000287415,(6736_4_22:3.8887e-05,(6949_3_8:1.0771e-05,6949_3_7:1.0541e-05)0.941:1.5212e-05)0.993:9.424e-05)1.000:0.005634484,((((6840_1_4:1.859e-05,6807_1_17:6.796e-06)0.980:2.9149e-05,6805_3_22:3.973e-06)0.769:3.923e-06,6755_6_17:3.372e-06)1.000:0.001309082,(6731_5_10:0.00029685,6680_7_13:0.002902794)1.000:0.000395198)1.000:0.00327016)1.000:0.007956575,(6840_1_14:0.011365791,6823_2_6:0.019135834)1.000:0.006120233)1.000:0.014677277)1.000:0.006691184)1.000:0.006024514)0.988:0.00368264)0.831:0.003524508)0.998:0.002497362)1.000:0.002624651)1.000:0.002396827)0.977:0.002433847,(((((6823_6_7:0.000147795,((((((6823_5_2:1.0604e-05,(6899_4_4:3.6133e-05,6925_4_3:6e-09)0.924:1.8616e-05)0.896:1.9825e-05,6731_1_7:2.3796e-05)0.912:1.9284e-05,(6631_6_9:1.3072e-05,(6730_6_20:2.3195e-05,6680_8_20:6.846e-06)0.757:4.061e-06)0.729:3.923e-06)1.000:7.5327e-05,((6807_2_4:2.0179e-05,(6807_3_2:1.3282e-05,6807_1_6:6.264e-06)0.581:1.5006e-05)0.744:4.832e-06,6755_6_20:2.0652e-05)1.000:6.1977e-05)0.564:3.772e-06,(7092_6_11:1.0867e-05,(6972_3_12:1.4013e-05,(6983_4_85:2.2722e-05,(6823_2_16:6.767e-06,6925_5_24:1.4776e-05)0.854:9.622e-06)0.442:3.544e-06)0.997:3.5727e-05)0.996:3.3667e-05)0.998:5.0664e-05,((7011_5_9:9.59e-06,(7004_5_12:6e-09,(7038_4_6:3.351e-06,(7038_7_16:3.6541e-05,7054_6_8:2.6299e-05)0.637:6e-09)0.877:6e-09)0.911:2.6376e-05)0.996:4.7033e-05,(6710_7_2:1.801e-05,6805_6_10:1.3237e-05)0.961:1.8127e-05)1.000:0.000117296)0.973:4.7319e-05)0.987:0.000347977,7038_8_45:9.1999e-05)1.000:0.008214918,((6871_2_6:0.000958822,(((6805_6_13:2.1966e-05,(6899_4_2:7.221e-06,6899_4_5:2.0597e-05)0.988:3.1651e-05)0.820:8.784e-06,(6938_5_21:2.0395e-05,(6972_5_11:9.871e-06,6938_8_7:2.5309e-05)0.951:2.0376e-05)0.676:7.382e-06)1.000:0.000349857,((((6680_6_14:4.1624e-05,(6731_4_6:5.1011e-05,6736_5_3:6.5623e-05)0.190:3.663e-06)0.987:1.5e-08,((6680_7_5:3.309e-06,6731_3_18:1.081e-05)0.987:2.5437e-05,(6630_3_20:1.1481e-05,(6753_4_9:1.024e-05,6983_5_6:3.1542e-05)0.748:3.852e-06)0.961:1.8443e-05)0.997:3.6818e-05)0.963:2.3463e-05,(((6925_6_19:3.2779e-05,6983_8_75:1.154e-05)0.962:1.67e-05,(6899_7_2:1.3888e-05,(6823_6_15:1.7684e-05,(7004_5_24:3.3023e-05,6983_5_10:1.2998e-05)0.921:1.234e-05)0.754:3.883e-06)0.953:1.698e-05)0.796:8.474e-06,((((7004_8_85:1.3117e-05,7054_4_20:3.815e-06)0.979:2.1077e-05,6983_7_70:3.1063e-05)0.882:1.3804e-05,6925_8_5:1.674e-05)0.995:3.033e-05,(((6938_3_26:1.6502e-05,6938_3_29:1.4879e-05)0.757:4.931e-06,6938_3_31:9.9e-06)0.987:2.3032e-05,6823_6_11:3.9419e-05)0.926:9.824e-06)0.972:1.6544e-05)0.850:1.083e-05)1.000:0.000315943,(6259_7_22:0.001081322,(6755_5_7:0.000127245,(((6805_7_2:4.6555e-05,6823_6_22:3.1885e-05)1.000:0.000270776,(6823_1_14:3.6037e-05,((6731_3_4:1.3106e-05,6755_2_12:1.9689e-05)0.758:3.289e-06,6730_8_6:3.624e-06)0.995:2.5564e-05)0.871:7.091e-06)0.965:4.9075e-05,(6972_3_24:1.9911e-05,6805_7_20:1.9943e-05)0.994:4.2267e-05)1.000:0.00029264)0.799:7.1842e-05)1.000:0.001544062)0.196:0.000143596)1.000:0.000372129)0.831:0.00061138,(6949_1_7:1.999e-05,6983_5_3:1.6765e-05)1.000:0.002136403)1.000:0.008135272)1.000:0.026475541,((((((6840_3_11:2.0531e-05,6840_3_6:6e-09)0.993:5.7314e-05,(6731_6_16:2.682e-05,6899_7_16:3.0662e-05)0.983:3.5142e-05)0.908:1.6676e-05,(((6736_6_11:5.7362e-05,(6630_3_9:7.274e-06,6630_1_15:1.5803e-05)1.000:9.4047e-05)0.910:6e-09,((6630_2_12:6.709e-06,(6755_4_10:1.3339e-05,6755_1_10:6.675e-06)0.744:3.331e-06)0.760:3.331e-06,(6805_2_15:1.0003e-05,6730_3_7:1.0012e-05)0.957:1.3321e-05)0.967:1.3308e-05)0.931:1.6265e-05,6925_5_8:4.3875e-05)0.728:4.937e-06)0.842:5.075e-06,(((((6736_4_18:1.0989e-05,(6731_3_22:1.0909e-05,6755_5_17:6e-09)0.145:3.619e-06)1.000:6.0927e-05,((6753_4_16:1.4132e-05,6805_4_11:8.076e-06)0.788:1.1114e-05,6823_1_3:3.872e-06)0.961:2.5571e-05)0.870:7.429e-06,((6938_6_22:1.0581e-05,(7038_4_14:3.376e-06,7004_7_52:1.687e-05)0.769:3.552e-06)0.412:3.578e-06,(6972_4_14:1.6861e-05,7011_5_14:1.1162e-05)0.758:5.854e-06)0.998:3.9035e-05)0.753:3.312e-06,(6983_2_7:3.372e-06,7038_8_44:2.5839e-05)0.987:2.2042e-05)0.996:3.0301e-05,((7004_5_13:1.0085e-05,(7011_4_19:6.735e-06,6938_6_11:6.735e-06)0.744:3.354e-06)0.992:2.3424e-05,((6899_5_9:1.9781e-05,(6938_6_4:9.807e-06,7011_4_12:1.3501e-05)0.902:9.754e-06)0.878:9.405e-06,(((((7038_4_22:3.379e-06,7038_4_23:6e-09)0.776:3.36e-06,((((6949_2_6:7.233e-06,6925_7_17:8.101e-06)0.443:6.768e-06,7004_6_42:2.3102e-05)0.840:5.302e-06,6938_7_17:6.722e-06)0.643:6e-09,6983_6_28:6e-09)0.759:3.899e-06)0.140:4.481e-06,(6983_6_27:3.369e-06,7011_6_9:6e-09)0.503:6e-09)0.882:1.4756e-05,(7011_4_10:9.307e-06,7004_8_92:7.525e-06)0.541:8.25e-06)0.423:4.607e-06,(7004_7_70:1.5884e-05,7004_7_68:6e-09)0.439:6.59e-06)0.266:5.098e-06)0.998:3.716e-05)0.831:5.709e-06)0.257:6e-09)1.000:0.004227019,((((6631_6_23:4.223e-06,(6630_3_24:1.0159e-05,6755_3_11:6.76e-06)0.664:2.546e-06)1.000:0.00834976,6680_7_21:0.00766094)1.000:0.001372126,((7054_5_9:1.042e-05,7054_5_20:2.6154e-05)0.886:7.586e-06,(6805_4_2:6.9375e-05,6983_6_42:1.8894e-05)0.791:4.874e-06)1.000:0.002088435)1.000:0.000688427,((((6823_6_5:4.316e-06,(7011_4_15:1.0182e-05,7038_5_12:1.3519e-05)1.000:0.001352391)1.000:0.005011828,((((((((6805_4_17:2.3296e-05,(6753_4_10:1.3397e-05,6805_5_5:1.3645e-05)0.000:6e-09)0.872:6.854e-06,6631_6_17:3.531e-06)0.991:2.9608e-05,((6823_4_15:4.1908e-05,(6983_7_49:1.5818e-05,6925_8_21:1.6806e-05)0.897:8.014e-06)0.972:3.1007e-05,(6899_6_10:2.1716e-05,6823_3_21:4.323e-06)0.873:1.3127e-05)0.707:3.008e-06)0.157:8e-09,(((6938_8_24:1.6307e-05,6972_2_9:6.705e-06)0.771:4.062e-06,(7011_4_11:1.3022e-05,7038_7_24:2.0109e-05)0.935:1.6431e-05)0.012:6e-09,(6938_6_5:1.4405e-05,6972_3_20:2.3344e-05)0.759:4.659e-06)0.943:1.0927e-05)0.859:1.167e-05,(6925_7_1:1.2666e-05,7038_7_4:2.8061e-05)0.568:1.0241e-05)0.747:5.414e-06,6949_2_14:6.174e-06)0.811:1.4186e-05,(6925_8_19:9.666e-06,(7011_6_21:1.4902e-05,7004_8_78:4.375e-06)0.909:8.769e-06)0.867:6.98e-06)0.997:0.000155853,(6983_6_41:7.465e-06,(7038_7_10:1.7108e-05,6938_8_23:9.96e-06)0.800:6.741e-06)0.983:4.0271e-05)0.770:9.259e-06)1.000:0.003556299,(6823_4_1:8.2802e-05,(6949_1_16:1.4733e-05,7038_8_35:1.3667e-05)0.990:4.3361e-05)1.000:0.000697009)1.000:0.000318516,((6736_8_10:4.594e-06,(7054_5_24:2.3446e-05,7054_6_19:3.56e-06)0.982:2.6051e-05)1.000:0.003022874,((6938_3_36:1.3787e-05,7068_4_11:9.923e-06)1.000:0.00028255,(((((6714_8_18:2.2805e-05,(6730_5_9:3.461e-06,6714_7_1:2.6287e-05)0.465:3.373e-06)0.879:6.846e-06,6631_4_12:1.6363e-05)0.765:3.366e-06,6630_3_8:1.6156e-05)0.658:6e-09,6630_2_2:1.3139e-05)0.992:4.046e-05,(((6823_6_6:3.925e-06,6899_7_18:5.7936e-05)0.920:2.3192e-05,(6823_7_11:1.9875e-05,6899_4_14:1.0841e-05)0.882:1.0381e-05)0.974:2.825e-05,((6899_4_15:7.09e-06,6899_6_19:2.3128e-05)0.982:2.2639e-05,((6755_5_9:2.098e-05,6731_4_2:3.289e-06)0.744:5.242e-06,(6807_3_23:1.5291e-05,6731_1_14:3.303e-06)0.892:7.589e-06)0.955:1.7391e-05)0.969:1.9849e-05)0.668:4.013e-06)1.000:0.000576404)0.966:5.2449e-05)1.000:0.001341724)0.725:6.737e-06)1.000:0.002111478)1.000:0.036903449,(((6710_7_17:0.00159076,((6736_4_19:8.083e-06,((6736_6_8:3.804e-06,6736_8_19:3.37e-06)0.954:1.1391e-05,(6753_2_5:6.893e-06,6736_8_16:1.0218e-05)0.940:1.0406e-05)0.732:3.931e-06)1.000:0.000146196,(6736_7_14:0.001467526,((6823_4_24:2.2701e-05,(6710_7_21:7.257e-06,6753_1_15:6.878e-06)0.865:7.973e-06)1.000:0.000150846,(6807_1_9:0.000196528,6807_2_9:0.000265898)0.829:1.1029e-05)0.797:6.396e-06)0.840:6e-09)1.000:8.0329e-05)0.999:0.00021159,(((6710_6_10:1.0126e-05,(6805_4_16:6.742e-06,(6925_3_14:6.935e-06,6871_2_20:3.5559e-05)0.968:4.9478e-05)0.770:8.436e-06)0.442:6e-09,(6736_5_19:4.035e-06,(6755_6_2:1.034e-05,6753_4_17:3.382e-06)0.691:6e-09)0.890:8.303e-06)0.990:4.8962e-05,((((6730_6_8:2.2063e-05,((6710_7_11:6.732e-06,6755_6_5:1.3465e-05)0.865:7.767e-06,6871_2_8:2.5674e-05)0.950:1.702e-05)0.000:6e-09,(6775_2_21:1.2289e-05,(6925_4_7:1.8641e-05,6899_6_7:3.2332e-05)0.948:1.762e-05)0.816:6.771e-06)0.966:1.7978e-05,(((6731_4_20:6.797e-06,((6631_3_15:6.732e-06,(6673_8_4:1.7068e-05,(6710_6_18:4.4077e-05,(((((6641_6_9:7.516e-06,6649_8_2:6.74e-06)0.401:6e-09,(6730_7_14:6.742e-06,6631_3_13:6e-09)0.922:6.724e-06)0.925:3.734e-06,(((((((6899_6_3:1.8363e-05,6899_4_9:7.297e-06)0.986:2.3843e-05,(6753_1_4:1.7968e-05,6731_6_3:3.373e-06)0.886:7.184e-06)0.940:1.5439e-05,6805_5_20:1.3288e-05)0.000:6e-09,6259_8_4:2.9904e-05)0.483:6e-09,(6730_3_20:6.754e-06,(6710_8_22:1.0167e-05,(6731_2_2:3.375e-06,6730_4_12:6.736e-06)0.791:6e-09)0.632:6e-09)0.879:6.775e-06)0.330:6e-09,6730_4_1:1.3479e-05)0.498:6e-09,6673_8_13:3.417e-06)0.124:6e-09)0.905:1.3875e-05,(6680_6_3:3.366e-06,6731_6_13:6.756e-06)0.822:3.366e-06)0.888:8e-09,6641_6_7:1.0154e-05)0.000:8e-09)0.331:1.5e-08)0.620:3.253e-06)0.802:5.241e-06,6731_6_21:6.742e-06)0.917:8.6e-08)0.142:6e-09,(((((6925_5_5:9.236e-06,7011_3_18:7.927e-06)1.000:0.00053258,((6899_6_12:2.7076e-05,6871_1_7:1.0156e-05)0.921:1.0184e-05,7054_6_15:1.0113e-05)0.865:1.2476e-05)0.874:7.894e-06,((((7004_8_96:5.3684e-05,((6753_2_14:2.2281e-05,6736_6_1:9.499e-06)0.936:2.0686e-05,(6841_7_9:5.5146e-05,6841_7_6:3.554e-06)0.365:3.796e-06)0.432:4.234e-06)0.871:1.7344e-05,6925_5_20:6.901e-06)0.118:6e-09,(6972_4_7:1.012e-05,6823_3_10:6.761e-06)0.935:1.0096e-05)0.891:1.2111e-05,((6983_8_74:1.9019e-05,6972_2_21:3.464e-06)0.920:1.1427e-05,(((6925_7_15:1.6912e-05,6983_3_49:2.4682e-05)0.759:5.047e-06,6972_4_18:1.5048e-05)0.931:1.8006e-05,(6972_5_4:1.4781e-05,6938_7_15:3.461e-06)0.933:1.4803e-05)0.480:6e-09)0.859:7.891e-06)0.365:6.273e-06)0.727:5.124e-06,6823_4_14:6.76e-06)0.938:1.5247e-05,6649_7_8:1.7096e-05)0.752:5.088e-06)0.752:3.783e-06,6731_2_13:0.001203758)0.780:3.751e-06)0.337:6e-09,(6805_5_3:1.6854e-05,(((6972_3_7:1.0818e-05,6972_5_24:1.5405e-05)0.771:6.677e-06,6983_6_38:2.9e-08)0.553:5.819e-06,6925_8_10:6.787e-06)0.964:2.1247e-05)0.999:4.7525e-05)1.000:0.001804947)1.000:0.000442101)1.000:0.003599534,(((((6736_6_2:0.001158329,(((6753_3_19:6.733e-06,6805_5_14:1.0655e-05)0.940:1.5985e-05,(6899_6_18:3.6724e-05,6805_6_3:3.587e-06)0.777:5.741e-06)0.819:7.923e-06,(((((6730_3_4:6e-09,6731_1_4:6e-09)0.306:6e-09,(6730_1_17:6.737e-06,6731_4_16:3.373e-06)0.838:3.364e-06)0.997:2.5866e-05,6630_3_18:4.9e-06)0.000:6e-09,(6714_8_22:3.367e-06,6755_4_21:7.021e-06)0.058:6e-09)0.881:1.1995e-05,((6680_8_1:3.366e-06,6731_3_12:3.952e-06)0.761:3.938e-06,6680_7_7:7.019e-06)0.000:6e-09)0.952:2.1785e-05)0.447:6e-09)0.408:6e-09,6730_4_7:2.7136e-05)0.899:3.5928e-05,((((((6823_7_2:0.00030769,((7038_8_28:1.649e-05,7068_4_7:2.9428e-05)0.789:7.08e-06,6736_5_14:6e-09)0.769:6.035e-06)0.944:1.8192e-05,((6983_5_11:3.6975e-05,6823_2_5:1.8168e-05)0.938:1.2099e-05,(6775_1_7:1.6677e-05,((6775_2_3:8.625e-06,(6736_7_16:1.0007e-05,6753_1_2:6e-09)0.952:1.1154e-05)0.354:6e-09,6731_3_11:4.106e-06)0.883:6e-09)0.823:1.3806e-05)0.952:1.6253e-05)0.760:5.443e-06,((((6983_5_23:6e-09,(7011_6_12:1.6726e-05,7004_7_56:1.1231e-05)0.896:1.3872e-05)0.873:9.888e-06,7038_8_30:1.0548e-05)0.227:6.271e-06,(7038_5_1:1.7444e-05,(6949_2_10:4.243e-06,(6938_7_18:6.22e-06,6871_2_5:4.3729e-05)0.565:2.204e-06)0.795:2.7451e-05)0.881:2.3657e-05)0.990:6.0661e-05,6830_3_6:3.6189e-05)0.794:1.2046e-05)0.904:3.7187e-05,((6753_4_14:7.052e-06,(6631_5_16:1.0007e-05,6755_3_20:5.324e-06)0.764:5.3e-06)0.937:1.7393e-05,(6680_6_24:1.6791e-05,(6840_3_4:2.6661e-05,6755_4_11:1.7704e-05)0.486:6e-09)0.998:4.2613e-05)0.959:4.022e-05)0.884:1.9155e-05,((6730_3_11:6e-09,(6631_7_4:3.335e-06,6730_7_3:6.681e-06)0.000:6e-09)0.996:2.9954e-05,((((6805_3_23:6.818e-06,6710_7_8:9.991e-06)0.761:3.402e-06,(7038_8_48:6e-09,6925_4_23:1.1956e-05)0.991:4.7073e-05)0.895:9.994e-06,((6714_8_12:6e-09,(6823_3_6:4.1992e-05,(6753_1_20:4.3571e-05,6775_2_11:4.116e-06)0.046:1.1e-08)0.626:2.9767e-05)0.816:1.8262e-05,(6730_5_19:4.662e-06,6631_6_12:7.582e-06)0.854:2.1807e-05)0.085:4.048e-06)0.926:9.7832e-05,(6731_4_19:6e-09,6755_6_15:1.2507e-05)0.964:2.08e-05)0.858:3.2318e-05)0.000:6e-09)0.999:0.000124691,((6710_6_1:1.5195e-05,(6805_2_17:6.98e-06,6736_5_2:6e-09)0.726:3.63e-06)0.995:3.9094e-05,((6731_4_11:3.372e-06,6755_3_13:3.196e-06)0.582:1.38e-07,(((6925_8_22:5.1483e-05,(6949_3_21:6e-09,7004_6_31:1.3714e-05)0.523:1.3904e-05)0.125:1.0918e-05,6983_6_47:2.7818e-05)0.990:7.6354e-05,(6714_7_11:1.0111e-05,6755_4_16:6e-09)0.871:7.532e-06)0.745:1.185e-05)0.977:5.8592e-05)0.773:4.7466e-05)0.961:3.5679e-05)1.000:0.003091659,((6680_6_22:1.01e-05,((6673_8_6:2.3073e-05,(6925_4_8:2.4631e-05,6823_5_5:1.551e-05)0.945:1.2084e-05)0.738:5.283e-06,(6730_3_23:3.469e-06,(6631_7_7:1.263e-06,(6731_2_21:5.452e-06,6680_6_5:1.7047e-05)0.735:7.846e-06)0.783:8.116e-06)0.416:5.781e-06)1.000:0.000231672)0.312:1.1e-08,((6631_6_16:3.4538e-05,(6664_1_15:2.0279e-05,6593_5_18:5.063e-06)0.784:5.079e-06)0.029:8e-09,(6631_3_2:3.371e-06,(((6805_3_18:1.1776e-05,((6925_7_8:1.8938e-05,(6807_1_8:1.07e-05,(6823_1_16:6.702e-06,(6938_7_10:5.5732e-05,(6949_3_12:1.5317e-05,6983_7_60:6.701e-06)0.951:1.1632e-05)0.456:6e-09)0.763:4.544e-06)0.878:1.8e-05)0.647:2.2938e-05,6899_4_21:1.8848e-05)0.734:1.4972e-05)0.864:1.1659e-05,(((6755_4_19:1.0054e-05,6755_3_4:1.3482e-05)0.942:3.0033e-05,6730_4_21:3.368e-06)0.759:1.9973e-05,6731_3_5:6e-09)0.477:6e-09)0.655:2.7485e-05,6631_1_9:3.377e-06)0.886:2.3629e-05)0.843:1.1819e-05)0.925:4.1163e-05)1.000:0.000971739)1.000:0.0008501,6949_3_22:0.000220011)1.000:0.006222097)1.000:0.03404269)1.000:0.006280381)1.000:0.003751312,((6899_6_20:3.943e-05,(6983_8_85:1.0768e-05,6823_3_1:2.2403e-05)0.917:1.6705e-05)1.000:0.034959803,(6823_7_4:0.017836501,(6983_2_12:3.6384e-05,(6755_1_13:1.0137e-05,((6755_2_6:2.1831e-05,(6805_5_17:2.2306e-05,6805_7_9:8.581e-06)0.936:1.4509e-05)0.752:6.725e-06,(6731_6_6:1.1623e-05,6736_7_20:5.971e-06)0.739:7.603e-06)0.795:1.4448e-05)0.581:2.795e-06)1.000:0.01764852)1.000:0.016245018)1.000:0.005045546)0.803:0.003398049)1.000:0.002507009,((((6925_7_13:0.011769155,((7054_4_14:0.000919899,(((6823_5_3:0.000110487,(6807_1_22:3.773e-06,6807_3_4:1.4739e-05)0.999:7.6829e-05)1.000:0.005571645,(6899_6_17:1.6981e-05,6983_4_93:4.025e-06)1.000:0.003943662)1.000:0.000283757,7004_6_43:0.001915619)1.000:0.002816394)1.000:0.000996446,((6823_1_2:1.35e-05,(6805_5_13:1.6806e-05,(6840_1_7:1.2542e-05,6871_1_13:1.3288e-05)0.721:4.207e-06)0.754:3.347e-06)1.000:0.000533662,(6949_4_12:1.1598e-05,(7054_6_12:1.0991e-05,(7011_5_6:1.8013e-05,(6730_8_22:4.576e-06,6649_7_21:8.457e-06)0.995:6.5087e-05)0.867:2.5923e-05)0.785:1.1877e-05)1.000:0.001099305)1.000:0.000596672)1.000:0.015691763)1.000:0.025606863,(((6755_5_19:0.000858047,6983_6_37:0.00026213)0.680:1.646e-05,((6805_3_7:0.000482778,6899_4_12:0.000118023)1.000:0.000310312,6680_6_15:0.000495924)1.000:0.000189318)1.000:0.000281877,((((7004_8_83:2.3472e-05,(7038_6_8:2.8162e-05,6807_1_10:3.767e-06)0.925:1.3431e-05)0.986:2.8409e-05,(6736_4_24:2.8142e-05,6731_5_23:5.538e-05)0.759:3.564e-06)0.999:6.5265e-05,(6938_5_1:5.8161e-05,(6710_8_18:3.734e-06,6736_8_23:6e-09)0.979:3.666e-05)1.000:0.000102761)1.000:0.001418029,(((6730_8_14:3.396e-06,6755_3_5:1.0289e-05)0.852:6.813e-06,((7004_5_17:2.9894e-05,(6949_1_15:2.2193e-05,6983_4_79:6.843e-06)0.847:1.9602e-05)0.823:1.1275e-05,6972_5_2:2.0274e-05)0.739:6.013e-06)1.000:0.000680304,6899_6_8:0.000248564)0.790:3.2322e-05)0.722:0.000128376)1.000:0.034323598)0.989:0.004397539,(((6736_5_7:0.014791582,((6680_5_21:1.4012e-05,6680_6_2:3.022e-06)1.000:0.00393286,(6899_5_13:0.000238782,(((7038_8_33:5.111e-06,6949_3_2:1.4866e-05)0.389:1.1358e-05,(((6925_5_14:1.4049e-05,6680_4_6:7.478e-06)1.000:0.000204265,((6753_3_21:1.3324e-05,6805_3_4:1.3463e-05)0.884:6e-09,6736_5_20:6.751e-06)0.424:1.0977e-05)0.857:3.3532e-05,6731_4_7:3.363e-06)0.753:8.8202e-05)0.943:8.8467e-05,6972_3_1:6.6099e-05)1.000:0.00523837)1.000:0.000778717)1.000:0.012024777)1.000:0.018656927,(((6871_1_4:3.427e-06,6823_5_20:1.3397e-05)1.000:0.001647611,((6730_1_7:4.8778e-05,6775_2_9:0.000739635)0.669:1.5537e-05,((6983_3_62:3.799e-06,((6938_5_14:1.764e-05,7011_3_20:1.6166e-05)0.781:8.48e-06,(6972_2_8:8.256e-06,(7038_6_11:1.1494e-05,7004_8_87:4.931e-06)0.972:2.986e-05)0.368:5.77e-06)0.873:1.7099e-05)0.992:3.2527e-05,((7011_6_3:1.6391e-05,7004_7_62:8.76e-06)0.992:3.1199e-05,(6949_1_9:6.8633e-05,(6823_4_9:2.5564e-05,6823_3_2:2.9837e-05)0.434:1.2253e-05)1.000:0.000227994)0.879:8.139e-06)0.945:2.2504e-05)1.000:0.000712142)1.000:0.017148837,((((6680_7_3:1.015e-05,6730_5_24:1.7967e-05)1.000:0.000243574,(6925_5_4:6.3715e-05,(7054_4_5:0.000114192,((6925_4_12:1.6807e-05,(6972_3_6:3.349e-06,(6925_8_2:1.006e-05,7004_7_54:2.013e-05)0.745:3.37e-06)0.885:6.735e-06)0.994:2.8991e-05,(6630_2_15:6.727e-06,6630_4_12:1.165e-05)0.921:1.9611e-05)1.000:0.000453964)1.000:8e-09)0.000:6e-09)0.354:2.7816e-05,(6949_2_24:0.003056087,(((7004_8_89:1.0069e-05,(7004_6_44:1.0076e-05,7011_3_9:6.706e-06)0.743:3.493e-06)0.972:2.307e-05,(6925_6_5:3.573e-05,6938_7_9:3.8085e-05)0.992:3.3253e-05)0.999:4.9078e-05,(6649_7_14:0.00105517,(((6949_3_14:1.6847e-05,7004_7_61:2.0174e-05)0.908:1.1742e-05,6755_4_5:3.3383e-05)0.993:3.5197e-05,(6949_2_7:0.000184924,6840_1_10:3.9475e-05)0.850:8.226e-06)0.973:1.8106e-05)0.732:3.508e-06)1.000:0.001560367)0.995:0.000106538)1.000:0.022322327,(6805_5_12:0.001221182,(6736_8_17:1.7498e-05,6807_1_24:2.0238e-05)1.000:0.000422878)1.000:0.009032964)1.000:0.005687916)0.999:0.006013094)1.000:0.008212567,((6938_6_13:0.017640534,(((6730_6_10:0.000156499,(6949_1_11:1.4708e-05,6983_5_9:1.1463e-05)1.000:7.5304e-05)1.000:0.000140034,7038_5_15:0.000229559)1.000:0.007902576,((((6649_7_18:1.7528e-05,(6730_5_12:3.329e-06,(6631_4_15:3.352e-06,6630_1_3:1.1686e-05)0.943:1.1722e-05)0.752:2.509e-06)1.000:0.003281965,((6753_1_18:0.000752224,((6710_8_19:3.8105e-05,((6731_2_16:2.3552e-05,(6714_8_16:1.3306e-05,6755_1_17:1.9541e-05)0.927:1.0008e-05)0.759:3.363e-06,(6630_3_11:3.335e-06,6714_8_14:7.479e-06)0.900:2.1684e-05)0.741:5.6596e-05)0.999:0.001185768,6823_4_6:5.1469e-05)1.000:0.00038806)1.000:0.001610506,((6736_7_11:6.768e-06,(6730_4_19:1.5387e-05,6730_8_16:9.781e-06)0.510:7.531e-06)1.000:0.000835924,(6823_1_13:3.454e-06,6823_4_13:1.0303e-05)1.000:0.000222447)1.000:0.000568786)1.000:0.005640864)1.000:0.001386947,(6649_8_24:4.959e-06,(6593_4_17:3.593e-06,6259_6_24:2.6659e-05)0.809:1.9101e-05)1.000:0.002061696)1.000:0.000785371,6631_4_4:0.002617176)1.000:0.005842829)1.000:0.006018087)1.000:0.007790777,((((6755_1_3:7.8251e-05,(6736_4_8:6e-09,(6755_4_1:1.6854e-05,6731_2_18:1.0184e-05)0.205:3.363e-06)0.926:2.0076e-05)1.000:0.00022434,(6949_3_1:1.6219e-05,(7038_8_43:1.4591e-05,7038_8_37:1.2218e-05)0.000:6e-09)0.999:0.000161689)1.000:0.000181739,(6925_6_18:1.5717e-05,6983_4_96:0.000393613)1.000:0.000192913)1.000:0.012423844,(6871_2_11:6.4447e-05,(((7011_4_16:4.586e-06,7004_5_6:4.43e-06)0.463:7.245e-06,((((6925_7_23:2.5976e-05,6949_3_5:6e-09)0.926:3.0065e-05,((((6830_3_11:0.000647552,6753_4_11:5.872e-06)0.997:0.000134256,((6983_6_26:1.4013e-05,7011_6_4:3.1222e-05)0.995:7.1221e-05,(6736_4_15:4.9801e-05,6899_6_15:2.2802e-05)0.934:5.1682e-05)0.998:0.000171022)0.999:0.000102055,6938_3_23:1.9686e-05)0.640:7.516e-06,6830_3_13:2.2915e-05)0.759:4.309e-06)0.756:5.996e-06,(7038_5_22:1.5653e-05,6899_7_22:1.5763e-05)0.940:2.1462e-05)0.975:1.9753e-05,(6972_3_14:6e-09,6983_4_76:9.217e-06)0.796:4.569e-06)0.817:6.094e-06)0.791:4.542e-06,6983_8_86:8.735e-06)0.753:1.3412e-05)1.000:0.013533898)1.000:0.013393862)1.000:0.007173625)1.000:0.016535801)1.000:0.004085032,((6925_7_22:0.005939882,(6871_1_5:0.000986161,(6736_7_4:0.000454095,(6731_5_14:3.0284e-05,6736_6_18:1.0172e-05)1.000:0.001206111)0.183:8.4343e-05)1.000:0.008441007)0.994:0.003208035,((7004_6_45:3.8997e-05,7011_6_19:2.2679e-05)1.000:0.003029196,6949_2_2:0.004314252)1.000:0.005559675)1.000:0.032246299)1.000:0.003944657)0.631:0.003806779,((7054_4_12:0.005923436,(7004_5_20:1.4936e-05,(7038_4_5:1.3656e-05,7038_7_22:1.4592e-05)0.760:8.338e-06)1.000:0.005004641)1.000:0.027278519,(6925_6_23:0.003389303,((((6983_3_68:1.0673e-05,7004_8_91:6.709e-06)1.000:0.000938701,(6755_2_7:0.001222789,(6807_1_4:2.0961e-05,6807_2_12:3.854e-06)1.000:0.000481)0.981:0.000191031)0.998:0.000366074,((6730_4_16:7.395e-06,6730_8_21:2.1106e-05)1.000:0.002677515,6755_6_12:0.001735794)0.834:9.4891e-05)0.993:0.000176908,((6938_6_21:1.1275e-05,(6972_5_10:6e-09,6972_5_13:1.5275e-05)0.880:1.4268e-05)1.000:0.002557175,((6830_3_1:1.3711e-05,6823_2_21:1.3987e-05)0.835:9.264e-06,(6805_6_24:1.6243e-05,6840_3_18:3.466e-06)0.778:4.158e-06)1.000:0.004365964)0.942:0.000271656)1.000:0.002385828)1.000:0.029706385)1.000:0.007685128)1.000:0.004288665,(((6925_8_9:0.000144331,(6753_2_18:1.1523e-05,6775_1_19:1.062e-05)1.000:0.000155866)1.000:0.019910978,(6641_6_18:0.000248089,(((6259_6_14:3.2563e-05,(6673_8_22:1.7831e-05,6641_6_23:7.776e-06)0.252:6e-09)0.861:8.194e-06,((6830_3_12:2.3132e-05,(6823_5_19:1.4386e-05,6823_7_23:2.1181e-05)0.106:8e-09)0.608:1.8716e-05,6899_6_2:4.469e-06)1.000:9.5347e-05)0.618:1.8812e-05,(6631_2_13:3.549e-06,6714_8_8:1.0637e-05)1.000:5.3452e-05)1.000:0.000183256)1.000:0.017590938)1.000:0.016251459,(((6259_8_8:2.0277e-05,(6925_5_6:1.5133e-05,6983_3_56:2.0348e-05)0.963:2.115e-05)0.000:6e-09,(((7054_5_2:3.666e-05,((7011_6_5:1.359e-05,7054_6_24:2.4783e-05)0.880:1.1462e-05,6983_2_23:2.7285e-05)0.871:1.0215e-05)0.915:1.0223e-05,6823_2_13:3.3196e-05)0.714:3.406e-06,(6630_3_21:1.4751e-05,(7092_6_3:5.72e-06,7092_6_4:8.067e-06)0.385:8.249e-06)0.978:2.2844e-05)0.916:6.85e-06)1.000:0.001803261,(6631_3_4:0.001123206,(6730_4_9:6.561e-06,6755_2_16:1.3116e-05)1.000:0.000400573)1.000:0.001357794)1.000:0.030355403)1.000:0.005162328)1.000:0.007493694,(6649_8_18:0.00010682,7038_5_7:8.6461e-05)1.000:0.03108455)1.000:0.033071462,((((7011_5_2:2.0474e-05,6938_6_19:8.67e-06)0.991:4.3018e-05,(6840_1_18:6.891e-06,((6805_3_3:2.1192e-05,(6972_3_15:8.063e-06,6938_5_19:3.4236e-05)0.871:7.62e-06)0.967:2.0697e-05,6949_4_23:3.0516e-05)0.585:4.8e-07)0.770:6.994e-06)0.762:4.075e-06,6983_8_87:1.707e-05)0.569:6.68e-07,6972_4_13:1.3227e-05)0.941:0.000725953)1.000:0.009891627,6972_2_2:6e-09)1.000;
