# Supplementary material for: Genome-wide identification of lineage and locus specific variation associated with pneumococcal carriage duration
Source: eLife journal article supplement (doi:10.7554/elife.26255), 2017-07-25
Supplement: supp [file elife-26255-supp-v1.zip › elife_poa_e26255_Figure_5_source_data_1.txt]

26	1	23	0.236394	1	1
26	2	83	0.265656	1	1
26	3	109	0.0363731	1	1
26	4	281	0.14083	1	1
26	5	293	0.561993	1	1
26	6	483	0.169076	1	1
26	7	539	0.0208649	1	1
26	8	554	0.027622	1	1
26	9	587	0.604734	1	1
26	10	617	0.0208649	1	1
26	11	845	0.128126	1	1
26	12	869	0.573532	1	1
26	13	926	0.179971	1	1
26	14	1022	0.44221	1	1
26	15	1064	0.137398	1	1
26	16	1301	1.15491	1	1
26	17	1471	3.5056	1	1
26	18	1541	0.452367	1	1
26	19	1565	0.0432218	1	1
26	20	1616	0.284469	1	1
26	21	1711	0.0851168	1	1
26	22	1755	0.1639	1	1
26	23	1804	0.0620795	1	1
26	24	1805	0.645813	1	1
26	25	1807	0.0620795	1	1
26	26	1825	0.357547	1	1
26	27	1832	0.441175	1	1
26	28	1981	1.30103	1	1
26	29	2159	0.419769	1	1
26	30	2275	0.0305879	1	1
26	31	2317	0.0103678	1	1
26	32	2340	0.467643	1	1
26	33	2366	2.62281	1	1
26	34	2374	0.0172682	1	1
26	35	2557	0.141592	1	1
26	36	2659	0.43885	1	1
26	37	2672	0.43885	1	1
26	38	2695	0.353791	1	1
26	39	2746	0.322368	1	1
26	40	2865	1.03604	1	1
26	41	2868	0.74614	1	1
26	42	2887	0.29697	1	1
26	43	2943	0.245029	1	1
26	44	2966	0.0605069	1	1
26	45	3074	0.202506	1	1
26	46	3083	0.43885	1	1
26	47	3125	0.441087	1	1
26	48	3133	0.128203	1	1
26	49	3236	0.637079	1	1
26	50	3292	0.353564	1	1
26	51	3370	0.148104	1	1
26	52	3397	0.0414264	1	1
26	53	3442	0.0572527	1	1
26	54	3490	0.123479	1	1
26	55	3520	0.00400248	1	1
26	56	3526	0.78934	1	1
26	57	3553	0.0854785	1	1
26	58	3574	0.20609	1	1
26	59	3577	0.0795652	1	1
26	60	3583	0.0226875	1	1
26	61	3586	0.0226875	1	1
26	62	3592	1.23541	1	1
26	63	3601	0.0165485	1	1
26	64	3604	1.12381	1	1
26	65	3616	0.115979	1	1
26	66	3619	0.0767885	1	1
26	67	3631	1.12381	1	1
26	68	3685	1.32969	1	1
26	69	3715	3.54767	1	1
26	70	3721	2.99222	1	1
26	71	3814	3.76064	1	1
26	72	3826	0.852135	1	1
26	73	3850	0.699205	1	1
26	74	3910	1.12381	1	1
26	75	3926	0.0267277	1	1
26	76	3952	3.54767	1	1
26	77	3965	0.395238	1	1
26	78	3982	2.21446	1	1
26	79	4057	0.567122	1	1
26	80	4112	0.353661	1	1
26	81	4114	0.176084	1	1
26	82	4153	0.0100958	1	1
26	83	4183	0.31631	1	1
26	84	4198	3.93111	1	1
26	85	4212	0.313823	1	1
26	86	4231	2.94977	1	1
26	87	4273	0.0578477	1	1
26	88	4392	0.386933	1	1
26	89	4455	3.35425	1	1
26	90	4517	0.568147	1	1
26	91	4551	3.50758	1	1
26	92	4554	3.36263	1	1
26	93	4565	1.15491	1	1
26	94	4566	3.72436	1	1
26	95	4590	3.72436	1	1
26	96	4605	3.54767	1	1
26	97	4629	3.54767	1	1
26	98	4638	3.72436	1	1
26	99	4740	3.54767	1	1
26	100	4749	0.276658	1	1
26	101	4809	3.54767	1	1
26	102	4839	0.019133	1	1
26	103	4861	1.66787	1	1
26	104	4873	0.121164	1	1
26	105	4887	0.423838	1	1
26	106	4908	0.236573	1	1
26	107	4963	0.53576	1	1
26	108	5000	0.125402	1	1
26	109	5055	0.0988553	1	1
26	110	5090	3.86358	1	1
26	111	5105	0.131223	1	1
26	112	5148	2.05022	1	1
26	113	5169	3.86358	1	1
26	114	5170	0.411825	1	1
26	115	5195	0.0572527	1	1
26	116	5226	3.86358	1	1
26	117	5235	3.86358	1	1
26	118	5253	0.0481681	1	1
26	119	5280	0.0481577	1	1
26	120	5306	0.0312735	1	1
26	121	5384	0.0839685	1	1
26	122	5426	0.0101859	1	1
26	123	5496	0.625658	1	1
26	124	5498	0.0808835	1	1
26	125	5594	0.274784	1	1
26	126	5604	3.3573	1	1
26	127	5655	3.61972	1	1
26	128	5657	3.02904	1	1
26	129	5703	3.54767	1	1
26	130	5713	3.54767	1	1
26	131	5715	0.186879	1	1
26	132	5739	0.159446	1	1
26	133	5745	0.159446	1	1
26	134	5750	3.54767	1	1
26	135	5755	3.54767	1	1
26	136	5757	3.54767	1	1
26	137	5760	0.640376	1	1
26	138	5829	1.02383	1	1
26	139	5877	0.477942	1	1
26	140	5889	0.500063	1	1
26	141	5906	0.217248	1	1
26	142	5953	3.32828	1	1
26	143	5960	2.82733	1	1
26	144	5964	2.82733	1	1
26	145	5980	0.170944	1	1
26	146	5988	3.14861	1	1
26	147	6000	0.0114553	1	1
26	148	6033	3.90644	1	1
26	149	6040	3.32828	1	1
26	150	6069	0.353109	1	1
26	151	6075	3.86358	1	1
26	152	6087	3.65389	1	1
26	153	6145	0.133701	1	1
26	154	6219	0.111136	1	1
26	155	6229	3.28767	1	1
26	156	6233	0.0276857	1	1
26	157	6234	3.49552	1	1
26	158	6255	0.15022	1	1
26	159	6348	0.111136	1	1
26	160	6405	0.0824445	1	1
26	161	6453	0.0371458	1	1
26	162	6459	1.59654	1	1
26	163	6485	0.241163	1	1
26	164	6486	3.81373	1	1
26	165	6492	3.86961	1	1
26	166	6495	1.25848	1	1
26	167	6502	1.58658	1	1
26	168	6513	0.920381	1	1
26	169	6525	3.28767	1	1
26	170	6540	0.0225306	1	1
26	171	6588	0.0944179	1	1
26	172	6593	0.183348	1	1
26	173	6618	2.55636	1	1
26	174	6675	3.81373	1	1
26	175	6693	3.65431	1	1
26	176	6734	0.0572527	1	1
26	177	6747	1.03888	1	1
26	178	6748	3.93019	1	1
26	179	6753	4.22093	1	1
26	180	6846	0.0116447	1	1
26	181	6847	0.163423	1	1
26	182	6909	3.28767	1	1
26	183	6916	0.517629	1	1
26	184	6937	3.19349	1	1
26	185	7015	0.875686	1	1
26	186	7058	4.29696	1	1
26	187	7081	1.03888	1	1
26	188	7083	0.21386	1	1
26	189	7200	4.29696	1	1
26	190	7236	0.387018	1	1
26	191	7296	0.385399	1	1
26	192	7329	0.396867	1	1
26	193	7373	0.0556186	1	1
26	194	7378	0.182027	1	1
26	195	7412	0.446838	1	1
26	196	7416	0.218385	1	1
26	197	7437	0.519422	1	1
26	198	7445	3.39541	1	1
26	199	7446	3.20502	1	1
26	200	7453	1.52095	1	1
26	201	7476	0.723591	1	1
26	202	7479	0.936108	1	1
26	203	7519	3.41175	1	1
26	204	7554	0.169437	1	1
26	205	7578	0.30858	1	1
26	206	7584	3.39541	1	1
26	207	7615	0.89144	1	1
26	208	7665	3.39541	1	1
26	209	7713	3.39541	1	1
26	210	7743	2.80149	1	1
26	211	7800	2.88057	1	1
26	212	7803	3.39541	1	1
26	213	7984	0.370834	1	1
26	214	7991	0.14892	1	1
26	215	8028	0.0940789	1	1
26	216	8035	0.777881	1	1
26	217	8151	0.754963	1	1
26	218	8169	0.288132	1	1
26	219	8177	0.623849	1	1
26	220	8198	0.0325077	1	1
26	221	8256	0.858131	1	1
26	222	8257	0.606582	1	1
26	223	8317	0.457525	1	1
26	224	8330	0.0870909	1	1
26	225	8355	0.114136	1	1
26	226	8368	0.464044	1	1
26	227	8389	0.79361	1	1
26	228	8429	0.119648	1	1
26	229	8437	0.823015	1	1
26	230	8444	0.14892	1	1
26	231	8470	1.40631	1	1
26	232	8621	0.14892	1	1
26	233	8676	0.156908	1	1
26	234	8730	0.316728	1	1
26	235	8839	0.14892	1	1
26	236	8872	0.513029	1	1
26	237	8874	0.841884	1	1
26	238	8923	0.0201742	1	1
26	239	9016	0.184737	1	1
26	240	9058	0.0568336	1	1
26	241	9177	0.775693	1	1
26	242	9195	0.772278	1	1
26	243	9283	0.0952287	1	1
26	244	9299	0.053871	1	1
26	245	9333	0.333595	1	1
26	246	9379	2.71162	1	1
26	247	9428	0.14892	1	1
26	248	9460	0.111335	1	1
26	249	9469	0.626791	1	1
26	250	9485	0.938744	1	1
26	251	9525	0.520783	1	1
26	252	9620	0.421489	1	1
26	253	9714	0.724062	1	1
26	254	9774	0.0659459	1	1
26	255	9945	0.767135	1	1
26	256	10203	1.27617	1	1
26	257	10234	0.053871	1	1
26	258	10257	0.418302	1	1
26	259	10269	0.053871	1	1
26	260	10275	0.223493	1	1
26	261	10340	0.418302	1	1
26	262	10368	0.418302	1	1
26	263	10371	0.418302	1	1
26	264	10389	0.139258	1	1
26	265	10398	0.139258	1	1
26	266	10419	0.290485	1	1
26	267	10428	0.139258	1	1
26	268	10462	0.112937	1	1
26	269	10482	0.0957303	1	1
26	270	10489	0.139258	1	1
26	271	10495	0.182803	1	1
26	272	10530	0.351509	1	1
26	273	10531	0.370933	1	1
26	274	10553	0.0425676	1	1
26	275	10616	0.579509	1	1
26	276	10639	0.13141	1	1
26	277	10673	0.050591	1	1
26	278	10676	1.1642	1	1
26	279	10749	0.352022	1	1
26	280	10754	0.362099	1	1
26	281	10838	0.379046	1	1
26	282	10861	0.863329	1	1
26	283	10907	0.138141	1	1
26	284	11090	1.19855	1	1
26	285	11103	0.417238	1	1
26	286	11133	1.40434	1	1
26	287	11150	0.192284	1	1
26	288	11205	0.256671	1	1
26	289	11214	0.461232	1	1
26	290	11307	0.192724	1	1
26	291	11341	0.1427	1	1
26	292	11415	0.0583051	1	1
26	293	11439	1.21484	1	1
26	294	11451	1.32878	1	1
26	295	11477	0.38169	1	1
26	296	11501	0.172457	1	1
26	297	11527	0.121595	1	1
26	298	11559	0.0701387	1	1
26	299	11565	0.131507	1	1
26	300	11601	0.146156	1	1
26	301	11633	0.0645176	1	1
26	302	11671	0.318801	1	1
26	303	11673	0.559137	1	1
26	304	11769	0.0901977	1	1
26	305	11891	0.369398	1	1
26	306	11959	0.10494	1	1
26	307	12011	0.568147	1	1
26	308	12102	0.10494	1	1
26	309	12150	0.14892	1	1
26	310	12151	0.246294	1	1
26	311	12162	0.106339	1	1
26	312	12233	0.0185668	1	1
26	313	12314	0.467643	1	1
26	314	12353	0.11204	1	1
26	315	12485	0.219303	1	1
26	316	12560	0.373711	1	1
26	317	12590	0.10494	1	1
26	318	12604	0.0133739	1	1
26	319	12669	0.0583901	1	1
26	320	12756	0.373711	1	1
26	321	12768	0.373711	1	1
26	322	12807	0.00181384	1	1
26	323	12938	0.609847	1	1
26	324	13058	0.522946	1	1
26	325	13250	0.559806	1	1
26	326	13376	0.413588	1	1
26	327	13424	0.241013	1	1
26	328	13475	0.0319584	1	1
26	329	13667	0.10494	1	1
26	330	13701	0.818089	1	1
26	331	13820	0.0372704	1	1
26	332	13845	0.180084	1	1
26	333	13862	0.0155659	1	1
26	334	13916	0.144154	1	1
26	335	13958	0.0516091	1	1
26	336	13994	0.874855	1	1
26	337	14031	0.296097	1	1
26	338	14044	0.326834	1	1
26	339	14045	0.0372704	1	1
26	340	14162	0.038422	1	1
26	341	14319	0.116481	1	1
26	342	14336	0.187458	1	1
26	343	14337	0.063854	1	1
26	344	21649	1.09263	1	1
26	345	21729	0.204212	1	1
26	346	21732	0.143652	1	1
26	347	21759	0.296606	1	1
26	348	21781	2.06727	1	1
26	349	21791	0.808211	1	1
26	350	21800	0.238272	1	1
26	351	21801	0.45009	1	1
26	352	21804	0.716291	1	1
26	353	21810	0.988351	1	1
26	354	22507	0.259848	1	1
26	355	22597	0.314396	1	1
26	356	22630	0.0237893	1	1
26	357	22636	2.07785	1	1
26	358	22647	0.17047	1	1
26	359	22650	0.258361	1	1
26	360	22659	0.0239064	1	1
26	361	22662	0.71921	1	1
26	362	22665	1.52556	1	1
26	363	22708	0.737407	1	1
26	364	22738	0.83044	1	1
26	365	22740	0.309498	1	1
26	366	22744	0.141456	1	1
26	367	22746	0.100648	1	1
26	368	22747	0.0261197	1	1
26	369	22813	0.344462	1	1
26	370	22878	0.536351	1	1
26	371	22886	0.0868922	1	1
26	372	22889	0.756585	1	1
26	373	22892	0.338909	1	1
26	374	22921	0.997899	1	1
26	375	22931	0.150911	1	1
26	376	22945	0.33481	1	1
26	377	22954	0.1819	1	1
26	378	22980	0.266971	1	1
26	379	23004	0.344825	1	1
26	380	23080	0.301102	1	1
26	381	23092	0.184423	1	1
26	382	23095	0.755225	1	1
26	383	23101	0.475786	1	1
26	384	23120	0.0112445	1	1
26	385	23133	0.0365222	1	1
26	386	23138	0.155537	1	1
26	387	23139	0.251567	1	1
26	388	23153	0.573156	1	1
26	389	23154	0.756983	1	1
26	390	23178	1.27605	1	1
26	391	23181	0.14892	1	1
26	392	23189	0.176822	1	1
26	393	23190	0.232968	1	1
26	394	23211	0.42825	1	1
26	395	23218	0.405474	1	1
26	396	23227	0.13233	1	1
26	397	23238	0.0944552	1	1
26	398	23239	0.910835	1	1
26	399	23305	0.353965	1	1
26	400	23334	0.0325077	1	1
26	401	23349	0.435057	1	1
26	402	23350	0.310897	1	1
26	403	23363	0.0607068	1	1
26	404	23370	0.469053	1	1
26	405	23377	0.272527	1	1
26	406	23383	0.75288	1	1
26	407	23387	0.846136	1	1
26	408	23391	0.773643	1	1
26	409	23402	0.441902	1	1
26	410	23408	0.0715814	1	1
26	411	23413	1.16856	1	1
26	412	23417	0.671727	1	1
26	413	23423	0.363643	1	1
26	414	23447	0.185796	1	1
26	415	23453	0.48307	1	1
26	416	23455	0.0465984	1	1
26	417	23458	0.698292	1	1
26	418	23468	0.746301	1	1
26	419	23471	0.0525245	1	1
26	420	23483	0.353351	1	1
26	421	23486	1.56389	1	1
26	422	23489	1.5426	1	1
26	423	23491	0.10803	1	1
26	424	23492	0.568086	1	1
26	425	23501	0.115825	1	1
26	426	23503	0.323153	1	1
26	427	23551	0.472516	1	1
26	428	23558	0.183898	1	1
26	429	23572	0.015082	1	1
26	430	23618	0.28055	1	1
26	431	23622	0.200166	1	1
26	432	23623	0.0809721	1	1
26	433	23639	0.2703	1	1
26	434	23656	0.103767	1	1
26	435	23688	0.123045	1	1
26	436	23718	0.171607	1	1
26	437	23752	0.0872583	1	1
26	438	23805	0.595924	1	1
26	439	23906	0.328529	1	1
26	440	23926	0.145653	1	1
26	441	23929	0.296868	1	1
26	442	23939	0.130647	1	1
26	443	23999	0.0671145	1	1
26	444	24025	0.14892	1	1
26	445	24056	0.0895374	1	1
26	446	24063	0.119632	1	1
26	447	24241	0.199207	1	1
26	448	24331	0.151286	1	1
26	449	24409	0.329043	1	1
26	450	24622	0.0739112	1	1
26	451	24780	0.14892	1	1
26	452	24931	0.171281	1	1
26	453	24994	0.0685712	1	1
26	454	25001	1.14366	1	1
26	455	25003	0.137935	1	1
26	456	25129	0.437354	1	1
26	457	25270	0.263535	1	1
26	458	25327	0.0437723	1	1
26	459	25363	0.115907	1	1
26	460	25388	0.0446023	1	1
26	461	25392	0.379611	1	1
26	462	25527	0.296915	1	1
26	463	25574	0.80156	1	1
26	464	25577	0.959393	1	1
26	465	25672	1.12581	1	1
26	466	25743	0.280362	1	1
26	467	25806	0.605679	1	1
26	468	25808	0.435057	1	1
26	469	25855	0.217248	1	1
26	470	25939	1.64727	1	1
26	471	25967	0.0604336	1	1
26	472	26007	0.408836	1	1
26	473	26025	0.107918	1	1
26	474	26069	0.226309	1	1
26	475	26076	0.0656545	1	1
26	476	26086	0.161194	1	1
26	477	26109	0.0656545	1	1
26	478	26112	0.0656545	1	1
26	479	26121	0.00238402	1	1
26	480	26132	0.0554781	1	1
26	481	26133	0.0554781	1	1
26	482	26149	0.154883	1	1
26	483	26154	0.000388461	1	1
26	484	26163	0.398328	1	1
26	485	26172	0.423881	1	1
26	486	26320	0.953491	1	1
26	487	26323	0.218818	1	1
26	488	26324	0.748223	1	1
26	489	26326	0.373377	1	1
26	490	26343	0.359154	1	1
26	491	26357	0.359154	1	1
26	492	26394	0.188261	1	1
26	493	26395	0.187794	1	1
26	494	26404	0.214847	1	1
26	495	26411	0.282947	1	1
26	496	26413	0.282947	1	1
26	497	26417	0.282947	1	1
26	498	26423	0.437167	1	1
26	499	26432	0.437167	1	1
26	500	26462	0.358321	1	1
26	501	26465	1.20301	1	1
26	502	26468	0.358321	1	1
26	503	26504	0.358321	1	1
26	504	26513	0.358321	1	1
26	505	26540	0.29126	1	1
26	506	26628	0.324994	1	1
26	507	26641	0.324994	1	1
26	508	26698	0.147409	1	1
26	509	26735	0.747399	1	1
26	510	26834	0.588087	1	1
26	511	26866	0.588087	1	1
26	512	27116	0.234937	1	1
26	513	27143	0.414141	1	1
26	514	27277	0.59055	1	1
26	515	27286	0.320402	1	1
26	516	27289	0.193537	1	1
26	517	27292	0.371523	1	1
26	518	27298	0.371523	1	1
26	519	27304	0.339475	1	1
26	520	27307	0.371523	1	1
26	521	27310	0.286734	1	1
26	522	27322	0.200751	1	1
26	523	27334	0.760081	1	1
26	524	27366	1.77229	1	1
26	525	27382	0.0446589	1	1
26	526	27388	0.48435	1	1
26	527	27394	0.48435	1	1
26	528	27403	0.48435	1	1
26	529	27406	0.48435	1	1
26	530	27409	0.0914189	1	1
26	531	27411	0.121964	1	1
26	532	27412	0.0914189	1	1
26	533	27415	0.0264567	1	1
26	534	27418	0.119418	1	1
26	535	27421	0.00893509	1	1
26	536	27439	0.854642	1	1
26	537	27448	0.00495091	1	1
26	538	27457	0.801253	1	1
26	539	27466	1.52833	1	1
26	540	27499	1.05345	1	1
26	541	27504	0.427784	1	1
26	542	27512	0.1801	1	1
26	543	27518	0.155028	1	1
26	544	27520	0.195768	1	1
26	545	27526	0.147263	1	1
26	546	27532	0.137097	1	1
26	547	27552	0.788797	1	1
26	548	27553	0.538318	1	1
26	549	27571	1.00301	1	1
26	550	27590	0.390243	1	1
26	551	27712	0.00290208	1	1
26	552	27751	0.00290208	1	1
26	553	27781	0.00290208	1	1
26	554	27814	0.00290208	1	1
26	555	27824	0.00290208	1	1
26	556	27877	0.00290208	1	1
26	557	27895	0.0399574	1	1
26	558	27900	0.0399574	1	1
26	559	27909	0.0399574	1	1
26	560	27915	0.0399574	1	1
26	561	27946	0.00290208	1	1
26	562	27993	0.0399574	1	1
26	563	27994	0.0399574	1	1
26	564	28015	0.0399574	1	1
26	565	28024	0.00290208	1	1
26	566	28027	0.00290208	1	1
26	567	28066	0.00290208	1	1
26	568	28081	0.00290208	1	1
26	569	28084	0.00290208	1	1
26	570	28111	0.00290208	1	1
26	571	28114	0.00290208	1	1
26	572	28225	0.00290208	1	1
26	573	28297	0.00290208	1	1
26	574	28414	0.0399574	1	1
26	575	28510	0.162896	1	1
26	576	28513	0.162896	1	1
26	577	28528	0.00290208	1	1
26	578	28531	0.00290208	1	1
26	579	28564	0.0399574	1	1
26	580	28582	0.0399574	1	1
26	581	28591	0.0399574	1	1
26	582	28600	0.0399574	1	1
26	583	28691	0.0527942	1	1
26	584	28692	0.313545	1	1
26	585	28705	0.0296011	1	1
26	586	28706	1.10572	1	1
26	587	28709	0.0405687	1	1
26	588	28712	0.56333	1	1
26	589	28715	0.264779	1	1
26	590	28718	0.600344	1	1
26	591	28721	0.615192	1	1
26	592	28729	0.0100363	1	1
26	593	28736	0.386907	1	1
26	594	28739	0.0319716	1	1
26	595	28741	1.70614	1	1
26	596	28742	0.168991	1	1
26	597	28748	0.121197	1	1
26	598	28757	1.05814	1	1
26	599	28760	0.757994	1	1
26	600	28775	1.58345	1	1
26	601	28788	1.867	1	1
26	602	28796	0.345317	1	1
26	603	28799	0.126738	1	1
26	604	28803	0.260395	1	1
26	605	28810	0.82452	1	1
26	606	28811	0.802422	1	1
26	607	28841	0.14892	1	1
26	608	28852	0.138953	1	1
26	609	28865	0.0597535	1	1
26	610	28867	0.954808	1	1
26	611	28868	0.118423	1	1
26	612	28871	0.0791296	1	1
26	613	28877	0.870509	1	1
26	614	28882	0.400004	1	1
26	615	28883	0.404489	1	1
26	616	28889	0.404489	1	1
26	617	28890	0.14892	1	1
26	618	28895	1.15848	1	1
26	619	28898	0.404489	1	1
26	620	28901	0.267804	1	1
26	621	28910	0.894529	1	1
26	622	28948	0.613184	1	1
26	623	28949	0.613184	1	1
26	624	28970	0.647248	1	1
26	625	29001	0.647248	1	1
26	626	29033	0.613184	1	1
26	627	29082	2.51353	1	1
26	628	29093	0.647248	1	1
26	629	29096	2.51353	1	1
26	630	29114	0.14892	1	1
26	631	29117	0.14892	1	1
26	632	29125	0.14892	1	1
26	633	29165	0.14892	1	1
26	634	29170	0.14892	1	1
26	635	29172	0.14892	1	1
26	636	29174	0.14892	1	1
26	637	29179	0.14892	1	1
26	638	29186	0.14892	1	1
26	639	29197	0.14892	1	1
26	640	29198	0.14892	1	1
26	641	29204	0.14892	1	1
26	642	29205	0.0801882	1	1
26	643	29408	1.92544	1	1
26	644	29472	0.14892	1	1
26	645	29477	0.936836	1	1
26	646	29503	0.93907	1	1
26	647	29525	0.613184	1	1
26	648	29539	0.647248	1	1
26	649	29548	0.60816	1	1
26	650	29563	0.93907	1	1
26	651	29569	0.93907	1	1
26	652	29625	0.647248	1	1
26	653	29658	0.655465	1	1
26	654	29712	0.613184	1	1
26	655	29721	0.647248	1	1
26	656	29739	0.133425	1	1
26	657	29742	2.92921	1	1
26	658	29748	0.103836	1	1
26	659	29751	0.542698	1	1
26	660	29757	0.43003	1	1
26	661	29760	0.30673	1	1
26	662	29763	0.340248	1	1
26	663	29766	0.859892	1	1
26	664	29769	0.104004	1	1
26	665	29771	0.306817	1	1
26	666	29772	0.306817	1	1
26	667	29775	0.417077	1	1
26	668	29778	0.381534	1	1
26	669	29779	1.36169	1	1
26	670	29780	1.37004	1	1
26	671	29784	1.44388	1	1
26	672	29787	1.64723	1	1
26	673	29790	1.48356	1	1
26	674	29793	1.11922	1	1
26	675	29798	1.61989	1	1
26	676	29802	1.3925	1	1
26	677	29913	0.0265664	1	1
26	678	29916	0.667733	1	1
26	679	29918	1.53226	1	1
26	680	29925	0.0125906	1	1
26	681	29934	1.30059	1	1
26	682	29935	2.71853	1	1
26	683	29936	0.0199389	1	1
26	684	29937	0.0868861	1	1
26	685	29938	0.0443287	1	1
26	686	29939	0.0443287	1	1
26	687	29940	0.0580399	1	1
26	688	29941	0.698035	1	1
26	689	29942	0.0609753	1	1
26	690	29951	0.682281	1	1
26	691	29953	0.806906	1	1
26	692	29954	0.796929	1	1
26	693	29959	0.0577754	1	1
26	694	29970	0.141691	1	1
26	695	29971	0.459684	1	1
26	696	29974	0.212315	1	1
26	697	29977	1.67488	1	1
26	698	29983	0.309409	1	1
26	699	29988	0.0817345	1	1
26	700	30117	0.534488	1	1
26	701	30124	0.120754	1	1
26	702	30222	0.436427	1	1
26	703	30225	0.233325	1	1
26	704	30229	0.182307	1	1
26	705	30230	0.141875	1	1
26	706	30240	0.2416	1	1
26	707	30241	0.135226	1	1
26	708	30242	0.179528	1	1
26	709	30243	0.132056	1	1
26	710	30244	0.778831	1	1
26	711	30250	0.0646941	1	1
26	712	30254	0.0646941	1	1
26	713	30255	0.0646941	1	1
26	714	30261	0.0646941	1	1
26	715	30265	0.0646941	1	1
26	716	30266	0.0646941	1	1
26	717	30269	0.0646941	1	1
26	718	30270	0.0646941	1	1
26	719	30290	0.821428	1	1
26	720	30297	0.947771	1	1
26	721	30311	1.59583	1	1
26	722	30313	1.13288	1	1
26	723	30315	1.75033	1	1
26	724	30341	1.5284	1	1
26	725	30458	0.538603	1	1
26	726	30459	0.16191	1	1
26	727	30463	0.0527735	1	1
26	728	30474	0.0623526	1	1
26	729	30475	0.0427363	1	1
26	730	30477	0.00473664	1	1
26	731	30478	0.113962	1	1
26	732	30499	0.593316	1	1
26	733	30531	0.628191	1	1
26	734	30733	0.14892	1	1
26	735	30744	0.374553	1	1
26	736	30763	1.48055	1	1
26	737	30764	1.40559	1	1
26	738	30779	0.274825	1	1
26	739	30781	0.0547589	1	1
26	740	30784	0.265581	1	1
26	741	30790	0.162278	1	1
26	742	30799	0.720892	1	1
26	743	30802	0.119038	1	1
26	744	30805	0.184016	1	1
26	745	30811	0.118538	1	1
26	746	30812	0.064927	1	1
26	747	30815	0.0465601	1	1
26	748	30826	0.123295	1	1
26	749	30839	1.14629	1	1
26	750	30840	0.394025	1	1
26	751	30855	0.490413	1	1
26	752	30876	0.420133	1	1
26	753	31114	0.14892	1	1
26	754	31301	1.32778	1	1
26	755	31336	0.470162	1	1
26	756	31374	1.24575	1	1
26	757	31425	0.230978	1	1
26	758	31440	0.0357976	1	1
26	759	31443	0.148764	1	1
26	760	31455	1.43354	1	1
26	761	31459	1.59788	1	1
26	762	31461	1.5004	1	1
26	763	31467	0.545389	1	1
26	764	31488	1.726	1	1
26	765	31503	0.0313805	1	1
26	766	31515	0.93973	1	1
26	767	31518	1.30133	1	1
26	768	31530	2.43092	1	1
26	769	31533	0.631304	1	1
26	770	31536	2.94924	1	1
26	771	31537	2.79016	1	1
26	772	31545	0.937131	1	1
26	773	31548	1.89395	1	1
26	774	31560	0.727444	1	1
26	775	31587	0.0267339	1	1
26	776	31588	0.251009	1	1
26	777	31596	0.486813	1	1
26	778	31599	0.341566	1	1
26	779	31605	0.036911	1	1
26	780	31686	0.269276	1	1
26	781	31703	0.393111	1	1
26	782	31719	1.06242	1	1
26	783	31726	0.5508	1	1
26	784	31727	0.744378	1	1
26	785	31729	0.744378	1	1
26	786	31732	0.375573	1	1
26	787	31733	0.114776	1	1
26	788	31734	0.134846	1	1
26	789	31745	1.20368	1	1
26	790	31758	0.498581	1	1
26	791	31761	0.502582	1	1
26	792	31763	0.499583	1	1
26	793	31778	0.549023	1	1
26	794	31840	1.65296	1	1
26	795	31858	1.39665	1	1
26	796	31894	1.39639	1	1
26	797	31897	1.39639	1	1
26	798	31906	1.45398	1	1
26	799	31909	1.33482	1	1
26	800	31915	1.45398	1	1
26	801	31930	1.71152	1	1
26	802	31987	1.10898	1	1
26	803	32028	1.1324	1	1
26	804	32037	1.36955	1	1
26	805	32038	1.16356	1	1
26	806	32045	1.00431	1	1
26	807	32060	1.29838	1	1
26	808	32086	0.128298	1	1
26	809	32087	0.111403	1	1
26	810	32088	1.05975	1	1
26	811	32114	1.799	1	1
26	812	32123	0.258344	1	1
26	813	32134	0.32029	1	1
26	814	32135	0.148827	1	1
26	815	32153	1.98619	1	1
26	816	32156	0.681414	1	1
26	817	32169	1.35765	1	1
26	818	32186	0.140375	1	1
26	819	32199	1.5747	1	1
26	820	32200	1.5747	1	1
26	821	32230	1.63125	1	1
26	822	32248	0.121646	1	1
26	823	32254	0.210717	1	1
26	824	32263	0.154548	1	1
26	825	32275	1.40416	1	1
26	826	32284	0.211569	1	1
26	827	32290	0.136968	1	1
26	828	32296	0.180957	1	1
26	829	32305	0.316719	1	1
26	830	32314	0.171335	1	1
26	831	32335	0.978896	1	1
26	832	32339	0.186233	1	1
26	833	32345	0.133617	1	1
26	834	32379	0.270831	1	1
26	835	32380	0.10764	1	1
26	836	32385	0.203716	1	1
26	837	32398	0.57298	1	1
26	838	32415	0.124441	1	1
26	839	32416	0.124441	1	1
26	840	32635	0.131638	1	1
26	841	32638	0.125291	1	1
26	842	32668	0.132449	1	1
26	843	32670	0.285588	1	1
26	844	32753	0.267151	1	1
26	845	32782	0.0184613	1	1
26	846	32896	1.61764	1	1
26	847	32937	0.103068	1	1
26	848	32959	0.0739636	1	1
26	849	32972	0.0263312	1	1
26	850	32986	0.678016	1	1
26	851	33011	0.174756	1	1
26	852	33029	0.254504	1	1
26	853	33037	0.915186	1	1
26	854	33042	0.50739	1	1
26	855	33107	0.174756	1	1
26	856	33142	0.553622	1	1
26	857	33148	0.174756	1	1
26	858	33149	0.174756	1	1
26	859	33182	0.135726	1	1
26	860	33199	0.0262332	1	1
26	861	33200	0.180789	1	1
26	862	33217	0.387507	1	1
26	863	33260	0.0825113	1	1
26	864	33261	0.0282653	1	1
26	865	33278	0.249884	1	1
26	866	33303	0.501823	1	1
26	867	33304	0.221638	1	1
26	868	33306	0.611274	1	1
26	869	33309	0.144254	1	1
26	870	33333	0.447231	1	1
26	871	33346	0.467643	1	1
26	872	33403	0.0282653	1	1
26	873	33411	0.142122	1	1
26	874	33413	0.20692	1	1
26	875	33471	0.138635	1	1
26	876	33610	0.420345	1	1
26	877	33632	0.10365	1	1
26	878	33639	0.298921	1	1
26	879	33681	0.26023	1	1
26	880	33714	0.420345	1	1
26	881	33721	0.0102676	1	1
26	882	33732	0.563504	1	1
26	883	33735	0.237603	1	1
26	884	33738	0.203824	1	1
26	885	33759	0.0976358	1	1
26	886	33774	0.0774417	1	1
26	887	33780	0.0774417	1	1
26	888	33789	0.281463	1	1
26	889	33790	0.179858	1	1
26	890	33804	0.270803	1	1
26	891	33861	0.0742356	1	1
26	892	33867	0.553622	1	1
26	893	33888	0.0815355	1	1
26	894	33912	0.167761	1	1
26	895	33921	0.81044	1	1
26	896	33939	0.0102676	1	1
26	897	33946	0.0102676	1	1
26	898	33951	0.26023	1	1
26	899	33957	0.0102676	1	1
26	900	33960	0.26023	1	1
26	901	33963	0.263685	1	1
26	902	33969	0.0102676	1	1
26	903	33973	0.291773	1	1
26	904	33981	0.0102676	1	1
26	905	33984	0.0109485	1	1
26	906	33993	0.335498	1	1
26	907	34008	0.0102676	1	1
26	908	34023	0.513343	1	1
26	909	34038	0.334366	1	1
26	910	34047	0.0102676	1	1
26	911	34089	0.0102676	1	1
26	912	34092	0.0445715	1	1
26	913	34098	0.142982	1	1
26	914	34101	0.428123	1	1
26	915	34107	0.26023	1	1
26	916	34110	0.210328	1	1
26	917	34113	0.0175286	1	1
26	918	34114	1.4015	1	1
26	919	34122	0.589766	1	1
26	920	34128	0.116202	1	1
26	921	34137	0.589766	1	1
26	922	34158	0.0920362	1	1
26	923	34182	1.51846	1	1
26	924	34188	0.518856	1	1
26	925	34194	0.518856	1	1
26	926	34200	0.26023	1	1
26	927	34215	0.653458	1	1
26	928	34227	0.167761	1	1
26	929	34230	0.167761	1	1
26	930	34260	0.671143	1	1
26	931	34263	0.398521	1	1
26	932	34266	0.398521	1	1
26	933	34278	0.173205	1	1
26	934	34308	0.48729	1	1
26	935	34332	0.200532	1	1
26	936	34338	0.671143	1	1
26	937	34350	0.173205	1	1
26	938	34368	0.671143	1	1
26	939	34377	0.0765078	1	1
26	940	34380	0.175654	1	1
26	941	34383	0.165943	1	1
26	942	34389	0.167761	1	1
26	943	34434	0.278068	1	1
26	944	34473	0.671143	1	1
26	945	34476	0.137339	1	1
26	946	34485	0.58312	1	1
26	947	34488	0.671143	1	1
26	948	34497	0.671143	1	1
26	949	34530	0.562409	1	1
26	950	34545	0.366775	1	1
26	951	34569	0.112818	1	1
26	952	34578	0.15246	1	1
26	953	34599	0.16489	1	1
26	954	34608	0.271283	1	1
26	955	34609	0.271283	1	1
26	956	34632	0.772819	1	1
26	957	34641	0.343275	1	1
26	958	34683	0.4701	1	1
26	959	34689	0.353831	1	1
26	960	34707	0.755428	1	1
26	961	34710	0.0901239	1	1
26	962	34719	0.4701	1	1
26	963	34746	0.550974	1	1
26	964	34758	0.290614	1	1
26	965	34761	0.311808	1	1
26	966	34785	0.289589	1	1
26	967	34800	0.290614	1	1
26	968	34815	0.0348064	1	1
26	969	34827	0.368585	1	1
26	970	34846	0.873452	1	1
26	971	34881	0.156411	1	1
26	972	34882	0.755069	1	1
26	973	34884	0.156411	1	1
26	974	34890	0.156411	1	1
26	975	34899	0.156411	1	1
26	976	34907	0.598317	1	1
26	977	34911	0.251357	1	1
26	978	34926	0.15819	1	1
26	979	34932	0.0420812	1	1
26	980	34936	0.0553632	1	1
26	981	34938	0.215918	1	1
26	982	34941	0.156411	1	1
26	983	34953	1.22489	1	1
26	984	34965	0.156411	1	1
26	985	34987	0.200029	1	1
26	986	35076	0.645337	1	1
26	987	35127	1.37028	1	1
26	988	35133	1.47127	1	1
26	989	35142	0.636079	1	1
26	990	35163	0.971186	1	1
26	991	35167	1.02978	1	1
26	992	35178	0.288655	1	1
26	993	35187	0.392478	1	1
26	994	35190	0.469728	1	1
26	995	35214	0.579258	1	1
26	996	35244	0.378537	1	1
26	997	35247	0.439125	1	1
26	998	35259	0.439125	1	1
26	999	35274	0.0409281	1	1
26	1000	35295	0.202326	1	1
26	1001	35304	0.252195	1	1
26	1002	35305	0.156411	1	1
26	1003	35310	0.202326	1	1
26	1004	35345	0.0303949	1	1
26	1005	35346	0.156066	1	1
26	1006	35362	0.0989976	1	1
26	1007	35364	0.170578	1	1
26	1008	35367	0.206737	1	1
26	1009	35370	0.176181	1	1
26	1010	35374	0.0212222	1	1
26	1011	35376	0.206737	1	1
26	1012	35382	0.195363	1	1
26	1013	35386	0.156411	1	1
26	1014	35400	0.125337	1	1
26	1015	35424	0.0303949	1	1
26	1016	35433	0.124945	1	1
26	1017	35436	0.0132467	1	1
26	1018	35446	0.156411	1	1
26	1019	35460	0.156411	1	1
26	1020	35464	0.16036	1	1
26	1021	35499	0.761661	1	1
26	1022	35506	0.119955	1	1
26	1023	35511	0.116622	1	1
26	1024	35527	0.191845	1	1
26	1025	35532	0.105749	1	1
26	1026	35541	0.0860814	1	1
26	1027	35546	0.181362	1	1
26	1028	35547	0.628007	1	1
26	1029	35548	0.181362	1	1
26	1030	35577	0.873452	1	1
26	1031	35579	0.0902263	1	1
26	1032	35649	0.0842688	1	1
26	1033	35657	0.0902263	1	1
26	1034	35664	0.199814	1	1
26	1035	35733	0.0842688	1	1
26	1036	35736	0.0687526	1	1
26	1037	35741	0.892128	1	1
26	1038	35755	1.09891	1	1
26	1039	35772	0.201159	1	1
26	1040	35774	0.106775	1	1
26	1041	35775	0.106775	1	1
26	1042	35781	0.0126938	1	1
26	1043	35782	0.106775	1	1
26	1044	35796	0.106775	1	1
26	1045	35809	0.212985	1	1
26	1046	35810	0.354399	1	1
26	1047	35822	0.254392	1	1
26	1048	35826	0.258184	1	1
26	1049	35832	0.342632	1	1
26	1050	35838	0.342393	1	1
26	1051	35844	0.28598	1	1
26	1052	35859	0.273123	1	1
26	1053	35861	0.199814	1	1
26	1054	35878	0.224014	1	1
26	1055	35880	0.199814	1	1
26	1056	35904	0.159678	1	1
26	1057	35928	0.199814	1	1
26	1058	35929	0.209323	1	1
26	1059	35940	0.0913815	1	1
26	1060	35990	0.225917	1	1
26	1061	35994	0.0715406	1	1
26	1062	36012	0.0150513	1	1
26	1063	36037	0.335379	1	1
26	1064	36043	0.637692	1	1
26	1065	36056	0.360797	1	1
26	1066	36081	0.119967	1	1
26	1067	36122	0.125258	1	1
26	1068	36146	0.0441973	1	1
26	1069	36191	0.0423702	1	1
26	1070	36192	0.0486192	1	1
26	1071	36216	0.226064	1	1
26	1072	36241	0.0853618	1	1
26	1073	36244	0.0347066	1	1
26	1074	36250	0.0040868	1	1
26	1075	36303	0.0322206	1	1
26	1076	36318	0.529841	1	1
26	1077	36383	0.076338	1	1
26	1078	36464	0.05075	1	1
26	1079	36468	0.517629	1	1
26	1080	36472	0.198996	1	1
26	1081	36473	0.0890365	1	1
26	1082	36486	0.24316	1	1
26	1083	36520	0.2859	1	1
26	1084	36559	0.328395	1	1
26	1085	36560	0.14892	1	1
26	1086	36668	0.360795	1	1
26	1087	36751	0.0759445	1	1
26	1088	36916	0.49238	1	1
26	1089	36952	0.342762	1	1
26	1090	36973	0.0543947	1	1
26	1091	37006	0.0770559	1	1
26	1092	37012	0.549503	1	1
26	1093	37063	0.0440272	1	1
26	1094	37090	0.369093	1	1
26	1095	37236	0.0556186	1	1
26	1096	37337	0.254392	1	1
26	1097	37339	0.120588	1	1
26	1098	37518	0.0295317	1	1
26	1099	37575	0.721675	1	1
26	1100	37589	0.135855	1	1
26	1101	37599	0.245653	1	1
26	1102	37601	0.348645	1	1
26	1103	37603	0.245653	1	1
26	1104	37606	0.512891	1	1
26	1105	37612	0.389323	1	1
26	1106	37615	0.761278	1	1
26	1107	37621	1.12493	1	1
26	1108	37625	0.319352	1	1
26	1109	37627	0.358144	1	1
26	1110	37639	0.30141	1	1
26	1111	37642	0.173772	1	1
26	1112	37648	0.42075	1	1
26	1113	37657	0.0595713	1	1
26	1114	37672	0.0207666	1	1
26	1115	37687	0.413462	1	1
26	1116	37690	0.476147	1	1
26	1117	37696	0.327129	1	1
26	1118	37697	0.300832	1	1
26	1119	37708	0.0604805	1	1
26	1120	37720	0.164781	1	1
26	1121	37724	0.0204834	1	1
26	1122	37750	0.325743	1	1
26	1123	37756	0.154542	1	1
26	1124	37758	0.569488	1	1
26	1125	37760	0.0195896	1	1
26	1126	37768	0.780289	1	1
26	1127	37776	0.136659	1	1
26	1128	37783	0.496232	1	1
26	1129	37784	0.0556186	1	1
26	1130	37786	0.342896	1	1
26	1131	37789	0.342896	1	1
26	1132	37791	0.144887	1	1
26	1133	37792	0.598121	1	1
26	1134	37795	0.598121	1	1
26	1135	37796	0.598121	1	1
26	1136	37798	0.598121	1	1
26	1137	37804	0.553764	1	1
26	1138	37805	0.14465	1	1
26	1139	37807	0.597726	1	1
26	1140	37834	0.491073	1	1
26	1141	37860	0.634131	1	1
26	1142	37861	0.598121	1	1
26	1143	37868	0.16288	1	1
26	1144	37874	0.598121	1	1
26	1145	37876	0.598121	1	1
26	1146	37888	0.460469	1	1
26	1147	37911	0.196059	1	1
26	1148	37936	0.0447483	1	1
26	1149	37938	0.0381213	1	1
26	1150	37946	0.74614	1	1
26	1151	37958	0.254392	1	1
26	1152	37965	0.0417599	1	1
26	1153	37975	0.499631	1	1
26	1154	37984	0.244761	1	1
26	1155	38001	0.273096	1	1
26	1156	38003	0.491073	1	1
26	1157	38017	0.598121	1	1
26	1158	38018	0.260164	1	1
26	1159	38023	0.491073	1	1
26	1160	38029	0.491073	1	1
26	1161	38032	0.548129	1	1
26	1162	38038	0.549292	1	1
26	1163	38050	0.598121	1	1
26	1164	38053	0.460469	1	1
26	1165	38054	0.460469	1	1
26	1166	38062	0.496232	1	1
26	1167	38074	0.491073	1	1
26	1168	38086	0.409308	1	1
26	1169	38089	0.598121	1	1
26	1170	38118	0.598121	1	1
26	1171	38122	0.598121	1	1
26	1172	38123	0.225323	1	1
26	1173	38133	0.263652	1	1
26	1174	38137	0.308782	1	1
26	1175	38148	0.579017	1	1
26	1176	38151	0.480802	1	1
26	1177	38168	0.103068	1	1
26	1178	38169	0.33898	1	1
26	1179	38175	0.487408	1	1
26	1180	38178	0.598121	1	1
26	1181	38194	0.341614	1	1
26	1182	38196	0.107334	1	1
26	1183	38205	0.331456	1	1
26	1184	38207	0.284243	1	1
26	1185	38211	0.598121	1	1
26	1186	38215	0.257563	1	1
26	1187	38217	0.256411	1	1
26	1188	38241	0.598121	1	1
26	1189	38247	0.0164917	1	1
26	1190	38253	0.664259	1	1
26	1191	38267	0.0166476	1	1
26	1192	38269	0.598121	1	1
26	1193	38308	0.116689	1	1
26	1194	38321	0.181033	1	1
26	1195	38322	0.44887	1	1
26	1196	38328	0.00606281	1	1
26	1197	38336	0.0432016	1	1
26	1198	38370	0.22749	1	1
26	1199	38417	0.254392	1	1
26	1200	38456	0.061223	1	1
26	1201	38518	0.0561392	1	1
26	1202	38744	0.0890157	1	1
26	1203	38777	0.018126	1	1
26	1204	38869	0.718178	1	1
26	1205	38888	0.211573	1	1
26	1206	38919	0.0597904	1	1
26	1207	38951	0.0992462	1	1
26	1208	38959	0.27665	1	1
26	1209	38964	0.100839	1	1
26	1210	38982	0.194161	1	1
26	1211	38983	0.0485522	1	1
26	1212	38987	0.116465	1	1
26	1213	39019	0.322246	1	1
26	1214	39041	0.357025	1	1
26	1215	39066	0.0715388	1	1
26	1216	39079	0.675057	1	1
26	1217	39094	0.675486	1	1
26	1218	39095	0.675811	1	1
26	1219	39098	0.392604	1	1
26	1220	39160	0.619903	1	1
26	1221	39184	0.53711	1	1
26	1222	39220	0.598121	1	1
26	1223	39247	0.125153	1	1
26	1224	39262	0.536699	1	1
26	1225	39277	0.109978	1	1
26	1226	39295	0.598121	1	1
26	1227	39331	0.466015	1	1
26	1228	39347	0.600544	1	1
26	1229	39378	0.182027	1	1
26	1230	39382	0.261959	1	1
26	1231	39397	0.496232	1	1
26	1232	39400	0.598121	1	1
26	1233	39403	0.675486	1	1
26	1234	39410	0.061223	1	1
26	1235	39446	0.392675	1	1
26	1236	39448	0.183587	1	1
26	1237	39463	0.598121	1	1
26	1238	39490	0.392675	1	1
26	1239	39496	0.835259	1	1
26	1240	39577	0.496232	1	1
26	1241	39608	0.273032	1	1
26	1242	39625	0.536699	1	1
26	1243	39635	0.536699	1	1
26	1244	39637	0.623812	1	1
26	1245	39652	0.536699	1	1
26	1246	39653	0.627701	1	1
26	1247	39658	0.598121	1	1
26	1248	39664	0.598121	1	1
26	1249	39679	0.409308	1	1
26	1250	39685	0.491073	1	1
26	1251	39719	0.536699	1	1
26	1252	39739	0.536699	1	1
26	1253	39755	0.109033	1	1
26	1254	39760	0.491073	1	1
26	1255	39787	0.623812	1	1
26	1256	39793	0.536699	1	1
26	1257	39800	0.548129	1	1
26	1258	39826	0.206163	1	1
26	1259	39832	0.536699	1	1
26	1260	39836	0.217248	1	1
26	1261	39850	0.353204	1	1
26	1262	39853	0.598023	1	1
26	1263	39860	0.360817	1	1
26	1264	39862	0.468431	1	1
26	1265	39891	0.378955	1	1
26	1266	39901	0.378955	1	1
26	1267	39907	0.378955	1	1
26	1268	39908	0.555	1	1
26	1269	39913	0.598121	1	1
26	1270	39919	0.555	1	1
26	1271	39931	0.446981	1	1
26	1272	39946	0.598121	1	1
26	1273	39949	0.551497	1	1
26	1274	39952	0.129029	1	1
26	1275	39964	0.0516871	1	1
26	1276	39976	0.637709	1	1
26	1277	39992	0.758707	1	1
26	1278	39993	0.598121	1	1
26	1279	39994	0.598121	1	1
26	1280	40010	0.848889	1	1
26	1281	40013	0.150798	1	1
26	1282	40016	0.628137	1	1
26	1283	40021	0.176179	1	1
26	1284	40022	0.598121	1	1
26	1285	40024	0.319466	1	1
26	1286	40033	0.48435	1	1
26	1287	40043	0.573472	1	1
26	1288	40046	0.598121	1	1
26	1289	40065	0.675486	1	1
26	1290	40066	0.599657	1	1
26	1291	40081	0.306685	1	1
26	1292	40111	0.646598	1	1
26	1293	40115	0.378955	1	1
26	1294	40126	0.555	1	1
26	1295	40143	0.11024	1	1
26	1296	40148	0.748104	1	1
26	1297	40159	0.392675	1	1
26	1298	40174	0.59729	1	1
26	1299	40177	0.389154	1	1
26	1300	40204	0.434963	1	1
26	1301	40217	0.536699	1	1
26	1302	40220	0.0777387	1	1
26	1303	40224	0.598121	1	1
26	1304	40228	0.56109	1	1
26	1305	40245	0.536699	1	1
26	1306	40255	0.536699	1	1
26	1307	40258	0.598121	1	1
26	1308	40259	0.491073	1	1
26	1309	40261	0.543616	1	1
26	1310	40266	0.598121	1	1
26	1311	40269	0.598121	1	1
26	1312	40273	0.834339	1	1
26	1313	40274	0.496232	1	1
26	1314	40288	0.598121	1	1
26	1315	40297	0.0088406	1	1
26	1316	40299	0.546456	1	1
26	1317	40346	0.567586	1	1
26	1318	40354	0.647627	1	1
26	1319	40357	0.598121	1	1
26	1320	40384	0.476147	1	1
26	1321	40393	0.619903	1	1
26	1322	40402	0.701656	1	1
26	1323	40414	0.536699	1	1
26	1324	40417	0.536699	1	1
26	1325	40421	1.05371	1	1
26	1326	40435	0.491073	1	1
26	1327	40453	0.867072	1	1
26	1328	40456	0.619903	1	1
26	1329	40459	0.639723	1	1
26	1330	40460	0.536699	1	1
26	1331	40465	0.468873	1	1
26	1332	40470	0.466574	1	1
26	1333	40483	0.476147	1	1
26	1334	40486	0.476147	1	1
26	1335	40493	0.731954	1	1
26	1336	40496	0.15482	1	1
26	1337	40510	0.279011	1	1
26	1338	40513	0.675486	1	1
26	1339	40522	0.476147	1	1
26	1340	40546	0.56109	1	1
26	1341	40558	0.597033	1	1
26	1342	40561	0.476147	1	1
26	1343	40564	0.598121	1	1
26	1344	40567	0.0518034	1	1
26	1345	40591	0.983263	1	1
26	1346	40595	0.608031	1	1
26	1347	40600	0.627125	1	1
26	1348	40640	0.129029	1	1
26	1349	40658	0.725547	1	1
26	1350	40681	0.160375	1	1
26	1351	40697	0.536699	1	1
26	1352	40729	0.547121	1	1
26	1353	40735	0.460469	1	1
26	1354	40738	0.598121	1	1
26	1355	40751	0.541972	1	1
26	1356	40762	0.598121	1	1
26	1357	40783	0.387836	1	1
26	1358	40795	0.598121	1	1
26	1359	40798	0.598121	1	1
26	1360	40801	0.687716	1	1
26	1361	40825	0.600231	1	1
26	1362	40844	0.598121	1	1
26	1363	40858	0.540653	1	1
26	1364	40873	0.491073	1	1
26	1365	40885	0.496232	1	1
26	1366	40937	1.24742	1	1
26	1367	40951	0.476147	1	1
26	1368	40954	0.456837	1	1
26	1369	40957	0.540841	1	1
26	1370	40985	0.598121	1	1
26	1371	41001	0.536699	1	1
26	1372	41011	0.732558	1	1
26	1373	41014	0.546927	1	1
26	1374	41020	0.540653	1	1
26	1375	41021	0.540653	1	1
26	1376	41044	0.46404	1	1
26	1377	41074	0.543164	1	1
26	1378	41077	0.327463	1	1
26	1379	41119	0.341219	1	1
26	1380	41122	0.675486	1	1
26	1381	41140	0.501157	1	1
26	1382	41155	0.598121	1	1
26	1383	41161	0.598121	1	1
26	1384	41170	2.43977	1	1
26	1385	41182	0.598121	1	1
26	1386	41191	0.598121	1	1
26	1387	41203	0.598121	1	1
26	1388	41206	0.536699	1	1
26	1389	41207	0.216134	1	1
26	1390	41221	0.246558	1	1
26	1391	41224	0.0870695	1	1
26	1392	41230	0.124528	1	1
26	1393	41263	0.553764	1	1
26	1394	41275	0.598121	1	1
26	1395	41281	0.645295	1	1
26	1396	41302	0.409308	1	1
26	1397	41305	0.460469	1	1
26	1398	41314	0.371672	1	1
26	1399	41347	0.460469	1	1
26	1400	41350	0.460469	1	1
26	1401	41401	0.0505233	1	1
26	1402	41402	0.531291	1	1
26	1403	41485	0.0131502	1	1
26	1404	41576	0.114084	1	1
26	1405	41587	0.833358	1	1
26	1406	41653	0.0853832	1	1
26	1407	41710	0.0922851	1	1
26	1408	41728	0.35824	1	1
26	1409	41754	0.426626	1	1
26	1410	41758	0.0498368	1	1
26	1411	41783	0.0681053	1	1
26	1412	41788	0.166982	1	1
26	1413	41807	0.245721	1	1
26	1414	41831	0.933763	1	1
26	1415	41834	0.0394216	1	1
26	1416	41849	0.465227	1	1
26	1417	41875	0.0425527	1	1
26	1418	41880	0.293935	1	1
26	1419	41892	0.122289	1	1
26	1420	41917	0.226577	1	1
26	1421	41932	0.302196	1	1
26	1422	41941	1.11958	1	1
26	1423	41944	1.86017	1	1
26	1424	41953	1.04584	1	1
26	1425	41956	0.180088	1	1
26	1426	41976	0.292623	1	1
26	1427	41977	0.305779	1	1
26	1428	41998	0.709049	1	1
26	1429	42005	0.746412	1	1
26	1430	42006	0.0772658	1	1
26	1431	42022	0.632678	1	1
26	1432	42035	0.347848	1	1
26	1433	42049	0.180323	1	1
26	1434	42052	0.255883	1	1
26	1435	42055	0.305779	1	1
26	1436	42062	0.260882	1	1
26	1437	42081	0.14892	1	1
26	1438	42088	0.305779	1	1
26	1439	42100	0.393463	1	1
26	1440	42104	0.393914	1	1
26	1441	42108	0.293935	1	1
26	1442	42109	0.386287	1	1
26	1443	42117	0.01225	1	1
26	1444	42128	0.542597	1	1
26	1445	42133	0.613107	1	1
26	1446	42140	0.01225	1	1
26	1447	42157	0.514545	1	1
26	1448	42163	0.498849	1	1
26	1449	42176	0.538407	1	1
26	1450	42179	1.14797	1	1
26	1451	42181	0.412462	1	1
26	1452	42184	0.280915	1	1
26	1453	42185	0.538407	1	1
26	1454	42190	0.545893	1	1
26	1455	42193	0.466734	1	1
26	1456	42201	0.462962	1	1
26	1457	42211	0.478552	1	1
26	1458	42217	0.538407	1	1
26	1459	42232	0.605387	1	1
26	1460	42235	0.662356	1	1
26	1461	42253	0.491676	1	1
26	1462	42254	0.74614	1	1
26	1463	42264	0.538721	1	1
26	1464	42289	0.13385	1	1
26	1465	42346	0.0856764	1	1
26	1466	42347	0.103007	1	1
26	1467	42353	0.240616	1	1
26	1468	42366	0.160938	1	1
26	1469	42379	0.362202	1	1
26	1470	42385	0.857758	1	1
26	1471	42386	0.437407	1	1
26	1472	42469	0.699172	1	1
26	1473	42548	0.209822	1	1
26	1474	42568	0.01225	1	1
26	1475	42573	0.0627661	1	1
26	1476	42582	0.193413	1	1
26	1477	42583	0.0848748	1	1
26	1478	42585	0.0835619	1	1
26	1479	42600	0.0835619	1	1
26	1480	42611	0.234712	1	1
26	1481	42618	0.0951677	1	1
26	1482	42623	0.0468997	1	1
26	1483	42636	0.793132	1	1
26	1484	42639	0.407803	1	1
26	1485	42654	0.793132	1	1
26	1486	42663	0.35807	1	1
26	1487	42672	0.339643	1	1
26	1488	42678	0.33387	1	1
26	1489	42695	0.118316	1	1
26	1490	42699	0.624758	1	1
26	1491	42708	0.844746	1	1
26	1492	42711	0.74614	1	1
26	1493	42716	0.54803	1	1
26	1494	42726	0.463561	1	1
26	1495	42741	0.437095	1	1
26	1496	42750	0.390491	1	1
26	1497	42759	0.442903	1	1
26	1498	42762	0.389821	1	1
26	1499	42765	0.389821	1	1
26	1500	42768	0.389821	1	1
26	1501	42771	0.389821	1	1
26	1502	42777	0.389821	1	1
26	1503	42780	0.494239	1	1
26	1504	42789	0.410157	1	1
26	1505	42794	0.286787	1	1
26	1506	42807	0.74614	1	1
26	1507	42828	0.105833	1	1
26	1508	42830	0.165689	1	1
26	1509	42831	0.74614	1	1
26	1510	42833	0.164547	1	1
26	1511	42840	0.158813	1	1
26	1512	42845	0.0161825	1	1
26	1513	42849	0.16736	1	1
26	1514	42851	0.00331252	1	1
26	1515	42870	0.0380083	1	1
26	1516	42878	0.216948	1	1
26	1517	42879	0.0337265	1	1
26	1518	42885	0.026642	1	1
26	1519	42891	0.069449	1	1
26	1520	42894	0.111169	1	1
26	1521	42897	0.271183	1	1
26	1522	42899	0.0642825	1	1
26	1523	42900	0.0863823	1	1
26	1524	42903	0.0703795	1	1
26	1525	42906	0.401941	1	1
26	1526	42915	0.0949003	1	1
26	1527	42927	0.527031	1	1
26	1528	42930	0.00625379	1	1
26	1529	42938	0.231906	1	1
26	1530	42943	0.00625379	1	1
26	1531	42945	0.00140599	1	1
26	1532	42951	0.0437223	1	1
26	1533	42963	0.419833	1	1
26	1534	42969	0.359316	1	1
26	1535	42972	0.43255	1	1
26	1536	42974	0.185223	1	1
26	1537	42975	0.361452	1	1
26	1538	42978	0.738991	1	1
26	1539	42993	0.460247	1	1
26	1540	42996	0.185223	1	1
26	1541	43002	0.698147	1	1
26	1542	43005	0.700797	1	1
26	1543	43008	0.0964263	1	1
26	1544	43026	0.74614	1	1
26	1545	43029	0.255761	1	1
26	1546	43033	0.387076	1	1
26	1547	43035	0.74614	1	1
26	1548	43056	0.743924	1	1
26	1549	43059	0.625936	1	1
26	1550	43074	0.448924	1	1
26	1551	43077	0.74614	1	1
26	1552	43107	0.0850342	1	1
26	1553	43134	0.793132	1	1
26	1554	43139	0.405302	1	1
26	1555	43140	0.389477	1	1
26	1556	43146	0.756261	1	1
26	1557	43155	0.757777	1	1
26	1558	43164	0.245918	1	1
26	1559	43170	0.00521809	1	1
26	1560	43199	0.262351	1	1
26	1561	43224	0.712374	1	1
26	1562	43233	0.155527	1	1
26	1563	43234	0.74614	1	1
26	1564	43244	0.122207	1	1
26	1565	43245	0.721285	1	1
26	1566	43253	0.0715881	1	1
26	1567	43259	0.134156	1	1
26	1568	43260	0.134156	1	1
26	1569	43269	0.0666775	1	1
26	1570	43272	0.0666775	1	1
26	1571	43275	0.331751	1	1
26	1572	43278	0.307782	1	1
26	1573	43281	0.0263312	1	1
26	1574	43293	0.01225	1	1
26	1575	43302	0.238542	1	1
26	1576	43317	0.292319	1	1
26	1577	43320	0.338833	1	1
26	1578	43344	0.0317265	1	1
26	1579	43349	0.080021	1	1
26	1580	43353	0.74614	1	1
26	1581	43359	0.158735	1	1
26	1582	43368	0.155163	1	1
26	1583	43371	0.700797	1	1
26	1584	43374	0.844746	1	1
26	1585	43389	0.220542	1	1
26	1586	43392	0.255385	1	1
26	1587	43393	0.0773546	1	1
26	1588	43409	0.828064	1	1
26	1589	43410	0.0751885	1	1
26	1590	43433	0.220163	1	1
26	1591	43437	0.0175172	1	1
26	1592	43440	0.445861	1	1
26	1593	43443	0.191591	1	1
26	1594	43449	0.328916	1	1
26	1595	43458	0.379124	1	1
26	1596	43461	0.393869	1	1
26	1597	43470	0.338706	1	1
26	1598	43483	0.279421	1	1
26	1599	43502	0.0268695	1	1
26	1600	43506	0.0259653	1	1
26	1601	43522	0.338237	1	1
26	1602	43530	0.176049	1	1
26	1603	43532	0.816908	1	1
26	1604	43575	0.0934956	1	1
26	1605	43581	0.115906	1	1
26	1606	43598	0.022198	1	1
26	1607	43602	0.74614	1	1
26	1608	43603	0.546297	1	1
26	1609	43631	0.398444	1	1
26	1610	43635	0.211264	1	1
26	1611	43638	0.221331	1	1
26	1612	43640	0.539016	1	1
26	1613	43660	0.652405	1	1
26	1614	43685	0.0853555	1	1
26	1615	43695	0.0325077	1	1
26	1616	43702	0.0156759	1	1
26	1617	43703	0.74614	1	1
26	1618	43746	0.0819516	1	1
26	1619	43781	0.754725	1	1
26	1620	43818	0.00045565	1	1
26	1621	43843	0.00817745	1	1
26	1622	43845	0.111672	1	1
26	1623	43862	0.129079	1	1
26	1624	43878	0.333109	1	1
26	1625	43911	0.389847	1	1
26	1626	43912	0.128169	1	1
26	1627	43932	0.0587519	1	1
26	1628	43935	1.04863	1	1
26	1629	43940	0.22513	1	1
26	1630	43941	0.0100439	1	1
26	1631	43995	0.0246569	1	1
26	1632	43998	0.0246569	1	1
26	1633	44001	0.0246569	1	1
26	1634	44004	0.00793438	1	1
26	1635	44007	0.07742	1	1
26	1636	44016	0.22513	1	1
26	1637	44025	0.793063	1	1
26	1638	44031	0.74614	1	1
26	1639	44034	0.255998	1	1
26	1640	44043	0.22513	1	1
26	1641	44052	0.379859	1	1
26	1642	44061	0.0585036	1	1
26	1643	44064	0.0813839	1	1
26	1644	44079	0.0816031	1	1
26	1645	44085	0.157573	1	1
26	1646	44088	0.108679	1	1
26	1647	44097	0.74614	1	1
26	1648	44103	0.0379823	1	1
26	1649	44106	0.104349	1	1
26	1650	44107	0.129113	1	1
26	1651	44121	0.314107	1	1
26	1652	44125	0.22513	1	1
26	1653	44127	0.274011	1	1
26	1654	44136	0.184793	1	1
26	1655	44139	0.184077	1	1
26	1656	44151	0.435989	1	1
26	1657	44163	0.0535141	1	1
26	1658	44169	0.74614	1	1
26	1659	44178	0.0816031	1	1
26	1660	44199	0.0788463	1	1
26	1661	44202	0.314107	1	1
26	1662	44211	0.471749	1	1
26	1663	44213	0.299078	1	1
26	1664	44214	0.104661	1	1
26	1665	44232	0.22513	1	1
26	1666	44235	0.164349	1	1
26	1667	44256	0.176712	1	1
26	1668	44259	0.74614	1	1
26	1669	44262	0.271435	1	1
26	1670	44271	0.228464	1	1
26	1671	44274	0.261591	1	1
26	1672	44275	0.270343	1	1
26	1673	44301	0.226524	1	1
26	1674	44304	0.280909	1	1
26	1675	44305	0.258529	1	1
26	1676	44310	0.169366	1	1
26	1677	44349	0.355903	1	1
26	1678	44352	0.581777	1	1
26	1679	44370	0.173626	1	1
26	1680	44376	0.0132736	1	1
26	1681	44386	0.74614	1	1
26	1682	44388	0.844746	1	1
26	1683	44394	0.74614	1	1
26	1684	44448	0.370024	1	1
26	1685	44451	0.248014	1	1
26	1686	44457	0.345192	1	1
26	1687	44461	0.202088	1	1
26	1688	44463	0.641055	1	1
26	1689	44466	0.212311	1	1
26	1690	44467	0.148072	1	1
26	1691	44468	0.14892	1	1
26	1692	44469	0.467643	1	1
26	1693	44472	0.844746	1	1
26	1694	44476	0.211264	1	1
26	1695	44478	0.552257	1	1
26	1696	44481	0.104365	1	1
26	1697	44484	0.104365	1	1
26	1698	44496	0.104365	1	1
26	1699	44499	0.0149001	1	1
26	1700	44514	0.104365	1	1
26	1701	44523	0.74614	1	1
26	1702	44529	0.333109	1	1
26	1703	44535	0.184077	1	1
26	1704	44544	0.221978	1	1
26	1705	44547	0.0512337	1	1
26	1706	44550	0.104365	1	1
26	1707	44551	0.0535141	1	1
26	1708	44556	0.104365	1	1
26	1709	44566	0.0703198	1	1
26	1710	44568	0.0843736	1	1
26	1711	44577	0.338497	1	1
26	1712	44580	0.221978	1	1
26	1713	44595	0.338497	1	1
26	1714	44601	0.563105	1	1
26	1715	44610	0.285507	1	1
26	1716	44616	0.094605	1	1
26	1717	44622	0.094605	1	1
26	1718	44625	0.104365	1	1
26	1719	44631	0.104365	1	1
26	1720	44676	0.147619	1	1
26	1721	44685	0.147619	1	1
26	1722	44709	0.844746	1	1
26	1723	44718	0.24692	1	1
26	1724	44724	0.070749	1	1
26	1725	44748	0.260123	1	1
26	1726	44754	0.74614	1	1
26	1727	44766	0.640727	1	1
26	1728	44769	0.147619	1	1
26	1729	44778	0.147619	1	1
26	1730	44787	0.147619	1	1
26	1731	44791	1.00151	1	1
26	1732	44796	0.147619	1	1
26	1733	44799	0.0819669	1	1
26	1734	44802	0.844746	1	1
26	1735	44803	0.104365	1	1
26	1736	44805	0.221978	1	1
26	1737	44820	0.214868	1	1
26	1738	44829	0.168966	1	1
26	1739	44841	0.261591	1	1
26	1740	44847	0.0535141	1	1
26	1741	44850	0.104365	1	1
26	1742	44862	0.295888	1	1
26	1743	44884	0.0535141	1	1
26	1744	44909	0.147619	1	1
26	1745	44918	0.261591	1	1
26	1746	44921	0.104365	1	1
26	1747	44927	0.104365	1	1
26	1748	44936	0.250999	1	1
26	1749	44942	0.184187	1	1
26	1750	44943	0.0263312	1	1
26	1751	44948	0.280909	1	1
26	1752	44959	0.14892	1	1
26	1753	44965	0.338497	1	1
26	1754	44972	0.333109	1	1
26	1755	44973	0.189247	1	1
26	1756	44984	0.160713	1	1
26	1757	44987	0.103376	1	1
26	1758	44993	0.201533	1	1
26	1759	44997	0.365296	1	1
26	1760	44999	0.103376	1	1
26	1761	45014	0.410436	1	1
26	1762	45017	0.404617	1	1
26	1763	45036	0.74614	1	1
26	1764	45041	0.173626	1	1
26	1765	45050	0.342507	1	1
26	1766	45053	0.173626	1	1
26	1767	45067	0.365296	1	1
26	1768	45068	0.74614	1	1
26	1769	45071	0.330646	1	1
26	1770	45083	0.338497	1	1
26	1771	45086	0.338497	1	1
26	1772	45101	0.338497	1	1
26	1773	45107	0.448483	1	1
26	1774	45119	0.103376	1	1
26	1775	45125	0.280909	1	1
26	1776	45128	0.338497	1	1
26	1777	45131	0.333109	1	1
26	1778	45143	0.261591	1	1
26	1779	45155	0.261591	1	1
26	1780	45161	0.173626	1	1
26	1781	45204	0.303102	1	1
26	1782	45246	0.271752	1	1
26	1783	45251	0.0669486	1	1
26	1784	45293	0.338497	1	1
26	1785	45311	0.104365	1	1
26	1786	45314	0.104365	1	1
26	1787	45338	0.261591	1	1
26	1788	45341	0.104365	1	1
26	1789	45348	0.565096	1	1
26	1790	45350	0.101034	1	1
26	1791	45383	0.0669486	1	1
26	1792	45384	0.638937	1	1
26	1793	45389	0.167295	1	1
26	1794	45406	0.74614	1	1
26	1795	45417	0.185217	1	1
26	1796	45428	0.038865	1	1
26	1797	45437	0.104365	1	1
26	1798	45448	0.434573	1	1
26	1799	45464	0.0669486	1	1
26	1800	45473	0.101034	1	1
26	1801	45488	0.215336	1	1
26	1802	45495	0.104365	1	1
26	1803	45510	0.409508	1	1
26	1804	45512	0.0890855	1	1
26	1805	45514	0.147619	1	1
26	1806	45549	0.185156	1	1
26	1807	45551	0.147619	1	1
26	1808	45554	0.147619	1	1
26	1809	45624	0.104365	1	1
26	1810	45670	0.0140194	1	1
26	1811	45679	0.74614	1	1
26	1812	45694	0.015441	1	1
26	1813	45719	0.191835	1	1
26	1814	45736	0.468233	1	1
26	1815	45744	0.059334	1	1
26	1816	45748	0.232865	1	1
26	1817	45774	0.0961762	1	1
26	1818	45775	0.161374	1	1
26	1819	45794	0.0325077	1	1
26	1820	45800	0.199284	1	1
26	1821	45805	0.104365	1	1
26	1822	45820	0.0379532	1	1
26	1823	45832	0.123223	1	1
26	1824	45835	0.0809172	1	1
26	1825	45857	0.0408872	1	1
26	1826	45862	0.191835	1	1
26	1827	45874	0.104365	1	1
26	1828	45883	0.844746	1	1
26	1829	45889	0.191835	1	1
26	1830	45910	0.285507	1	1
26	1831	45913	0.276951	1	1
26	1832	45919	0.350064	1	1
26	1833	45925	0.0462134	1	1
26	1834	45928	0.0358876	1	1
26	1835	45931	0.0832718	1	1
26	1836	45949	0.0215832	1	1
26	1837	45952	0.505577	1	1
26	1838	45953	0.505577	1	1
26	1839	45955	0.505577	1	1
26	1840	45958	0.66954	1	1
26	1841	45961	0.657871	1	1
26	1842	45967	0.581777	1	1
26	1843	45991	0.0140194	1	1
26	1844	45994	0.116881	1	1
26	1845	45997	0.351145	1	1
26	1846	46000	0.0445847	1	1
26	1847	46006	0.416143	1	1
26	1848	46009	0.41294	1	1
26	1849	46015	0.684717	1	1
26	1850	46018	0.62604	1	1
26	1851	46021	0.0574973	1	1
26	1852	46022	0.14892	1	1
26	1853	46024	0.44457	1	1
26	1854	46027	0.378666	1	1
26	1855	46028	0.263911	1	1
26	1856	46030	0.511611	1	1
26	1857	46036	0.389229	1	1
26	1858	46039	0.762639	1	1
26	1859	46042	0.770268	1	1
26	1860	46054	0.0342109	1	1
26	1861	46060	0.399509	1	1
26	1862	46066	0.0650429	1	1
26	1863	46072	0.955125	1	1
26	1864	46102	0.204972	1	1
26	1865	46105	0.14363	1	1
26	1866	46108	0.164024	1	1
26	1867	46114	0.817253	1	1
26	1868	46117	0.147962	1	1
26	1869	46126	0.0481424	1	1
26	1870	46129	0.0247054	1	1
26	1871	46135	0.213729	1	1
26	1872	46141	0.466949	1	1
26	1873	46147	0.173626	1	1
26	1874	46148	0.173626	1	1
26	1875	46156	0.638988	1	1
26	1876	46162	0.392868	1	1
26	1877	46168	0.234315	1	1
26	1878	46171	0.646479	1	1
26	1879	46174	0.74614	1	1
26	1880	46183	0.10491	1	1
26	1881	46189	0.186678	1	1
26	1882	46195	0.202584	1	1
26	1883	46198	0.724285	1	1
26	1884	46219	0.104365	1	1
26	1885	46228	0.731927	1	1
26	1886	46230	0.724794	1	1
26	1887	46231	0.0144694	1	1
26	1888	46246	0.173626	1	1
26	1889	46249	0.74614	1	1
26	1890	46261	0.748471	1	1
26	1891	46269	0.114851	1	1
26	1892	46270	0.618677	1	1
26	1893	46288	0.0293536	1	1
26	1894	46294	0.0983705	1	1
26	1895	46303	0.350064	1	1
26	1896	46345	0.203839	1	1
26	1897	46357	0.324489	1	1
26	1898	46372	0.475965	1	1
26	1899	46384	0.237161	1	1
26	1900	46426	0.389847	1	1
26	1901	46447	0.323837	1	1
26	1902	46462	0.268202	1	1
26	1903	46468	0.0404771	1	1
26	1904	46471	0.350064	1	1
26	1905	46489	0.262362	1	1
26	1906	46504	0.182039	1	1
26	1907	46509	0.467643	1	1
26	1908	46513	0.6681	1	1
26	1909	46561	0.0175028	1	1
26	1910	46564	0.104365	1	1
26	1911	46567	0.0872306	1	1
26	1912	46573	0.103086	1	1
26	1913	46594	0.0179062	1	1
26	1914	46597	0.115893	1	1
26	1915	46613	0.559742	1	1
26	1916	46643	0.0439845	1	1
26	1917	46663	0.275276	1	1
26	1918	46664	0.0173697	1	1
26	1919	46701	0.559742	1	1
26	1920	46734	0.104365	1	1
26	1921	46737	0.461779	1	1
26	1922	46746	0.437574	1	1
26	1923	46749	0.554769	1	1
26	1924	46752	0.102863	1	1
26	1925	46758	0.530546	1	1
26	1926	46779	0.0107377	1	1
26	1927	46785	0.530546	1	1
26	1928	46796	0.0404771	1	1
26	1929	46815	0.0321242	1	1
26	1930	46835	0.0142735	1	1
26	1931	46836	0.0371895	1	1
26	1932	46842	0.0634699	1	1
26	1933	46938	1.04847	1	1
26	1934	47011	0.599196	1	1
26	1935	47014	0.0153086	1	1
26	1936	47016	0.0421105	1	1
26	1937	47020	0.118182	1	1
26	1938	47026	0.0934668	1	1
26	1939	47027	0.0456218	1	1
26	1940	47032	0.108716	1	1
26	1941	47033	0.0407101	1	1
26	1942	47053	1.2194	1	1
26	1943	47059	0.384507	1	1
26	1944	47073	0.114603	1	1
26	1945	47074	0.42752	1	1
26	1946	47092	0.257549	1	1
26	1947	47288	0.328176	1	1
26	1948	47299	0.681828	1	1
26	1949	47308	0.0514311	1	1
26	1950	47309	0.685752	1	1
26	1951	47312	0.311709	1	1
26	1952	47339	0.0377314	1	1
26	1953	47341	0.259709	1	1
26	1954	47345	0.11803	1	1
26	1955	47424	0.0392172	1	1
26	1956	47438	0.0313179	1	1
26	1957	47455	0.0094951	1	1
26	1958	47467	0.46032	1	1
26	1959	47526	0.265818	1	1
26	1960	47529	0.881594	1	1
26	1961	47531	0.138925	1	1
26	1962	47540	0.447383	1	1
26	1963	47542	0.147811	1	1
26	1964	47548	0.229355	1	1
26	1965	47558	0.208667	1	1
26	1966	47589	1.28632	1	1
26	1967	47622	0.124816	1	1
26	1968	47753	0.262353	1	1
26	1969	47756	0.122219	1	1
26	1970	47758	0.738784	1	1
26	1971	47760	0.174651	1	1
26	1972	47786	0.262353	1	1
26	1973	47790	0.0304303	1	1
26	1974	47791	0.0304303	1	1
26	1975	47802	0.0304303	1	1
26	1976	47803	0.0304303	1	1
26	1977	47820	0.0183608	1	1
26	1978	47822	0.284345	1	1
26	1979	47830	0.536918	1	1
26	1980	47831	0.536918	1	1
26	1981	47840	0.461357	1	1
26	1982	47867	0.861745	1	1
26	1983	47876	0.399689	1	1
26	1984	47877	0.0306195	1	1
26	1985	47890	0.399689	1	1
26	1986	47897	0.732027	1	1
26	1987	47898	0.399689	1	1
26	1988	47899	0.233644	1	1
26	1989	47913	0.116133	1	1
26	1990	47917	0.875229	1	1
26	1991	47918	0.466571	1	1
26	1992	47919	0.74252	1	1
26	1993	47932	0.0882709	1	1
26	1994	47934	0.167737	1	1
26	1995	47952	0.0295404	1	1
26	1996	47959	0.452719	1	1
26	1997	47968	0.991367	1	1
26	1998	47969	0.933224	1	1
26	1999	47972	0.374599	1	1
26	2000	47977	0.804858	1	1
[truncated: 114,899 more rows]
