# Supplementary figures and images for: Genome-wide identification of lineage and locus specific variation associated with pneumococcal carriage duration
Source: eLife journal article supplement (doi:10.7554/elife.26255), 2017-07-25

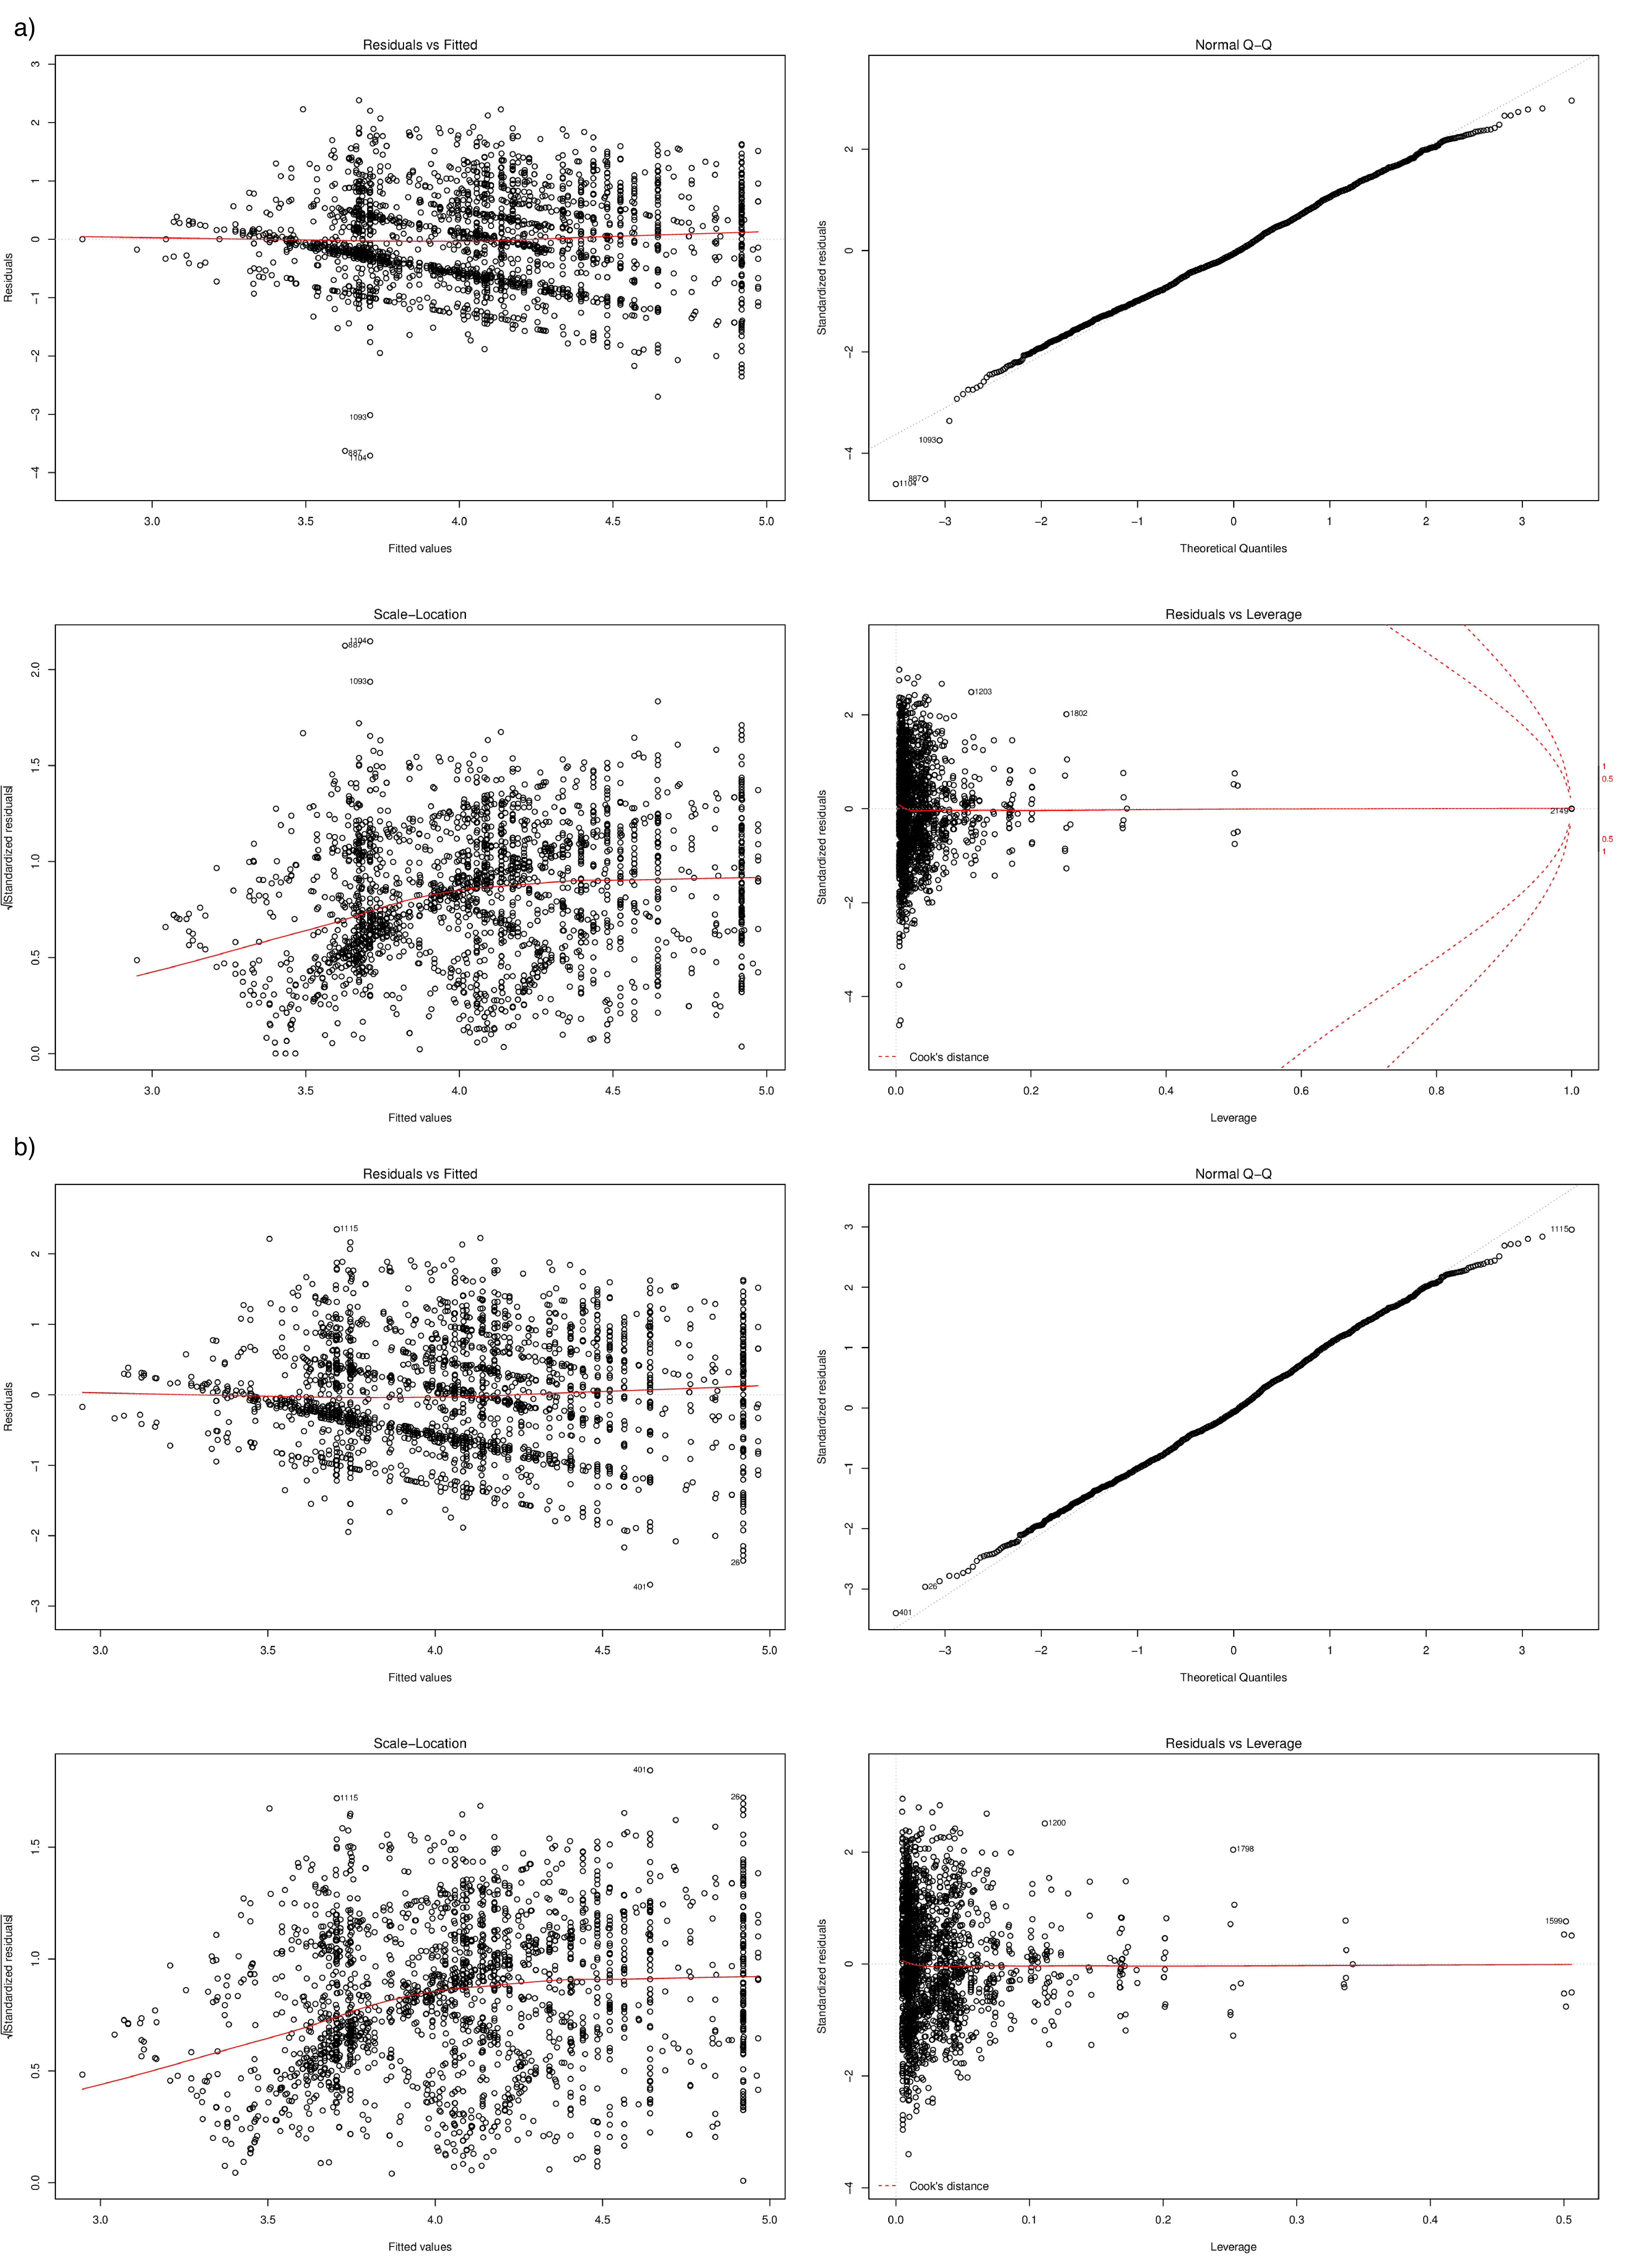

Supplement: supp [file elife-26255-supp-v1.zip › elife_poa_e26255_Figure_3_Figure_Supplement_1.png]

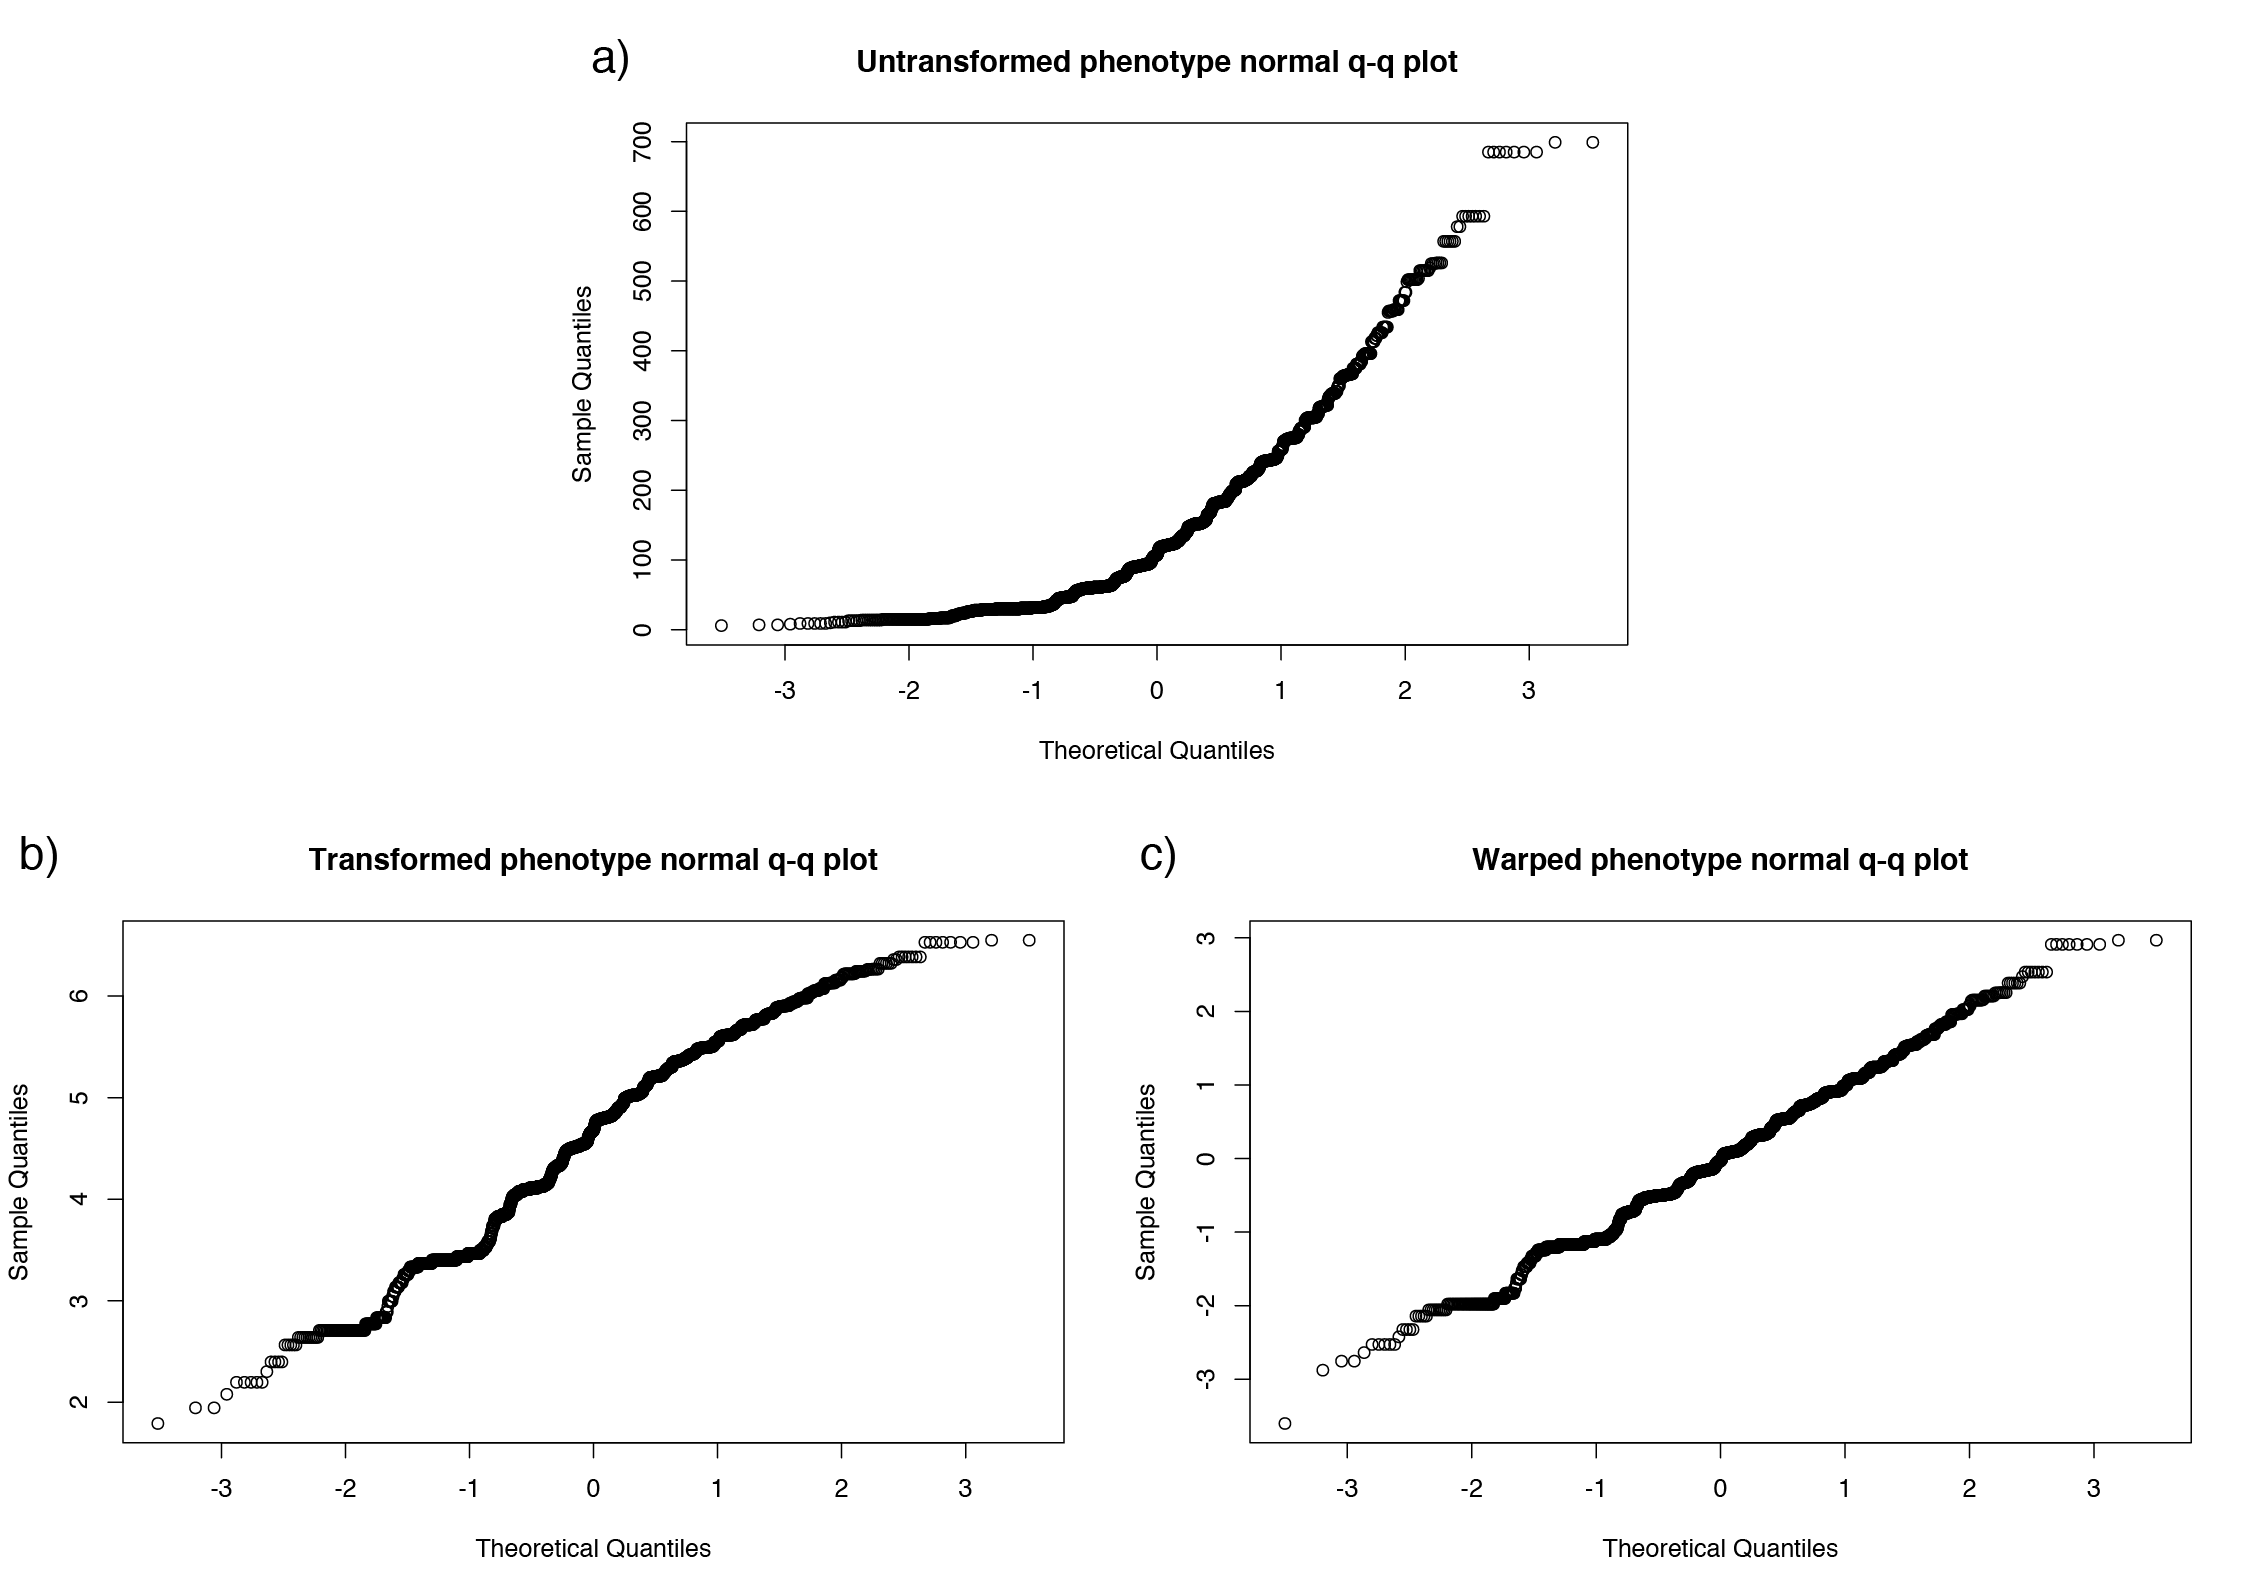

Supplement: supp [file elife-26255-supp-v1.zip › elife_poa_e26255_Figure_3_Figure_Supplement_3.png]

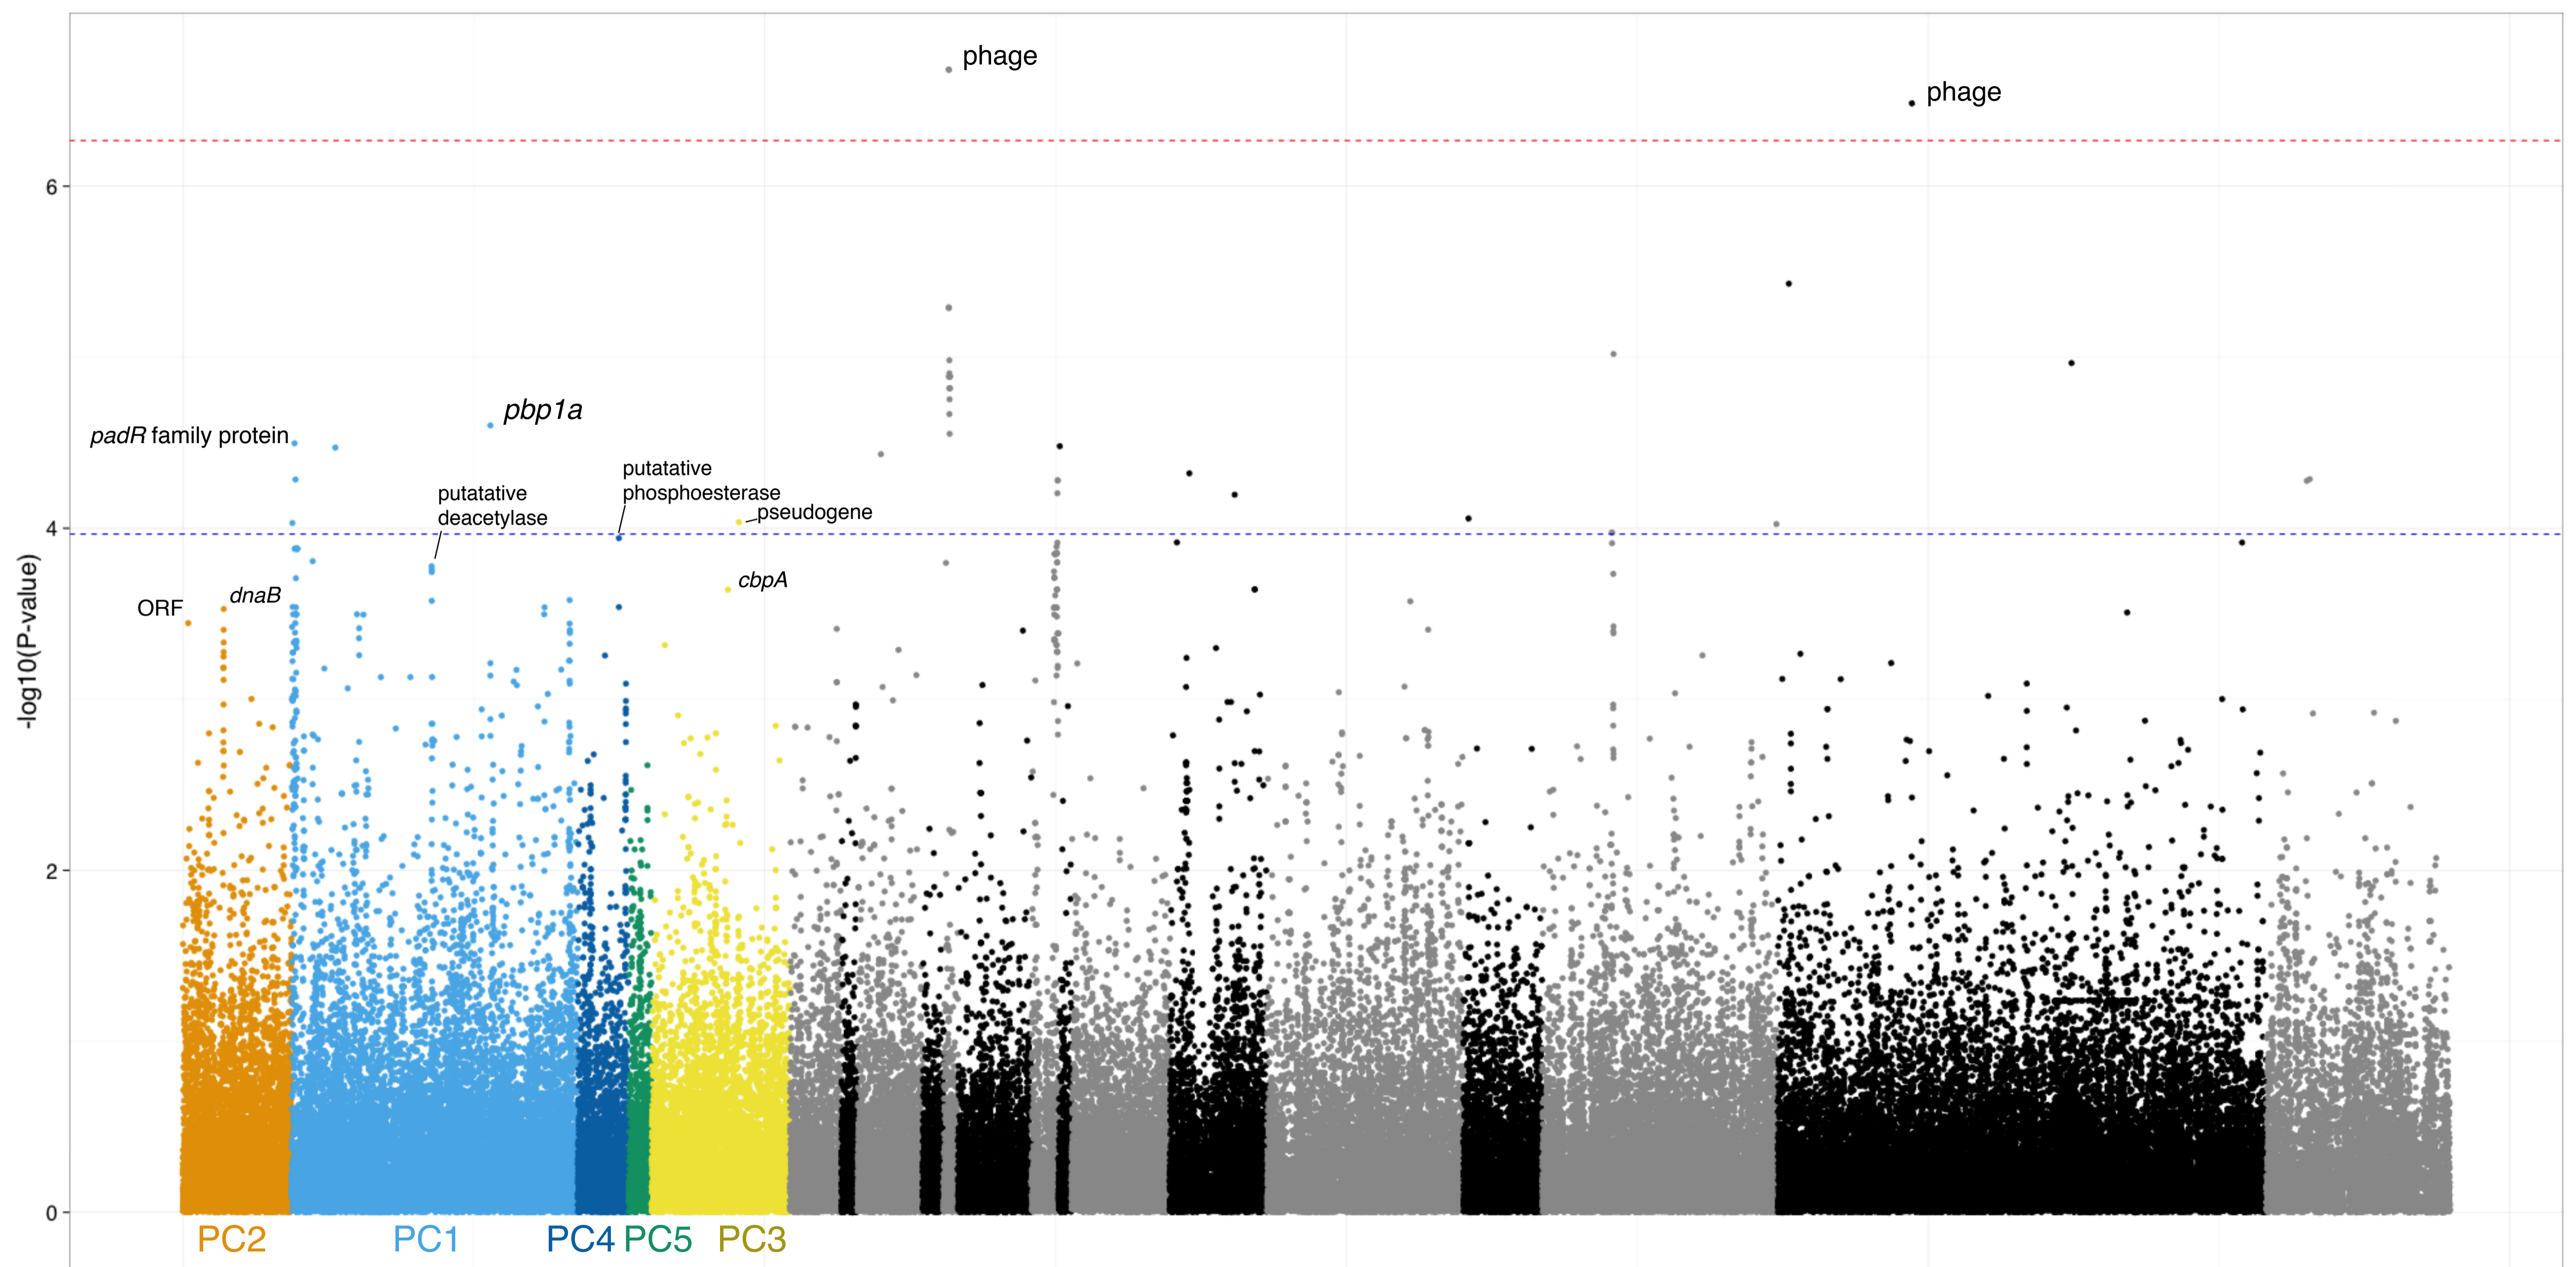

Supplement: supp [file elife-26255-supp-v1.zip › elife_poa_e26255_Figure_5_Figure_Supplement_1.pdf]

# Longest blastn hits

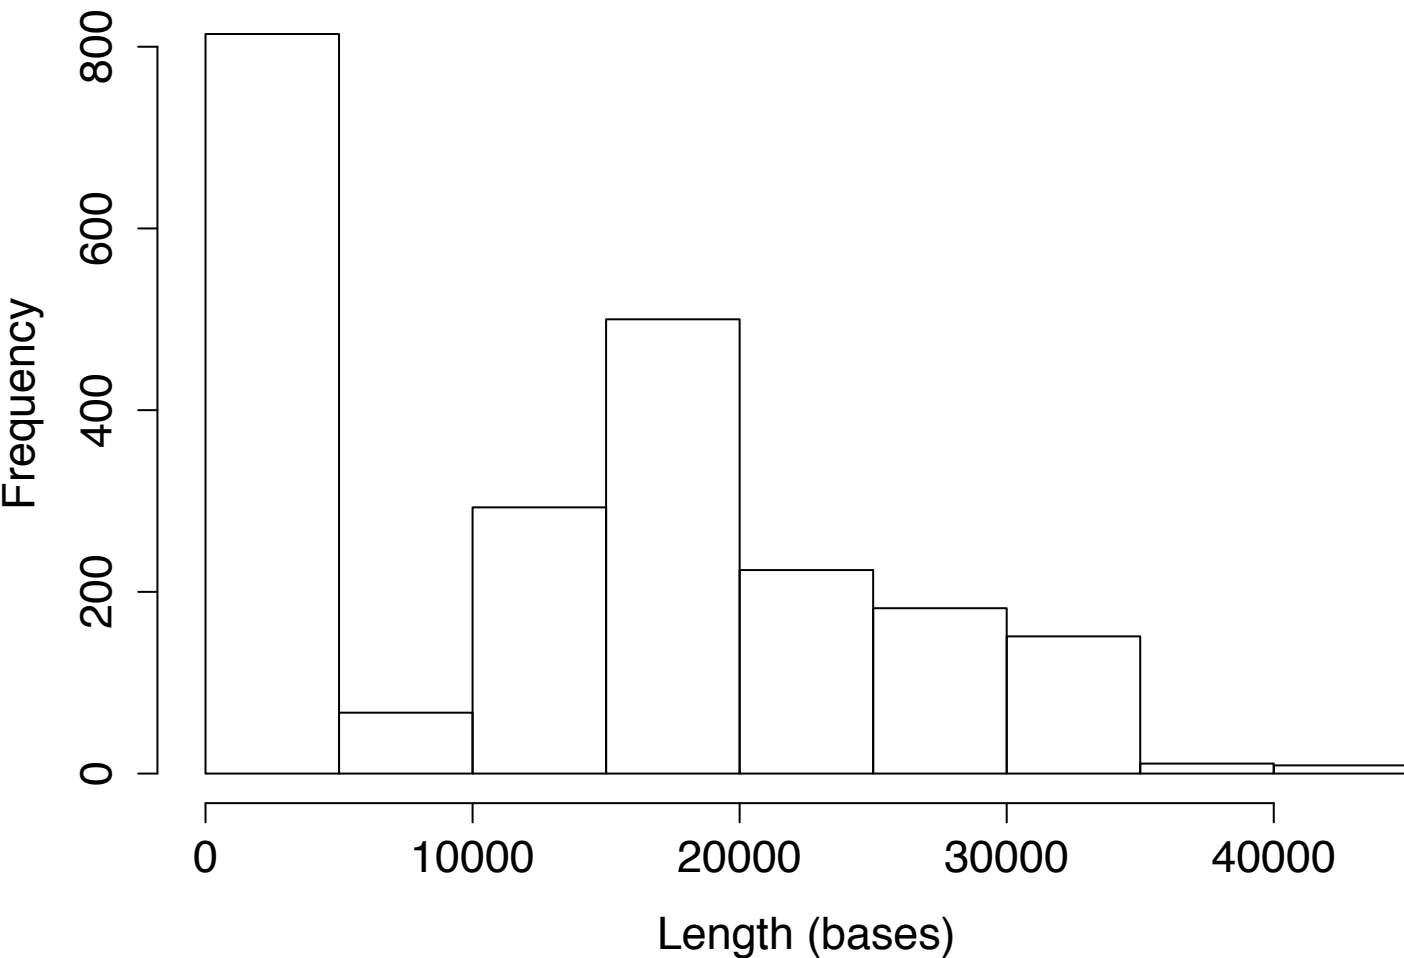

Supplement: supp [file elife-26255-supp-v1.zip › elife_poa_e26255_Figure_5_Figure_Supplement_5.pdf]

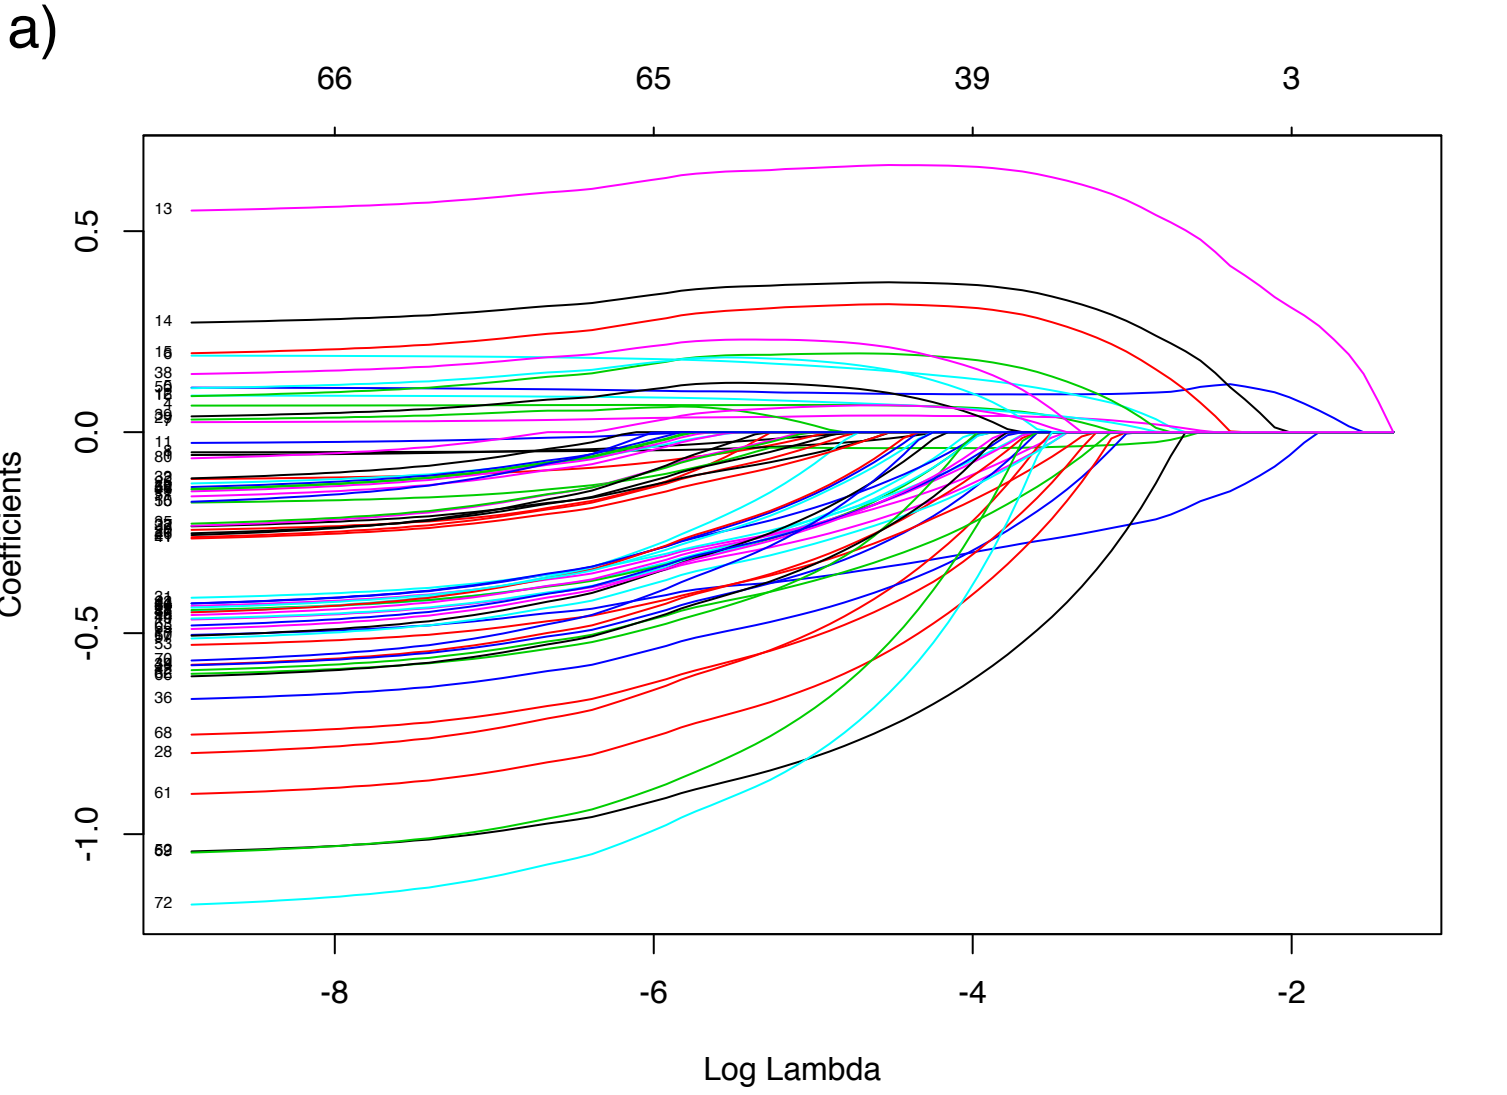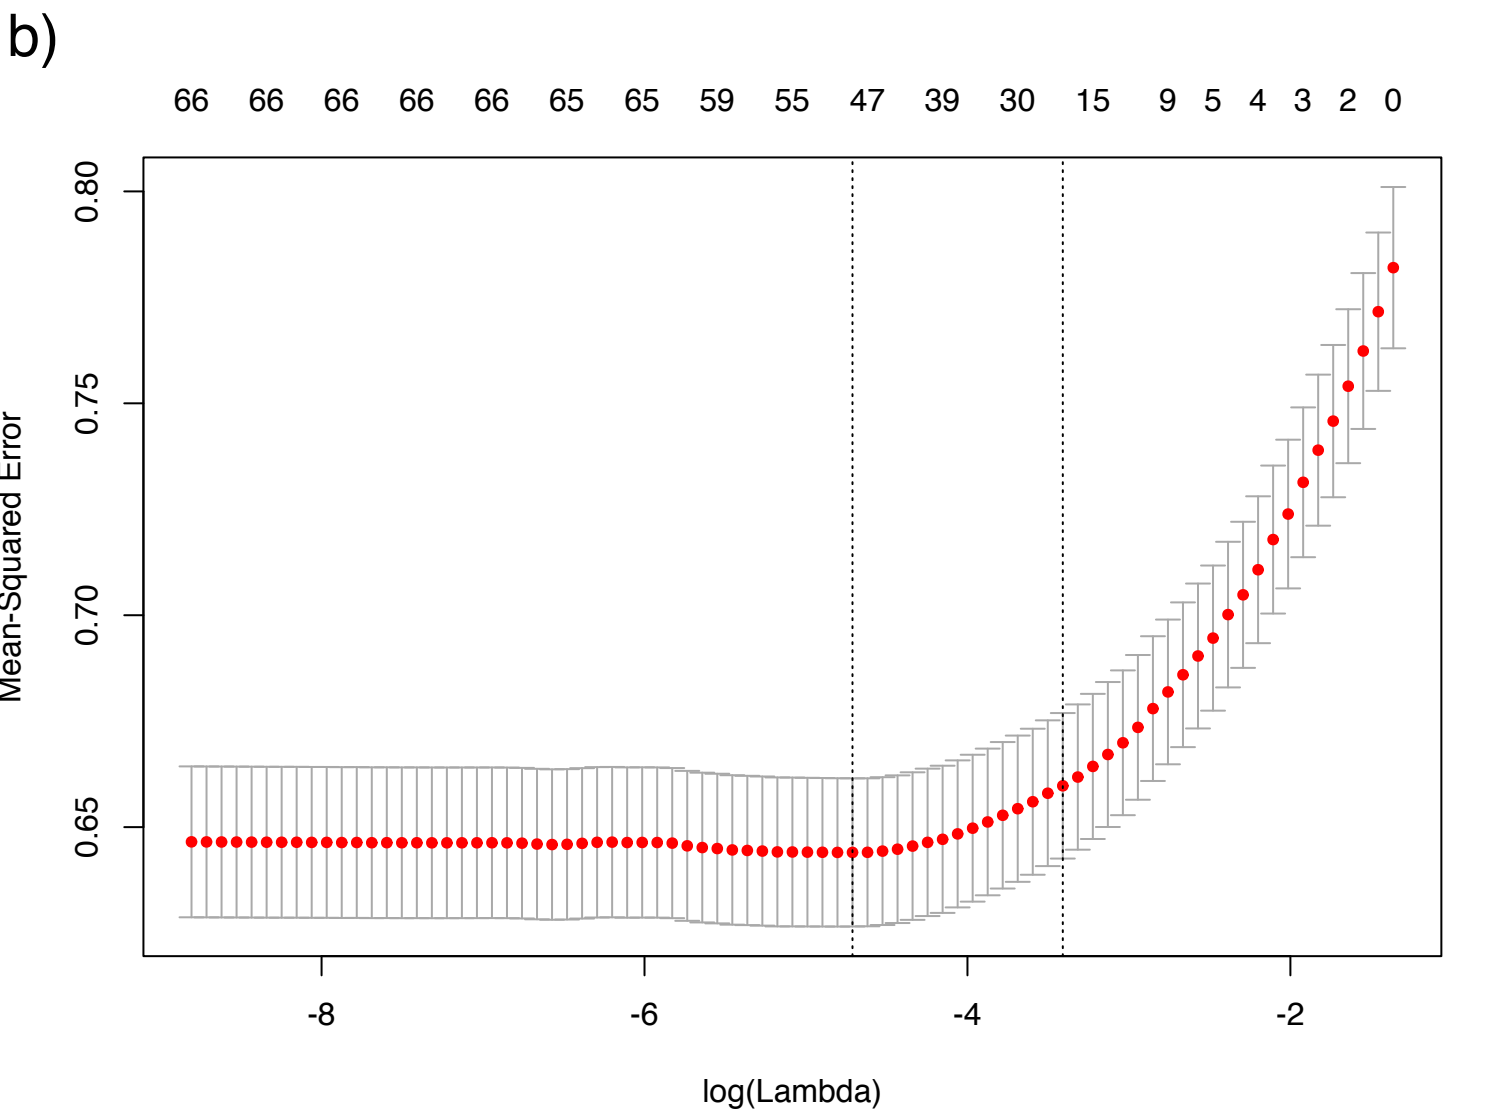

Supplement: supp [file elife-26255-supp-v1.zip › elife_poa_e26255_Figure_4_Figure_Supplement_4.pdf]

## Genetic distances between isolates

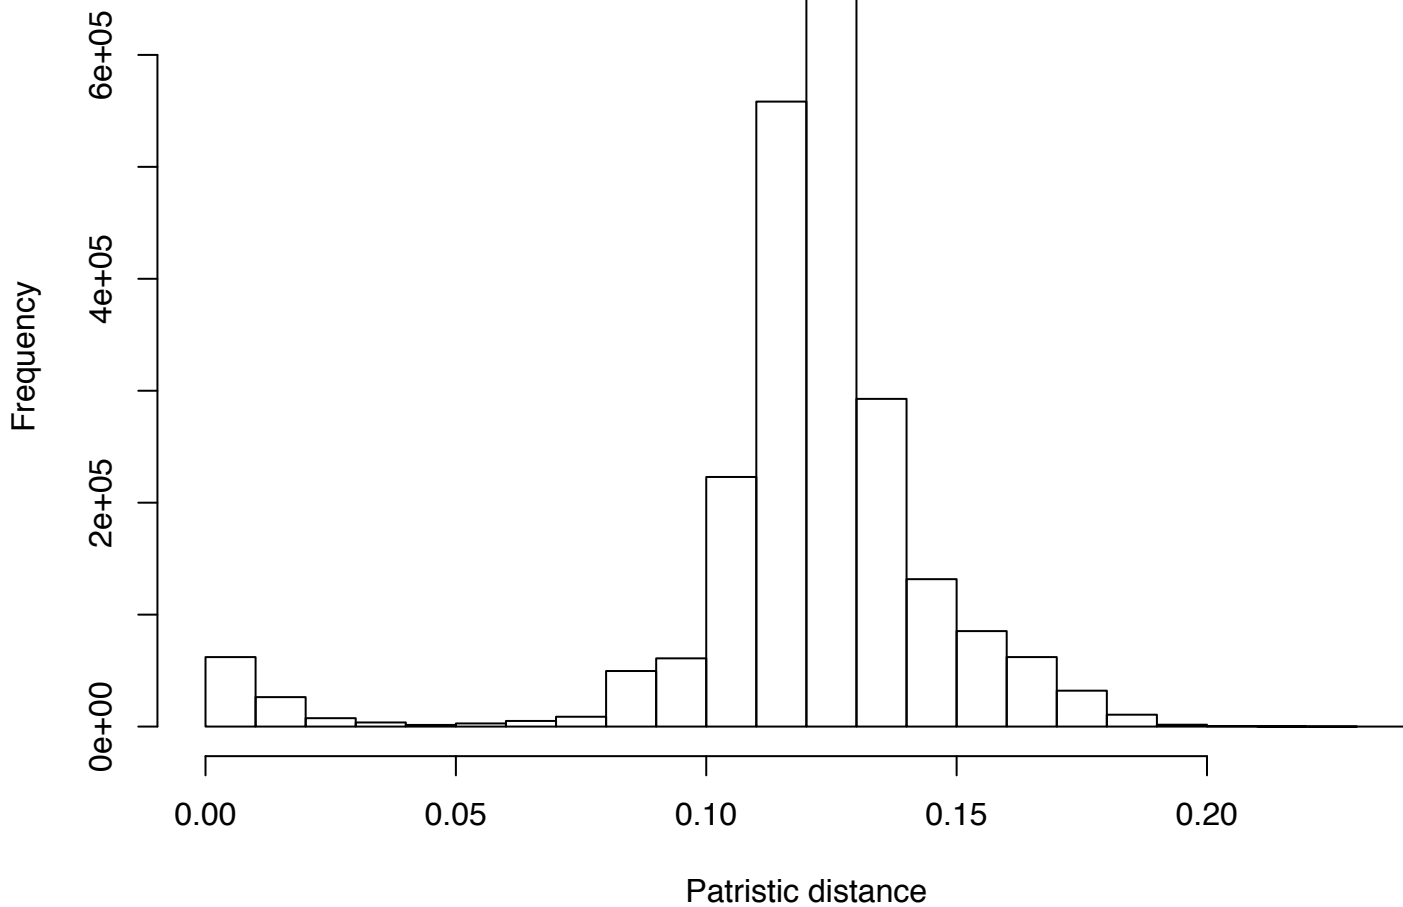

Supplement: supp [file elife-26255-supp-v1.zip › elife_poa_e26255_Figure_4_Figure_Supplement_2.pdf]

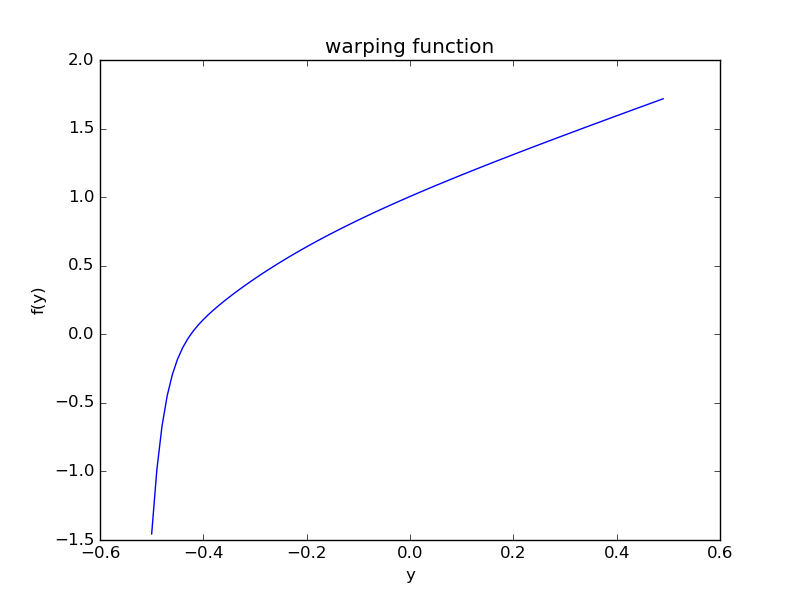

Supplement: supp [file elife-26255-supp-v1.zip › elife_poa_e26255_Figure_3_Figure_Supplement_2.png]

## Lengths of significant k-mers

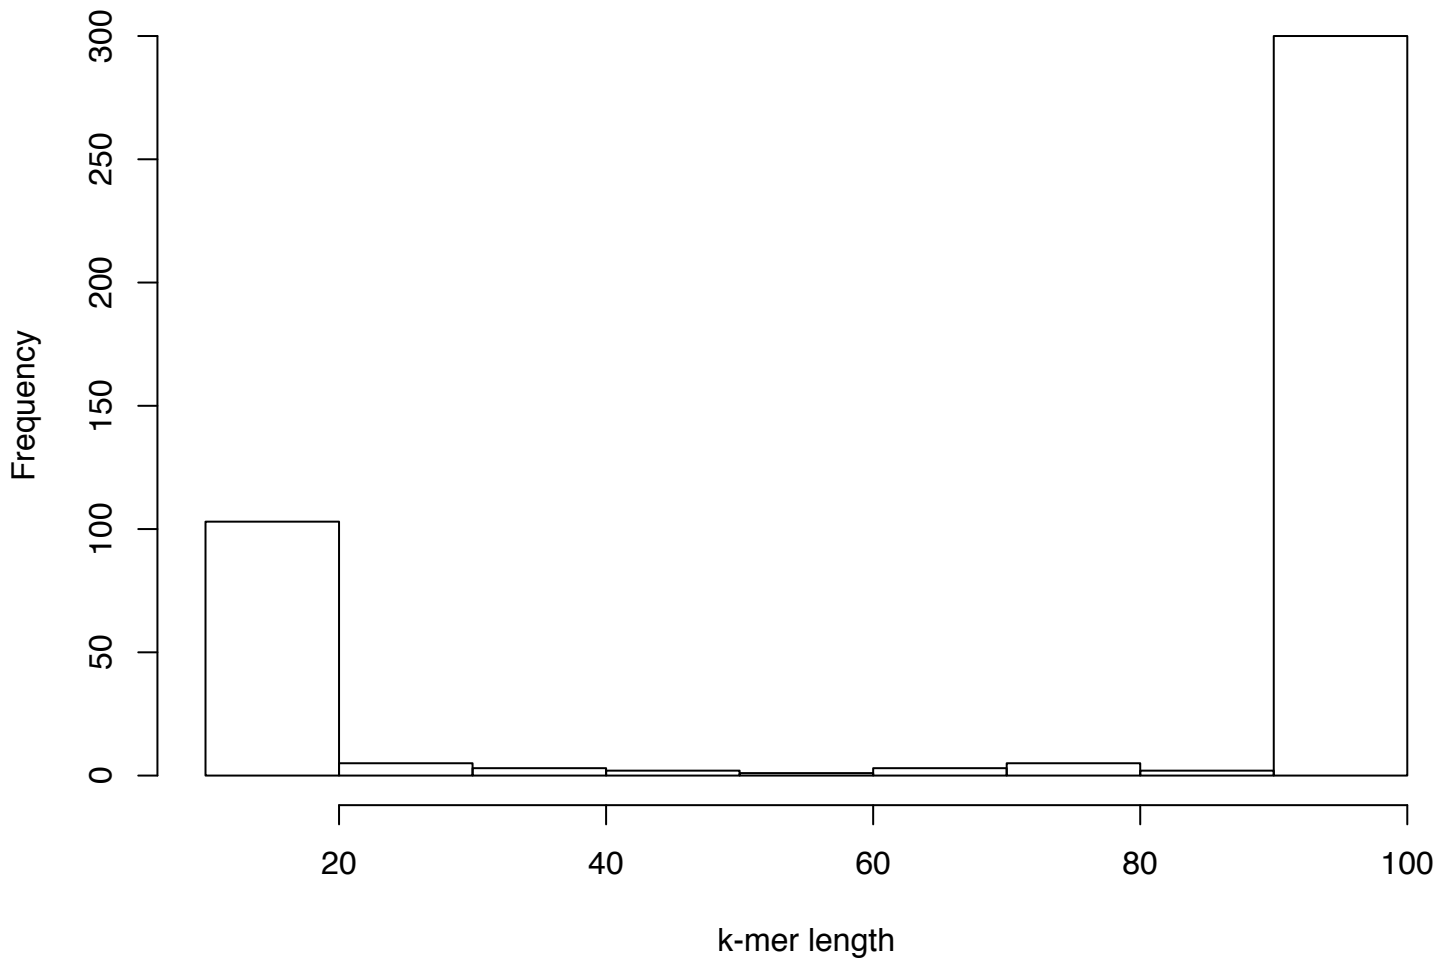

Supplement: supp [file elife-26255-supp-v1.zip › elife_poa_e26255_Figure_5_Figure_Supplement_2.pdf]

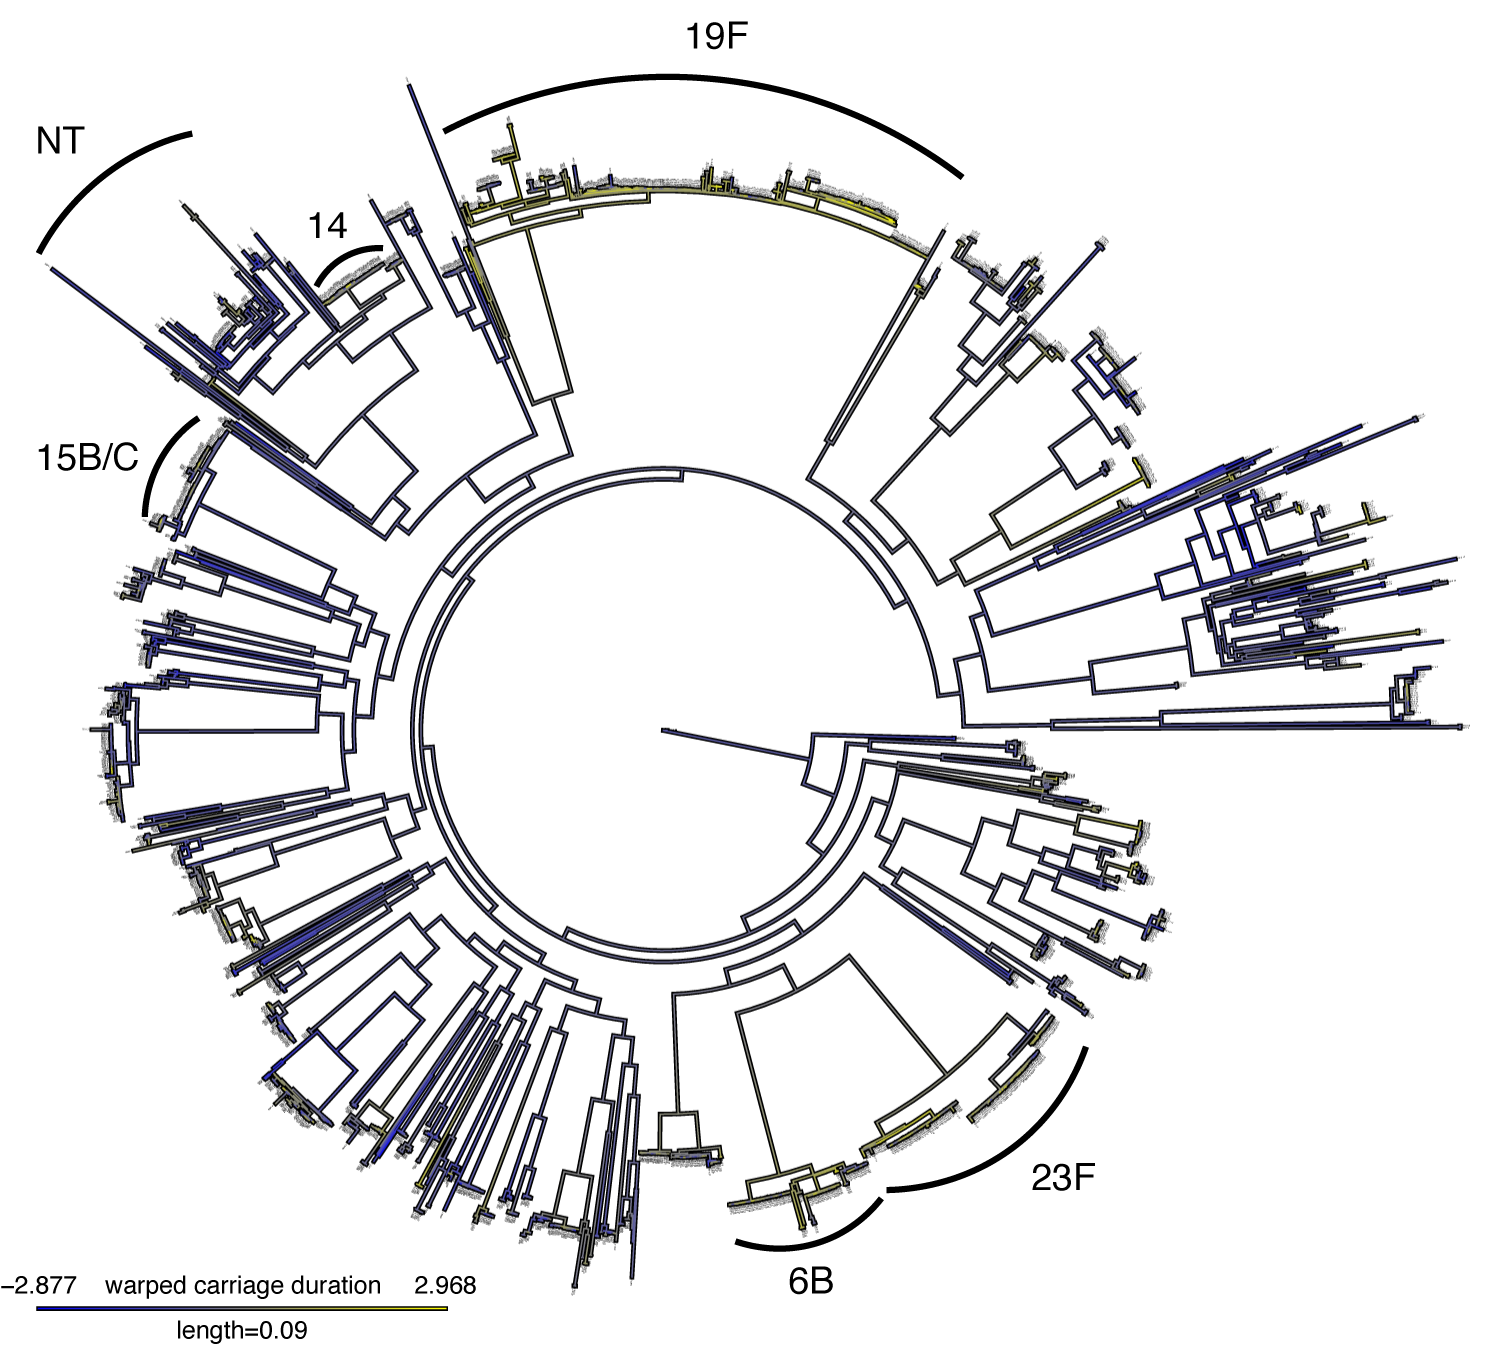

Supplement: supp [file elife-26255-supp-v1.zip › elife_poa_e26255_Figure_4_Figure_Supplement_1.png]

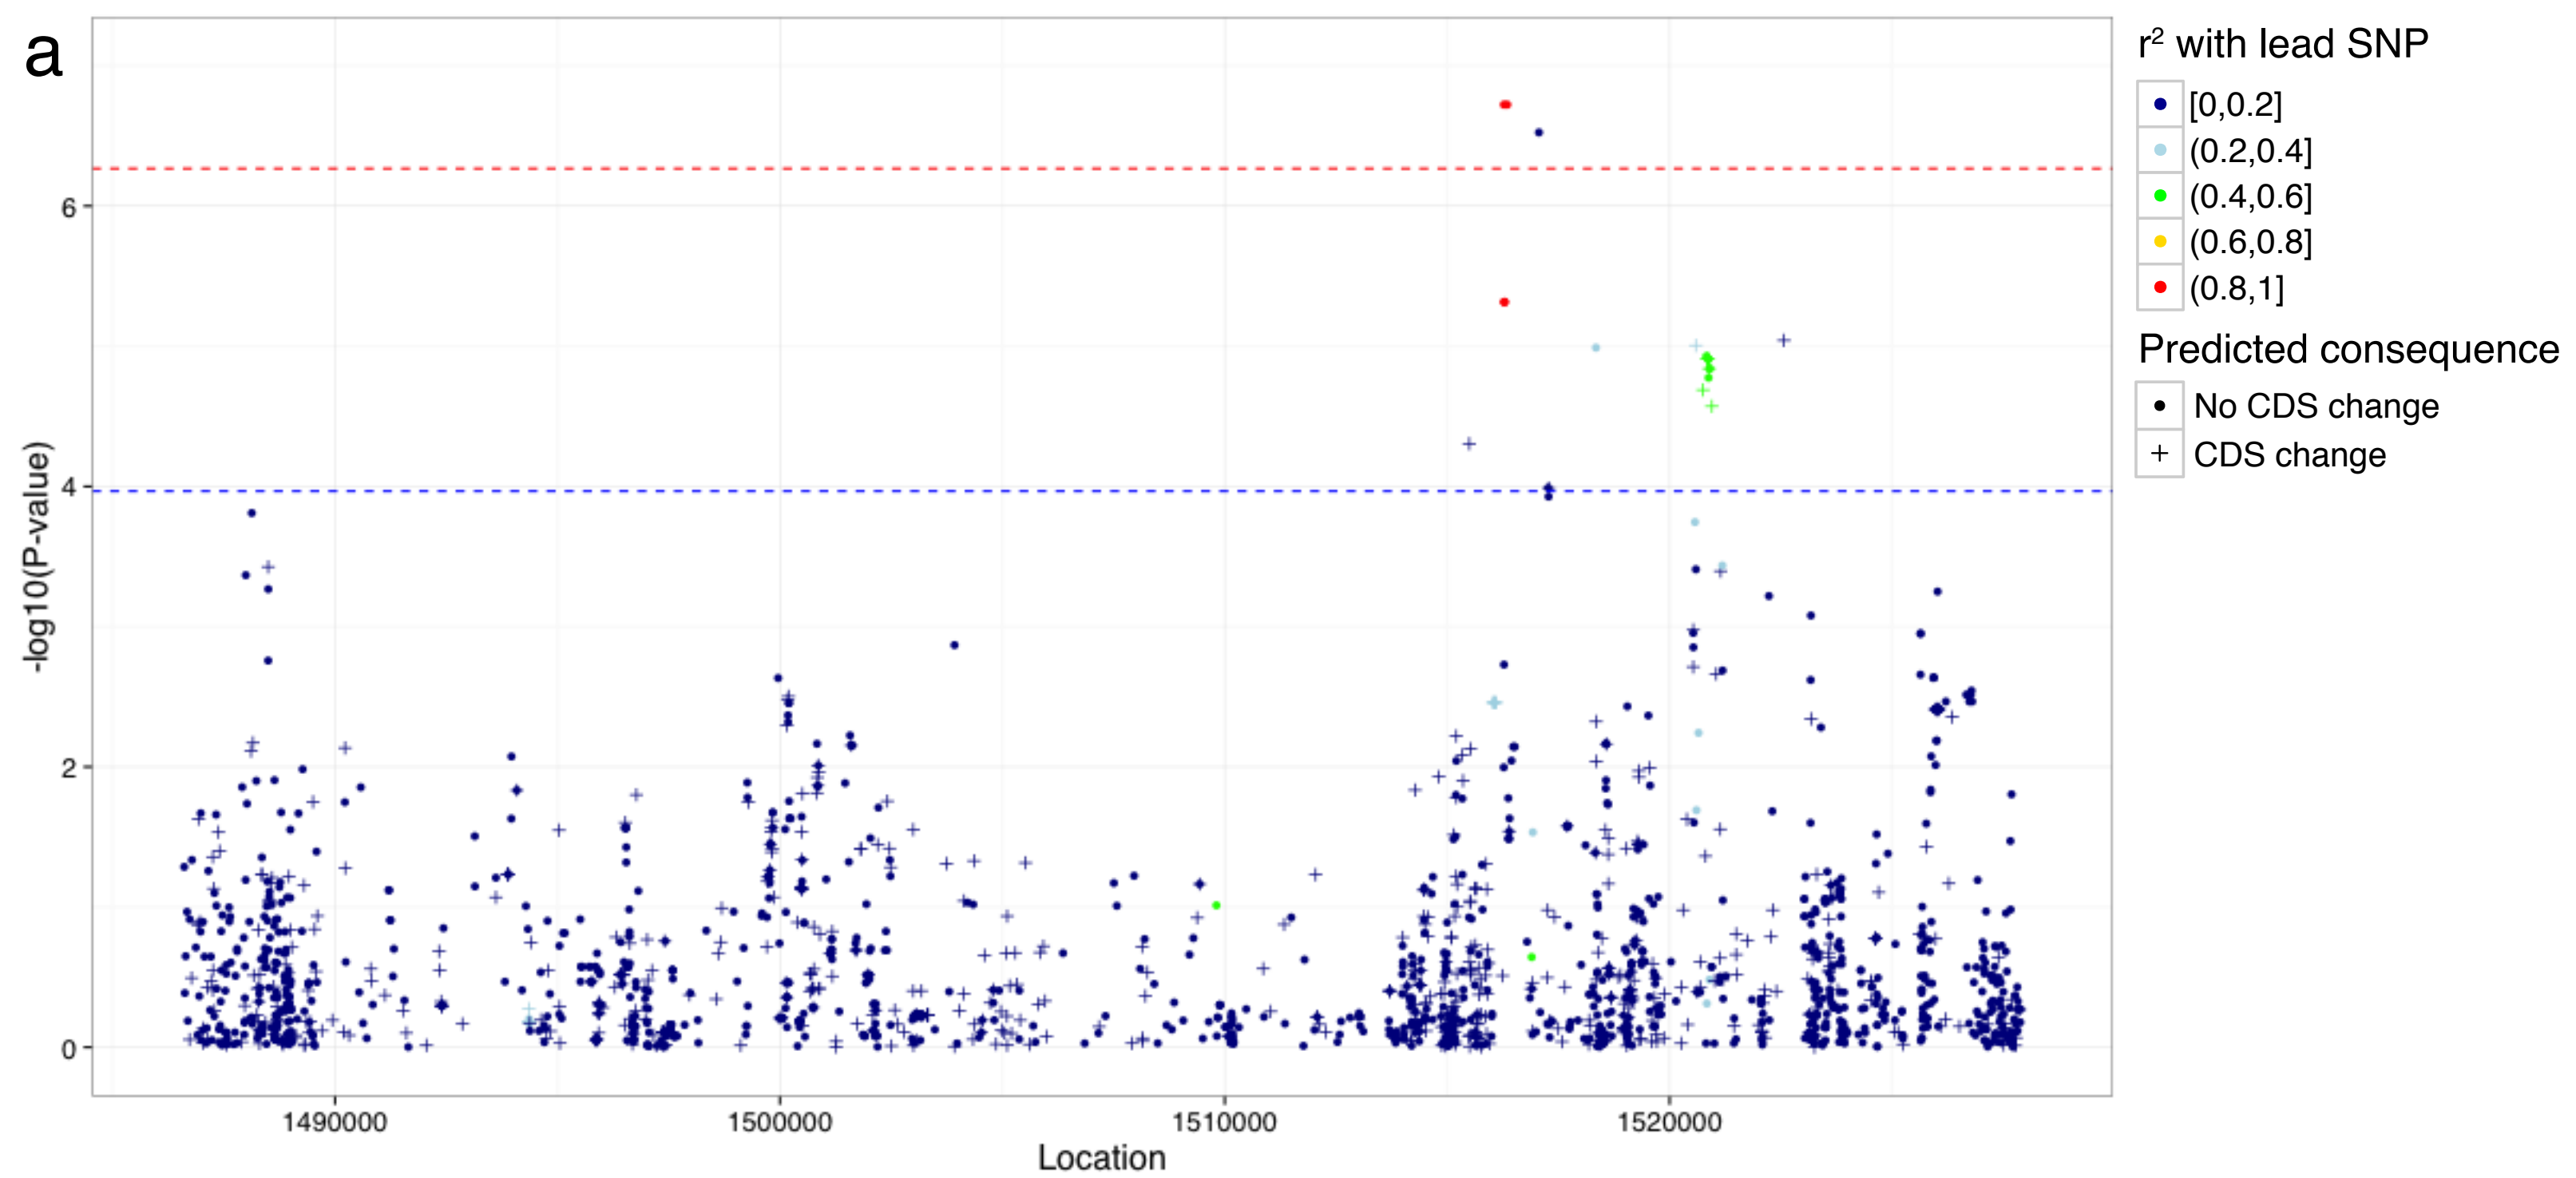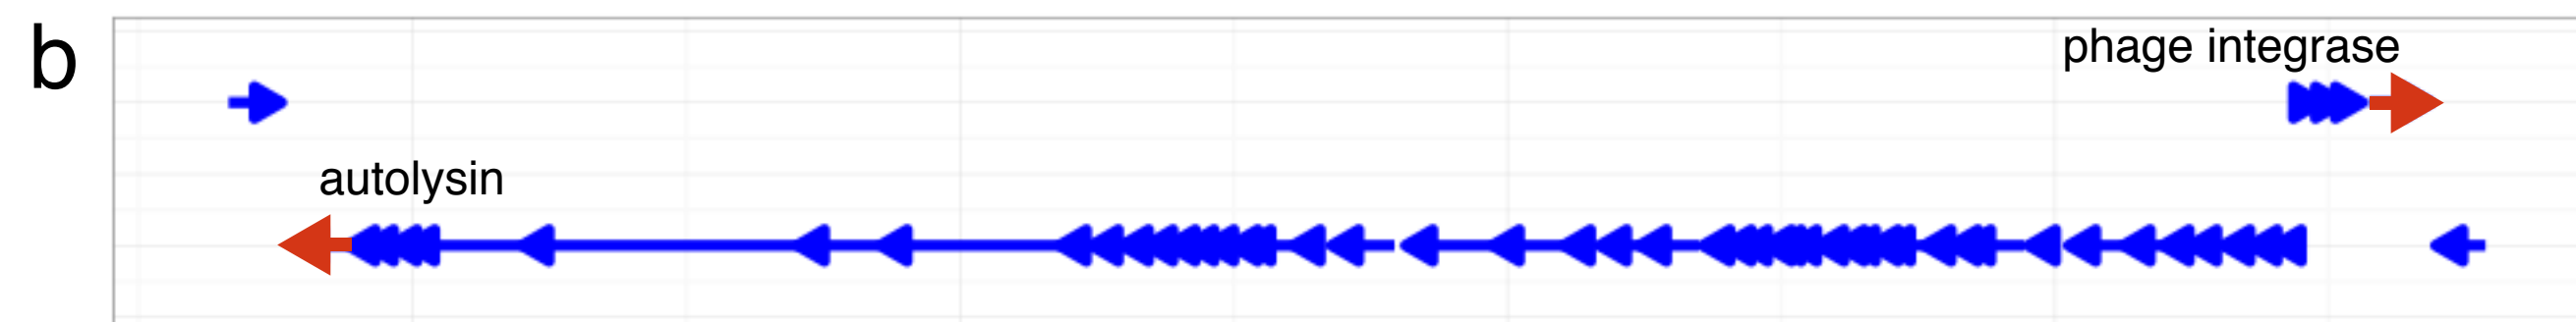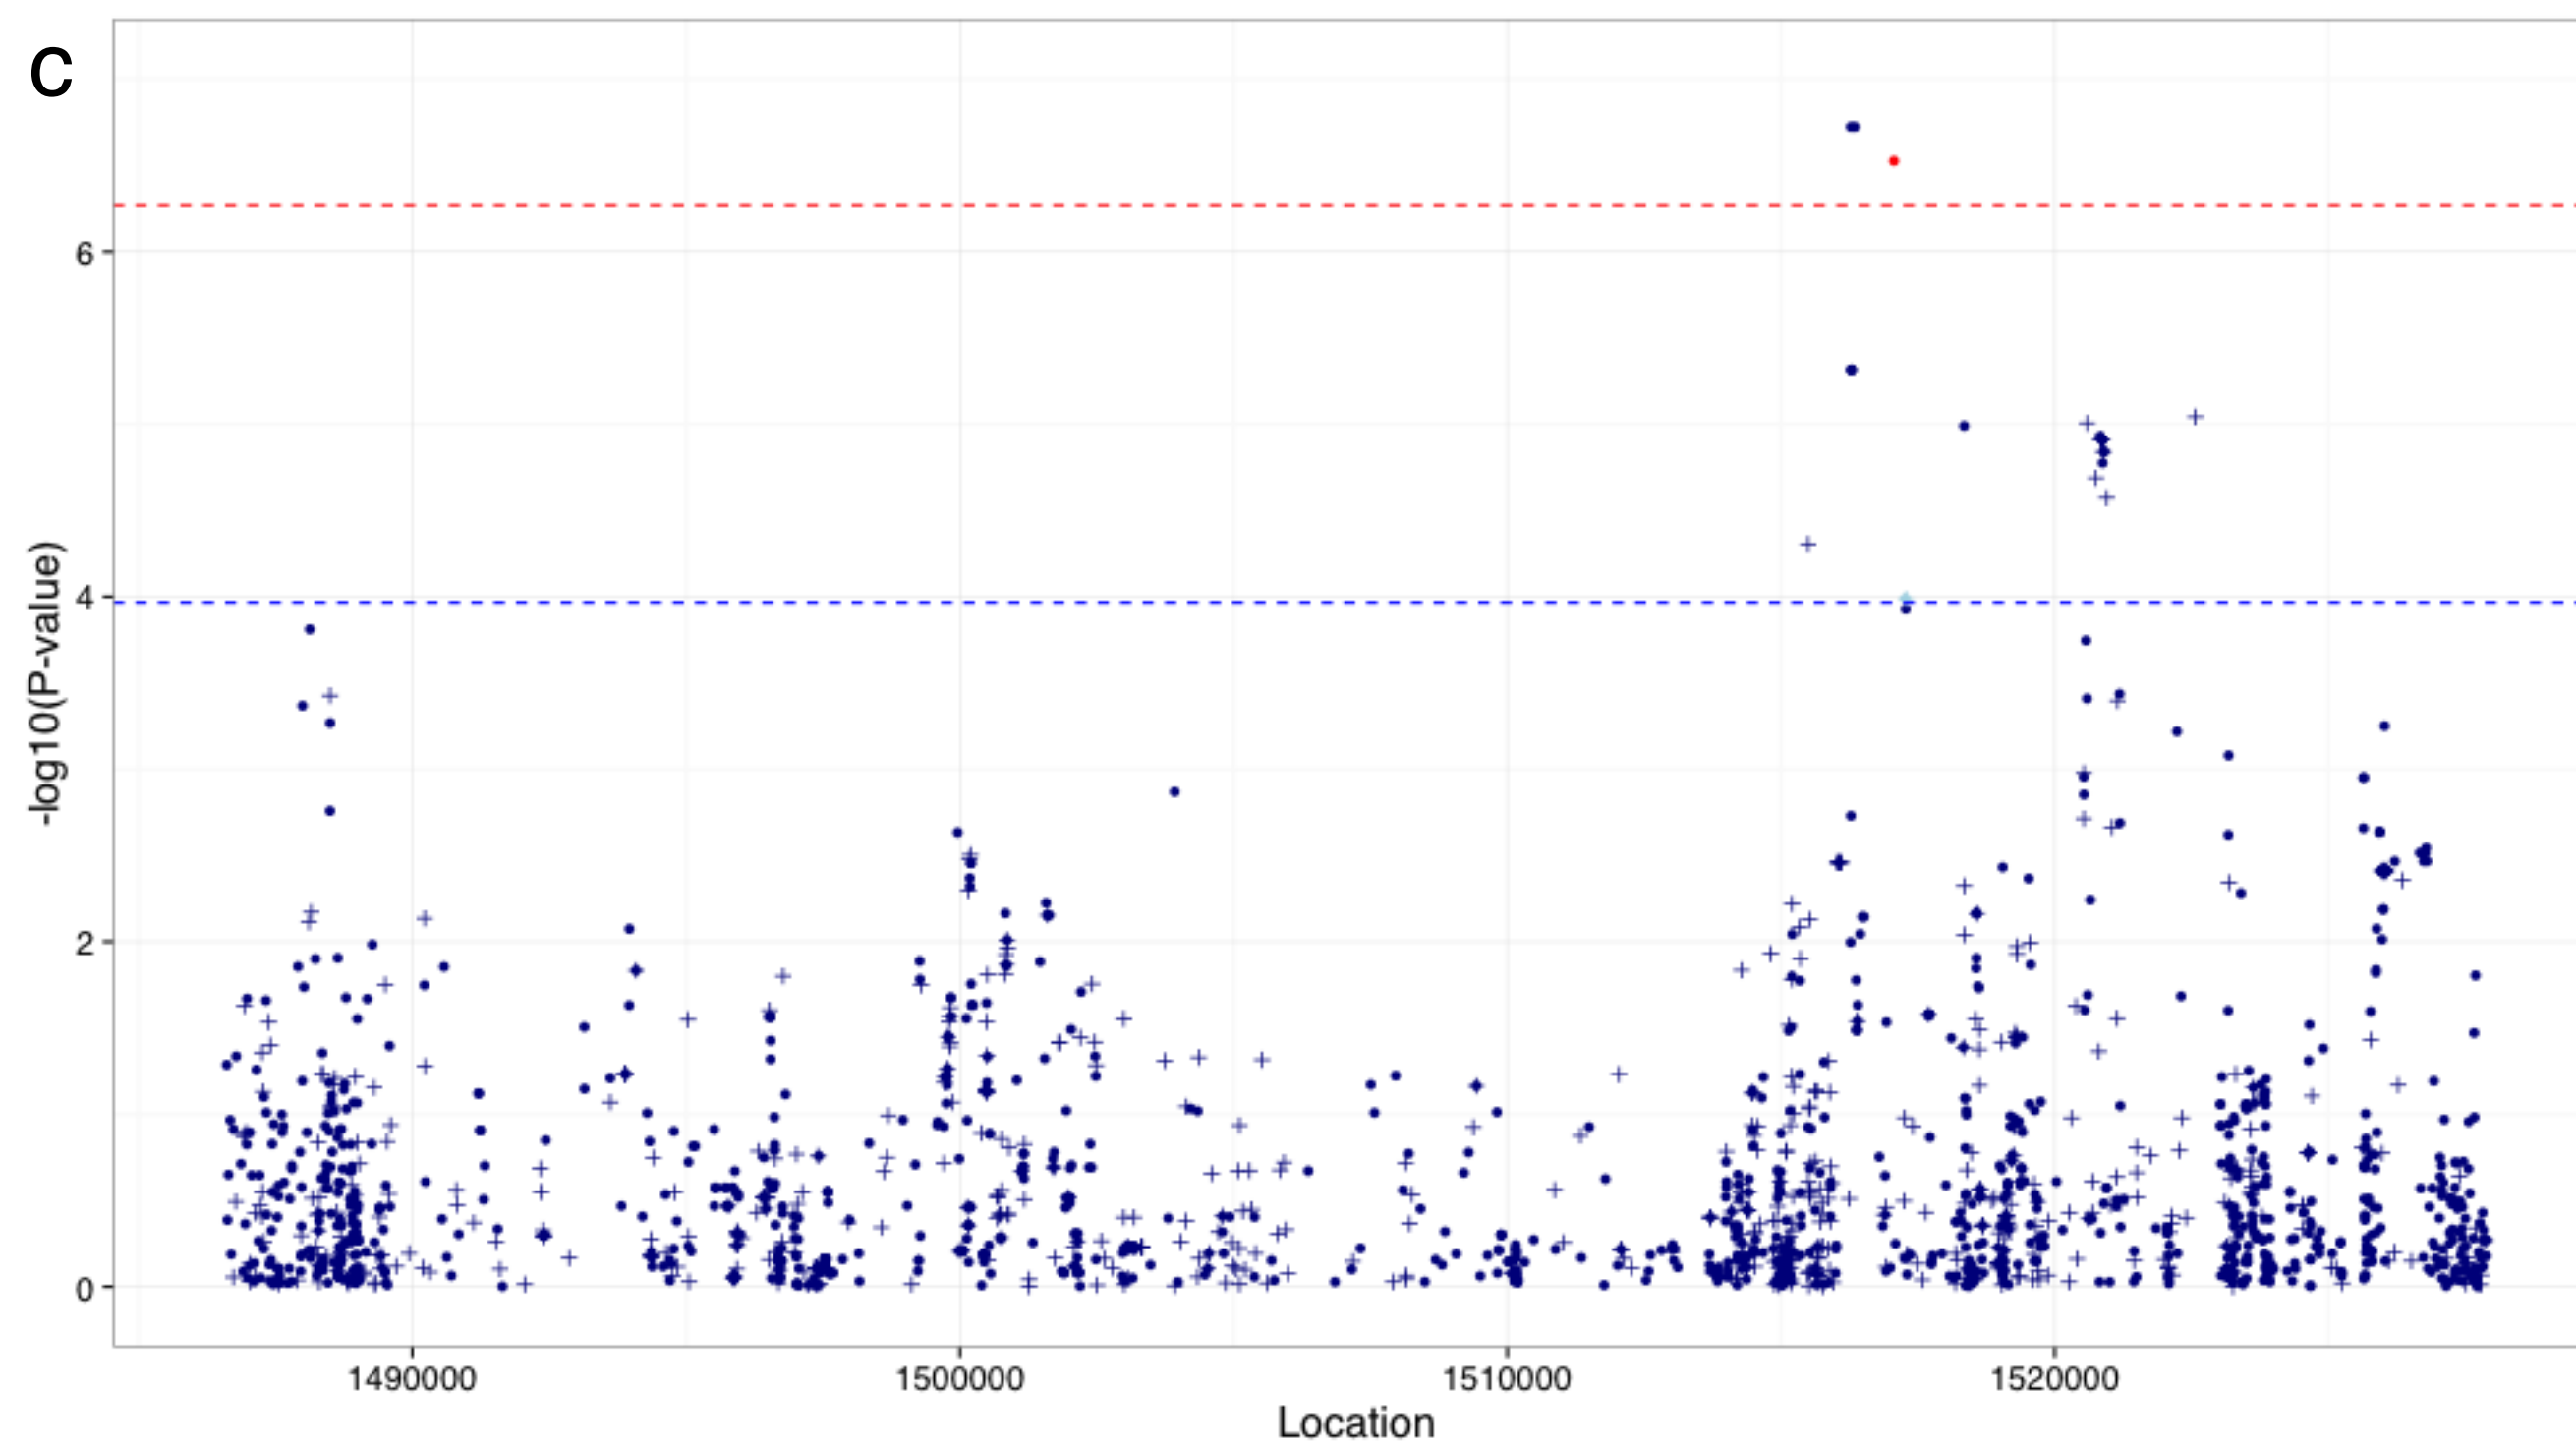

Supplement: supp [file elife-26255-supp-v1.zip › elife_poa_e26255_Figure_5_Figure_Supplement_4.pdf]

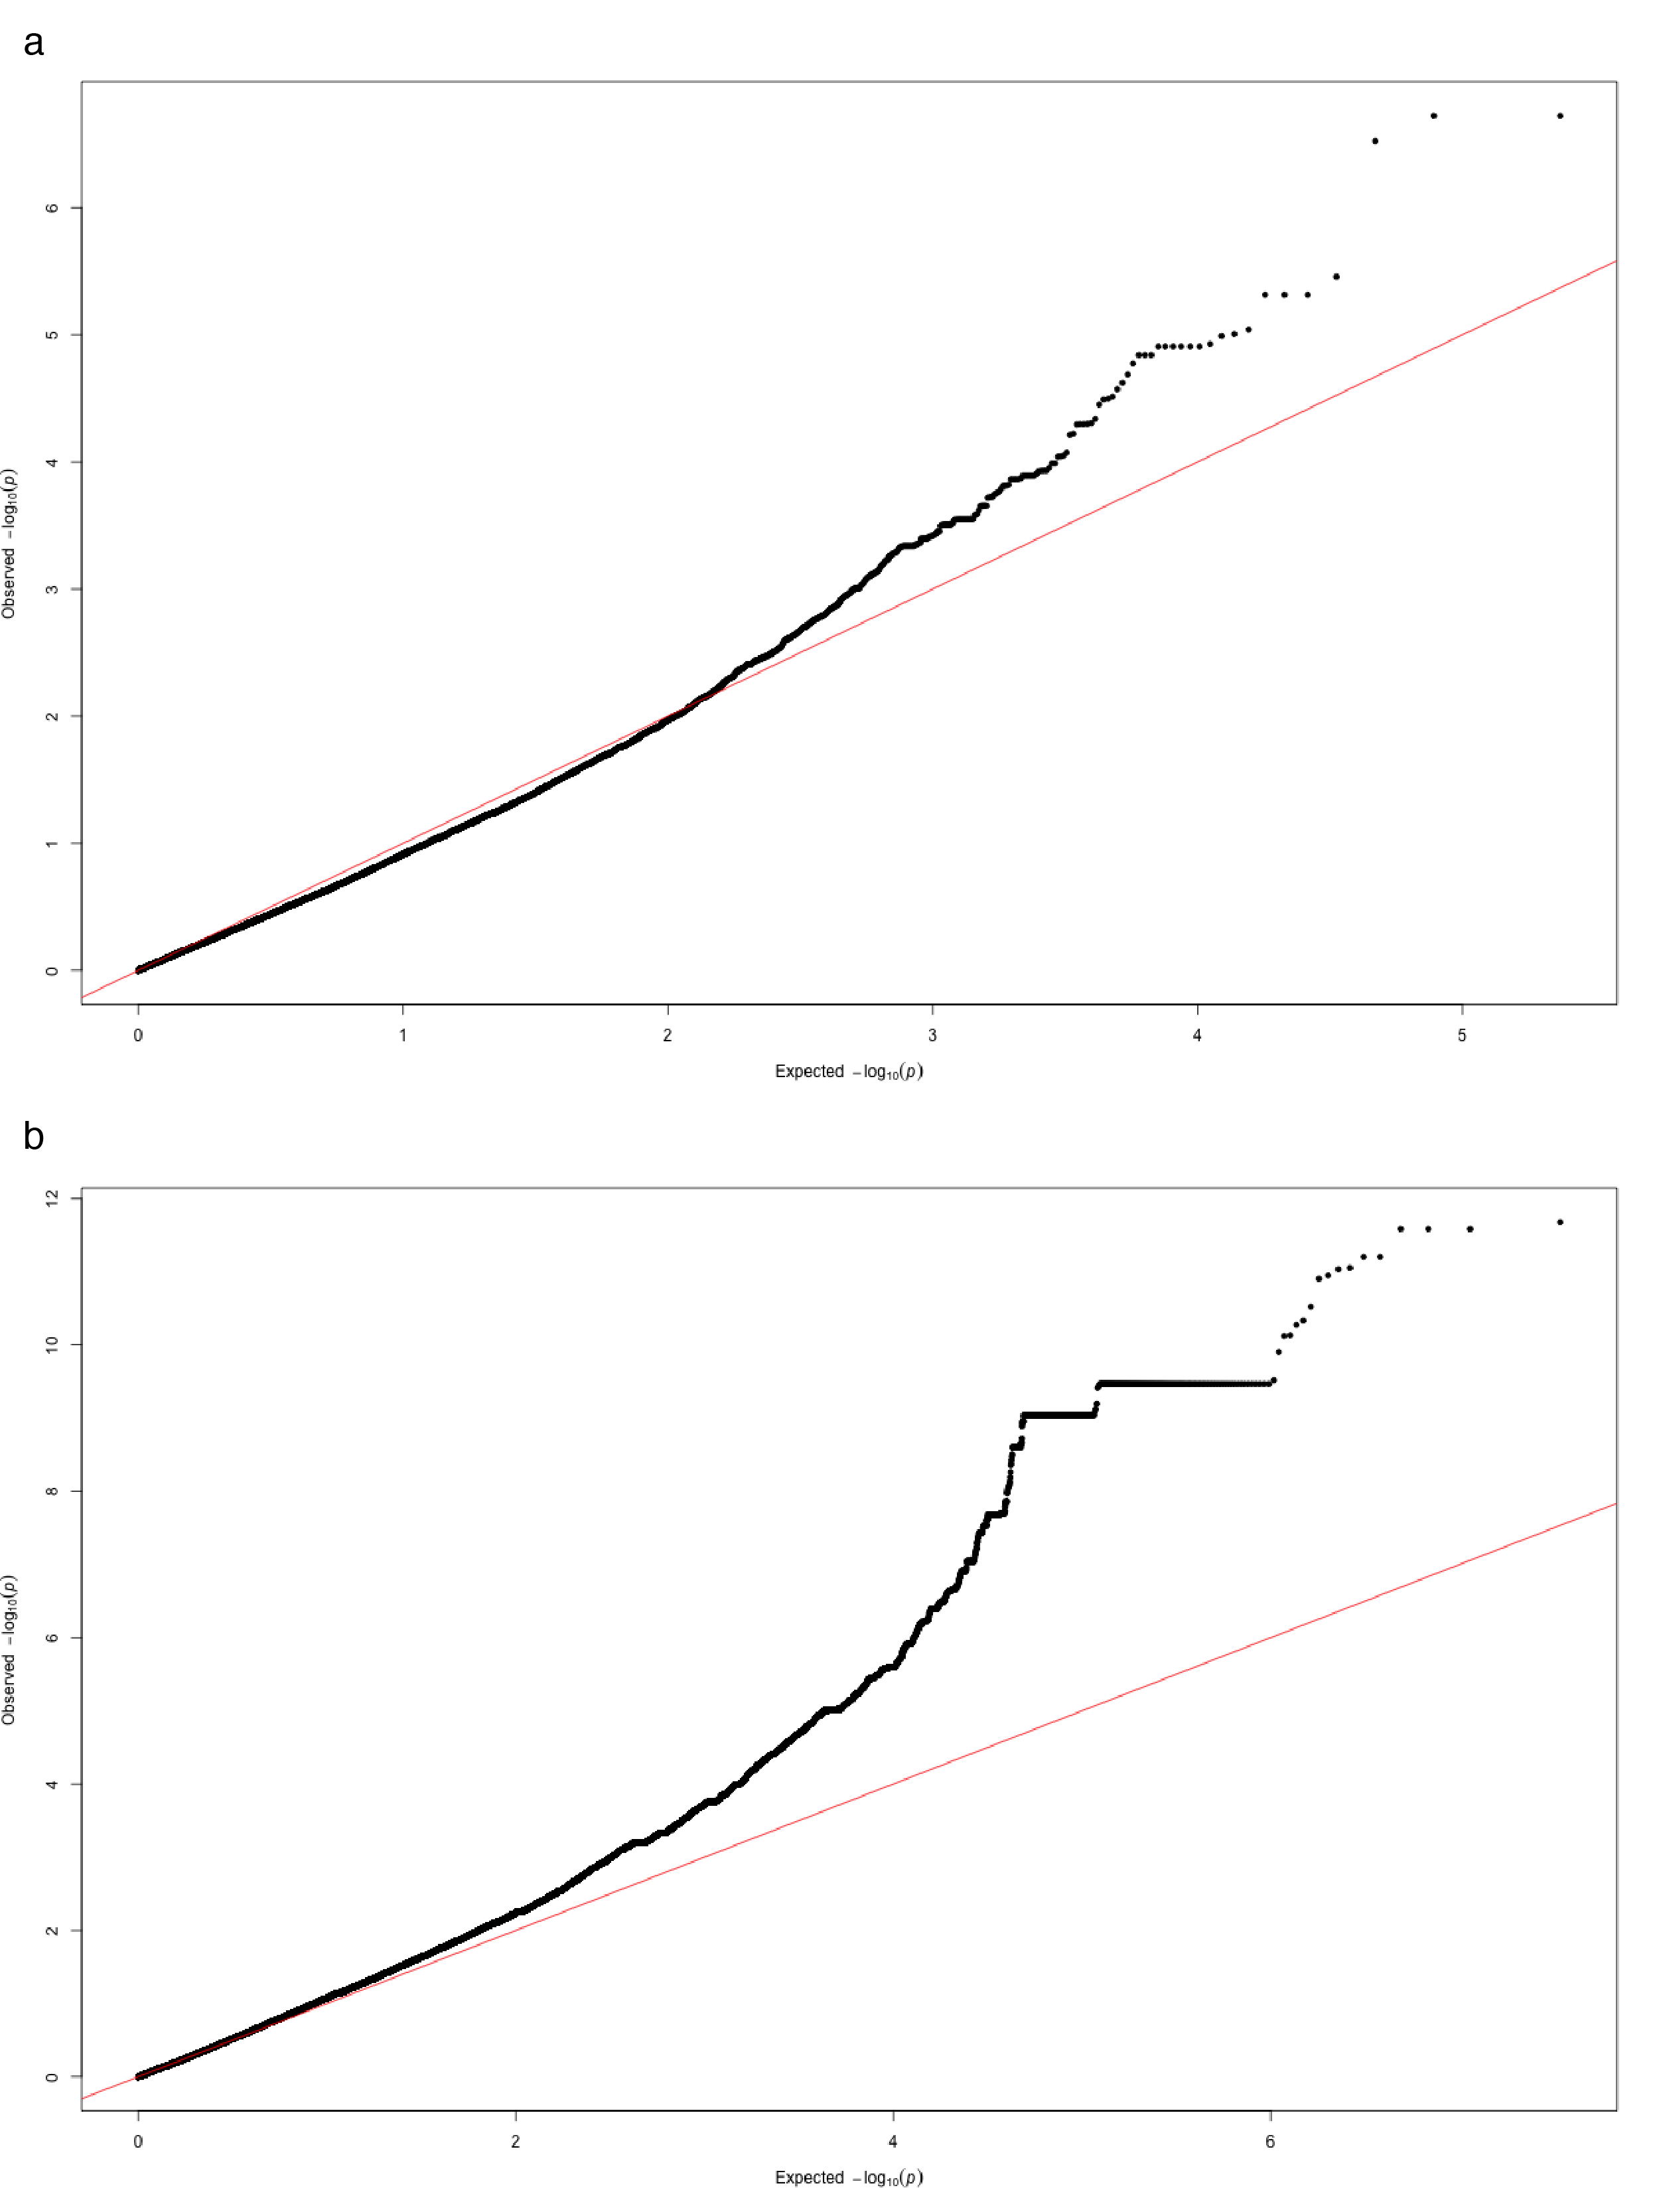

Supplement: supp [file elife-26255-supp-v1.zip › elife_poa_e26255_Figure_5_Figure_Supplement_3.png]
